# Supplementary material for: Integration of Stemness Gene Signatures Reveals Core Functional Modules of Stem Cells and Potential Novel Stemness Genes
Source: Genes (Basel). 2023 Mar 18;14(3):745. doi: 10.3390/genes14030745 (PMC10048104; doi:10.3390/genes14030745)
Supplement: Supplementary file 1 [file genes-14-00745-s001.zip › Supplementary_Tables_S1_S5.xlsx]

## Sheet: S1
Supplementary Table S1 – Description of individual stemness signatures
	Organism	Stem cell type	Class based on potency	Type of evidence	Platform	Number_of_genes	Author	Reference(Pubmed ID)
Expression Profiles
Hs_EC_Skotheim	Human	Embryonal Carcinoma Cells	Pluripotent	Microarray analysis	Agilent-011521 Human 1A Microarray G4110A	152	Skotheim	15994931
Hs_ESC_Assou	Human	Embryonic Stem Cells	Pluripotent	Meta-analysis	Several (meta-analysis)	1066	Assou	17204602
Hs_ESC_Bhattacharya	Human	Embryonic Stem Cells	Pluripotent	Microarray analysis	Customizable In-house Produced Array	89	Bhattacharya	15070671
Hs_ESC_EC_Sperger	Human	Embryonic Stem Cells/Embryonal Carcinoma Cells	Pluripotent	Microarray analysis	Not described	653	Sperger	14595015
Hs_ESC_Sato	Human	Embryonic Stem Cells	Pluripotent	Microarray analysis	Affymetrix human HG-U133A	17	Sato	12921741
Hs_ESC_Skottman	Human	Embryonic Stem Cells	Pluripotent	Microarray analysis	Affymetrix human HG-U133A and HG_U133B	58	Skottman	16081666
Hs_ESC_Wong	Human	Embryonic Stem Cells	Pluripotent	Microarray analysis	Several Affymetrix and customizable spotted cDNA arrays	335	Wong	18397753
Hs_HSC_Huang	Human	Hematopoietic Stem Cells	Multipotent	Meta-analysis	Affymetrix TM HG-U133 plus 2.0 and Affymetrix U133A	94	Huang	18308945
Hs_HSC_Novershtern	Human	Hematopoietic Stem Cells	Multipotent	Microarray analysis	Affymetrix GeneChip HT-HG_U133A Early Access Array	854	Novershtern	21241896
Hs_HSC_Toren	Human	Hematopoietic Stem Cells	Multipotent	Microarray analysis	Affymetrix Human Hu133A	106	Toren	16140871
Hs_iPSC_Shats	Human	induced Pluripotent Stem Cells	Pluripotent	Meta-analysis	Several (meta-analysis)	80	Shats	21169407
Hs_MaSC_Pece	Human	Mammary Epithelial Stem Cells	Multipotent	Microarray analysis	Affymetrix HG-U133_Plus_2	306	Pece	20074520
Hs_MSC_Huang	Human	Mesenchymal Stem Cells	Multipotent	Meta-analysis	Affymetrix TM HG-U133 plus 2.0	59	Huang	18308945
Hs_NSC_Huang	Human	Neuronal Stem Cells	Multipotent	Meta-analysis	Affymetrix TM HG-U133 plus 2.0	54	Huang	18308945
Hs_SC_Palmer	Human	Pluripotent and Partially Commited Stem Cells	Mixed	Microarray analysis Database (GEO/CONCORDIA)	Affymetrix HGU133 plus 2.0	184	Palmer	22909066
Hs_SC_Shats	Human	ESCs; tumorigenic CD44+CD24-/lowlin- cells and normal breast epithelium; hiPS cells, large collection of breast cancer tumors	Mixed	Meta-analysis	Several (meta-analysis)	81	Shats	21169407
Mm_ESC_Fortunel	Mouse	Embryonic Stem Cells	Pluripotent	Microarray analysis	Affymetrix U74Av2	1108	Fortunel	14563990
Mm_ESC_Gaspar	Mouse	Embryonic Stem Cells	Pluripotent	Microarray analysis	Affymetrix GeneChip Mouse Genome 430 2.0	148	Gaspar	22420508
Mm_ESC_Ivanova	Mouse	Embryonic Stem Cells	Pluripotent	Microarray analysis	Affymetrix MG-U74v2 A, B and C	967	Ivanova	12228721
Mm_ESC_Ramalho	Mouse	Embryonic Stem cells	Pluripotent	Microarray analysis	Affymetrix U74Av2	1177	Ramalho	12228720
Mm_HSC_Ivanova	Mouse	Hematopoietic Stem Cells	Multipotent	Microarray analysis	Affymetrix MG-U74v2 A, B and C	772	Ivanova	12228721
Mm_HSC_Ramalho	Mouse	Hematopoietic Stem Cells	Multipotent	Microarray analysis	Affymetrix U74Av2	1269	Ramalho	12228720
Mm_ISC_Munoz	Mouse	Intestinal Stem Cells	Multipotent	Meta-analysis	Affymetrix HT MG-430 PM Array plate; Agilent 4×44K Agilent Whole Mouse Genome dual color Microarrays	483	Munoz	22692129
Mm_NSC_D'Amour	Mouse	Neuronal Stem Cells	Multipotent	Microarray analysis	Affymetrix Murine-U74Av2 high-density oligo array	135	D'Amour	12923297
Mm_NSC_Fortunel	Mouse	Neuronal Stem Cells	Multipotent	Microarray analysis	Affymetrix U74Av2	1141	Fortunel	14563990
Mm_NSC_Ivanova	Mouse	Neuronal Stem Cells	Multipotent	Microarray analysis	Affymetrix MG-U74v2 A, B and C	840	Ivanova	12228721
Mm_NSC_Parker	Mouse	Neuronal Stem Cells	Multipotent	Microarray analysis	Affymetrix Murine Genome 430A 2.0	982	Parker	15992799
Mm_NSC_Ramalho	Mouse	Neuronal Stem Cells	Multipotent	Microarray analysis	Affymetrix U74Av2	1577	Ramalho	12228720
Mm_RPC_Fortunel	Mouse	Retinal Progenitor Stem Cells	Multipotent	Microarray analysis	Affymetrix U74Av2	1475	Fortunel	14563990
Mm_SC_Wong	Mouse	Hematopoietic Stem Cells, Hair Bulge Stem Cells and Neuronal Stem Cells	Multipotent	Microarray analysis	Several Affymetrix and customizable spotted cDNA arrays	735	Wong	18397753
Mm_SSC_Kokkinaki	Mouse	Spermatogonial Stem Cells	Unipotent	Microarray analysis	Affymetrix Mouse Genome 430 2.0 Array	99	Kokkinaki	19109221
RNAi screens
Hs_ESC_Chia	Human	Embryonic Stem Cells	Pluripotent	RNAi screen		507	Chia	20953172
Mm_ESC_Ding	Mouse	Embryonic Stem Cells	Pluripotent	RNAi screen		210	Ding	19345177
Mm_ESC_Hu	Mouse	Embryonic Stem Cells	Pluripotent	RNAi screen		147	Hu	19339689
Mm_ESC_Wang	Mouse	Embryonic Stem Cells	Pluripotent	RNAi screen		120	Wang	22899353
Mm_ESC_Yang	Mouse	Embryonic Stem Cells	Pluripotent	RNAi screen		129	Yang	23271975
Literature Curation
HSC-Explorer	Mouse	Hematopoeitic Stem Cells	Multipotent	Literature curation and Meta-analysis:		279	Explorer	23936191
KEGG	Human	Several types	Mixed	Literature curation: Gene set comprising genes of KEGG pathway "Signaling pathways regulating pluripotency of stem cells"		136	NA	24214961
PluriNetWork	Mouse	Embryonic Stem Cells	Pluripotent	Literature curation: A manually curated protein/gene interaction and regulation network with the purpose of describing pluripotency in mouse		274	NA	21179244
REACTOME	Human	Several types	Mixed	Literature curation: Gene set comprising genes of reactome pathway "Transcriptional regulation of pluripotent stem cells"		28	NA	24243840
Computationally Derived
GeneCards	Human		Mixed	Text-mining: GeneCards database was queried for the word "Stem Cell"		133	NA	20689021
PluriNet	Human	Embryonic stem cells, Embryonal carcinomas and induced Pluripotent stem cells	Pluripotent	Computational network: Protein-protein network shared by pluripotent cells uncovered by bioinformatic analysis		299	NA	18724358

## Sheet: S2
Supplementary Table S2 – Human stemness genes ranked list.
Ranked list of all human genes sorted according to their occurrence ("Score") in individual stemness signatures in human.
Genes (rows) which also belong to human Integrated Stemness Signature (ISS) are in grey.
When a gene (row) is present in one individual stemness signature (column) cell number is "1", otherwise "0"
							Individual Stemness Signatures
						Potency class	Pluripotent	Pluripotent	Pluripotent	Pluripotent	Pluripotent	Pluripotent	Pluripotent	Multipotent	Multipotent	Multipotent	Pluripotent	Multipotent	Multipotent	Multipotent	Mixed	Mixed	Pluripotent	Mixed	Mixed	Mixed	Pluripotent
						Evidence base	Expression	Expression	Expression	Expression	Expression	Expression	Expression	Expression	Expression	Expression	Expression	Expression	Expression	Expression	Expression	Expression	RNAi	Literature	Literature	Computational	Computational
							Hs_EC_Skotheim	Hs_ESC_Assou	Hs_ESC_Bhattacharya	Hs_ESC_EC_Sperger	Hs_ESC_Sato	Hs_ESC_Skottman	Hs_ESC_Wong	Hs_HSC_Huang	Hs_HSC_Novershtern	Hs_HSC_Toren	Hs_iPSC_Shats	Hs_MaSC_Pece	Hs_MSC_Huang	Hs_NSC_Huang	Hs_SC_Palmer	Hs_SC_Shats	Hs_ESC_Chia	KEGG	REACTOME	GeneCards	PluriNet
Total number of genes of each individual stemness signature							152	1066	89	653	17	58	335	94	854	106	80	306	59	54	184	81	507	136	28	133	299
Number of genes of each individual stemness signature that are also in human ISS							40	151	49	105	9	17	72	18	58	22	31	13	1	4	32	24	13	13	11	17	67
Gene Description
Gene_id	Gene_symbol	Overall Score	Pluripotency score	Multipotency score	Normalised Pluripotency score	Normalised Multipotency score
5460	OCT4	12	9	0	0.9	0	1	1	1	1	1	1	0	0	0	0	1	0	0	0	0	0	1	1	1	1	1
1789	DNMT3B	10	6	3	0.6	0.5	1	1	0	1	0	1	0	1	1	1	1	0	0	0	1	0	0	0	0	0	1
6657	SOX2	9	5	1	0.5	0.166667	0	1	0	1	0	1	1	0	0	0	1	0	0	1	0	0	0	1	1	1	0
79923	NANOG	9	6	1	0.6	0.166667	1	1	1	0	0	1	0	0	1	0	1	0	0	0	0	0	0	1	1	0	1
55211	DPPA4	8	5	3	0.5	0.5	1	1	0	1	1	1	0	1	1	1	0	0	0	0	0	0	0	0	0	0	0
8842	PROM1	8	5	3	0.5	0.5	1	1	0	1	1	0	1	1	1	1	0	0	0	0	0	0	0	0	0	0	0
22929	SEPHS1	7	6	1	0.6	0.166667	0	1	1	1	1	0	0	0	1	0	1	0	0	0	0	0	0	0	0	0	1
4613	MYCN	7	3	3	0.3	0.5	0	1	0	1	0	0	0	1	1	1	1	0	0	0	1	0	0	0	0	0	0
9573	GDF3	6	4	0	0.4	0	1	1	1	0	0	1	0	0	0	0	0	0	0	0	1	0	0	0	0	1	0
8820	HESX1	6	3	0	0.3	0	1	1	0	1	0	0	0	0	0	0	0	0	0	0	1	0	0	1	0	1	0
3720	JARID2	6	4	0	0.4	0	1	1	0	1	0	0	0	0	0	0	1	0	0	0	0	0	0	1	0	1	0
11168	PSIP1	6	5	0	0.5	0	0	1	1	0	1	0	0	0	0	0	1	0	0	0	0	0	0	0	0	1	1
10606	PAICS	6	3	1	0.3	0.166667	1	1	0	1	0	0	0	0	1	0	0	0	0	0	1	1	0	0	0	0	0
5358	PLS3	6	4	2	0.4	0.333333	1	1	0	1	0	0	0	0	1	1	0	0	0	0	0	0	1	0	0	0	0
586	BCAT1	6	4	1	0.4	0.166667	1	1	0	1	0	0	1	0	1	0	0	0	0	0	1	0	0	0	0	0	0
7013	TERF1	6	6	0	0.6	0	1	1	0	1	0	1	1	0	0	0	1	0	0	0	0	0	0	0	0	0	0
6997	TDGF1	6	5	0	0.5	0	0	1	1	0	0	1	0	0	0	0	1	0	0	0	0	0	0	0	1	0	1
4678	NASP	6	4	2	0.4	0.333333	0	1	1	1	0	0	1	0	1	0	0	1	0	0	0	0	0	0	0	0	0
4436	MSH2	6	4	0	0.4	0	0	1	0	1	0	0	1	0	0	0	0	0	0	0	1	1	0	0	0	0	1
4173	MCM4	6	4	0	0.4	0	0	1	0	1	0	0	1	0	0	0	0	0	0	0	1	1	0	0	0	0	1
3182	HNRNPAB	6	5	1	0.5	0.166667	0	1	1	1	0	0	1	0	1	0	0	0	0	0	0	0	0	0	0	0	1
2247	FGF2	6	2	1	0.2	0.166667	0	1	0	1	0	0	0	0	0	0	0	0	1	0	1	0	0	1	1	0	0
1829	DSG2	6	3	3	0.3	0.5	0	1	1	1	0	0	0	1	1	1	0	0	0	0	0	0	0	0	0	0	0
4831	NME2	6	5	1	0.5	0.166667	0	1	1	1	0	0	1	0	1	0	0	0	0	0	0	0	0	0	0	0	1
55353	LAPTM4B	6	3	3	0.3	0.5	0	1	1	1	0	0	0	1	1	1	0	0	0	0	0	0	0	0	0	0	0
947	CD34	5	1	3	0.1	0.5	0	0	0	0	0	0	0	1	1	1	0	0	0	0	0	0	1	0	0	1	0
26354	GNL3	5	4	0	0.4	0	0	1	1	0	0	0	1	0	0	0	0	0	0	0	0	0	0	0	0	1	1
3815	KIT	5	1	3	0.1	0.5	0	0	0	0	0	0	0	1	1	1	0	0	0	0	0	0	0	0	0	1	1
79727	LIN28A	5	3	0	0.3	0	0	1	0	0	0	1	0	0	0	0	1	0	0	0	0	0	0	0	1	1	0
22823	MTF2	5	3	1	0.3	0.166667	0	1	0	1	0	0	1	0	1	0	0	0	0	0	0	0	0	0	0	1	0
63978	PRDM14	5	3	0	0.3	0	1	1	0	0	0	0	0	0	0	0	0	0	0	0	0	0	1	0	1	1	0
23528	ZNF281	5	3	1	0.3	0.166667	0	1	0	1	0	0	0	0	1	0	0	0	0	0	0	0	0	0	0	1	1
57380	MRS2	5	4	1	0.4	0.166667	1	1	0	1	0	0	0	0	1	0	1	0	0	0	0	0	0	0	0	0	0
2171	FABP5	5	4	1	0.4	0.166667	1	1	1	1	0	0	0	0	1	0	0	0	0	0	0	0	0	0	0	0	0
2731	GLDC	5	5	0	0.5	0	1	1	0	1	0	0	1	0	0	0	1	0	0	0	0	0	0	0	0	0	0
29088	MRPL15	5	4	1	0.4	0.166667	1	1	0	1	0	0	1	0	1	0	0	0	0	0	0	0	0	0	0	0	0
4257	MGST1	5	5	0	0.5	0	1	1	1	1	0	1	0	0	0	0	0	0	0	0	0	0	0	0	0	0	0
5052	PRDX1	5	4	1	0.4	0.166667	1	1	0	1	0	0	1	0	1	0	0	0	0	0	0	0	0	0	0	0	0
51083	GAL	5	5	0	0.5	0	1	1	1	1	1	0	0	0	0	0	0	0	0	0	0	0	0	0	0	0	0
57556	SEMA6A	5	4	1	0.4	0.166667	1	1	1	1	0	0	0	0	1	0	0	0	0	0	0	0	0	0	0	0	0
657	BMPR1A	5	3	0	0.3	0	0	1	0	1	0	0	0	0	0	0	1	0	0	0	1	0	0	1	0	0	0
4998	ORC1	5	4	0	0.4	0	0	1	0	1	0	0	1	0	0	0	0	0	0	0	1	0	0	0	0	0	1
9053	MAP7	5	2	3	0.2	0.5	0	1	0	0	0	0	0	1	1	1	1	0	0	0	0	0	0	0	0	0	0
3159	HMGA1	5	4	1	0.4	0.166667	0	1	1	1	0	0	0	0	1	0	0	0	0	0	0	0	0	0	0	0	1
3838	KPNA2	5	5	0	0.5	0	0	1	1	1	0	0	1	0	0	0	0	0	0	0	0	0	0	0	0	0	1
891	CCNB1	5	3	0	0.3	0	0	1	1	0	0	0	0	0	0	0	0	0	0	0	1	1	0	0	0	0	1
11200	CHEK2	5	4	0	0.4	0	0	1	0	1	0	0	1	0	0	0	0	0	0	0	1	0	0	0	0	0	1
332	BIRC5	5	4	0	0.4	0	0	1	0	1	0	0	1	0	0	0	0	0	0	0	0	1	0	0	0	0	1
2824	GPM6B	5	3	2	0.3	0.333333	0	1	0	1	0	0	0	0	1	0	1	0	0	1	0	0	0	0	0	0	0
8880	FUBP1	5	4	1	0.4	0.166667	0	1	0	1	0	0	0	0	1	0	0	0	0	0	0	0	1	0	0	0	1
890	CCNA2	5	3	0	0.3	0	0	1	0	0	0	0	1	0	0	0	0	0	0	0	1	1	0	0	0	0	1
701	BUB1B	5	3	0	0.3	0	0	1	0	0	0	0	1	0	0	0	0	0	0	0	1	1	0	0	0	0	1
2697	GJA1	5	5	0	0.5	0	0	1	1	1	0	1	1	0	0	0	0	0	0	0	0	0	0	0	0	0	0
983	CDK1	5	4	0	0.4	0	0	1	1	0	0	0	1	0	0	0	0	0	0	0	0	1	0	0	0	0	1
9212	AURKB	5	5	0	0.5	0	0	1	1	1	0	0	1	0	0	0	0	0	0	0	0	0	0	0	0	0	1
2956	MSH6	5	3	1	0.3	0.166667	0	1	0	0	0	0	0	0	1	0	1	0	0	0	1	0	0	0	0	0	1
10797	MTHFD2	5	4	0	0.4	0	0	1	1	1	0	0	1	0	0	0	0	0	0	0	1	0	0	0	0	0	0
6636	SNRPF	5	4	1	0.4	0.166667	0	1	1	1	0	0	0	0	1	0	0	0	0	0	0	0	0	0	0	0	1
6418	SET	5	5	0	0.5	0	0	1	1	1	0	0	1	0	0	0	0	0	0	0	0	0	0	0	0	0	1
5087	PBX1	5	3	1	0.3	0.166667	0	1	0	1	0	0	0	0	1	0	0	0	0	0	0	0	0	0	1	0	1
7520	XRCC5	5	3	1	0.3	0.166667	0	1	0	0	0	0	1	0	0	0	0	1	0	0	1	0	0	0	0	0	1
4602	MYB	5	2	3	0.2	0.5	0	1	0	0	0	0	0	1	1	1	0	0	0	0	0	0	0	0	0	0	1
1163	CKS1B	5	4	0	0.4	0	0	1	0	1	0	0	1	0	0	0	0	0	0	0	0	1	0	0	0	0	1
5245	PHB	5	4	1	0.4	0.166667	0	0	0	1	0	0	1	0	1	0	0	0	0	0	0	0	1	0	0	0	1
91851	CHRDL1	4	1	2	0.1	0.333333	0	0	0	0	0	0	0	1	1	0	0	0	0	0	0	0	1	0	0	1	0
4072	EPCAM	4	3	0	0.3	0	0	1	0	1	0	0	0	0	0	0	1	0	0	0	0	0	0	0	0	1	0
57167	SALL4	4	2	0	0.2	0	0	1	0	0	0	0	0	0	0	0	0	0	0	0	0	0	0	0	1	1	1
132625	ZFP42	4	3	0	0.3	0	0	1	0	0	0	1	0	0	0	0	0	0	0	0	0	0	0	0	0	1	1
5558	PRIM2	4	4	0	0.4	0	1	1	0	1	0	0	1	0	0	0	0	0	0	0	0	0	0	0	0	0	0
6611	SMS	4	4	0	0.4	0	1	1	1	1	0	0	0	0	0	0	0	0	0	0	0	0	0	0	0	0	0
6428	SRSF3	4	3	1	0.3	0.166667	1	0	0	0	0	0	0	0	0	0	0	1	0	0	0	0	1	0	0	0	1
6432	SRSF7	4	3	1	0.3	0.166667	1	1	1	0	0	0	0	0	0	0	0	1	0	0	0	0	0	0	0	0	0
11169	WDHD1	4	4	0	0.4	0	1	1	0	1	0	0	1	0	0	0	0	0	0	0	0	0	0	0	0	0	0
10157	AASS	4	3	1	0.3	0.166667	1	1	0	0	0	0	0	0	1	0	1	0	0	0	0	0	0	0	0	0	0
10197	PSME3	4	4	0	0.4	0	1	1	0	0	0	0	1	0	0	0	0	0	0	0	0	0	0	0	0	0	1
11065	UBE2C	4	3	0	0.3	0	1	1	0	1	0	0	0	0	0	0	0	0	0	0	0	1	0	0	0	0	0
1973	EIF4A1	4	4	0	0.4	0	1	1	1	0	0	0	1	0	0	0	0	0	0	0	0	0	0	0	0	0	0
22800	RRAS2	4	3	0	0.3	0	1	1	0	1	0	0	0	0	0	0	0	0	0	0	1	0	0	0	0	0	0
23401	FRAT2	4	4	0	0.4	0	1	1	0	0	1	0	0	0	0	0	1	0	0	0	0	0	0	0	0	0	0
3295	HSD17B4	4	4	0	0.4	0	1	1	0	1	0	0	0	0	0	0	1	0	0	0	0	0	0	0	0	0	0
4494	MT1F	4	3	1	0.3	0.166667	1	1	0	1	0	0	0	0	0	0	0	1	0	0	0	0	0	0	0	0	0
4496	MT1H	4	3	1	0.3	0.166667	1	1	0	1	0	0	0	0	0	0	0	1	0	0	0	0	0	0	0	0	0
4501	MT1X	4	3	1	0.3	0.166667	1	1	0	1	0	0	0	0	0	0	0	1	0	0	0	0	0	0	0	0	0
4522	MTHFD1	4	4	0	0.4	0	1	1	1	0	0	0	0	0	0	0	0	0	0	0	0	0	0	0	0	0	1
471	ATIC	4	4	0	0.4	0	1	1	0	1	0	0	0	0	0	0	0	0	0	0	0	0	0	0	0	0	1
5216	PFN1	4	4	0	0.4	0	1	1	0	1	0	0	0	0	0	0	0	0	0	0	0	0	0	0	0	0	1
8519	IFITM1	4	4	0	0.4	0	1	1	1	1	0	0	0	0	0	0	0	0	0	0	0	0	0	0	0	0	0
10637	LEFTY1	4	4	0	0.4	0	0	1	1	0	1	1	0	0	0	0	0	0	0	0	0	0	0	0	0	0	0
5471	PPAT	4	3	1	0.3	0.166667	0	1	1	1	0	0	0	0	1	0	0	0	0	0	0	0	0	0	0	0	0
6566	SLC16A1	4	4	0	0.4	0	0	1	1	1	0	0	1	0	0	0	0	0	0	0	0	0	0	0	0	0	0
9787	DLGAP5	4	2	0	0.2	0	0	1	0	0	0	0	1	0	0	0	0	0	0	0	1	1	0	0	0	0	0
7547	ZIC3	4	2	0	0.2	0	0	1	0	0	0	0	1	0	0	0	0	0	0	0	0	0	0	1	1	0	0
4172	MCM3	4	4	0	0.4	0	0	1	0	1	0	0	1	0	0	0	0	0	0	0	0	0	0	0	0	0	1
54845	ESRP1	4	4	0	0.4	0	0	1	0	1	0	1	0	0	0	0	1	0	0	0	0	0	0	0	0	0	0
10622	POLR3G	4	3	1	0.3	0.166667	0	1	0	1	1	0	0	0	1	0	0	0	0	0	0	0	0	0	0	0	0
142	PARP1	4	4	0	0.4	0	0	1	0	1	0	0	1	0	0	0	0	0	0	0	0	0	0	0	0	0	1
55920	RCC2	4	4	0	0.4	0	0	1	1	1	0	0	1	0	0	0	0	0	0	0	0	0	0	0	0	0	0
1381	CRABP1	4	4	0	0.4	0	0	1	1	1	0	0	0	0	0	0	1	0	0	0	0	0	0	0	0	0	0
5420	PODXL	4	4	0	0.4	0	0	1	1	0	0	1	0	0	0	0	1	0	0	0	0	0	0	0	0	0	0
6297	SALL2	4	3	1	0.3	0.166667	0	1	0	1	0	0	0	0	1	0	1	0	0	0	0	0	0	0	0	0	0
4913	NTHL1	4	4	0	0.4	0	0	1	0	1	0	0	1	0	0	0	0	0	0	0	0	0	0	0	0	0	1
55299	BRIX1	4	4	0	0.4	0	0	1	1	0	0	0	1	0	0	0	0	0	0	0	0	0	0	0	0	0	1
2260	FGFR1	4	3	0	0.3	0	0	1	0	1	0	0	1	0	0	0	0	0	0	0	0	0	0	1	0	0	0
51268	PIPOX	4	4	0	0.4	0	0	1	0	1	0	0	1	0	0	0	1	0	0	0	0	0	0	0	0	0	0
8324	FZD7	4	2	1	0.2	0.166667	0	1	0	1	0	0	0	0	1	0	0	0	0	0	0	0	0	1	0	0	0
57633	LRRN1	4	3	1	0.3	0.166667	0	1	1	1	0	0	0	0	0	0	0	0	0	1	0	0	0	0	0	0	0
8805	TRIM24	4	2	1	0.2	0.166667	0	1	0	0	0	0	0	0	1	0	1	0	0	0	1	0	0	0	0	0	0
4175	MCM6	4	2	0	0.2	0	0	1	0	0	0	0	0	0	0	0	0	0	0	0	1	1	0	0	0	0	1
347733	TUBB2B	4	2	2	0.2	0.333333	0	1	0	0	0	0	0	0	0	0	1	1	0	1	0	0	0	0	0	0	0
3856	KRT8	4	3	1	0.3	0.166667	0	1	1	1	0	0	0	0	0	0	0	1	0	0	0	0	0	0	0	0	0
8577	TMEFF1	4	3	1	0.3	0.166667	0	1	0	1	0	0	1	0	1	0	0	0	0	0	0	0	0	0	0	0	0
1382	CRABP2	4	4	0	0.4	0	0	1	1	1	0	0	1	0	0	0	0	0	0	0	0	0	0	0	0	0	0
6741	SSB	4	4	0	0.4	0	0	1	1	0	0	0	1	0	0	0	0	0	0	0	0	0	0	0	0	0	1
27022	FOXD3	4	3	0	0.3	0	0	1	0	1	0	1	0	0	0	0	0	0	0	0	0	0	0	0	1	0	0
24137	KIF4A	4	3	0	0.3	0	0	1	1	0	0	0	1	0	0	0	0	0	0	0	0	1	0	0	0	0	0
4171	MCM2	4	4	0	0.4	0	0	1	0	1	0	0	1	0	0	0	0	0	0	0	0	0	0	0	0	0	1
9232	PTTG1	4	3	0	0.3	0	0	1	1	1	0	0	0	0	0	0	0	0	0	0	0	1	0	0	0	0	0
5983	RFC3	4	4	0	0.4	0	0	1	0	1	0	0	1	0	0	0	0	0	0	0	0	0	0	0	0	0	1
54069	MIS18A	4	1	1	0.1	0.166667	0	1	0	0	0	0	0	0	1	0	0	0	0	0	1	1	0	0	0	0	0
5198	PFAS	4	2	1	0.2	0.166667	0	1	0	1	0	0	0	0	1	0	0	0	0	0	1	0	0	0	0	0	0
1525	CXADR	4	4	0	0.4	0	0	1	0	1	0	0	0	0	0	0	1	0	0	0	0	0	0	0	0	0	1
51053	GMNN	4	4	0	0.4	0	0	1	0	1	0	0	1	0	0	0	0	0	0	0	0	0	0	0	0	0	1
5015	OTX2	4	4	0	0.4	0	0	1	0	1	0	0	1	0	0	0	0	0	0	0	0	0	0	0	0	0	1
83879	CDCA7	4	3	1	0.3	0.166667	0	1	0	1	0	0	1	1	0	0	0	0	0	0	0	0	0	0	0	0	0
8932	MBD2	4	4	0	0.4	0	0	1	0	1	0	0	0	0	0	0	1	0	0	0	0	0	0	0	0	0	1
2150	F2RL1	4	2	2	0.2	0.333333	0	1	0	1	0	0	0	0	1	1	0	0	0	0	0	0	0	0	0	0	0
892	CCNC	4	4	0	0.4	0	0	1	1	1	0	0	1	0	0	0	0	0	0	0	0	0	0	0	0	0	0
871	SERPINH1	4	4	0	0.4	0	0	1	1	1	0	0	1	0	0	0	0	0	0	0	0	0	0	0	0	0	0
51203	NUSAP1	4	2	0	0.2	0	0	1	0	0	0	0	1	0	0	0	0	0	0	0	1	1	0	0	0	0	0
3148	HMGB2	4	3	0	0.3	0	0	1	1	0	0	0	1	0	0	0	0	0	0	0	0	1	0	0	0	0	0
51514	DTL	4	3	0	0.3	0	0	1	0	1	0	0	1	0	0	0	0	0	0	0	0	1	0	0	0	0	0
3066	HDAC2	4	3	0	0.3	0	0	1	1	0	0	0	0	0	0	0	0	0	0	0	1	0	0	0	0	0	1
93	ACVR2B	4	3	0	0.3	0	0	1	0	1	0	1	0	0	0	0	0	0	0	0	0	0	0	1	0	0	0
6119	RPA3	4	4	0	0.4	0	0	1	0	1	0	0	1	0	0	0	0	0	0	0	0	0	0	0	0	0	1
9493	KIF23	4	2	0	0.2	0	0	1	0	0	0	0	1	0	0	0	0	0	0	0	1	1	0	0	0	0	0
4675	NAP1L3	4	1	3	0.1	0.5	0	1	0	0	0	0	0	1	1	1	0	0	0	0	0	0	0	0	0	0	0
641	BLM	4	4	0	0.4	0	0	1	0	0	0	0	1	0	0	0	0	0	0	0	0	0	1	0	0	0	1
22974	TPX2	4	3	0	0.3	0	0	1	1	0	0	0	0	0	0	0	0	0	0	0	0	1	0	0	0	0	1
4232	MEST	4	1	3	0.1	0.5	0	1	0	0	0	0	0	1	1	1	0	0	0	0	0	0	0	0	0	0	0
3615	IMPDH2	4	2	2	0.2	0.333333	0	1	1	0	0	0	0	0	1	1	0	0	0	0	0	0	0	0	0	0	0
400451	FAM174B	4	3	1	0.3	0.166667	0	1	0	1	0	0	0	0	1	0	0	0	0	0	0	0	1	0	0	0	0
7137	TNNI3	4	4	0	0.4	0	0	1	0	1	0	0	0	0	0	0	1	0	0	0	0	0	0	0	0	0	1
4605	MYBL2	4	4	0	0.4	0	0	1	0	1	0	0	1	0	0	0	0	0	0	0	0	0	0	0	0	0	1
4609	MYC	4	3	0	0.3	0	0	1	0	0	0	0	1	0	0	0	0	0	0	0	0	0	0	1	0	0	1
1164	CKS2	4	3	0	0.3	0	0	1	0	0	0	0	1	0	0	0	0	0	0	0	0	1	0	0	0	0	1
115106	HAUS1	4	3	0	0.3	0	0	1	0	0	0	0	1	0	0	0	0	0	0	0	1	0	0	0	0	0	1
328	APEX1	4	3	1	0.3	0.166667	0	1	0	0	0	0	1	0	1	0	0	0	0	0	0	0	0	0	0	0	1
23658	LSM5	4	3	1	0.3	0.166667	0	1	0	0	0	0	1	0	1	0	0	0	0	0	0	0	0	0	0	0	1
6223	RPS19	4	3	1	0.3	0.166667	0	1	0	1	0	0	1	0	0	0	0	1	0	0	0	0	0	0	0	0	0
10112	KIF20A	4	2	0	0.2	0	0	1	0	0	0	0	1	0	0	0	0	0	0	0	1	1	0	0	0	0	0
3336	HSPE1	4	4	0	0.4	0	0	1	0	1	0	0	1	0	0	0	0	0	0	0	0	0	0	0	0	0	1
23016	EXOSC7	4	4	0	0.4	0	0	1	0	1	0	0	1	0	0	0	0	0	0	0	0	0	0	0	0	0	1
501	ALDH7A1	4	3	1	0.3	0.166667	0	1	0	1	0	0	1	0	1	0	0	0	0	0	0	0	0	0	0	0	0
55930	MYO5C	4	1	3	0.1	0.5	0	1	0	0	0	0	0	1	1	1	0	0	0	0	0	0	0	0	0	0	0
8317	CDC7	4	3	0	0.3	0	0	1	0	0	0	0	1	0	0	0	0	0	0	0	0	1	0	0	0	0	1
5111	PCNA	4	4	0	0.4	0	0	1	0	1	0	0	1	0	0	0	0	0	0	0	0	0	0	0	0	0	1
3094	HINT1	4	2	2	0.2	0.333333	0	0	0	1	0	0	0	0	1	0	0	1	0	0	0	0	1	0	0	0	0
2982	GUCY1A3	4	1	3	0.1	0.5	0	0	0	0	0	0	0	1	1	1	0	0	0	0	0	0	1	0	0	0	0
6888	TALDO1	4	2	1	0.2	0.166667	0	0	0	1	0	0	0	0	0	0	0	1	0	0	0	1	1	0	0	0	0
11030	RBPMS	4	2	2	0.2	0.333333	0	0	0	1	0	0	0	0	1	1	0	0	0	0	0	0	0	0	0	0	1
79070	KDELC1	4	1	2	0.1	0.333333	0	0	0	1	0	0	0	0	1	1	0	0	0	0	1	0	0	0	0	0	0
4883	NPR3	4	0	3	0	0.5	0	0	0	0	0	0	0	1	1	1	0	0	0	0	1	0	0	0	0	0	0
4211	MEIS1	4	0	3	0	0.5	0	0	0	0	0	0	0	1	1	1	0	0	0	0	0	0	0	1	0	0	0
9315	NREP	4	0	3	0	0.5	0	0	0	0	0	0	0	0	1	1	0	1	0	0	1	0	0	0	0	0	0
1063	CENPF	3	1	0	0.1	0	0	1	0	0	0	0	0	0	0	0	0	0	0	0	0	1	0	0	0	1	0
9314	KLF4	3	0	0	0	0	0	0	0	0	0	0	0	0	0	0	0	0	0	0	0	0	0	1	1	1	0
23369	PUM2	3	1	1	0.1	0.166667	0	0	0	0	0	1	0	0	0	0	0	1	0	0	0	0	0	0	0	1	0
6599	SMARCC1	3	1	1	0.1	0.166667	0	0	0	0	0	0	0	0	1	0	0	0	0	0	0	0	0	0	0	1	1
6934	TCF7L2	3	0	2	0	0.333333	0	0	0	0	0	0	0	0	1	0	0	1	0	0	0	0	0	0	0	1	0
80312	TET1	3	1	0	0.1	0	0	1	0	0	0	0	0	0	0	0	0	0	0	0	1	0	0	0	0	1	0
84101	USP44	3	2	0	0.2	0	0	1	0	0	0	1	0	0	0	0	0	0	0	0	0	0	0	0	0	1	0
79624	C6orf211	3	3	0	0.3	0	1	1	0	1	0	0	0	0	0	0	0	0	0	0	0	0	0	0	0	0	0
3692	EIF6	3	2	1	0.2	0.166667	1	0	0	0	0	0	1	0	1	0	0	0	0	0	0	0	0	0	0	0	0
55655	NLRP2	3	3	0	0.3	0	1	1	0	1	0	0	0	0	0	0	0	0	0	0	0	0	0	0	0	0	0
10635	RAD51AP1	3	2	0	0.2	0	1	1	0	0	0	0	0	0	0	0	0	0	0	0	0	1	0	0	0	0	0
51385	ZNF589	3	3	0	0.3	0	1	1	0	1	0	0	0	0	0	0	0	0	0	0	0	0	0	0	0	0	0
10344	CCL26	3	2	0	0.2	0	1	1	0	0	0	0	0	0	0	0	0	0	0	0	1	0	0	0	0	0	0
11040	PIM2	3	3	0	0.3	0	1	1	0	0	0	0	0	0	0	0	0	0	0	0	0	0	1	0	0	0	0
2288	FKBP4	3	2	1	0.2	0.166667	1	0	0	1	0	0	0	0	1	0	0	0	0	0	0	0	0	0	0	0	0
4495	MT1G	3	2	1	0.2	0.166667	1	0	0	0	0	0	0	0	0	0	0	1	0	0	0	0	0	0	0	0	1
4706	NDUFAB1	3	3	0	0.3	0	1	0	0	1	0	0	1	0	0	0	0	0	0	0	0	0	0	0	0	0	0
51253	MRPL37	3	3	0	0.3	0	1	1	0	0	0	0	1	0	0	0	0	0	0	0	0	0	0	0	0	0	0
51805	COQ3	3	3	0	0.3	0	1	1	0	0	0	0	1	0	0	0	0	0	0	0	0	0	0	0	0	0	0
6128	RPL6	3	3	0	0.3	0	1	1	1	0	0	0	0	0	0	0	0	0	0	0	0	0	0	0	0	0	0
7004	TEAD4	3	3	0	0.3	0	1	1	0	1	0	0	0	0	0	0	0	0	0	0	0	0	0	0	0	0	0
7112	TMPO	3	3	0	0.3	0	1	1	0	0	0	0	0	0	0	0	0	0	0	0	0	0	0	0	0	0	1
7388	UQCRH	3	3	0	0.3	0	1	1	0	0	0	0	1	0	0	0	0	0	0	0	0	0	0	0	0	0	0
7447	VSNL1	3	3	0	0.3	0	1	1	0	0	1	0	0	0	0	0	0	0	0	0	0	0	0	0	0	0	0
7514	XPO1	3	3	0	0.3	0	1	1	0	0	0	0	1	0	0	0	0	0	0	0	0	0	0	0	0	0	0
793	CALB1	3	3	0	0.3	0	1	1	0	1	0	0	0	0	0	0	0	0	0	0	0	0	0	0	0	0	0
8463	TEAD2	3	3	0	0.3	0	1	0	0	1	0	0	1	0	0	0	0	0	0	0	0	0	0	0	0	0	0
875	CBS	3	3	0	0.3	0	1	1	0	1	0	0	0	0	0	0	0	0	0	0	0	0	0	0	0	0	0
928	CD9	3	3	0	0.3	0	1	1	0	0	0	1	0	0	0	0	0	0	0	0	0	0	0	0	0	0	0
6638	SNRPN	3	3	0	0.3	0	0	1	0	1	0	0	0	0	0	0	0	0	0	0	0	0	0	0	0	0	1
699	BUB1	3	2	0	0.2	0	0	1	0	0	0	0	1	0	0	0	0	0	0	0	0	1	0	0	0	0	0
3070	HELLS	3	3	0	0.3	0	0	1	0	1	0	0	1	0	0	0	0	0	0	0	0	0	0	0	0	0	0
1592	CYP26A1	3	3	0	0.3	0	0	1	1	0	0	0	0	0	0	0	1	0	0	0	0	0	0	0	0	0	0
4174	MCM5	3	3	0	0.3	0	0	1	0	0	0	0	1	0	0	0	0	0	0	0	0	0	0	0	0	0	1
7360	UGP2	3	3	0	0.3	0	0	1	0	1	0	1	0	0	0	0	0	0	0	0	0	0	0	0	0	0	0
79960	JADE1	3	3	0	0.3	0	0	1	1	1	0	0	0	0	0	0	0	0	0	0	0	0	0	0	0	0	0
7374	UNG	3	2	1	0.2	0.166667	0	1	0	0	0	0	0	0	1	0	0	0	0	0	0	0	0	0	0	0	1
58	ACTA1	3	3	0	0.3	0	0	1	0	0	0	0	0	0	0	0	0	0	0	0	0	0	1	0	0	0	1
5803	PTPRZ1	3	2	1	0.2	0.166667	0	1	0	1	0	0	0	0	0	0	0	0	0	1	0	0	0	0	0	0	0
100133941	CD24	3	3	0	0.3	0	0	1	0	1	0	1	0	0	0	0	0	0	0	0	0	0	0	0	0	0	0
58516	FAM60A	3	3	0	0.3	0	0	1	0	1	0	0	1	0	0	0	0	0	0	0	0	0	0	0	0	0	0
3149	HMGB3	3	2	1	0.2	0.166667	0	1	0	1	0	0	0	0	1	0	0	0	0	0	0	0	0	0	0	0	0
5366	PMAIP1	3	3	0	0.3	0	0	1	0	1	0	0	0	0	0	0	0	0	0	0	0	0	0	0	0	0	1
5427	POLE2	3	2	0	0.2	0	0	1	0	0	0	0	1	0	0	0	0	0	0	0	1	0	0	0	0	0	0
2115	ETV1	3	2	1	0.2	0.166667	0	1	0	1	0	0	0	0	0	0	0	0	0	1	0	0	0	0	0	0	0
3932	LCK	3	3	0	0.3	0	0	1	0	0	0	0	0	0	0	0	1	0	0	0	0	0	0	0	0	0	1
79071	ELOVL6	3	3	0	0.3	0	0	1	1	0	0	0	1	0	0	0	0	0	0	0	0	0	0	0	0	0	0
113130	CDCA5	3	3	0	0.3	0	0	1	0	1	0	0	1	0	0	0	0	0	0	0	0	0	0	0	0	0	0
2041	EPHA1	3	2	0	0.2	0	0	1	0	1	0	0	0	0	0	0	0	0	0	0	0	0	0	0	1	0	0
7044	LEFTY2	3	3	0	0.3	0	0	1	0	1	0	0	0	0	0	0	1	0	0	0	0	0	0	0	0	0	0
5058	PAK1	3	3	0	0.3	0	0	1	0	1	0	0	0	0	0	0	0	0	0	0	0	0	0	0	0	0	1
84891	ZSCAN10	3	2	0	0.2	0	0	1	0	0	0	0	0	0	0	0	0	0	0	0	0	0	1	0	1	0	0
10053	AP1M2	3	3	0	0.3	0	0	1	0	1	0	0	0	0	0	0	1	0	0	0	0	0	0	0	0	0	0
1111	CHEK1	3	3	0	0.3	0	0	1	0	0	0	0	1	0	0	0	0	0	0	0	0	0	0	0	0	0	1
10434	LYPLA1	3	3	0	0.3	0	0	1	0	1	0	0	1	0	0	0	0	0	0	0	0	0	0	0	0	0	0
115572	FAM46B	3	3	0	0.3	0	0	1	0	1	0	1	0	0	0	0	0	0	0	0	0	0	0	0	0	0	0
991	CDC20	3	2	0	0.2	0	0	1	0	0	0	0	1	0	0	0	0	0	0	0	0	1	0	0	0	0	0
4521	NUDT1	3	3	0	0.3	0	0	1	0	1	0	0	0	0	0	0	0	0	0	0	0	0	0	0	0	0	1
9603	NFE2L3	3	2	1	0.2	0.166667	0	1	0	1	0	0	0	0	1	0	0	0	0	0	0	0	0	0	0	0	0
10439	OLFM1	3	3	0	0.3	0	0	1	0	1	0	0	0	0	0	0	0	0	0	0	0	0	1	0	0	0	0
990	CDC6	3	3	0	0.3	0	0	1	0	1	0	0	1	0	0	0	0	0	0	0	0	0	0	0	0	0	0
83439	TCF7L1	3	3	0	0.3	0	0	1	0	1	0	0	1	0	0	0	0	0	0	0	0	0	0	0	0	0	0
6241	RRM2	3	2	0	0.2	0	0	1	0	0	0	0	1	0	0	0	0	0	0	0	0	1	0	0	0	0	0
5631	PRPS1	3	3	0	0.3	0	0	1	0	1	0	0	1	0	0	0	0	0	0	0	0	0	0	0	0	0	0
3161	HMMR	3	2	0	0.2	0	0	1	0	0	0	0	0	0	0	0	0	0	0	0	0	1	0	0	0	0	1
6626	SNRPA	3	3	0	0.3	0	0	1	0	0	0	0	1	0	0	0	0	0	0	0	0	0	0	0	0	0	1
5984	RFC4	3	2	0	0.2	0	0	1	0	0	0	0	0	0	0	0	0	0	0	0	0	1	0	0	0	0	1
6337	SCNN1A	3	3	0	0.3	0	0	1	0	1	0	0	0	0	0	0	1	0	0	0	0	0	0	0	0	0	0
26047	CNTNAP2	3	3	0	0.3	0	0	1	0	1	0	0	0	0	0	0	1	0	0	0	0	0	0	0	0	0	0
993	CDC25A	3	2	0	0.2	0	0	1	0	1	0	0	0	0	0	0	0	0	0	0	1	0	0	0	0	0	0
57122	NUP107	3	3	0	0.3	0	0	1	0	0	0	0	1	0	0	0	0	0	0	0	0	0	1	0	0	0	0
7280	TUBB2A	3	2	1	0.2	0.166667	0	1	0	1	0	0	0	0	0	0	0	1	0	0	0	0	0	0	0	0	0
4869	NPM1	3	3	0	0.3	0	0	1	1	0	0	0	0	0	0	0	0	0	0	0	0	0	0	0	0	0	1
10036	CHAF1A	3	3	0	0.3	0	0	1	0	0	0	0	1	0	0	0	0	0	0	0	0	0	0	0	0	0	1
5865	RAB3B	3	2	0	0.2	0	0	1	0	1	0	0	0	0	0	0	0	0	0	0	1	0	0	0	0	0	0
55120	FANCL	3	1	2	0.1	0.333333	0	1	0	0	0	0	0	0	1	1	0	0	0	0	0	0	0	0	0	0	0
57685	CACHD1	3	3	0	0.3	0	0	1	1	1	0	0	0	0	0	0	0	0	0	0	0	0	0	0	0	0	0
93099	DMKN	3	3	0	0.3	0	0	1	0	1	0	1	0	0	0	0	0	0	0	0	0	0	0	0	0	0	0
23397	NCAPH	3	2	0	0.2	0	0	1	0	0	0	0	1	0	0	0	0	0	0	0	0	1	0	0	0	0	0
55388	MCM10	3	2	0	0.2	0	0	1	0	0	0	0	0	0	0	0	0	0	0	0	1	0	0	0	0	0	1
79075	DSCC1	3	2	0	0.2	0	0	1	0	0	0	0	0	0	0	0	0	0	0	0	0	1	0	0	0	0	1
57486	NLN	3	3	0	0.3	0	0	1	0	1	0	0	1	0	0	0	0	0	0	0	0	0	0	0	0	0	0
2237	FEN1	3	2	0	0.2	0	0	1	0	0	0	0	0	0	0	0	0	0	0	0	0	1	0	0	0	0	1
9282	MED14	3	3	0	0.3	0	0	1	0	1	0	0	0	0	0	0	0	0	0	0	0	0	1	0	0	0	0
54821	ERCC6L	3	3	0	0.3	0	0	1	0	1	0	0	1	0	0	0	0	0	0	0	0	0	0	0	0	0	0
5557	PRIM1	3	2	0	0.2	0	0	1	0	0	0	0	1	0	0	0	0	0	0	0	1	0	0	0	0	0	0
8607	RUVBL1	3	3	0	0.3	0	0	1	0	0	0	0	1	0	0	0	0	0	0	0	0	0	0	0	0	0	1
4345	CD200	3	2	1	0.2	0.166667	0	1	0	1	0	0	0	0	1	0	0	0	0	0	0	0	0	0	0	0	0
2596	GAP43	3	2	1	0.2	0.166667	0	1	0	1	0	0	0	0	0	0	0	0	0	1	0	0	0	0	0	0	0
7272	TTK	3	2	0	0.2	0	0	1	0	0	0	0	1	0	0	0	0	0	0	0	0	1	0	0	0	0	0
10642	IGF2BP1	3	2	0	0.2	0	0	1	0	1	0	0	0	0	0	0	0	0	0	0	1	0	0	0	0	0	0
65003	MRPL11	3	3	0	0.3	0	0	1	0	1	0	0	1	0	0	0	0	0	0	0	0	0	0	0	0	0	0
1062	CENPE	3	2	0	0.2	0	0	1	0	0	0	0	0	0	0	0	0	0	0	0	1	0	0	0	0	0	1
1466	CSRP2	3	3	0	0.3	0	0	1	0	1	0	0	1	0	0	0	0	0	0	0	0	0	0	0	0	0	0
1809	DPYSL3	3	1	2	0.1	0.333333	0	1	0	0	0	0	0	0	1	1	0	0	0	0	0	0	0	0	0	0	0
10630	PDPN	3	3	0	0.3	0	0	1	0	1	0	0	1	0	0	0	0	0	0	0	0	0	0	0	0	0	0
7368	UGT8	3	3	0	0.3	0	0	1	0	0	0	1	0	0	0	0	1	0	0	0	0	0	0	0	0	0	0
2264	FGFR4	3	2	0	0.2	0	0	1	0	1	0	0	0	0	0	0	0	0	0	0	0	0	0	1	0	0	0
5683	PSMA2	3	3	0	0.3	0	0	1	1	1	0	0	0	0	0	0	0	0	0	0	0	0	0	0	0	0	0
55608	ANKRD10	3	1	2	0.1	0.333333	0	1	0	0	0	0	0	1	0	0	0	1	0	0	0	0	0	0	0	0	0
5308	PITX2	3	2	1	0.2	0.166667	0	1	1	0	0	0	0	0	0	0	0	0	1	0	0	0	0	0	0	0	0
4885	NPTX2	3	1	2	0.1	0.333333	0	1	0	0	0	0	0	0	1	1	0	0	0	0	0	0	0	0	0	0	0
51747	LUC7L3	3	3	0	0.3	0	0	1	0	0	0	0	0	0	0	0	0	0	0	0	0	0	1	0	0	0	1
9071	CLDN10	3	2	1	0.2	0.166667	0	1	0	1	0	0	0	0	1	0	0	0	0	0	0	0	0	0	0	0	0
81610	FAM83D	3	3	0	0.3	0	0	1	1	1	0	0	0	0	0	0	0	0	0	0	0	0	0	0	0	0	0
6152	RPL24	3	2	1	0.2	0.166667	0	1	1	0	0	0	0	0	0	0	0	1	0	0	0	0	0	0	0	0	0
6182	MRPL12	3	3	0	0.3	0	0	1	0	1	0	0	1	0	0	0	0	0	0	0	0	0	0	0	0	0	0
90861	HN1L	3	2	1	0.2	0.166667	0	1	0	1	0	0	0	0	1	0	0	0	0	0	0	0	0	0	0	0	0
7594	ZNF43	3	3	0	0.3	0	0	1	1	0	0	0	0	0	0	0	0	0	0	0	0	0	1	0	0	0	0
3843	IPO5	3	1	1	0.1	0.166667	0	1	0	0	0	0	0	0	1	0	0	0	0	0	1	0	0	0	0	0	0
10403	NDC80	3	2	0	0.2	0	0	1	0	0	0	0	1	0	0	0	0	0	0	0	1	0	0	0	0	0	0
1620	BRINP1	3	2	0	0.2	0	0	1	0	1	0	0	0	0	0	0	0	0	0	0	1	0	0	0	0	0	0
7443	VRK1	3	3	0	0.3	0	0	1	0	0	1	0	1	0	0	0	0	0	0	0	0	0	0	0	0	0	0
54874	FNBP1L	3	2	1	0.2	0.166667	0	1	0	1	0	0	0	0	1	0	0	0	0	0	0	0	0	0	0	0	0
7345	UCHL1	3	2	1	0.2	0.166667	0	1	0	1	0	0	0	0	1	0	0	0	0	0	0	0	0	0	0	0	0
4691	NCL	3	3	0	0.3	0	0	1	0	0	0	0	1	0	0	0	0	0	0	0	0	0	0	0	0	0	1
10615	SPAG5	3	3	0	0.3	0	0	1	0	0	0	0	1	0	0	0	0	0	0	0	0	0	0	0	0	0	1
10592	SMC2	3	2	0	0.2	0	0	1	0	0	0	0	1	0	0	0	0	0	0	0	0	1	0	0	0	0	0
3192	HNRNPU	3	3	0	0.3	0	0	1	0	1	0	0	0	0	0	0	0	0	0	0	0	0	1	0	0	0	0
9079	LDB2	3	2	1	0.2	0.166667	0	1	0	0	0	0	0	0	1	0	0	0	0	0	0	0	1	0	0	0	0
5311	PKD2	3	1	2	0.1	0.333333	0	1	0	0	0	0	0	0	1	1	0	0	0	0	0	0	0	0	0	0	0
2135	EXTL2	3	1	2	0.1	0.333333	0	1	0	0	0	0	0	0	1	1	0	0	0	0	0	0	0	0	0	0	0
3875	KRT18	3	2	1	0.2	0.166667	0	1	1	0	0	0	0	0	0	1	0	0	0	0	0	0	0	0	0	0	0
7168	TPM1	3	3	0	0.3	0	0	1	0	1	0	0	0	0	0	0	0	0	0	0	0	0	1	0	0	0	0
220108	FAM124A	3	3	0	0.3	0	0	1	0	1	0	1	0	0	0	0	0	0	0	0	0	0	0	0	0	0	0
7083	TK1	3	3	0	0.3	0	0	1	1	0	0	0	0	0	0	0	0	0	0	0	0	0	0	0	0	0	1
65997	RASL11B	3	3	0	0.3	0	0	1	0	1	0	0	0	0	0	0	0	0	0	0	0	0	0	0	0	0	1
51187	RSL24D1	3	2	1	0.2	0.166667	0	1	1	0	0	0	0	0	1	0	0	0	0	0	0	0	0	0	0	0	0
4830	NME1	3	2	1	0.2	0.166667	0	1	0	0	0	0	0	0	1	0	0	0	0	0	0	0	0	0	0	0	1
2261	FGFR3	3	2	0	0.2	0	0	1	0	1	0	0	0	0	0	0	0	0	0	0	0	0	0	1	0	0	0
5684	PSMA3	3	3	0	0.3	0	0	1	1	0	0	0	0	0	0	0	0	0	0	0	0	0	0	0	0	0	1
7050	TGIF1	3	3	0	0.3	0	0	1	0	0	0	0	1	0	0	0	0	0	0	0	0	0	0	0	0	0	1
11335	CBX3	3	2	1	0.2	0.166667	0	1	0	0	0	0	1	0	0	0	0	1	0	0	0	0	0	0	0	0	0
6627	SNRPA1	3	2	0	0.2	0	0	1	0	0	0	0	1	0	0	0	0	0	0	0	0	1	0	0	0	0	0
813	CALU	3	3	0	0.3	0	0	1	1	1	0	0	0	0	0	0	0	0	0	0	0	0	0	0	0	0	0
4001	LMNB1	3	3	0	0.3	0	0	1	0	1	0	0	1	0	0	0	0	0	0	0	0	0	0	0	0	0	0
1978	EIF4EBP1	3	3	0	0.3	0	0	1	0	1	0	0	1	0	0	0	0	0	0	0	0	0	0	0	0	0	0
23493	HEY2	3	3	0	0.3	0	0	1	0	1	0	0	0	0	0	0	1	0	0	0	0	0	0	0	0	0	0
5888	RAD51	3	2	0	0.2	0	0	1	0	0	0	0	0	0	0	0	0	0	0	0	0	1	0	0	0	0	1
55505	NOP10	3	3	0	0.3	0	0	1	0	1	0	0	1	0	0	0	0	0	0	0	0	0	0	0	0	0	0
3613	IMPA2	3	2	1	0.2	0.166667	0	1	0	1	0	0	0	0	1	0	0	0	0	0	0	0	0	0	0	0	0
4651	MYO10	3	3	0	0.3	0	0	1	0	1	1	0	0	0	0	0	0	0	0	0	0	0	0	0	0	0	0
7153	TOP2A	3	2	0	0.2	0	0	1	0	0	0	0	1	0	0	0	0	0	0	0	0	1	0	0	0	0	0
6502	SKP2	3	1	0	0.1	0	0	1	0	0	0	0	0	0	0	0	0	0	0	0	1	1	0	0	0	0	0
7001	PRDX2	3	2	1	0.2	0.166667	0	1	0	1	0	0	0	0	0	0	0	1	0	0	0	0	0	0	0	0	0
5424	POLD1	3	3	0	0.3	0	0	1	0	0	0	0	1	0	0	0	0	0	0	0	0	0	0	0	0	0	1
26049	FAM169A	3	2	1	0.2	0.166667	0	1	0	1	0	0	0	0	1	0	0	0	0	0	0	0	0	0	0	0	0
8508	NIPSNAP1	3	2	1	0.2	0.166667	0	1	0	0	0	0	1	0	1	0	0	0	0	0	0	0	0	0	0	0	0
581	BAX	3	3	0	0.3	0	0	1	0	1	0	0	1	0	0	0	0	0	0	0	0	0	0	0	0	0	0
943	TNFRSF8	3	3	0	0.3	0	0	1	0	1	0	0	0	0	0	0	0	0	0	0	0	0	0	0	0	0	1
3313	HSPA9	3	3	0	0.3	0	0	1	0	0	0	0	1	0	0	0	0	0	0	0	0	0	0	0	0	0	1
1058	CENPA	3	2	0	0.2	0	0	1	0	0	0	0	0	0	0	0	0	0	0	0	0	1	1	0	0	0	0
51520	LARS	3	3	0	0.3	0	0	1	0	1	0	0	0	0	0	0	0	0	0	0	0	0	1	0	0	0	0
51690	LSM7	3	3	0	0.3	0	0	1	0	1	0	0	0	0	0	0	0	0	0	0	0	0	0	0	0	0	1
5074	PAWR	3	1	2	0.1	0.333333	0	1	0	0	0	0	0	0	1	1	0	0	0	0	0	0	0	0	0	0	0
51728	POLR3K	3	3	0	0.3	0	0	1	0	1	0	0	1	0	0	0	0	0	0	0	0	0	0	0	0	0	0
2886	GRB7	3	3	0	0.3	0	0	1	0	1	0	0	0	0	0	0	0	0	0	0	0	0	0	0	0	0	1
8540	AGPS	3	2	1	0.2	0.166667	0	1	0	0	0	0	0	0	1	0	0	0	0	0	0	0	1	0	0	0	0
4673	NAP1L1	3	3	0	0.3	0	0	1	0	1	0	0	1	0	0	0	0	0	0	0	0	0	0	0	0	0	0
2653	GCSH	3	2	1	0.2	0.166667	0	1	0	1	0	0	0	0	1	0	0	0	0	0	0	0	0	0	0	0	0
636	BICD1	3	2	1	0.2	0.166667	0	1	0	1	0	0	0	0	1	0	0	0	0	0	0	0	0	0	0	0	0
51182	HSPA14	3	3	0	0.3	0	0	1	0	0	0	0	1	0	0	0	0	0	0	0	0	0	0	0	0	0	1
80143	SIKE1	3	2	1	0.2	0.166667	0	1	0	1	0	0	0	0	1	0	0	0	0	0	0	0	0	0	0	0	0
167227	DCP2	3	3	0	0.3	0	0	1	0	1	0	0	0	0	0	0	1	0	0	0	0	0	0	0	0	0	0
284565	NBPF15	3	2	1	0.2	0.166667	0	0	0	1	0	0	0	0	0	0	0	1	0	0	0	0	1	0	0	0	0
23677	SH3BP4	3	1	2	0.1	0.333333	0	0	0	0	0	0	0	0	1	1	0	0	0	0	0	0	1	0	0	0	0
2950	GSTP1	3	2	1	0.2	0.166667	0	0	0	1	0	0	0	0	1	0	0	0	0	0	0	0	1	0	0	0	0
11331	PHB2	3	2	1	0.2	0.166667	0	0	0	1	0	0	0	0	1	0	0	0	0	0	0	0	1	0	0	0	0
2632	GBE1	3	1	1	0.1	0.166667	0	0	0	0	0	0	0	0	1	0	0	0	0	0	1	0	1	0	0	0	0
894	CCND2	3	2	1	0.2	0.166667	0	0	0	1	0	0	1	0	1	0	0	0	0	0	0	0	0	0	0	0	0
57460	PPM1H	3	1	2	0.1	0.333333	0	0	0	1	0	0	0	1	1	0	0	0	0	0	0	0	0	0	0	0	0
81618	ITM2C	3	1	2	0.1	0.333333	0	0	0	1	0	0	0	0	1	1	0	0	0	0	0	0	0	0	0	0	0
6659	SOX4	3	1	2	0.1	0.333333	0	0	0	1	0	0	0	0	1	0	0	1	0	0	0	0	0	0	0	0	0
348	APOE	3	2	1	0.2	0.166667	0	0	0	1	0	0	0	0	0	0	0	1	0	0	0	0	0	0	0	0	1
6188	RPS3	3	2	1	0.2	0.166667	0	0	0	1	0	0	1	0	0	0	0	1	0	0	0	0	0	0	0	0	0
125058	TBC1D16	3	1	1	0.1	0.166667	0	0	0	1	0	0	0	0	1	0	0	0	0	0	1	0	0	0	0	0	0
4628	MYH10	3	1	2	0.1	0.333333	0	0	0	1	0	0	0	0	1	1	0	0	0	0	0	0	0	0	0	0	0
4060	LUM	3	1	2	0.1	0.333333	0	0	0	1	0	0	0	0	0	0	0	1	1	0	0	0	0	0	0	0	0
1359	CPA3	3	1	2	0.1	0.333333	0	0	0	1	0	0	0	0	1	1	0	0	0	0	0	0	0	0	0	0	0
60436	TGIF2	3	2	1	0.2	0.166667	0	0	0	1	0	0	1	0	1	0	0	0	0	0	0	0	0	0	0	0	0
10248	POP7	3	3	0	0.3	0	0	0	0	1	0	0	1	0	0	0	0	0	0	0	0	0	0	0	0	0	1
3845	KRAS	3	2	0	0.2	0	0	0	0	1	0	0	1	0	0	0	0	0	0	0	0	0	0	1	0	0	0
3371	TNC	3	1	2	0.1	0.333333	0	0	0	1	0	0	0	0	0	0	0	0	1	1	0	0	0	0	0	0	0
6146	RPL22	3	2	1	0.2	0.166667	0	0	0	1	0	0	1	0	0	0	0	1	0	0	0	0	0	0	0	0	0
27335	EIF3K	3	2	1	0.2	0.166667	0	0	0	1	0	0	1	0	0	0	0	1	0	0	0	0	0	0	0	0	0
5757	PTMA	3	2	1	0.2	0.166667	0	0	0	1	0	0	0	0	0	0	0	1	0	0	0	0	0	0	0	0	1
3921	RPSA	3	2	1	0.2	0.166667	0	0	0	1	0	0	1	0	0	0	0	1	0	0	0	0	0	0	0	0	0
2263	FGFR2	3	2	0	0.2	0	0	0	0	1	0	0	0	0	0	0	1	0	0	0	0	0	0	1	0	0	0
29970	SCHIP1	3	1	2	0.1	0.333333	0	0	0	1	0	0	0	0	1	1	0	0	0	0	0	0	0	0	0	0	0
6774	STAT3	3	1	0	0.1	0	0	0	0	0	0	1	0	0	0	0	0	0	0	0	0	0	0	1	1	0	0
2627	GATA6	3	1	1	0.1	0.166667	0	0	0	0	0	1	0	0	0	0	0	0	1	0	0	0	0	0	1	0	0
128	ADH5	3	1	1	0.1	0.166667	0	0	0	0	0	0	1	0	1	0	0	0	0	0	1	0	0	0	0	0	0
1911	PHC1	3	3	0	0.3	0	0	0	0	0	0	0	1	0	0	0	1	0	0	0	0	0	0	0	0	0	1
3832	KIF11	3	1	0	0.1	0	0	0	0	0	0	0	1	0	0	0	0	0	0	0	1	1	0	0	0	0	0
6632	SNRPD1	3	2	1	0.2	0.166667	0	0	0	0	0	0	1	0	1	0	0	0	0	0	0	0	0	0	0	0	1
6713	SQLE	3	1	2	0.1	0.333333	0	0	0	0	0	0	1	0	1	0	0	1	0	0	0	0	0	0	0	0	0
7205	TRIP6	3	1	2	0.1	0.333333	0	0	0	0	0	0	1	0	1	1	0	0	0	0	0	0	0	0	0	0	0
9133	CCNB2	3	2	0	0.2	0	0	0	0	0	0	0	1	0	0	0	0	0	0	0	0	1	0	0	0	0	1
9319	TRIP13	3	2	0	0.2	0	0	0	0	0	0	0	1	0	0	0	0	0	0	0	0	1	0	0	0	0	1
10799	RPP40	3	2	1	0.2	0.166667	0	0	0	0	0	0	1	0	1	0	0	0	0	0	0	0	0	0	0	0	1
284	ANGPT1	3	0	3	0	0.5	0	0	0	0	0	0	0	1	1	1	0	0	0	0	0	0	0	0	0	0	0
9331	B4GALT6	3	0	3	0	0.5	0	0	0	0	0	0	0	1	1	1	0	0	0	0	0	0	0	0	0	0	0
79870	BAALC	3	0	3	0	0.5	0	0	0	0	0	0	0	1	1	1	0	0	0	0	0	0	0	0	0	0	0
54836	BSPRY	3	0	3	0	0.5	0	0	0	0	0	0	0	1	1	1	0	0	0	0	0	0	0	0	0	0	0
1393	CRHBP	3	0	3	0	0.5	0	0	0	0	0	0	0	1	1	1	0	0	0	0	0	0	0	0	0	0	0
64798	DEPTOR	3	0	3	0	0.5	0	0	0	0	0	0	0	1	1	1	0	0	0	0	0	0	0	0	0	0	0
79667	KLF3-AS1	3	0	3	0	0.5	0	0	0	0	0	0	0	1	1	1	0	0	0	0	0	0	0	0	0	0	0
2322	FLT3	3	0	3	0	0.5	0	0	0	0	0	0	0	1	1	1	0	0	0	0	0	0	0	0	0	0	0
2624	GATA2	3	0	3	0	0.5	0	0	0	0	0	0	0	1	1	1	0	0	0	0	0	0	0	0	0	0	0
3131	HLF	3	0	3	0	0.5	0	0	0	0	0	0	0	1	1	1	0	0	0	0	0	0	0	0	0	0	0
3205	HOXA9	3	0	3	0	0.5	0	0	0	0	0	0	0	1	1	1	0	0	0	0	0	0	0	0	0	0	0
3543	IGLL1	3	0	3	0	0.5	0	0	0	0	0	0	0	1	1	1	0	0	0	0	0	0	0	0	0	0	0
9834	KIAA0125	3	0	3	0	0.5	0	0	0	0	0	0	0	1	1	1	0	0	0	0	0	0	0	0	0	0	0
4300	MLLT3	3	0	3	0	0.5	0	0	0	0	0	0	0	1	1	1	0	0	0	0	0	0	0	0	0	0	0
4352	MPL	3	0	3	0	0.5	0	0	0	0	0	0	0	1	1	1	0	0	0	0	0	0	0	0	0	0	0
27306	HPGDS	3	0	3	0	0.5	0	0	0	0	0	0	0	1	1	1	0	0	0	0	0	0	0	0	0	0	0
8835	SOCS2	3	0	3	0	0.5	0	0	0	0	0	0	0	1	1	1	0	0	0	0	0	0	0	0	0	0	0
6691	SPINK2	3	0	3	0	0.5	0	0	0	0	0	0	0	1	1	1	0	0	0	0	0	0	0	0	0	0	0
23635	SSBP2	3	0	3	0	0.5	0	0	0	0	0	0	0	1	1	1	0	0	0	0	0	0	0	0	0	0	0
2273	FHL1	3	0	3	0	0.5	0	0	0	0	0	0	0	0	1	1	0	1	0	0	0	0	0	0	0	0	0
57820	CCNB1IP1	3	1	2	0.1	0.333333	0	0	0	0	0	0	0	0	1	1	1	0	0	0	0	0	0	0	0	0	0
8091	HMGA2	3	0	2	0	0.333333	0	0	0	0	0	0	0	0	1	1	0	0	0	0	1	0	0	0	0	0	0
51412	ACTL6B	2	1	0	0.1	0	0	0	0	0	0	0	0	0	0	0	0	0	0	0	0	0	1	0	0	1	0
54880	BCOR	2	1	0	0.1	0	0	1	0	0	0	0	0	0	0	0	0	0	0	0	0	0	0	0	0	1	0
1230	CCR1	2	0	0	0	0	0	0	0	0	0	0	0	0	0	0	0	0	0	0	1	0	0	0	0	1	0
64866	CDCP1	2	0	1	0	0.166667	0	0	0	0	0	0	0	0	1	0	0	0	0	0	0	0	0	0	0	1	0
1105	CHD1	2	1	0	0.1	0	0	1	0	0	0	0	0	0	0	0	0	0	0	0	0	0	0	0	0	1	0
8788	DLK1	2	0	1	0	0.166667	0	0	0	0	0	0	0	1	0	0	0	0	0	0	0	0	0	0	0	1	0
4303	FOXO4	2	1	0	0.1	0	0	0	0	0	0	0	0	0	0	0	0	0	0	0	0	0	0	0	0	1	1
2823	GPM6A	2	0	1	0	0.166667	0	0	0	0	0	0	0	0	0	0	0	0	0	1	0	0	0	0	0	1	0
2932	GSK3B	2	0	0	0	0	0	0	0	0	0	0	0	0	0	0	0	0	0	0	0	0	0	1	0	1	0
23526	HMHA1	2	1	0	0.1	0	0	1	0	0	0	0	0	0	0	0	0	0	0	0	0	0	0	0	0	1	0
4254	KITLG	2	0	1	0	0.166667	0	0	0	0	0	0	0	0	0	0	0	1	0	0	0	0	0	0	0	1	0
3872	KRT17	2	0	1	0	0.166667	0	0	0	0	0	0	0	0	0	0	0	1	0	0	0	0	0	0	0	1	0
55366	LGR4	2	1	0	0.1	0	0	1	0	0	0	0	0	0	0	0	0	0	0	0	0	0	0	0	0	1	0
9833	MELK	2	0	0	0	0	0	0	0	0	0	0	0	0	0	0	0	0	0	0	0	1	0	0	0	1	0
92667	MGME1	2	1	0	0.1	0	0	1	0	0	0	0	0	0	0	0	0	0	0	0	0	0	0	0	0	1	0
124540	MSI2	2	0	1	0	0.166667	0	0	0	0	0	0	0	1	0	0	0	0	0	0	0	0	0	0	0	1	0
7703	PCGF2	2	0	0	0	0	0	0	0	0	0	0	0	0	0	0	0	0	0	0	0	0	0	1	0	1	0
5156	PDGFRA	2	0	1	0	0.166667	0	0	0	0	0	0	0	0	0	0	0	0	1	0	0	0	0	0	0	1	0
55274	PHF10	2	1	0	0.1	0	0	0	0	0	0	0	0	0	0	0	0	0	0	0	0	0	0	0	0	1	1
5290	PIK3CA	2	0	0	0	0	0	0	0	0	0	0	0	0	0	0	0	0	0	0	0	0	0	1	0	1	0
5293	PIK3CD	2	0	0	0	0	0	0	0	0	0	0	0	0	0	0	0	0	0	0	0	0	0	1	0	1	0
5717	PSMD11	2	1	0	0.1	0	0	0	0	0	0	0	0	0	0	0	0	0	0	0	0	0	0	0	0	1	1
9698	PUM1	2	1	0	0.1	0	0	0	0	0	0	1	0	0	0	0	0	0	0	0	0	0	0	0	0	1	0
6595	SMARCA2	2	0	1	0	0.166667	0	0	0	0	0	0	0	0	1	0	0	0	0	0	0	0	0	0	0	1	0
6597	SMARCA4	2	0	1	0	0.166667	0	0	0	0	0	0	0	0	0	0	0	1	0	0	0	0	0	0	0	1	0
6601	SMARCC2	2	0	0	0	0	0	0	0	0	0	0	0	0	0	0	0	0	0	0	1	0	0	0	0	1	0
6591	SNAI2	2	0	1	0	0.166667	0	0	0	0	0	0	0	0	0	0	0	0	1	0	0	0	0	0	0	1	0
200734	SPRED2	2	0	1	0	0.166667	0	0	0	0	0	0	0	0	1	0	0	0	0	0	0	0	0	0	0	1	0
51593	SRRT	2	1	0	0.1	0	0	0	0	0	0	0	0	0	0	0	0	0	0	0	0	0	1	0	0	1	0
6789	STK4	2	1	0	0.1	0	0	0	0	0	0	0	0	0	0	0	0	0	0	0	0	0	1	0	0	1	0
54997	TESC	2	1	0	0.1	0	0	1	0	0	0	0	0	0	0	0	0	0	0	0	0	0	0	0	0	1	0
131405	TRIM71	2	1	0	0.1	0	0	0	0	0	0	1	0	0	0	0	0	0	0	0	0	0	0	0	0	1	0
388610	TRNP1	2	1	0	0.1	0	0	0	0	1	0	0	0	0	0	0	0	0	0	0	0	0	0	0	0	1	0
84133	ZNRF3	2	1	0	0.1	0	0	0	0	1	0	0	0	0	0	0	0	0	0	0	0	0	0	0	0	1	0
28982	FLVCR1	2	2	0	0.2	0	1	0	0	1	0	0	0	0	0	0	0	0	0	0	0	0	0	0	0	0	0
2597	GAPDH	2	1	1	0.1	0.166667	1	0	0	0	0	0	0	0	0	0	0	1	0	0	0	0	0	0	0	0	0
54539	NDUFB11	2	2	0	0.2	0	1	0	0	1	0	0	0	0	0	0	0	0	0	0	0	0	0	0	0	0	0
123	PLIN2	2	2	0	0.2	0	1	0	0	0	0	0	0	0	0	0	0	0	0	0	0	0	1	0	0	0	0
55813	UTP6	2	1	0	0.1	0	1	0	0	0	0	0	0	0	0	0	0	0	0	0	1	0	0	0	0	0	0
51427	ZNF107	2	2	0	0.2	0	1	1	0	0	0	0	0	0	0	0	0	0	0	0	0	0	0	0	0	0	0
10935	PRDX3	2	2	0	0.2	0	1	0	0	0	0	0	0	0	0	0	0	0	0	0	0	0	1	0	0	0	0
1353	COX11	2	1	1	0.1	0.166667	1	0	0	0	0	0	0	0	1	0	0	0	0	0	0	0	0	0	0	0	0
1938	EEF2	2	2	0	0.2	0	1	0	0	0	0	0	1	0	0	0	0	0	0	0	0	0	0	0	0	0	0
2203	FBP1	2	2	0	0.2	0	1	0	0	0	0	0	0	0	0	0	0	0	0	0	0	0	0	0	0	0	1
26207	PITPNC1	2	2	0	0.2	0	1	1	0	0	0	0	0	0	0	0	0	0	0	0	0	0	0	0	0	0	0
327	APEH	2	2	0	0.2	0	1	0	0	1	0	0	0	0	0	0	0	0	0	0	0	0	0	0	0	0	0
4170	MCL1	2	2	0	0.2	0	1	1	0	0	0	0	0	0	0	0	0	0	0	0	0	0	0	0	0	0	0
4281	MID1	2	2	0	0.2	0	1	0	0	1	0	0	0	0	0	0	0	0	0	0	0	0	0	0	0	0	0
4493	MT1E	2	1	1	0.1	0.166667	1	0	0	0	0	0	0	0	0	0	0	1	0	0	0	0	0	0	0	0	0
4502	MT2A	2	1	1	0.1	0.166667	1	0	0	0	0	0	0	0	0	0	0	1	0	0	0	0	0	0	0	0	0
4704	NDUFA9	2	2	0	0.2	0	1	0	0	0	0	0	1	0	0	0	0	0	0	0	0	0	0	0	0	0	0
51729	WBP11	2	2	0	0.2	0	1	0	0	0	0	0	1	0	0	0	0	0	0	0	0	0	0	0	0	0	0
5230	PGK1	2	2	0	0.2	0	1	1	0	0	0	0	0	0	0	0	0	0	0	0	0	0	0	0	0	0	0
5604	MAP2K1	2	1	0	0.1	0	1	0	0	0	0	0	0	0	0	0	0	0	0	0	0	0	0	1	0	0	0
6142	RPL18A	2	1	1	0.1	0.166667	1	0	0	0	0	0	0	0	0	0	0	1	0	0	0	0	0	0	0	0	0
6158	RPL28	2	1	1	0.1	0.166667	1	0	0	0	0	0	0	0	0	0	0	1	0	0	0	0	0	0	0	0	0
71	ACTG1	2	1	1	0.1	0.166667	1	0	0	0	0	0	0	0	0	0	0	1	0	0	0	0	0	0	0	0	0
7697	ZNF138	2	2	0	0.2	0	1	0	0	0	0	0	0	0	0	0	0	0	0	0	0	0	1	0	0	0	0
7748	ZNF195	2	2	0	0.2	0	1	1	0	0	0	0	0	0	0	0	0	0	0	0	0	0	0	0	0	0	0
820	CAMP	2	2	0	0.2	0	1	0	0	0	0	0	0	0	0	0	0	0	0	0	0	0	1	0	0	0	0
83481	EPPK1	2	2	0	0.2	0	1	0	0	0	0	0	0	0	0	0	0	0	0	0	0	0	0	0	0	0	1
8881	CDC16	2	1	1	0.1	0.166667	1	0	0	0	0	0	0	0	0	0	0	1	0	0	0	0	0	0	0	0	0
4074	M6PR	2	2	0	0.2	0	0	1	0	1	0	0	0	0	0	0	0	0	0	0	0	0	0	0	0	0	0
54596	L1TD1	2	2	0	0.2	0	0	1	0	1	0	0	0	0	0	0	0	0	0	0	0	0	0	0	0	0	0
2562	GABRB3	2	2	0	0.2	0	0	1	0	1	0	0	0	0	0	0	0	0	0	0	0	0	0	0	0	0	0
3620	IDO1	2	2	0	0.2	0	0	1	0	0	0	0	0	0	0	0	1	0	0	0	0	0	0	0	0	0	0
2239	GPC4	2	2	0	0.2	0	0	1	0	1	0	0	0	0	0	0	0	0	0	0	0	0	0	0	0	0	0
11145	PLA2G16	2	2	0	0.2	0	0	1	0	1	0	0	0	0	0	0	0	0	0	0	0	0	0	0	0	0	0
3308	HSPA4	2	2	0	0.2	0	0	1	1	0	0	0	0	0	0	0	0	0	0	0	0	0	0	0	0	0	0
10153	CEBPZ	2	2	0	0.2	0	0	1	0	0	0	0	0	0	0	0	0	0	0	0	0	0	0	0	0	0	1
1400	CRMP1	2	2	0	0.2	0	0	1	0	1	0	0	0	0	0	0	0	0	0	0	0	0	0	0	0	0	0
51704	GPRC5B	2	2	0	0.2	0	0	1	0	1	0	0	0	0	0	0	0	0	0	0	0	0	0	0	0	0	0
7546	ZIC2	2	2	0	0.2	0	0	1	0	1	0	0	0	0	0	0	0	0	0	0	0	0	0	0	0	0	0
2118	ETV4	2	2	0	0.2	0	0	1	0	1	0	0	0	0	0	0	0	0	0	0	0	0	0	0	0	0	0
11245	GPR176	2	1	0	0.1	0	0	1	0	0	0	0	0	0	0	0	0	0	0	0	1	0	0	0	0	0	0
2618	GART	2	2	0	0.2	0	0	1	0	0	0	0	1	0	0	0	0	0	0	0	0	0	0	0	0	0	0
4922	NTS	2	2	0	0.2	0	0	1	0	1	0	0	0	0	0	0	0	0	0	0	0	0	0	0	0	0	0
7855	FZD5	2	1	0	0.1	0	0	1	0	0	0	0	0	0	0	0	0	0	0	0	0	0	0	1	0	0	0
6423	SFRP2	2	2	0	0.2	0	0	1	1	0	0	0	0	0	0	0	0	0	0	0	0	0	0	0	0	0	0
3312	HSPA8	2	2	0	0.2	0	0	1	0	0	0	0	0	0	0	0	0	0	0	0	0	0	0	0	0	0	1
6480	ST6GAL1	2	2	0	0.2	0	0	1	0	1	0	0	0	0	0	0	0	0	0	0	0	0	0	0	0	0	0
6653	SORL1	2	2	0	0.2	0	0	1	0	1	0	0	0	0	0	0	0	0	0	0	0	0	0	0	0	0	0
51444	RNF138	2	2	0	0.2	0	0	1	0	0	1	0	0	0	0	0	0	0	0	0	0	0	0	0	0	0	0
54478	FAM64A	2	2	0	0.2	0	0	1	0	1	0	0	0	0	0	0	0	0	0	0	0	0	0	0	0	0	0
1075	CTSC	2	2	0	0.2	0	0	1	0	0	0	0	1	0	0	0	0	0	0	0	0	0	0	0	0	0	0
4176	MCM7	2	2	0	0.2	0	0	1	0	0	0	0	1	0	0	0	0	0	0	0	0	0	0	0	0	0	0
81620	CDT1	2	2	0	0.2	0	0	1	0	0	0	0	0	0	0	0	0	0	0	0	0	0	0	0	0	0	1
117156	SCGB3A2	2	2	0	0.2	0	0	1	0	1	0	0	0	0	0	0	0	0	0	0	0	0	0	0	0	0	0
6299	SALL1	2	1	1	0.1	0.166667	0	1	0	0	0	0	0	0	0	0	0	0	0	1	0	0	0	0	0	0	0
119	ADD2	2	2	0	0.2	0	0	1	0	1	0	0	0	0	0	0	0	0	0	0	0	0	0	0	0	0	0
836	CASP3	2	2	0	0.2	0	0	1	0	1	0	0	0	0	0	0	0	0	0	0	0	0	0	0	0	0	0
80324	PUS1	2	2	0	0.2	0	0	1	0	0	0	0	1	0	0	0	0	0	0	0	0	0	0	0	0	0	0
9188	DDX21	2	2	0	0.2	0	0	1	1	0	0	0	0	0	0	0	0	0	0	0	0	0	0	0	0	0	0
10196	PRMT3	2	2	0	0.2	0	0	1	0	0	0	0	1	0	0	0	0	0	0	0	0	0	0	0	0	0	0
11143	KAT7	2	2	0	0.2	0	0	1	0	0	0	0	0	0	0	0	0	0	0	0	0	0	0	0	0	0	1
1434	CSE1L	2	2	0	0.2	0	0	1	0	0	0	0	1	0	0	0	0	0	0	0	0	0	0	0	0	0	0
10049	DNAJB6	2	2	0	0.2	0	0	1	0	1	0	0	0	0	0	0	0	0	0	0	0	0	0	0	0	0	0
26135	SERBP1	2	2	0	0.2	0	0	1	0	1	0	0	0	0	0	0	0	0	0	0	0	0	0	0	0	0	0
23178	PASK	2	2	0	0.2	0	0	1	0	0	0	0	0	0	0	0	0	0	0	0	0	0	0	0	0	0	1
54014	BRWD1	2	2	0	0.2	0	0	1	0	1	0	0	0	0	0	0	0	0	0	0	0	0	0	0	0	0	0
57502	NLGN4X	2	2	0	0.2	0	0	1	0	1	0	0	0	0	0	0	0	0	0	0	0	0	0	0	0	0	0
157695	TDRP	2	2	0	0.2	0	0	1	0	1	0	0	0	0	0	0	0	0	0	0	0	0	0	0	0	0	0
29785	CYP2S1	2	2	0	0.2	0	0	1	0	1	0	0	0	0	0	0	0	0	0	0	0	0	0	0	0	0	0
23195	MDN1	2	2	0	0.2	0	0	1	0	1	0	0	0	0	0	0	0	0	0	0	0	0	0	0	0	0	0
7072	TIA1	2	1	1	0.1	0.166667	0	1	0	0	0	0	0	0	0	0	0	1	0	0	0	0	0	0	0	0	0
5097	PCDH1	2	2	0	0.2	0	0	1	0	1	0	0	0	0	0	0	0	0	0	0	0	0	0	0	0	0	0
4801	NFYB	2	1	1	0.1	0.166667	0	1	0	0	0	0	0	0	1	0	0	0	0	0	0	0	0	0	0	0	0
5411	PNN	2	2	0	0.2	0	0	1	0	0	0	0	0	0	0	0	0	0	0	0	0	0	0	0	0	0	1
5134	PDCD2	2	2	0	0.2	0	0	1	0	0	0	0	1	0	0	0	0	0	0	0	0	0	0	0	0	0	0
8886	DDX18	2	2	0	0.2	0	0	1	0	0	0	0	1	0	0	0	0	0	0	0	0	0	0	0	0	0	0
9201	DCLK1	2	2	0	0.2	0	0	1	0	1	0	0	0	0	0	0	0	0	0	0	0	0	0	0	0	0	0
9184	BUB3	2	2	0	0.2	0	0	1	0	0	0	0	1	0	0	0	0	0	0	0	0	0	0	0	0	0	0
23108	RAP1GAP2	2	2	0	0.2	0	0	1	0	1	0	0	0	0	0	0	0	0	0	0	0	0	0	0	0	0	0
7138	TNNT1	2	2	0	0.2	0	0	1	1	0	0	0	0	0	0	0	0	0	0	0	0	0	0	0	0	0	0
2842	GPR19	2	2	0	0.2	0	0	1	0	1	0	0	0	0	0	0	0	0	0	0	0	0	0	0	0	0	0
3329	HSPD1	2	2	0	0.2	0	0	1	0	0	0	0	0	0	0	0	0	0	0	0	0	0	0	0	0	0	1
26053	AUTS2	2	2	0	0.2	0	0	1	0	1	0	0	0	0	0	0	0	0	0	0	0	0	0	0	0	0	0
11004	KIF2C	2	1	0	0.1	0	0	1	0	0	0	0	0	0	0	0	0	0	0	0	0	1	0	0	0	0	0
1719	DHFR	2	2	0	0.2	0	0	1	0	0	0	0	0	0	0	0	0	0	0	0	0	0	0	0	0	0	1
221079	ARL5B	2	2	0	0.2	0	0	1	1	0	0	0	0	0	0	0	0	0	0	0	0	0	0	0	0	0	0
64782	AEN	2	2	0	0.2	0	0	1	0	1	0	0	0	0	0	0	0	0	0	0	0	0	0	0	0	0	0
10459	MAD2L2	2	2	0	0.2	0	0	1	1	0	0	0	0	0	0	0	0	0	0	0	0	0	0	0	0	0	0
2030	SLC29A1	2	2	0	0.2	0	0	1	0	1	0	0	0	0	0	0	0	0	0	0	0	0	0	0	0	0	0
5613	PRKX	2	2	0	0.2	0	0	1	0	1	0	0	0	0	0	0	0	0	0	0	0	0	0	0	0	0	0
10528	NOP56	2	2	0	0.2	0	0	1	0	0	0	0	0	0	0	0	0	0	0	0	0	0	0	0	0	0	1
11339	OIP5	2	1	0	0.1	0	0	1	0	0	0	0	0	0	0	0	0	0	0	0	0	1	0	0	0	0	0
55270	NUDT15	2	2	0	0.2	0	0	1	0	1	0	0	0	0	0	0	0	0	0	0	0	0	0	0	0	0	0
10146	G3BP1	2	2	0	0.2	0	0	1	0	0	0	0	1	0	0	0	0	0	0	0	0	0	0	0	0	0	0
9910	RABGAP1L	2	2	0	0.2	0	0	1	0	0	0	0	0	0	0	0	1	0	0	0	0	0	0	0	0	0	0
4838	NODAL	2	1	0	0.1	0	0	1	0	0	0	0	0	0	0	0	0	0	0	0	0	0	0	1	0	0	0
477	ATP1A2	2	1	1	0.1	0.166667	0	1	0	0	0	0	0	0	0	0	0	0	0	1	0	0	0	0	0	0	0
1741	DLG3	2	2	0	0.2	0	0	1	0	1	0	0	0	0	0	0	0	0	0	0	0	0	0	0	0	0	0
2571	GAD1	2	1	1	0.1	0.166667	0	1	0	0	0	0	0	0	0	0	0	0	0	1	0	0	0	0	0	0	0
57181	SLC39A10	2	2	0	0.2	0	0	1	0	1	0	0	0	0	0	0	0	0	0	0	0	0	0	0	0	0	0
708	C1QBP	2	1	1	0.1	0.166667	0	1	0	0	0	0	0	0	1	0	0	0	0	0	0	0	0	0	0	0	0
70	ACTC1	2	2	0	0.2	0	0	1	1	0	0	0	0	0	0	0	0	0	0	0	0	0	0	0	0	0	0
3800	KIF5C	2	2	0	0.2	0	0	1	0	0	0	0	0	0	0	0	1	0	0	0	0	0	0	0	0	0	0
1894	ECT2	2	1	0	0.1	0	0	1	0	0	0	0	0	0	0	0	0	0	0	0	0	1	0	0	0	0	0
1159	CKMT1B	2	2	0	0.2	0	0	1	0	1	0	0	0	0	0	0	0	0	0	0	0	0	0	0	0	0	0
25957	PNISR	2	1	1	0.1	0.166667	0	1	0	0	0	0	0	0	0	0	0	1	0	0	0	0	0	0	0	0	0
4141	MARS	2	1	1	0.1	0.166667	0	1	0	0	0	0	0	0	0	0	0	1	0	0	0	0	0	0	0	0	0
6091	ROBO1	2	1	1	0.1	0.166667	0	1	0	0	0	0	0	0	1	0	0	0	0	0	0	0	0	0	0	0	0
112399	EGLN3	2	1	1	0.1	0.166667	0	1	0	0	0	0	0	0	1	0	0	0	0	0	0	0	0	0	0	0	0
4144	MAT2A	2	1	1	0.1	0.166667	0	1	0	0	0	0	0	0	1	0	0	0	0	0	0	0	0	0	0	0	0
6229	RPS24	2	2	0	0.2	0	0	1	1	0	0	0	0	0	0	0	0	0	0	0	0	0	0	0	0	0	0
55471	NDUFAF7	2	2	0	0.2	0	0	1	0	0	0	1	0	0	0	0	0	0	0	0	0	0	0	0	0	0	0
11083	DIDO1	2	2	0	0.2	0	0	1	0	1	0	0	0	0	0	0	0	0	0	0	0	0	0	0	0	0	0
10644	IGF2BP2	2	2	0	0.2	0	0	1	0	1	0	0	0	0	0	0	0	0	0	0	0	0	0	0	0	0	0
81848	SPRY4	2	2	0	0.2	0	0	1	0	1	0	0	0	0	0	0	0	0	0	0	0	0	0	0	0	0	0
79007	DBNDD1	2	2	0	0.2	0	0	1	0	1	0	0	0	0	0	0	0	0	0	0	0	0	0	0	0	0	0
7913	DEK	2	2	0	0.2	0	0	1	0	0	0	0	1	0	0	0	0	0	0	0	0	0	0	0	0	0	0
1788	DNMT3A	2	2	0	0.2	0	0	1	0	1	0	0	0	0	0	0	0	0	0	0	0	0	0	0	0	0	0
55726	ASUN	2	1	1	0.1	0.166667	0	1	0	0	0	0	0	0	1	0	0	0	0	0	0	0	0	0	0	0	0
2058	EPRS	2	2	0	0.2	0	0	1	1	0	0	0	0	0	0	0	0	0	0	0	0	0	0	0	0	0	0
51816	CECR1	2	2	0	0.2	0	0	1	0	1	0	0	0	0	0	0	0	0	0	0	0	0	0	0	0	0	0
23242	COBL	2	2	0	0.2	0	0	1	0	0	0	0	0	0	0	0	1	0	0	0	0	0	0	0	0	0	0
4124	MAN2A1	2	2	0	0.2	0	0	1	0	0	0	1	0	0	0	0	0	0	0	0	0	0	0	0	0	0	0
8087	FXR1	2	1	1	0.1	0.166667	0	1	0	0	0	0	0	0	1	0	0	0	0	0	0	0	0	0	0	0	0
54517	PUS7	2	1	0	0.1	0	0	1	0	0	0	0	0	0	0	0	0	0	0	0	0	1	0	0	0	0	0
57504	MTA3	2	2	0	0.2	0	0	1	0	1	0	0	0	0	0	0	0	0	0	0	0	0	0	0	0	0	0
79158	GNPTAB	2	1	1	0.1	0.166667	0	1	0	0	0	0	0	0	0	0	0	1	0	0	0	0	0	0	0	0	0
5519	PPP2R1B	2	2	0	0.2	0	0	1	0	1	0	0	0	0	0	0	0	0	0	0	0	0	0	0	0	0	0
57541	ZNF398	2	2	0	0.2	0	0	1	0	1	0	0	0	0	0	0	0	0	0	0	0	0	0	0	0	0	0
6426	SRSF1	2	2	0	0.2	0	0	1	0	0	0	0	0	0	0	0	0	0	0	0	0	0	0	0	0	0	1
2064	ERBB2	2	2	0	0.2	0	0	1	0	1	0	0	0	0	0	0	0	0	0	0	0	0	0	0	0	0	0
5495	PPM1B	2	2	0	0.2	0	0	1	0	0	0	0	0	0	0	0	0	0	0	0	0	0	0	0	0	0	1
10360	NPM3	2	1	1	0.1	0.166667	0	1	0	0	0	0	0	0	1	0	0	0	0	0	0	0	0	0	0	0	0
5393	EXOSC9	2	2	0	0.2	0	0	1	0	0	0	0	0	0	0	0	0	0	0	0	0	0	0	0	0	0	1
9221	NOLC1	2	2	0	0.2	0	0	1	0	0	0	0	0	0	0	0	0	0	0	0	0	0	0	0	0	0	1
23411	SIRT1	2	2	0	0.2	0	0	1	0	0	0	0	0	0	0	0	0	0	0	0	0	0	0	0	0	0	1
4361	MRE11A	2	2	0	0.2	0	0	1	0	0	0	0	0	0	0	0	0	0	0	0	0	0	0	0	0	0	1
79647	AKIRIN1	2	2	0	0.2	0	0	1	0	1	0	0	0	0	0	0	0	0	0	0	0	0	0	0	0	0	0
5291	PIK3CB	2	1	0	0.1	0	0	1	0	0	0	0	0	0	0	0	0	0	0	0	0	0	0	1	0	0	0
5502	PPP1R1A	2	2	0	0.2	0	0	1	0	1	0	0	0	0	0	0	0	0	0	0	0	0	0	0	0	0	0
2736	GLI2	2	2	0	0.2	0	0	1	0	1	0	0	0	0	0	0	0	0	0	0	0	0	0	0	0	0	0
6664	SOX11	2	1	1	0.1	0.166667	0	1	0	0	0	0	0	0	0	0	0	0	0	1	0	0	0	0	0	0	0
54902	TTC19	2	2	0	0.2	0	0	1	0	1	0	0	0	0	0	0	0	0	0	0	0	0	0	0	0	0	0
123096	SLC25A29	2	2	0	0.2	0	0	1	0	1	0	0	0	0	0	0	0	0	0	0	0	0	0	0	0	0	0
10884	MRPS30	2	2	0	0.2	0	0	1	0	0	0	0	1	0	0	0	0	0	0	0	0	0	0	0	0	0	0
51361	HOOK1	2	2	0	0.2	0	0	1	0	1	0	0	0	0	0	0	0	0	0	0	0	0	0	0	0	0	0
684	BST2	2	1	1	0.1	0.166667	0	1	0	0	0	0	0	0	1	0	0	0	0	0	0	0	0	0	0	0	0
2026	ENO2	2	2	0	0.2	0	0	1	0	1	0	0	0	0	0	0	0	0	0	0	0	0	0	0	0	0	0
54910	SEMA4C	2	2	0	0.2	0	0	1	0	1	0	0	0	0	0	0	0	0	0	0	0	0	0	0	0	0	0
56339	METTL3	2	1	1	0.1	0.166667	0	1	0	0	0	0	0	1	0	0	0	0	0	0	0	0	0	0	0	0	0
64946	CENPH	2	1	0	0.1	0	0	1	0	0	0	0	0	0	0	0	0	0	0	0	1	0	0	0	0	0	0
26575	RGS17	2	1	1	0.1	0.166667	0	1	0	0	0	0	0	0	0	0	0	1	0	0	0	0	0	0	0	0	0
79682	CENPU	2	1	0	0.1	0	0	1	0	0	0	0	0	0	0	0	0	0	0	0	0	1	0	0	0	0	0
134492	NUDCD2	2	2	0	0.2	0	0	1	0	0	0	0	1	0	0	0	0	0	0	0	0	0	0	0	0	0	0
1399	CRKL	2	2	0	0.2	0	0	1	0	0	0	0	0	0	0	0	1	0	0	0	0	0	0	0	0	0	0
1515	CTSV	2	2	0	0.2	0	0	1	0	0	0	0	0	0	0	0	1	0	0	0	0	0	0	0	0	0	0
8362	HIST1H4K	2	2	0	0.2	0	0	1	0	0	0	0	0	0	0	0	0	0	0	0	0	0	1	0	0	0	0
153572	IRX2	2	2	0	0.2	0	0	1	0	1	0	0	0	0	0	0	0	0	0	0	0	0	0	0	0	0	0
55342	STRBP	2	2	0	0.2	0	0	1	0	0	0	0	0	0	0	0	0	0	0	0	0	0	0	0	0	0	1
7277	TUBA4A	2	1	1	0.1	0.166667	0	1	0	0	0	0	0	0	0	0	0	1	0	0	0	0	0	0	0	0	0
29106	SCG3	2	2	0	0.2	0	0	1	0	1	0	0	0	0	0	0	0	0	0	0	0	0	0	0	0	0	0
348093	RBPMS2	2	2	0	0.2	0	0	1	0	1	0	0	0	0	0	0	0	0	0	0	0	0	0	0	0	0	0
9945	GFPT2	2	2	0	0.2	0	0	1	0	1	0	0	0	0	0	0	0	0	0	0	0	0	0	0	0	0	0
8612	PPAP2C	2	2	0	0.2	0	0	1	0	0	0	0	0	0	0	0	0	0	0	0	0	0	0	0	0	0	1
8908	GYG2	2	1	1	0.1	0.166667	0	1	0	0	0	0	0	0	1	0	0	0	0	0	0	0	0	0	0	0	0
6175	RPLP0	2	2	0	0.2	0	0	1	1	0	0	0	0	0	0	0	0	0	0	0	0	0	0	0	0	0	0
3178	HNRNPA1	2	2	0	0.2	0	0	1	0	0	0	0	1	0	0	0	0	0	0	0	0	0	0	0	0	0	0
54621	VSIG10	2	1	1	0.1	0.166667	0	1	0	0	0	0	0	0	1	0	0	0	0	0	0	0	0	0	0	0	0
655	BMP7	2	2	0	0.2	0	0	1	0	1	0	0	0	0	0	0	0	0	0	0	0	0	0	0	0	0	0
3191	HNRNPL	2	2	0	0.2	0	0	1	0	0	0	0	1	0	0	0	0	0	0	0	0	0	0	0	0	0	0
200634	KRTCAP3	2	2	0	0.2	0	0	1	0	1	0	0	0	0	0	0	0	0	0	0	0	0	0	0	0	0	0
65251	ZNF649	2	2	0	0.2	0	0	1	0	1	0	0	0	0	0	0	0	0	0	0	0	0	0	0	0	0	0
4528	MTIF2	2	1	0	0.1	0	0	1	0	0	0	0	0	0	0	0	0	0	0	0	0	1	0	0	0	0	0
5930	RBBP6	2	2	0	0.2	0	0	1	0	0	0	0	0	0	0	0	0	0	0	0	0	0	1	0	0	0	0
5354	PLP1	2	2	0	0.2	0	0	1	0	0	1	0	0	0	0	0	0	0	0	0	0	0	0	0	0	0	0
4919	ROR1	2	1	0	0.1	0	0	1	0	0	0	0	0	0	0	0	0	0	0	0	1	0	0	0	0	0	0
10452	TOMM40	2	2	0	0.2	0	0	1	0	1	0	0	0	0	0	0	0	0	0	0	0	0	0	0	0	0	0
3785	KCNQ2	2	2	0	0.2	0	0	1	0	1	0	0	0	0	0	0	0	0	0	0	0	0	0	0	0	0	0
2649	NR6A1	2	1	0	0.1	0	0	1	0	0	0	0	0	0	0	0	0	0	0	0	0	0	0	0	1	0	0
3417	IDH1	2	2	0	0.2	0	0	1	1	0	0	0	0	0	0	0	0	0	0	0	0	0	0	0	0	0	0
221037	JMJD1C	2	1	1	0.1	0.166667	0	1	0	0	0	0	0	0	0	0	0	1	0	0	0	0	0	0	0	0	0
80119	PIF1	2	2	0	0.2	0	0	1	0	1	0	0	0	0	0	0	0	0	0	0	0	0	0	0	0	0	0
26271	FBXO5	2	1	0	0.1	0	0	1	0	0	0	0	0	0	0	0	0	0	0	0	0	1	0	0	0	0	0
55132	LARP1B	2	2	0	0.2	0	0	1	0	0	0	1	0	0	0	0	0	0	0	0	0	0	0	0	0	0	0
50808	AK3	2	2	0	0.2	0	0	1	0	0	1	0	0	0	0	0	0	0	0	0	0	0	0	0	0	0	0
203068	TUBB	2	2	0	0.2	0	0	1	1	0	0	0	0	0	0	0	0	0	0	0	0	0	0	0	0	0	0
10535	RNASEH2A	2	2	0	0.2	0	0	1	0	1	0	0	0	0	0	0	0	0	0	0	0	0	0	0	0	0	0
7022	TFAP2C	2	2	0	0.2	0	0	1	0	1	0	0	0	0	0	0	0	0	0	0	0	0	0	0	0	0	0
9768	KIAA0101	2	1	0	0.1	0	0	1	0	0	0	0	0	0	0	0	0	0	0	0	0	1	0	0	0	0	0
5584	PRKCI	2	1	1	0.1	0.166667	0	1	0	0	0	0	0	0	1	0	0	0	0	0	0	0	0	0	0	0	0
3092	HIP1	2	2	0	0.2	0	0	1	0	1	0	0	0	0	0	0	0	0	0	0	0	0	0	0	0	0	0
5357	PLS1	2	1	1	0.1	0.166667	0	1	0	0	0	0	0	0	1	0	0	0	0	0	0	0	0	0	0	0	0
5292	PIM1	2	2	0	0.2	0	0	1	0	1	0	0	0	0	0	0	0	0	0	0	0	0	0	0	0	0	0
6897	TARS	2	1	1	0.1	0.166667	0	1	0	0	0	0	0	0	1	0	0	0	0	0	0	0	0	0	0	0	0
158	ADSL	2	2	0	0.2	0	0	1	0	0	0	0	1	0	0	0	0	0	0	0	0	0	0	0	0	0	0
9136	RRP9	2	2	0	0.2	0	0	1	0	1	0	0	0	0	0	0	0	0	0	0	0	0	0	0	0	0	0
85462	FHDC1	2	2	0	0.2	0	0	1	0	1	0	0	0	0	0	0	0	0	0	0	0	0	0	0	0	0	0
10733	PLK4	2	2	0	0.2	0	0	1	0	0	0	0	1	0	0	0	0	0	0	0	0	0	0	0	0	0	0
126695	KDF1	2	2	0	0.2	0	0	1	0	1	0	0	0	0	0	0	0	0	0	0	0	0	0	0	0	0	0
79000	AUNIP	2	1	0	0.1	0	0	1	0	0	0	0	0	0	0	0	0	0	0	0	1	0	0	0	0	0	0
26747	NUFIP1	2	1	1	0.1	0.166667	0	1	0	0	0	0	0	0	1	0	0	0	0	0	0	0	0	0	0	0	0
56647	BCCIP	2	2	0	0.2	0	0	1	0	0	0	0	0	0	0	0	0	0	0	0	0	0	0	0	0	0	1
55789	DEPDC1B	2	1	0	0.1	0	0	1	0	0	0	0	0	0	0	0	0	0	0	0	1	0	0	0	0	0	0
1491	CTH	2	2	0	0.2	0	0	1	0	1	0	0	0	0	0	0	0	0	0	0	0	0	0	0	0	0	0
5982	RFC2	2	2	0	0.2	0	0	1	0	0	0	0	0	0	0	0	0	0	0	0	0	0	0	0	0	0	1
9521	EEF1E1	2	2	0	0.2	0	0	1	0	0	0	0	1	0	0	0	0	0	0	0	0	0	0	0	0	0	0
11013	TMSB15A	2	1	1	0.1	0.166667	0	1	0	0	0	0	0	0	0	0	0	0	0	1	0	0	0	0	0	0	0
27324	TOX3	2	2	0	0.2	0	0	1	0	0	0	0	0	0	0	0	1	0	0	0	0	0	0	0	0	0	0
10565	ARFGEF1	2	2	0	0.2	0	0	1	0	0	0	0	0	0	0	0	1	0	0	0	0	0	0	0	0	0	0
84365	NIFK	2	2	0	0.2	0	0	1	0	0	0	0	1	0	0	0	0	0	0	0	0	0	0	0	0	0	0
55847	CISD1	2	2	0	0.2	0	0	1	0	0	0	0	1	0	0	0	0	0	0	0	0	0	0	0	0	0	0
6917	TCEA1	2	2	0	0.2	0	0	1	0	1	0	0	0	0	0	0	0	0	0	0	0	0	0	0	0	0	0
1736	DKC1	2	1	1	0.1	0.166667	0	1	0	0	0	0	0	0	1	0	0	0	0	0	0	0	0	0	0	0	0
56474	CTPS2	2	1	1	0.1	0.166667	0	1	0	0	0	0	0	0	1	0	0	0	0	0	0	0	0	0	0	0	0
153562	MARVELD2	2	2	0	0.2	0	0	1	0	0	0	1	0	0	0	0	0	0	0	0	0	0	0	0	0	0	0
55731	FAM222B	2	2	0	0.2	0	0	1	0	1	0	0	0	0	0	0	0	0	0	0	0	0	0	0	0	0	0
55705	IPO9	2	2	0	0.2	0	0	1	0	0	0	0	1	0	0	0	0	0	0	0	0	0	0	0	0	0	0
3397	ID1	2	1	0	0.1	0	0	1	0	0	0	0	0	0	0	0	0	0	0	0	0	0	0	1	0	0	0
23428	SLC7A8	2	1	1	0.1	0.166667	0	1	0	0	0	0	0	0	1	0	0	0	0	0	0	0	0	0	0	0	0
7411	VBP1	2	2	0	0.2	0	0	1	0	0	0	0	1	0	0	0	0	0	0	0	0	0	0	0	0	0	0
64710	NUCKS1	2	2	0	0.2	0	0	1	0	1	0	0	0	0	0	0	0	0	0	0	0	0	0	0	0	0	0
8731	RNMT	2	2	0	0.2	0	0	1	0	0	0	0	0	0	0	0	1	0	0	0	0	0	0	0	0	0	0
64682	ANAPC1	2	2	0	0.2	0	0	1	0	0	0	0	0	0	0	0	0	0	0	0	0	0	0	0	0	0	1
4747	NEFL	2	2	0	0.2	0	0	1	0	1	0	0	0	0	0	0	0	0	0	0	0	0	0	0	0	0	0
26051	PPP1R16B	2	2	0	0.2	0	0	1	0	0	0	0	0	0	0	0	1	0	0	0	0	0	0	0	0	0	0
4145	MATK	2	2	0	0.2	0	0	1	0	0	0	0	0	0	0	0	0	0	0	0	0	0	0	0	0	0	1
4697	NDUFA4	2	2	0	0.2	0	0	1	0	1	0	0	0	0	0	0	0	0	0	0	0	0	0	0	0	0	0
11157	LSM6	2	2	0	0.2	0	0	1	0	0	0	0	0	0	0	0	0	0	0	0	0	0	0	0	0	0	1
174	AFP	2	2	0	0.2	0	0	1	0	0	0	1	0	0	0	0	0	0	0	0	0	0	0	0	0	0	0
8320	EOMES	2	1	0	0.1	0	0	1	0	0	0	0	0	0	0	0	0	0	0	0	0	0	0	0	1	0	0
6387	CXCL12	2	1	1	0.1	0.166667	0	1	0	0	0	0	0	0	0	0	0	0	1	0	0	0	0	0	0	0	0
57687	VAT1L	2	2	0	0.2	0	0	1	0	1	0	0	0	0	0	0	0	0	0	0	0	0	0	0	0	0	0
55157	DARS2	2	2	0	0.2	0	0	1	0	0	0	0	1	0	0	0	0	0	0	0	0	0	0	0	0	0	0
978	CDA	2	2	0	0.2	0	0	1	0	0	0	0	0	0	0	0	0	0	0	0	0	0	0	0	0	0	1
6490	PMEL	2	2	0	0.2	0	0	1	0	1	0	0	0	0	0	0	0	0	0	0	0	0	0	0	0	0	0
287	ANK2	2	1	1	0.1	0.166667	0	1	0	0	0	0	0	0	0	0	0	0	0	1	0	0	0	0	0	0	0
9063	PIAS2	2	2	0	0.2	0	0	1	0	0	0	0	0	0	0	0	0	0	0	0	0	0	0	0	0	0	1
51132	RLIM	2	2	0	0.2	0	0	1	0	1	0	0	0	0	0	0	0	0	0	0	0	0	0	0	0	0	0
8905	AP1S2	2	2	0	0.2	0	0	1	0	1	0	0	0	0	0	0	0	0	0	0	0	0	0	0	0	0	0
1660	DHX9	2	2	0	0.2	0	0	1	0	0	0	0	1	0	0	0	0	0	0	0	0	0	0	0	0	0	0
1004	CDH6	2	1	0	0.1	0	0	1	0	0	0	0	0	0	0	0	0	0	0	0	1	0	0	0	0	0	0
10230	NBR2	2	2	0	0.2	0	0	1	1	0	0	0	0	0	0	0	0	0	0	0	0	0	0	0	0	0	0
84262	PSMG3	2	2	0	0.2	0	0	1	0	1	0	0	0	0	0	0	0	0	0	0	0	0	0	0	0	0	0
6520	SLC3A2	2	2	0	0.2	0	0	1	0	1	0	0	0	0	0	0	0	0	0	0	0	0	0	0	0	0	0
27293	SMPDL3B	2	2	0	0.2	0	0	1	0	0	0	0	0	0	0	0	1	0	0	0	0	0	0	0	0	0	0
10694	CCT8	2	2	0	0.2	0	0	1	1	0	0	0	0	0	0	0	0	0	0	0	0	0	0	0	0	0	0
51351	ZNF117	2	2	0	0.2	0	0	1	1	0	0	0	0	0	0	0	0	0	0	0	0	0	0	0	0	0	0
10527	IPO7	2	1	1	0.1	0.166667	0	1	0	0	0	0	0	0	1	0	0	0	0	0	0	0	0	0	0	0	0
9543	IGDCC3	2	2	0	0.2	0	0	1	0	1	0	0	0	0	0	0	0	0	0	0	0	0	0	0	0	0	0
10193	RNF41	2	2	0	0.2	0	0	1	0	1	0	0	0	0	0	0	0	0	0	0	0	0	0	0	0	0	0
54801	HAUS6	2	1	0	0.1	0	0	1	0	0	0	0	0	0	0	0	0	0	0	0	1	0	0	0	0	0	0
29889	GNL2	2	1	0	0.1	0	0	1	0	0	0	0	0	0	0	0	0	0	0	0	1	0	0	0	0	0	0
79887	PLBD1	2	1	1	0.1	0.166667	0	1	0	0	0	0	0	0	0	0	0	1	0	0	0	0	0	0	0	0	0
10291	SF3A1	2	2	0	0.2	0	0	1	0	0	0	0	0	0	0	0	0	0	0	0	0	0	1	0	0	0	0
7070	THY1	2	2	0	0.2	0	0	1	0	1	0	0	0	0	0	0	0	0	0	0	0	0	0	0	0	0	0
6124	RPL4	2	2	0	0.2	0	0	1	1	0	0	0	0	0	0	0	0	0	0	0	0	0	0	0	0	0	0
10518	CIB2	2	2	0	0.2	0	0	1	0	1	0	0	0	0	0	0	0	0	0	0	0	0	0	0	0	0	0
63931	MRPS14	2	1	1	0.1	0.166667	0	1	0	0	0	0	0	0	1	0	0	0	0	0	0	0	0	0	0	0	0
1875	E2F5	2	2	0	0.2	0	0	1	0	1	0	0	0	0	0	0	0	0	0	0	0	0	0	0	0	0	0
148281	SYT6	2	2	0	0.2	0	0	1	0	1	0	0	0	0	0	0	0	0	0	0	0	0	0	0	0	0	0
999	CDH1	2	2	0	0.2	0	0	1	0	1	0	0	0	0	0	0	0	0	0	0	0	0	0	0	0	0	0
113835	ZNF257	2	2	0	0.2	0	0	1	1	0	0	0	0	0	0	0	0	0	0	0	0	0	0	0	0	0	0
4237	MFAP2	2	2	0	0.2	0	0	1	0	1	0	0	0	0	0	0	0	0	0	0	0	0	0	0	0	0	0
4860	PNP	2	2	0	0.2	0	0	1	0	0	0	0	0	0	0	0	0	0	0	0	0	0	0	0	0	0	1
285203	EOGT	2	1	1	0.1	0.166667	0	1	0	0	0	0	0	0	1	0	0	0	0	0	0	0	0	0	0	0	0
22948	CCT5	2	2	0	0.2	0	0	1	0	0	0	0	1	0	0	0	0	0	0	0	0	0	0	0	0	0	0
27087	B3GAT1	2	2	0	0.2	0	0	1	0	1	0	0	0	0	0	0	0	0	0	0	0	0	0	0	0	0	0
9244	CRLF1	2	2	0	0.2	0	0	1	0	0	0	0	0	0	0	0	0	0	0	0	0	0	1	0	0	0	0
259266	ASPM	2	1	0	0.1	0	0	1	0	0	0	0	0	0	0	0	0	0	0	0	0	1	0	0	0	0	0
2186	BPTF	2	2	0	0.2	0	0	1	0	1	0	0	0	0	0	0	0	0	0	0	0	0	0	0	0	0	0
8502	PKP4	2	1	1	0.1	0.166667	0	1	0	0	0	0	0	0	1	0	0	0	0	0	0	0	0	0	0	0	0
10432	RBM14	2	2	0	0.2	0	0	1	0	0	0	0	0	0	0	0	0	0	0	0	0	0	0	0	0	0	1
51029	DESI2	2	1	1	0.1	0.166667	0	1	0	0	0	0	0	0	0	0	0	1	0	0	0	0	0	0	0	0	0
57595	PDZD4	2	2	0	0.2	0	0	1	0	1	0	0	0	0	0	0	0	0	0	0	0	0	0	0	0	0	0
29097	CNIH4	2	2	0	0.2	0	0	1	0	1	0	0	0	0	0	0	0	0	0	0	0	0	0	0	0	0	0
23395	LARS2	2	2	0	0.2	0	0	1	0	1	0	0	0	0	0	0	0	0	0	0	0	0	0	0	0	0	0
5272	SERPINB9	2	2	0	0.2	0	0	1	0	1	0	0	0	0	0	0	0	0	0	0	0	0	0	0	0	0	0
6129	RPL7	2	2	0	0.2	0	0	1	1	0	0	0	0	0	0	0	0	0	0	0	0	0	0	0	0	0	0
9933	KIAA0020	2	1	0	0.1	0	0	1	0	0	0	0	0	0	0	0	0	0	0	0	1	0	0	0	0	0	0
1832	DSP	2	2	0	0.2	0	0	1	0	1	0	0	0	0	0	0	0	0	0	0	0	0	0	0	0	0	0
375704	ENHO	2	2	0	0.2	0	0	1	0	1	0	0	0	0	0	0	0	0	0	0	0	0	0	0	0	0	0
26586	CKAP2	2	2	0	0.2	0	0	1	0	0	0	0	1	0	0	0	0	0	0	0	0	0	0	0	0	0	0
3171	FOXA3	2	2	0	0.2	0	0	1	0	1	0	0	0	0	0	0	0	0	0	0	0	0	0	0	0	0	0
6240	RRM1	2	2	0	0.2	0	0	1	0	0	0	0	1	0	0	0	0	0	0	0	0	0	0	0	0	0	0
84823	LMNB2	2	2	0	0.2	0	0	1	0	1	0	0	0	0	0	0	0	0	0	0	0	0	0	0	0	0	0
80824	DUSP16	2	2	0	0.2	0	0	1	0	1	0	0	0	0	0	0	0	0	0	0	0	0	0	0	0	0	0
8339	HIST1H2BG	2	1	1	0.1	0.166667	0	1	0	0	0	0	0	0	1	0	0	0	0	0	0	0	0	0	0	0	0
6634	SNRPD3	2	1	0	0.1	0	0	1	0	0	0	0	0	0	0	0	0	0	0	0	1	0	0	0	0	0	0
10788	IQGAP2	2	1	1	0.1	0.166667	0	1	0	0	0	0	0	0	1	0	0	0	0	0	0	0	0	0	0	0	0
6498	SKIL	2	1	0	0.1	0	0	1	0	0	0	0	0	0	0	0	0	0	0	0	0	0	0	1	0	0	0
2281	FKBP1B	2	2	0	0.2	0	0	1	0	0	0	0	0	0	0	0	1	0	0	0	0	0	0	0	0	0	0
1428	CRYM	2	2	0	0.2	0	0	1	0	1	0	0	0	0	0	0	0	0	0	0	0	0	0	0	0	0	0
84678	KDM2B	2	2	0	0.2	0	0	1	0	1	0	0	0	0	0	0	0	0	0	0	0	0	0	0	0	0	0
10406	WFDC2	2	2	0	0.2	0	0	1	0	1	0	0	0	0	0	0	0	0	0	0	0	0	0	0	0	0	0
55183	RIF1	2	1	0	0.1	0	0	1	0	0	0	0	0	0	0	0	0	0	0	0	0	0	0	1	0	0	0
1841	DTYMK	2	2	0	0.2	0	0	1	0	0	0	0	1	0	0	0	0	0	0	0	0	0	0	0	0	0	0
2287	FKBP3	2	2	0	0.2	0	0	1	0	0	0	0	0	0	0	0	0	0	0	0	0	0	0	0	0	0	1
10252	SPRY1	2	1	1	0.1	0.166667	0	1	0	0	0	0	0	0	1	0	0	0	0	0	0	0	0	0	0	0	0
55166	CENPQ	2	2	0	0.2	0	0	1	0	0	0	0	0	0	0	0	0	0	0	0	0	0	1	0	0	0	0
6515	SLC2A3	2	2	0	0.2	0	0	1	0	1	0	0	0	0	0	0	0	0	0	0	0	0	0	0	0	0	0
1488	CTBP2	2	2	0	0.2	0	0	1	0	0	0	0	0	0	0	0	0	0	0	0	0	0	0	0	0	0	1
1366	CLDN7	2	2	0	0.2	0	0	1	0	1	0	0	0	0	0	0	0	0	0	0	0	0	0	0	0	0	0
9410	SNRNP40	2	2	0	0.2	0	0	1	0	0	0	0	1	0	0	0	0	0	0	0	0	0	0	0	0	0	0
56938	ARNTL2	2	1	1	0.1	0.166667	0	1	0	0	0	0	0	0	1	0	0	0	0	0	0	0	0	0	0	0	0
29087	THYN1	2	1	1	0.1	0.166667	0	1	0	0	0	0	0	0	1	0	0	0	0	0	0	0	0	0	0	0	0
4999	ORC2	2	2	0	0.2	0	0	1	0	0	0	0	0	0	0	0	0	0	0	0	0	0	0	0	0	0	1
116028	RMI2	2	2	0	0.2	0	0	1	0	1	0	0	0	0	0	0	0	0	0	0	0	0	0	0	0	0	0
64757	MTARC1	2	2	0	0.2	0	0	1	0	1	0	0	0	0	0	0	0	0	0	0	0	0	0	0	0	0	0
2554	GABRA1	2	2	0	0.2	0	0	1	0	1	0	0	0	0	0	0	0	0	0	0	0	0	0	0	0	0	0
84154	RPF2	2	1	0	0.1	0	0	1	0	0	0	0	0	0	0	0	0	0	0	0	1	0	0	0	0	0	0
5985	RFC5	2	2	0	0.2	0	0	1	0	0	0	0	0	0	0	0	0	0	0	0	0	0	0	0	0	0	1
23266	LPHN2	2	2	0	0.2	0	0	1	0	1	0	0	0	0	0	0	0	0	0	0	0	0	0	0	0	0	0
5725	PTBP1	2	2	0	0.2	0	0	1	0	1	0	0	0	0	0	0	0	0	0	0	0	0	0	0	0	0	0
51096	UTP18	2	2	0	0.2	0	0	1	0	0	0	0	1	0	0	0	0	0	0	0	0	0	0	0	0	0	0
1737	DLAT	2	2	0	0.2	0	0	1	0	0	0	0	1	0	0	0	0	0	0	0	0	0	0	0	0	0	0
8661	EIF3A	2	2	0	0.2	0	0	1	0	0	0	0	1	0	0	0	0	0	0	0	0	0	0	0	0	0	0
5754	PTK7	2	2	0	0.2	0	0	1	0	1	0	0	0	0	0	0	0	0	0	0	0	0	0	0	0	0	0
10072	DPP3	2	2	0	0.2	0	0	1	0	0	0	0	1	0	0	0	0	0	0	0	0	0	0	0	0	0	0
10382	TUBB4A	2	2	0	0.2	0	0	0	1	0	0	0	0	0	0	0	0	0	0	0	0	0	1	0	0	0	0
10413	YAP1	2	2	0	0.2	0	0	0	0	0	0	0	1	0	0	0	0	0	0	0	0	0	1	0	0	0	0
8894	EIF2S2	2	2	0	0.2	0	0	0	0	0	0	0	1	0	0	0	0	0	0	0	0	0	1	0	0	0	0
5523	PPP2R3A	2	1	1	0.1	0.166667	0	0	0	0	0	0	0	0	1	0	0	0	0	0	0	0	1	0	0	0	0
51692	CPSF3	2	1	0	0.1	0	0	0	0	0	0	0	0	0	0	0	0	0	0	0	1	0	1	0	0	0	0
374654	KIF7	2	1	0	0.1	0	0	0	0	0	0	0	0	0	0	0	0	0	0	0	1	0	1	0	0	0	0
9510	ADAMTS1	2	1	1	0.1	0.166667	0	0	0	0	0	0	0	0	0	0	0	0	1	0	0	0	1	0	0	0	0
7528	YY1	2	2	0	0.2	0	0	0	0	0	0	0	1	0	0	0	0	0	0	0	0	0	1	0	0	0	0
5829	PXN	2	2	0	0.2	0	0	0	0	0	0	0	0	0	0	0	0	0	0	0	0	0	1	0	0	0	1
8891	EIF2B3	2	1	0	0.1	0	0	0	0	0	0	0	0	0	0	0	0	0	0	0	1	0	1	0	0	0	0
10293	TRAIP	2	2	0	0.2	0	0	0	0	0	0	0	0	0	0	0	0	0	0	0	0	0	1	0	0	0	1
7164	TPD52L1	2	1	1	0.1	0.166667	0	0	0	0	0	0	0	0	1	0	0	0	0	0	0	0	1	0	0	0	0
3976	LIF	2	1	0	0.1	0	0	0	0	0	0	0	0	0	0	0	0	0	0	0	0	0	1	1	0	0	0
100	ADA	2	1	1	0.1	0.166667	0	0	0	0	0	0	0	0	1	0	0	0	0	0	0	0	1	0	0	0	0
8971	H1FX	2	1	1	0.1	0.166667	0	0	0	0	0	0	0	0	1	0	0	0	0	0	0	0	1	0	0	0	0
80306	MED28	2	2	0	0.2	0	0	0	0	1	0	0	0	0	0	0	0	0	0	0	0	0	1	0	0	0	0
10492	SYNCRIP	2	2	0	0.2	0	0	0	0	0	0	0	0	0	0	0	0	0	0	0	0	0	1	0	0	0	1
154141	MBOAT1	2	1	1	0.1	0.166667	0	0	0	0	0	0	0	1	0	0	0	0	0	0	0	0	1	0	0	0	0
8721	EDF1	2	1	1	0.1	0.166667	0	0	0	0	0	0	0	0	0	0	0	1	0	0	0	0	1	0	0	0	0
7979	SHFM1	2	1	1	0.1	0.166667	0	0	0	0	0	0	0	0	1	0	0	0	0	0	0	0	1	0	0	0	0
2746	GLUD1	2	1	1	0.1	0.166667	0	0	0	0	0	0	0	0	0	0	0	1	0	0	0	0	1	0	0	0	0
324	APC	2	1	0	0.1	0	0	0	0	0	0	0	0	0	0	0	0	0	0	0	0	0	1	1	0	0	0
3670	ISL1	2	1	0	0.1	0	0	0	0	0	0	0	0	0	0	0	0	0	0	0	0	0	1	1	0	0	0
54928	IMPAD1	2	1	1	0.1	0.166667	0	0	0	0	0	0	0	0	0	0	0	1	0	0	0	0	1	0	0	0	0
54554	WDR5B	2	1	1	0.1	0.166667	0	0	0	0	0	0	0	0	1	0	0	0	0	0	0	0	1	0	0	0	0
1212	CLTB	2	1	1	0.1	0.166667	0	0	0	0	0	0	0	0	0	0	0	1	0	0	0	0	1	0	0	0	0
1476	CSTB	2	1	1	0.1	0.166667	0	0	0	0	0	0	0	0	0	0	0	1	0	0	0	0	1	0	0	0	0
10863	ADAM28	2	1	1	0.1	0.166667	0	0	0	0	0	0	0	0	0	1	0	0	0	0	0	0	1	0	0	0	0
8192	CLPP	2	2	0	0.2	0	0	0	0	0	0	0	1	0	0	0	0	0	0	0	0	0	1	0	0	0	0
55862	ECHDC1	2	1	1	0.1	0.166667	0	0	0	0	0	0	0	0	0	0	0	1	0	0	0	0	1	0	0	0	0
7552	ZNF711	2	1	1	0.1	0.166667	0	0	0	0	0	0	0	1	0	0	0	0	0	0	0	0	1	0	0	0	0
79768	KATNBL1	2	1	1	0.1	0.166667	0	0	0	0	0	0	0	0	1	0	0	0	0	0	0	0	1	0	0	0	0
2739	GLO1	2	2	0	0.2	0	0	0	0	0	0	0	1	0	0	0	0	0	0	0	0	0	1	0	0	0	0
3382	ICA1	2	1	1	0.1	0.166667	0	0	0	0	0	0	0	0	1	0	0	0	0	0	0	0	1	0	0	0	0
6421	SFPQ	2	1	1	0.1	0.166667	0	0	0	0	0	0	0	0	0	0	0	1	0	0	0	0	1	0	0	0	0
23423	TMED3	2	1	1	0.1	0.166667	0	0	0	0	0	0	0	0	1	0	0	0	0	0	0	0	1	0	0	0	0
6347	CCL2	2	2	0	0.2	0	0	0	0	1	0	0	0	0	0	0	0	0	0	0	0	0	1	0	0	0	0
1045	CDX2	2	1	0	0.1	0	0	0	0	0	0	0	0	0	0	0	0	0	0	0	0	0	1	0	1	0	0
56998	CTNNBIP1	2	2	0	0.2	0	0	0	0	1	0	0	0	0	0	0	0	0	0	0	0	0	1	0	0	0	0
5317	PKP1	2	1	1	0.1	0.166667	0	0	0	0	0	0	0	0	0	0	0	1	0	0	0	0	1	0	0	0	0
139324	HDX	2	1	0	0.1	0	0	0	0	0	0	0	0	0	0	0	0	0	0	0	1	0	1	0	0	0	0
79607	FAM118B	2	1	0	0.1	0	0	0	0	0	0	0	0	0	0	0	0	0	0	0	1	0	1	0	0	0	0
835	CASP2	2	1	1	0.1	0.166667	0	0	0	0	0	0	0	0	1	0	0	0	0	0	0	0	1	0	0	0	0
51366	UBR5	2	1	1	0.1	0.166667	0	0	0	0	0	0	0	0	0	0	0	1	0	0	0	0	1	0	0	0	0
221294	NT5DC1	2	2	0	0.2	0	0	0	0	0	0	1	0	0	0	0	0	0	0	0	0	0	1	0	0	0	0
9338	TCEAL1	2	1	1	0.1	0.166667	0	0	0	0	0	0	0	0	1	0	0	0	0	0	0	0	1	0	0	0	0
55765	C1orf106	2	2	0	0.2	0	0	0	0	1	0	0	0	0	0	0	0	0	0	0	0	0	1	0	0	0	0
389421	LIN28B	2	1	0	0.1	0	0	0	0	1	0	0	0	0	0	0	0	0	0	0	1	0	0	0	0	0	0
205	AK4	2	2	0	0.2	0	0	0	0	1	0	0	1	0	0	0	0	0	0	0	0	0	0	0	0	0	0
79805	VASH2	2	1	1	0.1	0.166667	0	0	0	1	0	0	0	0	1	0	0	0	0	0	0	0	0	0	0	0	0
6513	SLC2A1	2	2	0	0.2	0	0	0	0	1	0	0	1	0	0	0	0	0	0	0	0	0	0	0	0	0	0
4192	MDK	2	1	1	0.1	0.166667	0	0	0	1	0	0	0	0	0	1	0	0	0	0	0	0	0	0	0	0	0
8079	MLF2	2	1	1	0.1	0.166667	0	0	0	1	0	0	0	0	1	0	0	0	0	0	0	0	0	0	0	0	0
7741	ZSCAN26	2	1	1	0.1	0.166667	0	0	0	1	0	0	0	0	1	0	0	0	0	0	0	0	0	0	0	0	0
10620	ARID3B	2	2	0	0.2	0	0	0	0	1	0	0	0	0	0	0	0	0	0	0	0	0	0	0	0	0	1
9633	MTL5	2	1	1	0.1	0.166667	0	0	0	1	0	0	0	0	1	0	0	0	0	0	0	0	0	0	0	0	0
4725	NDUFS5	2	1	1	0.1	0.166667	0	0	0	1	0	0	0	0	0	0	0	1	0	0	0	0	0	0	0	0	0
1462	VCAN	2	1	1	0.1	0.166667	0	0	0	1	0	0	0	0	0	0	0	1	0	0	0	0	0	0	0	0	0
284307	ZIK1	2	2	0	0.2	0	0	0	0	1	0	1	0	0	0	0	0	0	0	0	0	0	0	0	0	0	0
51495	PTPLAD1	2	1	1	0.1	0.166667	0	0	0	1	0	0	0	0	1	0	0	0	0	0	0	0	0	0	0	0	0
10253	SPRY2	2	1	1	0.1	0.166667	0	0	0	1	0	0	0	0	1	0	0	0	0	0	0	0	0	0	0	0	0
91408	BTF3L4	2	1	1	0.1	0.166667	0	0	0	1	0	0	0	0	0	0	0	1	0	0	0	0	0	0	0	0	0
7775	ZNF232	2	1	1	0.1	0.166667	0	0	0	1	0	0	0	0	1	0	0	0	0	0	0	0	0	0	0	0	0
83871	RAB34	2	2	0	0.2	0	0	0	0	1	0	0	1	0	0	0	0	0	0	0	0	0	0	0	0	0	0
7837	PXDN	2	1	1	0.1	0.166667	0	0	0	1	0	0	0	0	1	0	0	0	0	0	0	0	0	0	0	0	0
10418	SPON1	2	1	1	0.1	0.166667	0	0	0	1	0	0	0	0	0	0	0	1	0	0	0	0	0	0	0	0	0
607	BCL9	2	1	1	0.1	0.166667	0	0	0	1	0	0	0	0	1	0	0	0	0	0	0	0	0	0	0	0	0
5694	PSMB6	2	2	0	0.2	0	0	0	0	1	0	0	1	0	0	0	0	0	0	0	0	0	0	0	0	0	0
55344	PLCXD1	2	1	1	0.1	0.166667	0	0	0	1	0	0	0	0	1	0	0	0	0	0	0	0	0	0	0	0	0
4162	MCAM	2	1	0	0.1	0	0	0	0	1	0	0	0	0	0	0	0	0	0	0	0	1	0	0	0	0	0
8313	AXIN2	2	1	0	0.1	0	0	0	0	1	0	0	0	0	0	0	0	0	0	0	0	0	0	1	0	0	0
6309	SC5D	2	1	1	0.1	0.166667	0	0	0	1	0	0	0	0	1	0	0	0	0	0	0	0	0	0	0	0	0
23090	ZNF423	2	1	1	0.1	0.166667	0	0	0	1	0	0	0	0	1	0	0	0	0	0	0	0	0	0	0	0	0
578	BAK1	2	2	0	0.2	0	0	0	0	1	0	0	0	0	0	0	0	0	0	0	0	0	0	0	0	0	1
5978	REST	2	1	0	0.1	0	0	0	0	1	0	0	0	0	0	0	0	0	0	0	0	0	0	1	0	0	0
57162	PELI1	2	2	0	0.2	0	0	0	0	1	0	0	0	0	0	0	1	0	0	0	0	0	0	0	0	0	0
2065	ERBB3	2	2	0	0.2	0	0	0	0	1	0	0	0	0	0	0	0	0	0	0	0	0	0	0	0	0	1
8614	STC2	2	1	1	0.1	0.166667	0	0	0	1	0	0	0	0	0	0	0	0	1	0	0	0	0	0	0	0	0
10631	POSTN	2	1	1	0.1	0.166667	0	0	0	1	0	0	0	0	0	0	0	0	1	0	0	0	0	0	0	0	0
23633	KPNA6	2	2	0	0.2	0	0	0	0	1	0	0	1	0	0	0	0	0	0	0	0	0	0	0	0	0	0
10772	SRSF10	2	2	0	0.2	0	0	0	0	1	0	0	1	0	0	0	0	0	0	0	0	0	0	0	0	0	0
56265	CPXM1	2	1	1	0.1	0.166667	0	0	0	1	0	0	0	1	0	0	0	0	0	0	0	0	0	0	0	0	0
402	ARL2	2	1	1	0.1	0.166667	0	0	0	1	0	0	0	0	1	0	0	0	0	0	0	0	0	0	0	0	0
898	CCNE1	2	2	0	0.2	0	0	0	0	1	0	0	0	0	0	0	0	0	0	0	0	0	0	0	0	0	1
1968	EIF2S3	2	2	0	0.2	0	0	0	0	1	0	0	1	0	0	0	0	0	0	0	0	0	0	0	0	0	0
3020	H3F3A	2	2	0	0.2	0	0	0	0	1	0	0	0	0	0	0	1	0	0	0	0	0	0	0	0	0	0
54475	NLE1	2	2	0	0.2	0	0	0	0	1	0	0	0	0	0	0	0	0	0	0	0	0	0	0	0	0	1
83690	CRISPLD1	2	1	1	0.1	0.166667	0	0	0	1	0	0	0	1	0	0	0	0	0	0	0	0	0	0	0	0	0
10007	GNPDA1	2	2	0	0.2	0	0	0	0	1	0	0	1	0	0	0	0	0	0	0	0	0	0	0	0	0	0
79649	MAP7D3	2	1	1	0.1	0.166667	0	0	0	1	0	0	0	0	1	0	0	0	0	0	0	0	0	0	0	0	0
140901	STK35	2	1	1	0.1	0.166667	0	0	0	1	0	0	0	0	0	0	0	1	0	0	0	0	0	0	0	0	0
22	ABCB7	2	2	0	0.2	0	0	0	0	1	0	0	1	0	0	0	0	0	0	0	0	0	0	0	0	0	0
51603	METTL13	2	1	1	0.1	0.166667	0	0	0	1	0	0	0	0	1	0	0	0	0	0	0	0	0	0	0	0	0
5594	MAPK1	2	1	0	0.1	0	0	0	0	1	0	0	0	0	0	0	0	0	0	0	0	0	0	1	0	0	0
25814	ATXN10	2	1	1	0.1	0.166667	0	0	0	1	0	0	0	0	1	0	0	0	0	0	0	0	0	0	0	0	0
3276	PRMT1	2	2	0	0.2	0	0	0	0	1	0	0	1	0	0	0	0	0	0	0	0	0	0	0	0	0	0
6628	SNRPB	2	2	0	0.2	0	0	0	0	1	0	0	0	0	0	0	0	0	0	0	0	0	0	0	0	0	1
6204	RPS10	2	1	1	0.1	0.166667	0	0	0	1	0	0	0	0	0	0	0	1	0	0	0	0	0	0	0	0	0
9203	ZMYM3	2	1	1	0.1	0.166667	0	0	0	1	0	0	0	0	1	0	0	0	0	0	0	0	0	0	0	0	0
5478	PPIA	2	1	1	0.1	0.166667	0	0	0	1	0	0	0	0	0	0	0	1	0	0	0	0	0	0	0	0	0
1495	CTNNA1	2	2	0	0.2	0	0	0	0	1	0	0	1	0	0	0	0	0	0	0	0	0	0	0	0	0	0
8325	FZD8	2	1	0	0.1	0	0	0	0	1	0	0	0	0	0	0	0	0	0	0	0	0	0	1	0	0	0
23463	ICMT	2	1	0	0.1	0	0	0	0	1	0	0	0	0	0	0	0	0	0	0	1	0	0	0	0	0	0
84148	KAT8	2	1	1	0.1	0.166667	0	0	0	1	0	0	0	0	0	0	0	1	0	0	0	0	0	0	0	0	0
286527	TMSB15B	2	1	1	0.1	0.166667	0	0	0	1	0	0	0	0	1	0	0	0	0	0	0	0	0	0	0	0	0
4854	NOTCH3	2	1	1	0.1	0.166667	0	0	0	1	0	0	0	0	1	0	0	0	0	0	0	0	0	0	0	0	0
899	CCNF	2	2	0	0.2	0	0	0	0	1	0	0	1	0	0	0	0	0	0	0	0	0	0	0	0	0	0
3156	HMGCR	2	1	1	0.1	0.166667	0	0	0	1	0	0	0	0	1	0	0	0	0	0	0	0	0	0	0	0	0
27316	RBMX	2	1	1	0.1	0.166667	0	0	0	1	0	0	0	0	1	0	0	0	0	0	0	0	0	0	0	0	0
8651	SOCS1	2	2	0	0.2	0	0	0	0	1	0	0	0	0	0	0	0	0	0	0	0	0	0	0	0	0	1
6929	TCF3	2	1	0	0.1	0	0	0	0	0	0	1	0	0	0	0	0	0	0	0	0	0	0	1	0	0	0
3572	IL6ST	2	1	0	0.1	0	0	0	0	0	0	1	0	0	0	0	0	0	0	0	0	0	0	1	0	0	0
3977	LIFR	2	1	0	0.1	0	0	0	0	0	0	1	0	0	0	0	0	0	0	0	0	0	0	1	0	0	0
9421	HAND1	2	1	0	0.1	0	0	0	0	0	0	1	0	0	0	0	0	0	0	0	0	0	0	1	0	0	0
595	CCND1	2	2	0	0.2	0	0	0	0	0	0	0	1	0	0	0	0	0	0	0	0	0	0	0	0	0	1
1019	CDK4	2	1	1	0.1	0.166667	0	0	0	0	0	0	1	0	1	0	0	0	0	0	0	0	0	0	0	0	0
1033	CDKN3	2	1	0	0.1	0	0	0	0	0	0	0	1	0	0	0	0	0	0	0	0	1	0	0	0	0	0
1104	RCC1	2	1	0	0.1	0	0	0	0	0	0	0	1	0	0	0	0	0	0	0	0	1	0	0	0	0	0
2023	ENO1	2	1	1	0.1	0.166667	0	0	0	0	0	0	1	0	1	0	0	0	0	0	0	0	0	0	0	0	0
2091	FBL	2	2	0	0.2	0	0	0	0	0	0	0	1	0	0	0	0	0	0	0	0	0	0	0	0	0	1
2617	GARS	2	1	0	0.1	0	0	0	0	0	0	0	1	0	0	0	0	0	0	0	1	0	0	0	0	0	0
3033	HADH	2	1	1	0.1	0.166667	0	0	0	0	0	0	1	0	1	0	0	0	0	0	0	0	0	0	0	0	0
3065	HDAC1	2	2	0	0.2	0	0	0	0	0	0	0	1	0	0	0	0	0	0	0	0	0	0	0	0	0	1
3376	IARS	2	1	0	0.1	0	0	0	0	0	0	0	1	0	0	0	0	0	0	0	1	0	0	0	0	0	0
4085	MAD2L1	2	1	0	0.1	0	0	0	0	0	0	0	1	0	0	0	0	0	0	0	0	1	0	0	0	0	0
4736	RPL10A	2	1	1	0.1	0.166667	0	0	0	0	0	0	1	0	0	0	0	1	0	0	0	0	0	0	0	0	0
4751	NEK2	2	1	0	0.1	0	0	0	0	0	0	0	1	0	0	0	0	0	0	0	0	1	0	0	0	0	0
5036	PA2G4	2	2	0	0.2	0	0	0	0	0	0	0	1	0	0	0	0	0	0	0	0	0	0	0	0	0	1
5603	MAPK13	2	1	0	0.1	0	0	0	0	0	0	0	1	0	0	0	0	0	0	0	0	0	0	1	0	0	0
6118	RPA2	2	2	0	0.2	0	0	0	0	0	0	0	1	0	0	0	0	0	0	0	0	0	0	0	0	0	1
6137	RPL13	2	1	1	0.1	0.166667	0	0	0	0	0	0	1	0	0	0	0	1	0	0	0	0	0	0	0	0	0
6157	RPL27A	2	1	1	0.1	0.166667	0	0	0	0	0	0	1	0	0	0	0	1	0	0	0	0	0	0	0	0	0
6206	RPS12	2	1	1	0.1	0.166667	0	0	0	0	0	0	1	0	0	0	0	1	0	0	0	0	0	0	0	0	0
6217	RPS16	2	1	1	0.1	0.166667	0	0	0	0	0	0	1	0	0	0	0	1	0	0	0	0	0	0	0	0	0
6790	AURKA	2	2	0	0.2	0	0	0	0	0	0	0	1	0	0	0	0	0	0	0	0	0	0	0	0	0	1
6949	TCOF1	2	2	0	0.2	0	0	0	0	0	0	0	1	0	0	0	0	0	0	0	0	0	0	0	0	0	1
7157	TP53	2	2	0	0.2	0	0	0	0	0	0	0	1	0	0	0	0	0	0	0	0	0	0	0	0	0	1
7307	U2AF1	2	2	0	0.2	0	0	0	0	0	0	0	1	0	0	0	0	0	0	0	0	0	0	0	0	0	1
7341	SUMO1	2	2	0	0.2	0	0	0	0	0	0	0	1	0	0	0	0	0	0	0	0	0	0	0	0	0	1
7465	WEE1	2	2	0	0.2	0	0	0	0	0	0	0	1	0	0	0	0	0	0	0	0	0	0	0	0	0	1
7570	ZNF22	2	1	1	0.1	0.166667	0	0	0	0	0	0	1	0	1	0	0	0	0	0	0	0	0	0	0	0	0
8520	HAT1	2	1	0	0.1	0	0	0	0	0	0	0	1	0	0	0	0	0	0	0	1	0	0	0	0	0	0
9156	EXO1	2	2	0	0.2	0	0	0	0	0	0	0	1	0	0	0	0	0	0	0	0	0	0	0	0	0	1
10051	SMC4	2	1	0	0.1	0	0	0	0	0	0	0	1	0	0	0	0	0	0	0	0	1	0	0	0	0	0
10926	DBF4	2	1	0	0.1	0	0	0	0	0	0	0	1	0	0	0	0	0	0	0	0	1	0	0	0	0	0
10963	STIP1	2	2	0	0.2	0	0	0	0	0	0	0	1	0	0	0	0	0	0	0	0	0	0	0	0	0	1
23708	GSPT2	2	1	1	0.1	0.166667	0	0	0	0	0	0	1	0	1	0	0	0	0	0	0	0	0	0	0	0	0
25804	LSM4	2	2	0	0.2	0	0	0	0	0	0	0	1	0	0	0	0	0	0	0	0	0	0	0	0	0	1
26521	TIMM8B	2	1	1	0.1	0.166667	0	0	0	0	0	0	1	0	0	0	0	1	0	0	0	0	0	0	0	0	0
28957	MRPS28	2	1	1	0.1	0.166667	0	0	0	0	0	0	1	0	1	0	0	0	0	0	0	0	0	0	0	0	0
29127	RACGAP1	2	1	0	0.1	0	0	0	0	0	0	0	1	0	0	0	0	0	0	0	0	1	0	0	0	0	0
54948	MRPL16	2	1	1	0.1	0.166667	0	0	0	0	0	0	1	0	1	0	0	0	0	0	0	0	0	0	0	0	0
57819	LSM2	2	1	1	0.1	0.166667	0	0	0	0	0	0	1	0	1	0	0	0	0	0	0	0	0	0	0	0	0
79084	WDR77	2	2	0	0.2	0	0	0	0	0	0	0	1	0	0	0	0	0	0	0	0	0	0	0	0	0	1
79833	GEMIN6	2	2	0	0.2	0	0	0	0	0	0	0	1	0	0	0	0	0	0	0	0	0	0	0	0	0	1
81611	ANP32E	2	1	1	0.1	0.166667	0	0	0	0	0	0	1	0	0	0	0	1	0	0	0	0	0	0	0	0	0
84908	FAM136A	2	2	0	0.2	0	0	0	0	0	0	0	1	0	0	0	0	0	0	0	0	0	0	0	0	0	1
126328	NDUFA11	2	1	1	0.1	0.166667	0	0	0	0	0	0	1	0	0	0	0	1	0	0	0	0	0	0	0	0	0
3190	HNRNPK	2	2	0	0.2	0	0	0	0	0	0	0	1	0	0	0	0	0	0	0	0	0	0	0	0	0	1
8487	GEMIN2	2	2	0	0.2	0	0	0	0	0	0	0	1	0	0	0	0	0	0	0	0	0	0	0	0	0	1
10975	UQCR11	2	1	1	0.1	0.166667	0	0	0	0	0	0	1	0	0	0	0	1	0	0	0	0	0	0	0	0	0
55651	NHP2	2	1	1	0.1	0.166667	0	0	0	0	0	0	1	0	1	0	0	0	0	0	0	0	0	0	0	0	0
23243	ANKRD28	2	0	2	0	0.333333	0	0	0	0	0	0	0	1	1	0	0	0	0	0	0	0	0	0	0	0	0
374	AREG	2	0	2	0	0.333333	0	0	0	0	0	0	0	1	1	0	0	0	0	0	0	0	0	0	0	0	0
79895	ATP8B4	2	0	2	0	0.333333	0	0	0	0	0	0	0	1	1	0	0	0	0	0	0	0	0	0	0	0	0
1021	CDK6	2	0	2	0	0.333333	0	0	0	0	0	0	0	1	1	0	0	0	0	0	0	0	0	0	0	0	0
2120	ETV6	2	0	2	0	0.333333	0	0	0	0	0	0	0	1	1	0	0	0	0	0	0	0	0	0	0	0	0
2769	GNA15	2	0	2	0	0.333333	0	0	0	0	0	0	0	1	1	0	0	0	0	0	0	0	0	0	0	0	0
57211	GPR126	2	0	2	0	0.333333	0	0	0	0	0	0	0	1	1	0	0	0	0	0	0	0	0	0	0	0	0
3355	HTR1F	2	0	2	0	0.333333	0	0	0	0	0	0	0	1	1	0	0	0	0	0	0	0	0	0	0	0	0
3680	ITGA9	2	0	2	0	0.333333	0	0	0	0	0	0	0	1	1	0	0	0	0	0	0	0	0	0	0	0	0
744	MPPED2	2	0	2	0	0.333333	0	0	0	0	0	0	0	1	1	0	0	0	0	0	0	0	0	0	0	0	0
5136	PDE1A	2	0	2	0	0.333333	0	0	0	0	0	0	0	1	1	0	0	0	0	0	0	0	0	0	0	0	0
23037	PDZD2	2	0	2	0	0.333333	0	0	0	0	0	0	0	1	1	0	0	0	0	0	0	0	0	0	0	0	0
5789	PTPRD	2	0	2	0	0.333333	0	0	0	0	0	0	0	1	1	0	0	0	0	0	0	0	0	0	0	0	0
58528	RRAGD	2	0	2	0	0.333333	0	0	0	0	0	0	0	1	1	0	0	0	0	0	0	0	0	0	0	0	0
6328	SCN3A	2	0	2	0	0.333333	0	0	0	0	0	0	0	1	1	0	0	0	0	0	0	0	0	0	0	0	0
6518	SLC2A5	2	0	2	0	0.333333	0	0	0	0	0	0	0	1	1	0	0	0	0	0	0	0	0	0	0	0	0
23435	TARDBP	2	0	1	0	0.166667	0	0	0	0	0	0	0	1	0	0	0	0	0	0	1	0	0	0	0	0	0
10079	ATP9A	2	0	2	0	0.333333	0	0	0	0	0	0	0	0	1	1	0	0	0	0	0	0	0	0	0	0	0
10329	TMEM5	2	1	1	0.1	0.166667	0	0	0	0	0	0	0	0	1	0	1	0	0	0	0	0	0	0	0	0	0
10419	PRMT5	2	1	1	0.1	0.166667	0	0	0	0	0	0	0	0	1	0	0	0	0	0	0	0	0	0	0	0	1
1047	CLGN	2	0	2	0	0.333333	0	0	0	0	0	0	0	0	1	1	0	0	0	0	0	0	0	0	0	0	0
10873	ME3	2	0	2	0	0.333333	0	0	0	0	0	0	0	0	1	1	0	0	0	0	0	0	0	0	0	0	0
11167	FSTL1	2	0	2	0	0.333333	0	0	0	0	0	0	0	0	1	1	0	0	0	0	0	0	0	0	0	0	0
11231	SEC63	2	0	2	0	0.333333	0	0	0	0	0	0	0	0	1	0	0	1	0	0	0	0	0	0	0	0	0
114112	TXNRD3	2	0	2	0	0.333333	0	0	0	0	0	0	0	0	1	1	0	0	0	0	0	0	0	0	0	0	0
1421	CRYGD	2	0	2	0	0.333333	0	0	0	0	0	0	0	0	1	1	0	0	0	0	0	0	0	0	0	0	0
1612	DAPK1	2	1	1	0.1	0.166667	0	0	0	0	0	0	0	0	1	0	1	0	0	0	0	0	0	0	0	0	0
1652	DDT	2	0	2	0	0.333333	0	0	0	0	0	0	0	0	1	0	0	1	0	0	0	0	0	0	0	0	0
1718	DHCR24	2	1	1	0.1	0.166667	0	0	0	0	0	0	0	0	1	0	0	0	0	0	0	0	0	0	0	0	1
2012	EMP1	2	0	2	0	0.333333	0	0	0	0	0	0	0	0	1	0	0	1	0	0	0	0	0	0	0	0	0
204	AK2	2	0	2	0	0.333333	0	0	0	0	0	0	0	0	1	0	0	1	0	0	0	0	0	0	0	0	0
2078	ERG	2	0	2	0	0.333333	0	0	0	0	0	0	0	0	1	1	0	0	0	0	0	0	0	0	0	0	0
2122	MECOM	2	0	2	0	0.333333	0	0	0	0	0	0	0	0	1	1	0	0	0	0	0	0	0	0	0	0	0
216	ALDH1A1	2	0	2	0	0.333333	0	0	0	0	0	0	0	0	1	1	0	0	0	0	0	0	0	0	0	0	0
2200	FBN1	2	0	2	0	0.333333	0	0	0	0	0	0	0	0	1	1	0	0	0	0	0	0	0	0	0	0	0
22881	ANKRD6	2	0	2	0	0.333333	0	0	0	0	0	0	0	0	1	1	0	0	0	0	0	0	0	0	0	0	0
22903	BTBD3	2	0	2	0	0.333333	0	0	0	0	0	0	0	0	1	1	0	0	0	0	0	0	0	0	0	0	0
23564	DDAH2	2	0	2	0	0.333333	0	0	0	0	0	0	0	0	1	1	0	0	0	0	0	0	0	0	0	0	0
26227	PHGDH	2	1	1	0.1	0.166667	0	0	0	0	0	0	0	0	1	0	0	0	0	0	0	0	0	0	0	0	1
27018	NGFRAP1	2	0	2	0	0.333333	0	0	0	0	0	0	0	0	1	1	0	0	0	0	0	0	0	0	0	0	0
2770	GNAI1	2	0	2	0	0.333333	0	0	0	0	0	0	0	0	1	1	0	0	0	0	0	0	0	0	0	0	0
2983	GUCY1B3	2	0	2	0	0.333333	0	0	0	0	0	0	0	0	1	0	0	1	0	0	0	0	0	0	0	0	0
29899	GPSM2	2	0	1	0	0.166667	0	0	0	0	0	0	0	0	1	0	0	0	0	0	0	1	0	0	0	0	0
30846	EHD2	2	0	2	0	0.333333	0	0	0	0	0	0	0	0	1	1	0	0	0	0	0	0	0	0	0	0	0
3087	HHEX	2	0	1	0	0.166667	0	0	0	0	0	0	0	0	1	0	0	0	0	0	0	0	0	0	1	0	0
3202	HOXA5	2	0	2	0	0.333333	0	0	0	0	0	0	0	0	1	1	0	0	0	0	0	0	0	0	0	0	0
3206	HOXA10	2	0	2	0	0.333333	0	0	0	0	0	0	0	0	1	1	0	0	0	0	0	0	0	0	0	0	0
3251	HPRT1	2	1	1	0.1	0.166667	0	0	0	0	0	0	0	0	1	0	0	0	0	0	0	0	0	0	0	0	1
3315	HSPB1	2	0	2	0	0.333333	0	0	0	0	0	0	0	0	1	1	0	0	0	0	0	0	0	0	0	0	0
3326	HSP90AB1	2	1	1	0.1	0.166667	0	0	0	0	0	0	0	0	1	0	0	0	0	0	0	0	0	0	0	0	1
339229	OXLD1	2	0	2	0	0.333333	0	0	0	0	0	0	0	0	1	0	0	1	0	0	0	0	0	0	0	0	0
3480	IGF1R	2	0	1	0	0.166667	0	0	0	0	0	0	0	0	1	0	0	0	0	0	0	0	0	1	0	0	0
3595	IL12RB2	2	0	2	0	0.333333	0	0	0	0	0	0	0	0	1	1	0	0	0	0	0	0	0	0	0	0	0
3606	IL18	2	0	2	0	0.333333	0	0	0	0	0	0	0	0	1	1	0	0	0	0	0	0	0	0	0	0	0
3915	LAMC1	2	0	2	0	0.333333	0	0	0	0	0	0	0	0	1	0	0	1	0	0	0	0	0	0	0	0	0
3925	STMN1	2	0	1	0	0.166667	0	0	0	0	0	0	0	0	1	0	0	0	0	0	0	1	0	0	0	0	0
4086	SMAD1	2	0	1	0	0.166667	0	0	0	0	0	0	0	0	1	0	0	0	0	0	0	0	0	1	0	0	0
4692	NDN	2	0	2	0	0.333333	0	0	0	0	0	0	0	0	1	1	0	0	0	0	0	0	0	0	0	0	0
51232	CRIM1	2	1	1	0.1	0.166667	0	0	0	0	0	0	0	0	1	0	1	0	0	0	0	0	0	0	0	0	0
51477	ISYNA1	2	0	2	0	0.333333	0	0	0	0	0	0	0	0	1	1	0	0	0	0	0	0	0	0	0	0	0
5270	SERPINE2	2	0	2	0	0.333333	0	0	0	0	0	0	0	0	1	1	0	0	0	0	0	0	0	0	0	0	0
5332	PLCB4	2	0	2	0	0.333333	0	0	0	0	0	0	0	0	1	1	0	0	0	0	0	0	0	0	0	0	0
5352	PLOD2	2	0	2	0	0.333333	0	0	0	0	0	0	0	0	1	1	0	0	0	0	0	0	0	0	0	0	0
5425	POLD2	2	1	1	0.1	0.166667	0	0	0	0	0	0	0	0	1	0	0	0	0	0	0	0	0	0	0	0	1
54433	GAR1	2	1	1	0.1	0.166667	0	0	0	0	0	0	0	0	1	0	0	0	0	0	0	0	0	0	0	0	1
55190	NUDT11	2	0	2	0	0.333333	0	0	0	0	0	0	0	0	1	1	0	0	0	0	0	0	0	0	0	0	0
55888	ZKSCAN7	2	0	1	0	0.166667	0	0	0	0	0	0	0	0	1	0	0	0	0	0	1	0	0	0	0	0	0
5687	PSMA6	2	1	1	0.1	0.166667	0	0	0	0	0	0	0	0	1	0	0	0	0	0	0	0	0	0	0	0	1
57088	PLSCR4	2	0	2	0	0.333333	0	0	0	0	0	0	0	0	1	1	0	0	0	0	0	0	0	0	0	0	0
57523	NYNRIN	2	0	2	0	0.333333	0	0	0	0	0	0	0	0	1	1	0	0	0	0	0	0	0	0	0	0	0
58504	ARHGAP22	2	0	2	0	0.333333	0	0	0	0	0	0	0	0	1	1	0	0	0	0	0	0	0	0	0	0	0
5898	RALA	2	0	2	0	0.333333	0	0	0	0	0	0	0	0	1	0	0	1	0	0	0	0	0	0	0	0	0
594	BCKDHB	2	0	1	0	0.166667	0	0	0	0	0	0	0	0	1	0	0	0	0	0	1	0	0	0	0	0	0
6171	RPL41	2	0	2	0	0.333333	0	0	0	0	0	0	0	0	1	0	0	1	0	0	0	0	0	0	0	0	0
6414	SEPP1	2	0	2	0	0.333333	0	0	0	0	0	0	0	0	1	1	0	0	0	0	0	0	0	0	0	0	0
6809	STX3	2	1	1	0.1	0.166667	0	0	0	0	0	0	0	0	1	0	0	0	0	0	0	0	0	0	0	0	1
6894	TARBP1	2	0	2	0	0.333333	0	0	0	0	0	0	0	0	1	1	0	0	0	0	0	0	0	0	0	0	0
7035	TFPI	2	0	2	0	0.333333	0	0	0	0	0	0	0	0	1	1	0	0	0	0	0	0	0	0	0	0	0
710	SERPING1	2	0	2	0	0.333333	0	0	0	0	0	0	0	0	1	1	0	0	0	0	0	0	0	0	0	0	0
7292	TNFSF4	2	0	2	0	0.333333	0	0	0	0	0	0	0	0	1	1	0	0	0	0	0	0	0	0	0	0	0
7295	TXN	2	0	2	0	0.333333	0	0	0	0	0	0	0	0	1	0	0	1	0	0	0	0	0	0	0	0	0
7371	UCK2	2	0	1	0	0.166667	0	0	0	0	0	0	0	0	1	0	0	0	0	0	0	1	0	0	0	0	0
7381	UQCRB	2	0	2	0	0.333333	0	0	0	0	0	0	0	0	1	0	0	1	0	0	0	0	0	0	0	0	0
7586	ZKSCAN1	2	0	2	0	0.333333	0	0	0	0	0	0	0	0	1	0	0	1	0	0	0	0	0	0	0	0	0
783	CACNB2	2	0	2	0	0.333333	0	0	0	0	0	0	0	0	1	1	0	0	0	0	0	0	0	0	0	0	0
79077	DCTPP1	2	1	1	0.1	0.166667	0	0	0	0	0	0	0	0	1	0	0	0	0	0	0	0	0	0	0	0	1
80205	CHD9	2	0	2	0	0.333333	0	0	0	0	0	0	0	0	1	0	0	1	0	0	0	0	0	0	0	0	0
81691	LOC81691	2	0	2	0	0.333333	0	0	0	0	0	0	0	0	1	1	0	0	0	0	0	0	0	0	0	0	0
8204	NRIP1	2	0	2	0	0.333333	0	0	0	0	0	0	0	0	1	1	0	0	0	0	0	0	0	0	0	0	0
8323	FZD6	2	0	1	0	0.166667	0	0	0	0	0	0	0	0	1	0	0	0	0	0	0	0	0	1	0	0	0
8503	PIK3R3	2	0	1	0	0.166667	0	0	0	0	0	0	0	0	1	0	0	0	0	0	0	0	0	1	0	0	0
8644	AKR1C3	2	0	2	0	0.333333	0	0	0	0	0	0	0	0	1	1	0	0	0	0	0	0	0	0	0	0	0
8848	TSC22D1	2	0	1	0	0.166667	0	0	0	0	0	0	0	0	1	0	0	0	0	0	0	0	0	0	1	0	0
900	CCNG1	2	0	1	0	0.166667	0	0	0	0	0	0	0	0	1	0	0	0	0	0	1	0	0	0	0	0	0
9200	PTPLA	2	0	2	0	0.333333	0	0	0	0	0	0	0	0	1	1	0	0	0	0	0	0	0	0	0	0	0
9477	MED20	2	0	1	0	0.166667	0	0	0	0	0	0	0	0	1	0	0	0	0	0	1	0	0	0	0	0	0
9619	ABCG1	2	0	1	0	0.166667	0	0	0	0	0	0	0	0	1	0	0	0	0	0	1	0	0	0	0	0	0
9743	ARHGAP32	2	0	2	0	0.333333	0	0	0	0	0	0	0	0	1	0	0	1	0	0	0	0	0	0	0	0	0
9767	JADE3	2	0	2	0	0.333333	0	0	0	0	0	0	0	0	1	1	0	0	0	0	0	0	0	0	0	0	0
5621	PRNP	2	2	0	0.2	0	0	0	0	0	0	0	0	0	0	0	1	0	0	0	0	0	0	0	0	0	1
6635	SNRPE	2	1	1	0.1	0.166667	0	0	0	0	0	0	0	0	0	0	0	1	0	0	0	0	0	0	0	0	1
6303	SAT1	2	0	1	0	0.166667	0	0	0	0	0	0	0	0	0	0	0	1	0	0	1	0	0	0	0	0	0
57722	IGDCC4	2	0	2	0	0.333333	0	0	0	0	0	0	0	0	0	0	0	1	0	1	0	0	0	0	0	0	0
3837	KPNB1	2	1	1	0.1	0.166667	0	0	0	0	0	0	0	0	0	0	0	1	0	0	0	0	0	0	0	0	1
3716	JAK1	2	0	1	0	0.166667	0	0	0	0	0	0	0	0	0	0	0	1	0	0	0	0	0	1	0	0	0
3626	INHBC	2	0	1	0	0.166667	0	0	0	0	0	0	0	0	0	0	0	1	0	0	0	0	0	1	0	0	0
3093	UBE2K	2	0	1	0	0.166667	0	0	0	0	0	0	0	0	0	0	0	1	0	0	1	0	0	0	0	0	0
120114	FAT3	2	0	2	0	0.333333	0	0	0	0	0	0	0	0	0	0	0	1	0	1	0	0	0	0	0	0	0
1291	COL6A1	2	0	2	0	0.333333	0	0	0	0	0	0	0	0	0	0	0	1	1	0	0	0	0	0	0	0	0
10468	FST	2	0	1	0	0.166667	0	0	0	0	0	0	0	0	0	0	0	0	1	0	1	0	0	0	0	0	0
3037	HAS2	2	0	1	0	0.166667	0	0	0	0	0	0	0	0	0	0	0	0	1	0	1	0	0	0	0	0	0
6662	SOX9	2	0	2	0	0.333333	0	0	0	0	0	0	0	0	0	0	0	0	1	1	0	0	0	0	0	0	0
7474	WNT5A	2	0	1	0	0.166667	0	0	0	0	0	0	0	0	0	0	0	0	1	0	0	0	0	1	0	0	0
5080	PAX6	2	0	1	0	0.166667	0	0	0	0	0	0	0	0	0	0	0	0	0	1	0	0	0	1	0	0	0
54908	SPDL1	2	0	0	0	0	0	0	0	0	0	0	0	0	0	0	0	0	0	0	1	1	0	0	0	0	0
83729	INHBE	2	0	0	0	0	0	0	0	0	0	0	0	0	0	0	0	0	0	0	1	0	0	1	0	0	0
2535	FZD2	2	0	0	0	0	0	0	0	0	0	0	0	0	0	0	0	0	0	0	1	0	0	1	0	0	0
4087	SMAD2	2	0	0	0	0	0	0	0	0	0	0	0	0	0	0	0	0	0	0	0	0	0	1	1	0	0
4089	SMAD4	2	0	0	0	0	0	0	0	0	0	0	0	0	0	0	0	0	0	0	0	0	0	1	1	0	0
56916	SMARCAD1	2	1	0	0.1	0	0	0	0	0	0	0	0	0	0	0	0	0	0	0	0	0	0	1	0	0	1
86	ACTL6A	1	0	0	0	0	0	0	0	0	0	0	0	0	0	0	0	0	0	0	0	0	0	0	0	1	0
192669	AGO3	1	0	0	0	0	0	0	0	0	0	0	0	0	0	0	0	0	0	0	0	0	0	0	0	1	0
8289	ARID1A	1	0	0	0	0	0	0	0	0	0	0	0	0	0	0	0	0	0	0	0	0	0	0	0	1	0
57492	ARID1B	1	0	0	0	0	0	0	0	0	0	0	0	0	0	0	0	0	0	0	0	0	0	0	0	1	0
83858	ATAD3B	1	0	0	0	0	0	0	0	0	0	0	0	0	0	0	0	0	0	0	0	0	0	0	0	1	0
10533	ATG7	1	0	0	0	0	0	0	0	0	0	0	0	0	0	0	0	0	0	0	0	0	0	0	0	1	0
10538	BATF	1	0	0	0	0	0	0	0	0	0	0	0	0	0	0	0	0	0	0	0	0	0	0	0	1	0
79577	CDC73	1	0	0	0	0	0	0	0	0	0	0	0	0	0	0	0	0	0	0	0	0	0	0	0	1	0
55038	CDCA4	1	0	0	0	0	0	0	0	0	0	0	0	0	0	0	0	0	0	0	0	0	0	0	0	1	0
1017	CDK2	1	0	0	0	0	0	0	0	0	0	0	0	0	0	0	0	0	0	0	0	0	0	0	0	1	0
1026	CDKN1A	1	0	0	0	0	0	0	0	0	0	0	0	0	0	0	0	0	0	0	0	0	0	0	0	1	0
55118	CRTAC1	1	0	0	0	0	0	0	0	0	0	0	0	0	0	0	0	0	0	0	0	0	0	0	0	1	0
9646	CTR9	1	0	0	0	0	0	0	0	0	0	0	0	0	0	0	0	0	0	0	0	0	0	0	0	1	0
7852	CXCR4	1	0	0	0	0	0	0	0	0	0	0	0	0	0	0	0	0	0	0	0	0	0	0	0	1	0
51523	CXXC5	1	0	0	0	0	0	0	0	0	0	0	0	0	0	0	0	0	0	0	0	0	0	0	0	1	0
81501	DCSTAMP	1	0	0	0	0	0	0	0	0	0	0	0	0	0	0	0	0	0	0	0	0	0	0	0	1	0
54487	DGCR8	1	0	0	0	0	0	0	0	0	0	0	0	0	0	0	0	0	0	0	0	0	0	0	0	1	0
8193	DPF1	1	0	0	0	0	0	0	0	0	0	0	0	0	0	0	0	0	0	0	0	0	0	0	0	1	0
8110	DPF3	1	0	0	0	0	0	0	0	0	0	0	0	0	0	0	0	0	0	0	0	0	0	0	0	1	0
1984	EIF5A	1	0	0	0	0	0	0	0	0	0	0	0	0	0	0	0	0	0	0	0	0	0	0	0	1	0
56648	EIF5A2	1	0	0	0	0	0	0	0	0	0	0	0	0	0	0	0	0	0	0	0	0	0	0	0	1	0
143244	EIF5AL1	1	0	0	0	0	0	0	0	0	0	0	0	0	0	0	0	0	0	0	0	0	0	0	0	1	0
1994	ELAVL1	1	0	0	0	0	0	0	0	0	0	0	0	0	0	0	0	0	0	0	0	0	0	0	0	1	0
80237	ELL3	1	0	0	0	0	0	0	0	0	0	0	0	0	0	0	0	0	0	0	0	0	0	0	0	1	0
3266	ERAS	1	0	0	0	0	0	0	0	0	0	0	0	0	0	0	0	0	0	0	0	0	0	0	0	1	0
2077	ERF	1	0	0	0	0	0	0	0	0	0	0	0	0	0	0	0	0	0	0	0	0	0	0	0	1	0
2145	EZH1	1	0	0	0	0	0	0	0	0	0	0	0	0	0	0	0	0	0	0	0	0	0	0	0	1	0
2146	EZH2	1	0	0	0	0	0	0	0	0	0	0	0	0	0	0	0	0	0	0	0	0	0	0	0	1	0
2242	FES	1	0	0	0	0	0	0	0	0	0	0	0	0	0	0	0	0	0	0	0	0	0	0	0	1	0
56941	HMCES	1	0	0	0	0	0	0	0	0	0	0	0	0	0	0	0	0	0	0	0	0	0	0	0	1	0
57824	HMHB1	1	0	0	0	0	0	0	0	0	0	0	0	0	0	0	0	0	0	0	0	0	0	0	0	1	0
284293	HMSD	1	0	0	0	0	0	0	0	0	0	0	0	0	0	0	0	0	0	0	0	0	0	0	0	1	0
3589	IL11	1	0	0	0	0	0	0	0	0	0	0	0	0	0	0	0	0	0	0	0	0	0	0	0	1	0
3562	IL3	1	0	0	0	0	0	0	0	0	0	0	0	0	0	0	0	0	0	0	0	0	0	0	0	1	0
3791	KDR	1	0	0	0	0	0	0	0	0	0	0	0	0	0	0	0	0	0	0	0	0	0	0	0	1	0
55904	KMT2E	1	0	0	0	0	0	0	0	0	0	0	0	0	0	0	0	0	0	0	0	0	0	0	0	1	0
123169	LEO1	1	0	0	0	0	0	0	0	0	0	0	0	0	0	0	0	0	0	0	0	0	0	0	0	1	0
8549	LGR5	1	0	0	0	0	0	0	0	0	0	0	0	0	0	0	0	0	0	0	0	0	0	0	0	1	0
59352	LGR6	1	0	0	0	0	0	0	0	0	0	0	0	0	0	0	0	0	0	0	0	0	0	0	0	1	0
23499	MACF1	1	0	0	0	0	0	0	0	0	0	0	0	0	0	0	0	0	0	0	0	0	0	0	0	1	0
57721	METTL14	1	0	0	0	0	0	0	0	0	0	0	0	0	0	0	0	0	0	0	0	0	0	0	0	1	0
4440	MSI1	1	0	0	0	0	0	0	0	0	0	0	0	0	0	0	0	0	0	0	0	0	0	0	0	1	0
4486	MST1R	1	0	0	0	0	0	0	0	0	0	0	0	0	0	0	0	0	0	0	0	0	0	0	0	1	0
64005	MYO1G	1	0	0	0	0	0	0	0	0	0	0	0	0	0	0	0	0	0	0	0	0	0	0	0	1	0
339345	NANOS2	1	0	0	0	0	0	0	0	0	0	0	0	0	0	0	0	0	0	0	0	0	0	0	0	1	0
51701	NLK	1	0	0	0	0	0	0	0	0	0	0	0	0	0	0	0	0	0	0	0	0	0	0	0	1	0
190	NR0B1	1	0	0	0	0	0	0	0	0	0	0	0	0	0	0	0	0	0	0	0	0	0	0	0	1	0
7181	NR2C1	1	0	0	0	0	0	0	0	0	0	0	0	0	0	0	0	0	0	0	0	0	0	0	0	1	0
7182	NR2C2	1	0	0	0	0	0	0	0	0	0	0	0	0	0	0	0	0	0	0	0	0	0	0	0	1	0
23569	PADI4	1	0	0	0	0	0	0	0	0	0	0	0	0	0	0	0	0	0	0	0	0	0	0	0	1	0
54623	PAF1	1	0	0	0	0	0	0	0	0	0	0	0	0	0	0	0	0	0	0	0	0	0	0	0	1	0
26147	PHF19	1	0	0	0	0	0	0	0	0	0	0	0	0	0	0	0	0	0	0	0	0	0	0	0	1	0
55124	PIWIL2	1	0	0	0	0	0	0	0	0	0	0	0	0	0	0	0	0	0	0	0	0	0	0	0	1	0
54496	PRMT7	1	0	0	0	0	0	0	0	0	0	0	0	0	0	0	0	0	0	0	0	0	0	0	0	1	0
8000	PSCA	1	0	0	0	0	0	0	0	0	0	0	0	0	0	0	0	0	0	0	0	0	0	0	0	1	0
374462	PTPRQ	1	0	0	0	0	0	0	0	0	0	0	0	0	0	0	0	0	0	0	0	0	0	0	0	1	0
54894	RNF43	1	0	0	0	0	0	0	0	0	0	0	0	0	0	0	0	0	0	0	0	0	0	0	0	1	0
23168	RTF1	1	0	0	0	0	0	0	0	0	0	0	0	0	0	0	0	0	0	0	0	0	0	0	0	1	0
860	RUNX2	1	0	0	0	0	0	0	0	0	0	0	0	0	0	0	0	0	0	0	0	0	0	0	0	1	0
6598	SMARCB1	1	0	0	0	0	0	0	0	0	0	0	0	0	0	0	0	0	0	0	0	0	0	0	0	1	0
6602	SMARCD1	1	0	0	0	0	0	0	0	0	0	0	0	0	0	0	0	0	0	0	0	0	0	0	0	1	0
6604	SMARCD3	1	0	0	0	0	0	0	0	0	0	0	0	0	0	0	0	0	0	0	0	0	0	0	0	1	0
6605	SMARCE1	1	0	0	0	0	0	0	0	0	0	0	0	0	0	0	0	0	0	0	0	0	0	0	0	1	0
161742	SPRED1	1	0	0	0	0	0	0	0	0	0	0	0	0	0	0	0	0	0	0	0	0	0	0	0	1	0
6788	STK3	1	0	0	0	0	0	0	0	0	0	0	0	0	0	0	0	0	0	0	0	0	0	0	0	1	0
6911	TBX6	1	0	0	0	0	0	0	0	0	0	0	0	0	0	0	0	0	0	0	0	0	0	0	0	1	0
129787	TMEM18	1	0	0	0	0	0	0	0	0	0	0	0	0	0	0	0	0	0	0	0	0	0	0	0	1	0
7114	TMSB4X	1	0	0	0	0	0	0	0	0	0	0	0	0	0	0	0	0	0	0	0	0	0	0	0	1	0
8626	TP63	1	0	0	0	0	0	0	0	0	0	0	0	0	0	0	0	0	0	0	0	0	0	0	0	1	0
57602	USP36	1	0	0	0	0	0	0	0	0	0	0	0	0	0	0	0	0	0	0	0	0	0	0	0	1	0
80349	WDR61	1	0	0	0	0	0	0	0	0	0	0	0	0	0	0	0	0	0	0	0	0	0	0	0	1	0
11060	WWP2	1	0	0	0	0	0	0	0	0	0	0	0	0	0	0	0	0	0	0	0	0	0	0	0	1	0
25937	WWTR1	1	0	0	0	0	0	0	0	0	0	0	0	0	0	0	0	0	0	0	0	0	0	0	0	1	0
56252	YLPM1	1	0	0	0	0	0	0	0	0	0	0	0	0	0	0	0	0	0	0	0	0	0	0	0	1	0
23051	ZHX3	1	0	0	0	0	0	0	0	0	0	0	0	0	0	0	0	0	0	0	0	0	0	0	0	1	0
23192	ATG4B	1	1	0	0.1	0	1	0	0	0	0	0	0	0	0	0	0	0	0	0	0	0	0	0	0	0	0
85003	BFSP2-AS1	1	1	0	0.1	0	1	0	0	0	0	0	0	0	0	0	0	0	0	0	0	0	0	0	0	0	0
151887	CCDC80	1	1	0	0.1	0	1	0	0	0	0	0	0	0	0	0	0	0	0	0	0	0	0	0	0	0	0
7555	CNBP	1	1	0	0.1	0	1	0	0	0	0	0	0	0	0	0	0	0	0	0	0	0	0	0	0	0	0
9267	CYTH1	1	1	0	0.1	0	1	0	0	0	0	0	0	0	0	0	0	0	0	0	0	0	0	0	0	0	0
8663	EIF3C	1	1	0	0.1	0	1	0	0	0	0	0	0	0	0	0	0	0	0	0	0	0	0	0	0	0	0
51359	ERVH-4	1	1	0	0.1	0	1	0	0	0	0	0	0	0	0	0	0	0	0	0	0	0	0	0	0	0	0
90625	ERVH48-1	1	1	0	0.1	0	1	0	0	0	0	0	0	0	0	0	0	0	0	0	0	0	0	0	0	0	0
81502	HM13	1	1	0	0.1	0	1	0	0	0	0	0	0	0	0	0	0	0	0	0	0	0	0	0	0	0	0
57470	LRRC47	1	1	0	0.1	0	1	0	0	0	0	0	0	0	0	0	0	0	0	0	0	0	0	0	0	0	0
4223	MEOX2	1	1	0	0.1	0	1	0	0	0	0	0	0	0	0	0	0	0	0	0	0	0	0	0	0	0	0
57552	NCEH1	1	1	0	0.1	0	1	0	0	0	0	0	0	0	0	0	0	0	0	0	0	0	0	0	0	0	0
199713	NLRP7	1	1	0	0.1	0	1	0	0	0	0	0	0	0	0	0	0	0	0	0	0	0	0	0	0	0	0
79031	PDCL3	1	1	0	0.1	0	1	0	0	0	0	0	0	0	0	0	0	0	0	0	0	0	0	0	0	0	0
81892	SLIRP	1	1	0	0.1	0	1	0	0	0	0	0	0	0	0	0	0	0	0	0	0	0	0	0	0	0	0
9238	TBRG4	1	1	0	0.1	0	1	0	0	0	0	0	0	0	0	0	0	0	0	0	0	0	0	0	0	0	0
51493	RTCB	1	1	0	0.1	0	1	0	0	0	0	0	0	0	0	0	0	0	0	0	0	0	0	0	0	0	0
51067	YARS2	1	1	0	0.1	0	1	0	0	0	0	0	0	0	0	0	0	0	0	0	0	0	0	0	0	0	0
127396	ZNF684	1	1	0	0.1	0	1	0	0	0	0	0	0	0	0	0	0	0	0	0	0	0	0	0	0	0	0
125893	ZNF816	1	1	0	0.1	0	1	0	0	0	0	0	0	0	0	0	0	0	0	0	0	0	0	0	0	0	0
10410	IFITM3	1	1	0	0.1	0	1	0	0	0	0	0	0	0	0	0	0	0	0	0	0	0	0	0	0	0	0
10487	CAP1	1	1	0	0.1	0	1	0	0	0	0	0	0	0	0	0	0	0	0	0	0	0	0	0	0	0	0
10726	NUDC	1	1	0	0.1	0	1	0	0	0	0	0	0	0	0	0	0	0	0	0	0	0	0	0	0	0	0
136	ADORA2B	1	1	0	0.1	0	1	0	0	0	0	0	0	0	0	0	0	0	0	0	0	0	0	0	0	0	0
1378	CR1	1	1	0	0.1	0	1	0	0	0	0	0	0	0	0	0	0	0	0	0	0	0	0	0	0	0	0
1460	CSNK2B	1	1	0	0.1	0	1	0	0	0	0	0	0	0	0	0	0	0	0	0	0	0	0	0	0	0	0
1756	DMD	1	1	0	0.1	0	1	0	0	0	0	0	0	0	0	0	0	0	0	0	0	0	0	0	0	0	0
29074	MRPL18	1	1	0	0.1	0	1	0	0	0	0	0	0	0	0	0	0	0	0	0	0	0	0	0	0	0	0
29947	DNMT3L	1	1	0	0.1	0	1	0	0	0	0	0	0	0	0	0	0	0	0	0	0	0	0	0	0	0	0
3002	GZMB	1	1	0	0.1	0	1	0	0	0	0	0	0	0	0	0	0	0	0	0	0	0	0	0	0	0	0
3106	HLA-B	1	1	0	0.1	0	1	0	0	0	0	0	0	0	0	0	0	0	0	0	0	0	0	0	0	0	0
3134	HLA-F	1	1	0	0.1	0	1	0	0	0	0	0	0	0	0	0	0	0	0	0	0	0	0	0	0	0	0
3364	HUS1	1	1	0	0.1	0	1	0	0	0	0	0	0	0	0	0	0	0	0	0	0	0	0	0	0	0	0
3939	LDHA	1	1	0	0.1	0	1	0	0	0	0	0	0	0	0	0	0	0	0	0	0	0	0	0	0	0	0
4489	MT1A	1	1	0	0.1	0	1	0	0	0	0	0	0	0	0	0	0	0	0	0	0	0	0	0	0	0	0
4677	NARS	1	1	0	0.1	0	1	0	0	0	0	0	0	0	0	0	0	0	0	0	0	0	0	0	0	0	0
479	ATP12A	1	1	0	0.1	0	1	0	0	0	0	0	0	0	0	0	0	0	0	0	0	0	0	0	0	0	0
506	ATP5B	1	1	0	0.1	0	1	0	0	0	0	0	0	0	0	0	0	0	0	0	0	0	0	0	0	0	0
509	ATP5C1	1	1	0	0.1	0	1	0	0	0	0	0	0	0	0	0	0	0	0	0	0	0	0	0	0	0	0
51649	MRPS23	1	1	0	0.1	0	1	0	0	0	0	0	0	0	0	0	0	0	0	0	0	0	0	0	0	0	0
55629	PNRC2	1	1	0	0.1	0	1	0	0	0	0	0	0	0	0	0	0	0	0	0	0	0	0	0	0	0	0
5634	PRPS2	1	1	0	0.1	0	1	0	0	0	0	0	0	0	0	0	0	0	0	0	0	0	0	0	0	0	0
5691	PSMB3	1	1	0	0.1	0	1	0	0	0	0	0	0	0	0	0	0	0	0	0	0	0	0	0	0	0	0
57103	C12orf5	1	1	0	0.1	0	1	0	0	0	0	0	0	0	0	0	0	0	0	0	0	0	0	0	0	0	0
57134	MAN1C1	1	1	0	0.1	0	1	0	0	0	0	0	0	0	0	0	0	0	0	0	0	0	0	0	0	0	0
5716	PSMD10	1	1	0	0.1	0	1	0	0	0	0	0	0	0	0	0	0	0	0	0	0	0	0	0	0	0	0
57621	ZBTB2	1	1	0	0.1	0	1	0	0	0	0	0	0	0	0	0	0	0	0	0	0	0	0	0	0	0	0
5935	RBM3	1	1	0	0.1	0	1	0	0	0	0	0	0	0	0	0	0	0	0	0	0	0	0	0	0	0	0
7167	TPI1	1	1	0	0.1	0	1	0	0	0	0	0	0	0	0	0	0	0	0	0	0	0	0	0	0	0	0
7378	UPP1	1	1	0	0.1	0	1	0	0	0	0	0	0	0	0	0	0	0	0	0	0	0	0	0	0	0	0
7453	WARS	1	1	0	0.1	0	1	0	0	0	0	0	0	0	0	0	0	0	0	0	0	0	0	0	0	0	0
7633	ZNF79	1	1	0	0.1	0	1	0	0	0	0	0	0	0	0	0	0	0	0	0	0	0	0	0	0	0	0
7940	LST1	1	1	0	0.1	0	1	0	0	0	0	0	0	0	0	0	0	0	0	0	0	0	0	0	0	0	0
8034	SLC25A16	1	1	0	0.1	0	1	0	0	0	0	0	0	0	0	0	0	0	0	0	0	0	0	0	0	0	0
8419	BFSP2	1	1	0	0.1	0	1	0	0	0	0	0	0	0	0	0	0	0	0	0	0	0	0	0	0	0	0
8459	TPST2	1	1	0	0.1	0	1	0	0	0	0	0	0	0	0	0	0	0	0	0	0	0	0	0	0	0	0
874	CBR3	1	1	0	0.1	0	1	0	0	0	0	0	0	0	0	0	0	0	0	0	0	0	0	0	0	0	0
8803	SUCLA2	1	1	0	0.1	0	1	0	0	0	0	0	0	0	0	0	0	0	0	0	0	0	0	0	0	0	0
9070	ASH2L	1	1	0	0.1	0	1	0	0	0	0	0	0	0	0	0	0	0	0	0	0	0	0	0	0	0	0
9118	INA	1	1	0	0.1	0	1	0	0	0	0	0	0	0	0	0	0	0	0	0	0	0	0	0	0	0	0
9668	ZNF432	1	1	0	0.1	0	1	0	0	0	0	0	0	0	0	0	0	0	0	0	0	0	0	0	0	0	0
10473	HMGN4	1	1	0	0.1	0	1	0	0	0	0	0	0	0	0	0	0	0	0	0	0	0	0	0	0	0	0
11061	LECT1	1	1	0	0.1	0	0	1	0	0	0	0	0	0	0	0	0	0	0	0	0	0	0	0	0	0	0
90806	ANGEL2	1	1	0	0.1	0	0	1	0	0	0	0	0	0	0	0	0	0	0	0	0	0	0	0	0	0	0
27231	NMRK2	1	1	0	0.1	0	0	1	0	0	0	0	0	0	0	0	0	0	0	0	0	0	0	0	0	0	0
249	ALPL	1	1	0	0.1	0	0	1	0	0	0	0	0	0	0	0	0	0	0	0	0	0	0	0	0	0	0
8239	USP9X	1	1	0	0.1	0	0	1	0	0	0	0	0	0	0	0	0	0	0	0	0	0	0	0	0	0	0
9074	CLDN6	1	1	0	0.1	0	0	1	0	0	0	0	0	0	0	0	0	0	0	0	0	0	0	0	0	0	0
55237	VRTN	1	1	0	0.1	0	0	1	0	0	0	0	0	0	0	0	0	0	0	0	0	0	0	0	0	0	0
55003	PAK1IP1	1	1	0	0.1	0	0	1	0	0	0	0	0	0	0	0	0	0	0	0	0	0	0	0	0	0	0
51104	ABHD17B	1	1	0	0.1	0	0	1	0	0	0	0	0	0	0	0	0	0	0	0	0	0	0	0	0	0	0
51574	LARP7	1	1	0	0.1	0	0	1	0	0	0	0	0	0	0	0	0	0	0	0	0	0	0	0	0	0	0
120071	GYLTL1B	1	1	0	0.1	0	0	1	0	0	0	0	0	0	0	0	0	0	0	0	0	0	0	0	0	0	0
54892	NCAPG2	1	1	0	0.1	0	0	1	0	0	0	0	0	0	0	0	0	0	0	0	0	0	0	0	0	0	0
5919	RARRES2	1	1	0	0.1	0	0	1	0	0	0	0	0	0	0	0	0	0	0	0	0	0	0	0	0	0	0
1763	DNA2	1	1	0	0.1	0	0	1	0	0	0	0	0	0	0	0	0	0	0	0	0	0	0	0	0	0	0
10874	NMU	1	1	0	0.1	0	0	1	0	0	0	0	0	0	0	0	0	0	0	0	0	0	0	0	0	0	0
8433	UTF1	1	1	0	0.1	0	0	1	0	0	0	0	0	0	0	0	0	0	0	0	0	0	0	0	0	0	0
51582	AZIN1	1	1	0	0.1	0	0	1	0	0	0	0	0	0	0	0	0	0	0	0	0	0	0	0	0	0	0
25926	NOL11	1	1	0	0.1	0	0	1	0	0	0	0	0	0	0	0	0	0	0	0	0	0	0	0	0	0	0
7804	LRP8	1	1	0	0.1	0	0	1	0	0	0	0	0	0	0	0	0	0	0	0	0	0	0	0	0	0	0
9908	G3BP2	1	1	0	0.1	0	0	1	0	0	0	0	0	0	0	0	0	0	0	0	0	0	0	0	0	0	0
6422	SFRP1	1	1	0	0.1	0	0	1	0	0	0	0	0	0	0	0	0	0	0	0	0	0	0	0	0	0	0
8615	USO1	1	1	0	0.1	0	0	1	0	0	0	0	0	0	0	0	0	0	0	0	0	0	0	0	0	0	0
23534	TNPO3	1	1	0	0.1	0	0	1	0	0	0	0	0	0	0	0	0	0	0	0	0	0	0	0	0	0	0
10643	IGF2BP3	1	1	0	0.1	0	0	1	0	0	0	0	0	0	0	0	0	0	0	0	0	0	0	0	0	0	0
3818	KLKB1	1	1	0	0.1	0	0	1	0	0	0	0	0	0	0	0	0	0	0	0	0	0	0	0	0	0	0
65981	CAPRIN2	1	1	0	0.1	0	0	1	0	0	0	0	0	0	0	0	0	0	0	0	0	0	0	0	0	0	0
9350	CER1	1	1	0	0.1	0	0	1	0	0	0	0	0	0	0	0	0	0	0	0	0	0	0	0	0	0	0
3730	KAL1	1	1	0	0.1	0	0	1	0	0	0	0	0	0	0	0	0	0	0	0	0	0	0	0	0	0	0
2258	FGF13	1	1	0	0.1	0	0	1	0	0	0	0	0	0	0	0	0	0	0	0	0	0	0	0	0	0	0
79012	CAMKV	1	1	0	0.1	0	0	1	0	0	0	0	0	0	0	0	0	0	0	0	0	0	0	0	0	0	0
1690	COCH	1	1	0	0.1	0	0	1	0	0	0	0	0	0	0	0	0	0	0	0	0	0	0	0	0	0	0
55759	WDR12	1	1	0	0.1	0	0	1	0	0	0	0	0	0	0	0	0	0	0	0	0	0	0	0	0	0	0
9143	SYNGR3	1	1	0	0.1	0	0	1	0	0	0	0	0	0	0	0	0	0	0	0	0	0	0	0	0	0	0
10149	GPR64	1	1	0	0.1	0	0	1	0	0	0	0	0	0	0	0	0	0	0	0	0	0	0	0	0	0	0
2558	GABRA5	1	1	0	0.1	0	0	1	0	0	0	0	0	0	0	0	0	0	0	0	0	0	0	0	0	0	0
10346	TRIM22	1	1	0	0.1	0	0	1	0	0	0	0	0	0	0	0	0	0	0	0	0	0	0	0	0	0	0
3609	ILF3	1	1	0	0.1	0	0	1	0	0	0	0	0	0	0	0	0	0	0	0	0	0	0	0	0	0	0
84889	SLC7A3	1	1	0	0.1	0	0	1	0	0	0	0	0	0	0	0	0	0	0	0	0	0	0	0	0	0	0
1730	DIAPH2	1	1	0	0.1	0	0	1	0	0	0	0	0	0	0	0	0	0	0	0	0	0	0	0	0	0	0
5331	PLCB3	1	1	0	0.1	0	0	1	0	0	0	0	0	0	0	0	0	0	0	0	0	0	0	0	0	0	0
9456	HOMER1	1	1	0	0.1	0	0	1	0	0	0	0	0	0	0	0	0	0	0	0	0	0	0	0	0	0	0
25788	RAD54B	1	1	0	0.1	0	0	1	0	0	0	0	0	0	0	0	0	0	0	0	0	0	0	0	0	0	0
26018	LRIG1	1	1	0	0.1	0	0	1	0	0	0	0	0	0	0	0	0	0	0	0	0	0	0	0	0	0	0
54882	ANKHD1	1	1	0	0.1	0	0	1	0	0	0	0	0	0	0	0	0	0	0	0	0	0	0	0	0	0	0
4277	MICB	1	1	0	0.1	0	0	1	0	0	0	0	0	0	0	0	0	0	0	0	0	0	0	0	0	0	0
55706	NDC1	1	1	0	0.1	0	0	1	0	0	0	0	0	0	0	0	0	0	0	0	0	0	0	0	0	0	0
54566	EPB41L4B	1	1	0	0.1	0	0	1	0	0	0	0	0	0	0	0	0	0	0	0	0	0	0	0	0	0	0
51491	NOP16	1	1	0	0.1	0	0	1	0	0	0	0	0	0	0	0	0	0	0	0	0	0	0	0	0	0	0
84549	MAK16	1	1	0	0.1	0	0	1	0	0	0	0	0	0	0	0	0	0	0	0	0	0	0	0	0	0	0
56915	EXOSC5	1	1	0	0.1	0	0	1	0	0	0	0	0	0	0	0	0	0	0	0	0	0	0	0	0	0	0
262	AMD1	1	1	0	0.1	0	0	1	0	0	0	0	0	0	0	0	0	0	0	0	0	0	0	0	0	0	0
10308	ZNF267	1	1	0	0.1	0	0	1	0	0	0	0	0	0	0	0	0	0	0	0	0	0	0	0	0	0	0
157627	LINC00599	1	1	0	0.1	0	0	1	0	0	0	0	0	0	0	0	0	0	0	0	0	0	0	0	0	0	0
54989	ZNF770	1	1	0	0.1	0	0	1	0	0	0	0	0	0	0	0	0	0	0	0	0	0	0	0	0	0	0
90990	KIFC2	1	1	0	0.1	0	0	1	0	0	0	0	0	0	0	0	0	0	0	0	0	0	0	0	0	0	0
3038	HAS3	1	1	0	0.1	0	0	1	0	0	0	0	0	0	0	0	0	0	0	0	0	0	0	0	0	0	0
80179	MYO19	1	1	0	0.1	0	0	1	0	0	0	0	0	0	0	0	0	0	0	0	0	0	0	0	0	0	0
51599	LSR	1	1	0	0.1	0	0	1	0	0	0	0	0	0	0	0	0	0	0	0	0	0	0	0	0	0	0
55749	CCAR1	1	1	0	0.1	0	0	1	0	0	0	0	0	0	0	0	0	0	0	0	0	0	0	0	0	0	0
84343	HPS3	1	1	0	0.1	0	0	1	0	0	0	0	0	0	0	0	0	0	0	0	0	0	0	0	0	0	0
64849	SLC13A3	1	1	0	0.1	0	0	1	0	0	0	0	0	0	0	0	0	0	0	0	0	0	0	0	0	0	0
81554	WBSCR16	1	1	0	0.1	0	0	1	0	0	0	0	0	0	0	0	0	0	0	0	0	0	0	0	0	0	0
55320	MIS18BP1	1	1	0	0.1	0	0	1	0	0	0	0	0	0	0	0	0	0	0	0	0	0	0	0	0	0	0
84296	GINS4	1	1	0	0.1	0	0	1	0	0	0	0	0	0	0	0	0	0	0	0	0	0	0	0	0	0	0
81542	TMX1	1	1	0	0.1	0	0	1	0	0	0	0	0	0	0	0	0	0	0	0	0	0	0	0	0	0	0
5771	PTPN2	1	1	0	0.1	0	0	1	0	0	0	0	0	0	0	0	0	0	0	0	0	0	0	0	0	0	0
2289	FKBP5	1	1	0	0.1	0	0	1	0	0	0	0	0	0	0	0	0	0	0	0	0	0	0	0	0	0	0
5163	PDK1	1	1	0	0.1	0	0	1	0	0	0	0	0	0	0	0	0	0	0	0	0	0	0	0	0	0	0
55975	KLHL7	1	1	0	0.1	0	0	1	0	0	0	0	0	0	0	0	0	0	0	0	0	0	0	0	0	0	0
23468	CBX5	1	1	0	0.1	0	0	1	0	0	0	0	0	0	0	0	0	0	0	0	0	0	0	0	0	0	0
3710	ITPR3	1	1	0	0.1	0	0	1	0	0	0	0	0	0	0	0	0	0	0	0	0	0	0	0	0	0	0
89	ACTN3	1	1	0	0.1	0	0	1	0	0	0	0	0	0	0	0	0	0	0	0	0	0	0	0	0	0	0
5932	RBBP8	1	1	0	0.1	0	0	1	0	0	0	0	0	0	0	0	0	0	0	0	0	0	0	0	0	0	0
55660	PRPF40A	1	1	0	0.1	0	0	1	0	0	0	0	0	0	0	0	0	0	0	0	0	0	0	0	0	0	0
4947	OAZ2	1	1	0	0.1	0	0	1	0	0	0	0	0	0	0	0	0	0	0	0	0	0	0	0	0	0	0
79023	NUP37	1	1	0	0.1	0	0	1	0	0	0	0	0	0	0	0	0	0	0	0	0	0	0	0	0	0	0
114569	MAL2	1	1	0	0.1	0	0	1	0	0	0	0	0	0	0	0	0	0	0	0	0	0	0	0	0	0	0
56548	CHST7	1	1	0	0.1	0	0	1	0	0	0	0	0	0	0	0	0	0	0	0	0	0	0	0	0	0	0
8745	ADAM23	1	1	0	0.1	0	0	1	0	0	0	0	0	0	0	0	0	0	0	0	0	0	0	0	0	0	0
5521	PPP2R2B	1	1	0	0.1	0	0	1	0	0	0	0	0	0	0	0	0	0	0	0	0	0	0	0	0	0	0
6059	ABCE1	1	1	0	0.1	0	0	1	0	0	0	0	0	0	0	0	0	0	0	0	0	0	0	0	0	0	0
2308	FOXO1	1	1	0	0.1	0	0	1	0	0	0	0	0	0	0	0	0	0	0	0	0	0	0	0	0	0	0
83596	BCL2L12	1	1	0	0.1	0	0	1	0	0	0	0	0	0	0	0	0	0	0	0	0	0	0	0	0	0	0
55010	PARPBP	1	1	0	0.1	0	0	1	0	0	0	0	0	0	0	0	0	0	0	0	0	0	0	0	0	0	0
57405	SPC25	1	1	0	0.1	0	0	1	0	0	0	0	0	0	0	0	0	0	0	0	0	0	0	0	0	0	0
6535	SLC6A8	1	1	0	0.1	0	0	1	0	0	0	0	0	0	0	0	0	0	0	0	0	0	0	0	0	0	0
51575	ESF1	1	1	0	0.1	0	0	1	0	0	0	0	0	0	0	0	0	0	0	0	0	0	0	0	0	0	0
81539	SLC38A1	1	1	0	0.1	0	0	1	0	0	0	0	0	0	0	0	0	0	0	0	0	0	0	0	0	0	0
80155	NAA15	1	1	0	0.1	0	0	1	0	0	0	0	0	0	0	0	0	0	0	0	0	0	0	0	0	0	0
8611	PPAP2A	1	1	0	0.1	0	0	1	0	0	0	0	0	0	0	0	0	0	0	0	0	0	0	0	0	0	0
79664	ICE2	1	1	0	0.1	0	0	1	0	0	0	0	0	0	0	0	0	0	0	0	0	0	0	0	0	0	0
3790	KCNS3	1	1	0	0.1	0	0	1	0	0	0	0	0	0	0	0	0	0	0	0	0	0	0	0	0	0	0
4240	MFGE8	1	1	0	0.1	0	0	1	0	0	0	0	0	0	0	0	0	0	0	0	0	0	0	0	0	0	0
9473	THEMIS2	1	1	0	0.1	0	0	1	0	0	0	0	0	0	0	0	0	0	0	0	0	0	0	0	0	0	0
64318	NOC3L	1	1	0	0.1	0	0	1	0	0	0	0	0	0	0	0	0	0	0	0	0	0	0	0	0	0	0
3964	LGALS8	1	1	0	0.1	0	0	1	0	0	0	0	0	0	0	0	0	0	0	0	0	0	0	0	0	0	0
11051	NUDT21	1	1	0	0.1	0	0	1	0	0	0	0	0	0	0	0	0	0	0	0	0	0	0	0	0	0	0
220042	DDIAS	1	1	0	0.1	0	0	1	0	0	0	0	0	0	0	0	0	0	0	0	0	0	0	0	0	0	0
51018	RRP15	1	1	0	0.1	0	0	1	0	0	0	0	0	0	0	0	0	0	0	0	0	0	0	0	0	0	0
80775	TMEM177	1	1	0	0.1	0	0	1	0	0	0	0	0	0	0	0	0	0	0	0	0	0	0	0	0	0	0
7019	TFAM	1	1	0	0.1	0	0	1	0	0	0	0	0	0	0	0	0	0	0	0	0	0	0	0	0	0	0
23170	TTLL12	1	1	0	0.1	0	0	1	0	0	0	0	0	0	0	0	0	0	0	0	0	0	0	0	0	0	0
23246	BOP1	1	1	0	0.1	0	0	1	0	0	0	0	0	0	0	0	0	0	0	0	0	0	0	0	0	0	0
29078	NDUFAF4	1	1	0	0.1	0	0	1	0	0	0	0	0	0	0	0	0	0	0	0	0	0	0	0	0	0	0
51659	GINS2	1	1	0	0.1	0	0	1	0	0	0	0	0	0	0	0	0	0	0	0	0	0	0	0	0	0	0
57408	LRTM1	1	1	0	0.1	0	0	1	0	0	0	0	0	0	0	0	0	0	0	0	0	0	0	0	0	0	0
3956	LGALS1	1	1	0	0.1	0	0	1	0	0	0	0	0	0	0	0	0	0	0	0	0	0	0	0	0	0	0
100506013	APELA	1	1	0	0.1	0	0	1	0	0	0	0	0	0	0	0	0	0	0	0	0	0	0	0	0	0	0
6652	SORD	1	1	0	0.1	0	0	1	0	0	0	0	0	0	0	0	0	0	0	0	0	0	0	0	0	0	0
55799	CACNA2D3	1	1	0	0.1	0	0	1	0	0	0	0	0	0	0	0	0	0	0	0	0	0	0	0	0	0	0
1469	CST1	1	1	0	0.1	0	0	1	0	0	0	0	0	0	0	0	0	0	0	0	0	0	0	0	0	0	0
5822	PWP2	1	1	0	0.1	0	0	1	0	0	0	0	0	0	0	0	0	0	0	0	0	0	0	0	0	0	0
7919	DDX39B	1	1	0	0.1	0	0	1	0	0	0	0	0	0	0	0	0	0	0	0	0	0	0	0	0	0	0
118672	PSTK	1	1	0	0.1	0	0	1	0	0	0	0	0	0	0	0	0	0	0	0	0	0	0	0	0	0	0
25836	NIPBL	1	1	0	0.1	0	0	1	0	0	0	0	0	0	0	0	0	0	0	0	0	0	0	0	0	0	0
29883	CNOT7	1	1	0	0.1	0	0	1	0	0	0	0	0	0	0	0	0	0	0	0	0	0	0	0	0	0	0
64105	CENPK	1	1	0	0.1	0	0	1	0	0	0	0	0	0	0	0	0	0	0	0	0	0	0	0	0	0	0
4312	MMP1	1	1	0	0.1	0	0	1	0	0	0	0	0	0	0	0	0	0	0	0	0	0	0	0	0	0	0
9117	SEC22C	1	1	0	0.1	0	0	1	0	0	0	0	0	0	0	0	0	0	0	0	0	0	0	0	0	0	0
56886	UGGT1	1	1	0	0.1	0	0	1	0	0	0	0	0	0	0	0	0	0	0	0	0	0	0	0	0	0	0
79657	RPAP3	1	1	0	0.1	0	0	1	0	0	0	0	0	0	0	0	0	0	0	0	0	0	0	0	0	0	0
706	TSPO	1	1	0	0.1	0	0	1	0	0	0	0	0	0	0	0	0	0	0	0	0	0	0	0	0	0	0
93010	B3GNT7	1	1	0	0.1	0	0	1	0	0	0	0	0	0	0	0	0	0	0	0	0	0	0	0	0	0	0
5501	PPP1CC	1	1	0	0.1	0	0	1	0	0	0	0	0	0	0	0	0	0	0	0	0	0	0	0	0	0	0
2925	GRPR	1	1	0	0.1	0	0	1	0	0	0	0	0	0	0	0	0	0	0	0	0	0	0	0	0	0	0
55131	RBM28	1	1	0	0.1	0	0	1	0	0	0	0	0	0	0	0	0	0	0	0	0	0	0	0	0	0	0
64854	USP46	1	1	0	0.1	0	0	1	0	0	0	0	0	0	0	0	0	0	0	0	0	0	0	0	0	0	0
64377	CHST8	1	1	0	0.1	0	0	1	0	0	0	0	0	0	0	0	0	0	0	0	0	0	0	0	0	0	0
57508	INTS2	1	1	0	0.1	0	0	1	0	0	0	0	0	0	0	0	0	0	0	0	0	0	0	0	0	0	0
2189	FANCG	1	1	0	0.1	0	0	1	0	0	0	0	0	0	0	0	0	0	0	0	0	0	0	0	0	0	0
25945	PVRL3	1	1	0	0.1	0	0	1	0	0	0	0	0	0	0	0	0	0	0	0	0	0	0	0	0	0	0
26973	CHORDC1	1	1	0	0.1	0	0	1	0	0	0	0	0	0	0	0	0	0	0	0	0	0	0	0	0	0	0
673	BRAF	1	1	0	0.1	0	0	1	0	0	0	0	0	0	0	0	0	0	0	0	0	0	0	0	0	0	0
64409	WBSCR17	1	1	0	0.1	0	0	1	0	0	0	0	0	0	0	0	0	0	0	0	0	0	0	0	0	0	0
58498	MYL7	1	1	0	0.1	0	0	1	0	0	0	0	0	0	0	0	0	0	0	0	0	0	0	0	0	0	0
3655	ITGA6	1	1	0	0.1	0	0	1	0	0	0	0	0	0	0	0	0	0	0	0	0	0	0	0	0	0	0
10724	MGEA5	1	1	0	0.1	0	0	1	0	0	0	0	0	0	0	0	0	0	0	0	0	0	0	0	0	0	0
1964	EIF1AX	1	1	0	0.1	0	0	1	0	0	0	0	0	0	0	0	0	0	0	0	0	0	0	0	0	0	0
108	ADCY2	1	1	0	0.1	0	0	1	0	0	0	0	0	0	0	0	0	0	0	0	0	0	0	0	0	0	0
29118	DDX25	1	1	0	0.1	0	0	1	0	0	0	0	0	0	0	0	0	0	0	0	0	0	0	0	0	0	0
55720	TSR1	1	1	0	0.1	0	0	1	0	0	0	0	0	0	0	0	0	0	0	0	0	0	0	0	0	0	0
26996	GPR160	1	1	0	0.1	0	0	1	0	0	0	0	0	0	0	0	0	0	0	0	0	0	0	0	0	0	0
54941	RNF125	1	1	0	0.1	0	0	1	0	0	0	0	0	0	0	0	0	0	0	0	0	0	0	0	0	0	0
3291	HSD11B2	1	1	0	0.1	0	0	1	0	0	0	0	0	0	0	0	0	0	0	0	0	0	0	0	0	0	0
5451	POU2F1	1	1	0	0.1	0	0	1	0	0	0	0	0	0	0	0	0	0	0	0	0	0	0	0	0	0	0
23302	WSCD1	1	1	0	0.1	0	0	1	0	0	0	0	0	0	0	0	0	0	0	0	0	0	0	0	0	0	0
3646	EIF3E	1	1	0	0.1	0	0	1	0	0	0	0	0	0	0	0	0	0	0	0	0	0	0	0	0	0	0
80178	C16orf59	1	1	0	0.1	0	0	1	0	0	0	0	0	0	0	0	0	0	0	0	0	0	0	0	0	0	0
84669	USP32	1	1	0	0.1	0	0	1	0	0	0	0	0	0	0	0	0	0	0	0	0	0	0	0	0	0	0
29108	PYCARD	1	1	0	0.1	0	0	1	0	0	0	0	0	0	0	0	0	0	0	0	0	0	0	0	0	0	0
133	ADM	1	1	0	0.1	0	0	1	0	0	0	0	0	0	0	0	0	0	0	0	0	0	0	0	0	0	0
27164	SALL3	1	1	0	0.1	0	0	1	0	0	0	0	0	0	0	0	0	0	0	0	0	0	0	0	0	0	0
55119	PRPF38B	1	1	0	0.1	0	0	1	0	0	0	0	0	0	0	0	0	0	0	0	0	0	0	0	0	0	0
22976	PAXIP1	1	1	0	0.1	0	0	1	0	0	0	0	0	0	0	0	0	0	0	0	0	0	0	0	0	0	0
8645	KCNK5	1	1	0	0.1	0	0	1	0	0	0	0	0	0	0	0	0	0	0	0	0	0	0	0	0	0	0
887	CCKBR	1	1	0	0.1	0	0	1	0	0	0	0	0	0	0	0	0	0	0	0	0	0	0	0	0	0	0
5422	POLA1	1	1	0	0.1	0	0	1	0	0	0	0	0	0	0	0	0	0	0	0	0	0	0	0	0	0	0
7184	HSP90B1	1	1	0	0.1	0	0	1	0	0	0	0	0	0	0	0	0	0	0	0	0	0	0	0	0	0	0
5625	PRODH	1	1	0	0.1	0	0	1	0	0	0	0	0	0	0	0	0	0	0	0	0	0	0	0	0	0	0
57646	USP28	1	1	0	0.1	0	0	1	0	0	0	0	0	0	0	0	0	0	0	0	0	0	0	0	0	0	0
57673	BEND3	1	1	0	0.1	0	0	1	0	0	0	0	0	0	0	0	0	0	0	0	0	0	0	0	0	0	0
197407	ZNF48	1	1	0	0.1	0	0	1	0	0	0	0	0	0	0	0	0	0	0	0	0	0	0	0	0	0	0
55536	CDCA7L	1	1	0	0.1	0	0	1	0	0	0	0	0	0	0	0	0	0	0	0	0	0	0	0	0	0	0
2786	GNG4	1	1	0	0.1	0	0	1	0	0	0	0	0	0	0	0	0	0	0	0	0	0	0	0	0	0	0
114883	OSBPL9	1	1	0	0.1	0	0	1	0	0	0	0	0	0	0	0	0	0	0	0	0	0	0	0	0	0	0
81931	ZNF93	1	1	0	0.1	0	0	1	0	0	0	0	0	0	0	0	0	0	0	0	0	0	0	0	0	0	0
9949	AMMECR1	1	1	0	0.1	0	0	1	0	0	0	0	0	0	0	0	0	0	0	0	0	0	0	0	0	0	0
51087	YBX2	1	1	0	0.1	0	0	1	0	0	0	0	0	0	0	0	0	0	0	0	0	0	0	0	0	0	0
8539	API5	1	1	0	0.1	0	0	1	0	0	0	0	0	0	0	0	0	0	0	0	0	0	0	0	0	0	0
23404	EXOSC2	1	1	0	0.1	0	0	1	0	0	0	0	0	0	0	0	0	0	0	0	0	0	0	0	0	0	0
23075	SWAP70	1	1	0	0.1	0	0	1	0	0	0	0	0	0	0	0	0	0	0	0	0	0	0	0	0	0	0
23595	ORC3	1	1	0	0.1	0	0	1	0	0	0	0	0	0	0	0	0	0	0	0	0	0	0	0	0	0	0
84986	ARHGAP19	1	1	0	0.1	0	0	1	0	0	0	0	0	0	0	0	0	0	0	0	0	0	0	0	0	0	0
2888	GRB14	1	1	0	0.1	0	0	1	0	0	0	0	0	0	0	0	0	0	0	0	0	0	0	0	0	0	0
79677	SMC6	1	1	0	0.1	0	0	1	0	0	0	0	0	0	0	0	0	0	0	0	0	0	0	0	0	0	0
55326	AGPAT5	1	1	0	0.1	0	0	1	0	0	0	0	0	0	0	0	0	0	0	0	0	0	0	0	0	0	0
58527	ABRACL	1	1	0	0.1	0	0	1	0	0	0	0	0	0	0	0	0	0	0	0	0	0	0	0	0	0	0
8467	SMARCA5	1	1	0	0.1	0	0	1	0	0	0	0	0	0	0	0	0	0	0	0	0	0	0	0	0	0	0
55075	UACA	1	1	0	0.1	0	0	1	0	0	0	0	0	0	0	0	0	0	0	0	0	0	0	0	0	0	0
84930	MASTL	1	1	0	0.1	0	0	1	0	0	0	0	0	0	0	0	0	0	0	0	0	0	0	0	0	0	0
56963	RGMA	1	1	0	0.1	0	0	1	0	0	0	0	0	0	0	0	0	0	0	0	0	0	0	0	0	0	0
23279	NUP160	1	1	0	0.1	0	0	1	0	0	0	0	0	0	0	0	0	0	0	0	0	0	0	0	0	0	0
7750	ZMYM2	1	1	0	0.1	0	0	1	0	0	0	0	0	0	0	0	0	0	0	0	0	0	0	0	0	0	0
79570	NKAIN1	1	1	0	0.1	0	0	1	0	0	0	0	0	0	0	0	0	0	0	0	0	0	0	0	0	0	0
7086	TKT	1	1	0	0.1	0	0	1	0	0	0	0	0	0	0	0	0	0	0	0	0	0	0	0	0	0	0
122060	SLAIN1	1	1	0	0.1	0	0	1	0	0	0	0	0	0	0	0	0	0	0	0	0	0	0	0	0	0	0
23607	CD2AP	1	1	0	0.1	0	0	1	0	0	0	0	0	0	0	0	0	0	0	0	0	0	0	0	0	0	0
10135	NAMPT	1	1	0	0.1	0	0	1	0	0	0	0	0	0	0	0	0	0	0	0	0	0	0	0	0	0	0
23321	TRIM2	1	1	0	0.1	0	0	1	0	0	0	0	0	0	0	0	0	0	0	0	0	0	0	0	0	0	0
93664	CADPS2	1	1	0	0.1	0	0	1	0	0	0	0	0	0	0	0	0	0	0	0	0	0	0	0	0	0	0
55055	ZWILCH	1	1	0	0.1	0	0	1	0	0	0	0	0	0	0	0	0	0	0	0	0	0	0	0	0	0	0
96764	TGS1	1	1	0	0.1	0	0	1	0	0	0	0	0	0	0	0	0	0	0	0	0	0	0	0	0	0	0
79918	SETD6	1	1	0	0.1	0	0	1	0	0	0	0	0	0	0	0	0	0	0	0	0	0	0	0	0	0	0
27340	UTP20	1	1	0	0.1	0	0	1	0	0	0	0	0	0	0	0	0	0	0	0	0	0	0	0	0	0	0
26278	SACS	1	1	0	0.1	0	0	1	0	0	0	0	0	0	0	0	0	0	0	0	0	0	0	0	0	0	0
6510	SLC1A5	1	1	0	0.1	0	0	1	0	0	0	0	0	0	0	0	0	0	0	0	0	0	0	0	0	0	0
28977	MRPL42	1	1	0	0.1	0	0	1	0	0	0	0	0	0	0	0	0	0	0	0	0	0	0	0	0	0	0
8883	NAE1	1	1	0	0.1	0	0	1	0	0	0	0	0	0	0	0	0	0	0	0	0	0	0	0	0	0	0
25879	DCAF13	1	1	0	0.1	0	0	1	0	0	0	0	0	0	0	0	0	0	0	0	0	0	0	0	0	0	0
129401	NUP35	1	1	0	0.1	0	0	1	0	0	0	0	0	0	0	0	0	0	0	0	0	0	0	0	0	0	0
2774	GNAL	1	1	0	0.1	0	0	1	0	0	0	0	0	0	0	0	0	0	0	0	0	0	0	0	0	0	0
1112	FOXN3	1	1	0	0.1	0	0	1	0	0	0	0	0	0	0	0	0	0	0	0	0	0	0	0	0	0	0
65260	COA7	1	1	0	0.1	0	0	1	0	0	0	0	0	0	0	0	0	0	0	0	0	0	0	0	0	0	0
84128	WDR75	1	1	0	0.1	0	0	1	0	0	0	0	0	0	0	0	0	0	0	0	0	0	0	0	0	0	0
8165	AKAP1	1	1	0	0.1	0	0	1	0	0	0	0	0	0	0	0	0	0	0	0	0	0	0	0	0	0	0
79832	QSER1	1	1	0	0.1	0	0	1	0	0	0	0	0	0	0	0	0	0	0	0	0	0	0	0	0	0	0
53371	NUP54	1	1	0	0.1	0	0	1	0	0	0	0	0	0	0	0	0	0	0	0	0	0	0	0	0	0	0
100506658	OCLN	1	1	0	0.1	0	0	1	0	0	0	0	0	0	0	0	0	0	0	0	0	0	0	0	0	0	0
7705	ZNF146	1	1	0	0.1	0	0	1	0	0	0	0	0	0	0	0	0	0	0	0	0	0	0	0	0	0	0
10052	GJC1	1	1	0	0.1	0	0	1	0	0	0	0	0	0	0	0	0	0	0	0	0	0	0	0	0	0	0
9948	WDR1	1	1	0	0.1	0	0	1	0	0	0	0	0	0	0	0	0	0	0	0	0	0	0	0	0	0	0
8028	MLLT10	1	1	0	0.1	0	0	1	0	0	0	0	0	0	0	0	0	0	0	0	0	0	0	0	0	0	0
1337	COX6A1	1	1	0	0.1	0	0	1	0	0	0	0	0	0	0	0	0	0	0	0	0	0	0	0	0	0	0
9782	MATR3	1	1	0	0.1	0	0	1	0	0	0	0	0	0	0	0	0	0	0	0	0	0	0	0	0	0	0
7037	TFRC	1	1	0	0.1	0	0	1	0	0	0	0	0	0	0	0	0	0	0	0	0	0	0	0	0	0	0
26168	SENP3	1	1	0	0.1	0	0	1	0	0	0	0	0	0	0	0	0	0	0	0	0	0	0	0	0	0	0
55571	CNOT11	1	1	0	0.1	0	0	1	0	0	0	0	0	0	0	0	0	0	0	0	0	0	0	0	0	0	0
22901	ARSG	1	1	0	0.1	0	0	1	0	0	0	0	0	0	0	0	0	0	0	0	0	0	0	0	0	0	0
3612	IMPA1	1	1	0	0.1	0	0	1	0	0	0	0	0	0	0	0	0	0	0	0	0	0	0	0	0	0	0
160760	PPTC7	1	1	0	0.1	0	0	1	0	0	0	0	0	0	0	0	0	0	0	0	0	0	0	0	0	0	0
55291	PPP6R3	1	1	0	0.1	0	0	1	0	0	0	0	0	0	0	0	0	0	0	0	0	0	0	0	0	0	0
3177	SLC29A2	1	1	0	0.1	0	0	1	0	0	0	0	0	0	0	0	0	0	0	0	0	0	0	0	0	0	0
90390	MED30	1	1	0	0.1	0	0	1	0	0	0	0	0	0	0	0	0	0	0	0	0	0	0	0	0	0	0
687	KLF9	1	1	0	0.1	0	0	1	0	0	0	0	0	0	0	0	0	0	0	0	0	0	0	0	0	0	0
196475	RMST	1	1	0	0.1	0	0	1	0	0	0	0	0	0	0	0	0	0	0	0	0	0	0	0	0	0	0
80817	CEP44	1	1	0	0.1	0	0	1	0	0	0	0	0	0	0	0	0	0	0	0	0	0	0	0	0	0	0
79187	FSD1	1	1	0	0.1	0	0	1	0	0	0	0	0	0	0	0	0	0	0	0	0	0	0	0	0	0	0
54930	HAUS4	1	1	0	0.1	0	0	1	0	0	0	0	0	0	0	0	0	0	0	0	0	0	0	0	0	0	0
729533	FAM72A	1	1	0	0.1	0	0	1	0	0	0	0	0	0	0	0	0	0	0	0	0	0	0	0	0	0	0
11101	ATE1	1	1	0	0.1	0	0	1	0	0	0	0	0	0	0	0	0	0	0	0	0	0	0	0	0	0	0
200895	DHFRL1	1	1	0	0.1	0	0	1	0	0	0	0	0	0	0	0	0	0	0	0	0	0	0	0	0	0	0
5563	PRKAA2	1	1	0	0.1	0	0	1	0	0	0	0	0	0	0	0	0	0	0	0	0	0	0	0	0	0	0
5793	PTPRG	1	1	0	0.1	0	0	1	0	0	0	0	0	0	0	0	0	0	0	0	0	0	0	0	0	0	0
65982	ZSCAN18	1	1	0	0.1	0	0	1	0	0	0	0	0	0	0	0	0	0	0	0	0	0	0	0	0	0	0
9848	MFAP3L	1	1	0	0.1	0	0	1	0	0	0	0	0	0	0	0	0	0	0	0	0	0	0	0	0	0	0
11103	KRR1	1	1	0	0.1	0	0	1	0	0	0	0	0	0	0	0	0	0	0	0	0	0	0	0	0	0	0
81493	SYNC	1	1	0	0.1	0	0	1	0	0	0	0	0	0	0	0	0	0	0	0	0	0	0	0	0	0	0
4927	NUP88	1	1	0	0.1	0	0	1	0	0	0	0	0	0	0	0	0	0	0	0	0	0	0	0	0	0	0
57216	VANGL2	1	1	0	0.1	0	0	1	0	0	0	0	0	0	0	0	0	0	0	0	0	0	0	0	0	0	0
138255	C9orf135	1	1	0	0.1	0	0	1	0	0	0	0	0	0	0	0	0	0	0	0	0	0	0	0	0	0	0
3978	LIG1	1	1	0	0.1	0	0	1	0	0	0	0	0	0	0	0	0	0	0	0	0	0	0	0	0	0	0
9039	UBA3	1	1	0	0.1	0	0	1	0	0	0	0	0	0	0	0	0	0	0	0	0	0	0	0	0	0	0
27332	ZNF638	1	1	0	0.1	0	0	1	0	0	0	0	0	0	0	0	0	0	0	0	0	0	0	0	0	0	0
9849	ZNF518A	1	1	0	0.1	0	0	1	0	0	0	0	0	0	0	0	0	0	0	0	0	0	0	0	0	0	0
1915	EEF1A1	1	1	0	0.1	0	0	1	0	0	0	0	0	0	0	0	0	0	0	0	0	0	0	0	0	0	0
1954	MEGF8	1	1	0	0.1	0	0	1	0	0	0	0	0	0	0	0	0	0	0	0	0	0	0	0	0	0	0
6136	RPL12	1	1	0	0.1	0	0	1	0	0	0	0	0	0	0	0	0	0	0	0	0	0	0	0	0	0	0
10885	WDR3	1	1	0	0.1	0	0	1	0	0	0	0	0	0	0	0	0	0	0	0	0	0	0	0	0	0	0
50804	MYEF2	1	1	0	0.1	0	0	1	0	0	0	0	0	0	0	0	0	0	0	0	0	0	0	0	0	0	0
55809	TRERF1	1	1	0	0.1	0	0	1	0	0	0	0	0	0	0	0	0	0	0	0	0	0	0	0	0	0	0
7163	TPD52	1	1	0	0.1	0	0	1	0	0	0	0	0	0	0	0	0	0	0	0	0	0	0	0	0	0	0
56896	DPYSL5	1	1	0	0.1	0	0	1	0	0	0	0	0	0	0	0	0	0	0	0	0	0	0	0	0	0	0
63979	FIGNL1	1	1	0	0.1	0	0	1	0	0	0	0	0	0	0	0	0	0	0	0	0	0	0	0	0	0	0
9984	THOC1	1	1	0	0.1	0	0	1	0	0	0	0	0	0	0	0	0	0	0	0	0	0	0	0	0	0	0
5203	PFDN4	1	1	0	0.1	0	0	1	0	0	0	0	0	0	0	0	0	0	0	0	0	0	0	0	0	0	0
144097	C11orf84	1	1	0	0.1	0	0	1	0	0	0	0	0	0	0	0	0	0	0	0	0	0	0	0	0	0	0
55787	TXLNG	1	1	0	0.1	0	0	1	0	0	0	0	0	0	0	0	0	0	0	0	0	0	0	0	0	0	0
51441	YTHDF2	1	1	0	0.1	0	0	1	0	0	0	0	0	0	0	0	0	0	0	0	0	0	0	0	0	0	0
10664	CTCF	1	1	0	0.1	0	0	1	0	0	0	0	0	0	0	0	0	0	0	0	0	0	0	0	0	0	0
51501	C11orf73	1	1	0	0.1	0	0	1	0	0	0	0	0	0	0	0	0	0	0	0	0	0	0	0	0	0	0
5152	PDE9A	1	1	0	0.1	0	0	1	0	0	0	0	0	0	0	0	0	0	0	0	0	0	0	0	0	0	0
8667	EIF3H	1	1	0	0.1	0	0	1	0	0	0	0	0	0	0	0	0	0	0	0	0	0	0	0	0	0	0
23347	SMCHD1	1	1	0	0.1	0	0	1	0	0	0	0	0	0	0	0	0	0	0	0	0	0	0	0	0	0	0
10483	SEC23B	1	1	0	0.1	0	0	1	0	0	0	0	0	0	0	0	0	0	0	0	0	0	0	0	0	0	0
91862	MARVELD3	1	1	0	0.1	0	0	1	0	0	0	0	0	0	0	0	0	0	0	0	0	0	0	0	0	0	0
222255	ATXN7L1	1	1	0	0.1	0	0	1	0	0	0	0	0	0	0	0	0	0	0	0	0	0	0	0	0	0	0
8208	CHAF1B	1	1	0	0.1	0	0	1	0	0	0	0	0	0	0	0	0	0	0	0	0	0	0	0	0	0	0
10164	CHST4	1	1	0	0.1	0	0	1	0	0	0	0	0	0	0	0	0	0	0	0	0	0	0	0	0	0	0
79852	EPHX3	1	1	0	0.1	0	0	1	0	0	0	0	0	0	0	0	0	0	0	0	0	0	0	0	0	0	0
4857	NOVA1	1	1	0	0.1	0	0	1	0	0	0	0	0	0	0	0	0	0	0	0	0	0	0	0	0	0	0
64965	MRPS9	1	1	0	0.1	0	0	1	0	0	0	0	0	0	0	0	0	0	0	0	0	0	0	0	0	0	0
64386	MMP25	1	1	0	0.1	0	0	1	0	0	0	0	0	0	0	0	0	0	0	0	0	0	0	0	0	0	0
11184	MAP4K1	1	1	0	0.1	0	0	1	0	0	0	0	0	0	0	0	0	0	0	0	0	0	0	0	0	0	0
54906	FAM208B	1	1	0	0.1	0	0	1	0	0	0	0	0	0	0	0	0	0	0	0	0	0	0	0	0	0	0
10054	UBA2	1	1	0	0.1	0	0	1	0	0	0	0	0	0	0	0	0	0	0	0	0	0	0	0	0	0	0
4682	NUBP1	1	1	0	0.1	0	0	1	0	0	0	0	0	0	0	0	0	0	0	0	0	0	0	0	0	0	0
80025	PANK2	1	1	0	0.1	0	0	1	0	0	0	0	0	0	0	0	0	0	0	0	0	0	0	0	0	0	0
79902	NUP85	1	1	0	0.1	0	0	1	0	0	0	0	0	0	0	0	0	0	0	0	0	0	0	0	0	0	0
27165	GLS2	1	1	0	0.1	0	0	1	0	0	0	0	0	0	0	0	0	0	0	0	0	0	0	0	0	0	0
51616	TAF9B	1	1	0	0.1	0	0	1	0	0	0	0	0	0	0	0	0	0	0	0	0	0	0	0	0	0	0
5979	RET	1	1	0	0.1	0	0	1	0	0	0	0	0	0	0	0	0	0	0	0	0	0	0	0	0	0	0
79698	ZMAT4	1	1	0	0.1	0	0	1	0	0	0	0	0	0	0	0	0	0	0	0	0	0	0	0	0	0	0
27143	PALD1	1	1	0	0.1	0	0	1	0	0	0	0	0	0	0	0	0	0	0	0	0	0	0	0	0	0	0
9425	CDYL	1	1	0	0.1	0	0	1	0	0	0	0	0	0	0	0	0	0	0	0	0	0	0	0	0	0	0
27287	VENTX	1	1	0	0.1	0	0	1	0	0	0	0	0	0	0	0	0	0	0	0	0	0	0	0	0	0	0
9793	CKAP5	1	1	0	0.1	0	0	1	0	0	0	0	0	0	0	0	0	0	0	0	0	0	0	0	0	0	0
51191	HERC5	1	1	0	0.1	0	0	1	0	0	0	0	0	0	0	0	0	0	0	0	0	0	0	0	0	0	0
9715	FAM131B	1	1	0	0.1	0	0	1	0	0	0	0	0	0	0	0	0	0	0	0	0	0	0	0	0	0	0
1113	CHGA	1	1	0	0.1	0	0	1	0	0	0	0	0	0	0	0	0	0	0	0	0	0	0	0	0	0	0
80014	WWC2	1	1	0	0.1	0	0	1	0	0	0	0	0	0	0	0	0	0	0	0	0	0	0	0	0	0	0
6875	TAF4B	1	1	0	0.1	0	0	1	0	0	0	0	0	0	0	0	0	0	0	0	0	0	0	0	0	0	0
6641	SNTB1	1	1	0	0.1	0	0	1	0	0	0	0	0	0	0	0	0	0	0	0	0	0	0	0	0	0	0
11198	SUPT16H	1	1	0	0.1	0	0	1	0	0	0	0	0	0	0	0	0	0	0	0	0	0	0	0	0	0	0
116832	RPL39L	1	1	0	0.1	0	0	1	0	0	0	0	0	0	0	0	0	0	0	0	0	0	0	0	0	0	0
9830	TRIM14	1	1	0	0.1	0	0	1	0	0	0	0	0	0	0	0	0	0	0	0	0	0	0	0	0	0	0
54437	SEMA5B	1	1	0	0.1	0	0	1	0	0	0	0	0	0	0	0	0	0	0	0	0	0	0	0	0	0	0
11164	NUDT5	1	1	0	0.1	0	0	1	0	0	0	0	0	0	0	0	0	0	0	0	0	0	0	0	0	0	0
25932	CLIC4	1	1	0	0.1	0	0	1	0	0	0	0	0	0	0	0	0	0	0	0	0	0	0	0	0	0	0
79774	GRTP1	1	1	0	0.1	0	0	1	0	0	0	0	0	0	0	0	0	0	0	0	0	0	0	0	0	0	0
23589	CARHSP1	1	1	0	0.1	0	0	1	0	0	0	0	0	0	0	0	0	0	0	0	0	0	0	0	0	0	0
8662	EIF3B	1	1	0	0.1	0	0	1	0	0	0	0	0	0	0	0	0	0	0	0	0	0	0	0	0	0	0
3151	HMGN2	1	1	0	0.1	0	0	1	0	0	0	0	0	0	0	0	0	0	0	0	0	0	0	0	0	0	0
140706	CCM2L	1	1	0	0.1	0	0	1	0	0	0	0	0	0	0	0	0	0	0	0	0	0	0	0	0	0	0
10056	FARSB	1	1	0	0.1	0	0	1	0	0	0	0	0	0	0	0	0	0	0	0	0	0	0	0	0	0	0
149175	MANEAL	1	1	0	0.1	0	0	1	0	0	0	0	0	0	0	0	0	0	0	0	0	0	0	0	0	0	0
64168	NECAB1	1	1	0	0.1	0	0	1	0	0	0	0	0	0	0	0	0	0	0	0	0	0	0	0	0	0	0
9295	SRSF11	1	1	0	0.1	0	0	1	0	0	0	0	0	0	0	0	0	0	0	0	0	0	0	0	0	0	0
83959	SLC4A11	1	1	0	0.1	0	0	1	0	0	0	0	0	0	0	0	0	0	0	0	0	0	0	0	0	0	0
5148	PDE6G	1	1	0	0.1	0	0	1	0	0	0	0	0	0	0	0	0	0	0	0	0	0	0	0	0	0	0
65008	MRPL1	1	1	0	0.1	0	0	1	0	0	0	0	0	0	0	0	0	0	0	0	0	0	0	0	0	0	0
55023	PHIP	1	1	0	0.1	0	0	1	0	0	0	0	0	0	0	0	0	0	0	0	0	0	0	0	0	0	0
6742	SSBP1	1	1	0	0.1	0	0	1	0	0	0	0	0	0	0	0	0	0	0	0	0	0	0	0	0	0	0
23394	ADNP	1	1	0	0.1	0	0	1	0	0	0	0	0	0	0	0	0	0	0	0	0	0	0	0	0	0	0
55711	FAR2	1	1	0	0.1	0	0	1	0	0	0	0	0	0	0	0	0	0	0	0	0	0	0	0	0	0	0
770	CA11	1	1	0	0.1	0	0	1	0	0	0	0	0	0	0	0	0	0	0	0	0	0	0	0	0	0	0
137970	UNC5D	1	1	0	0.1	0	0	1	0	0	0	0	0	0	0	0	0	0	0	0	0	0	0	0	0	0	0
80144	FRAS1	1	1	0	0.1	0	0	1	0	0	0	0	0	0	0	0	0	0	0	0	0	0	0	0	0	0	0
10278	EFS	1	1	0	0.1	0	0	1	0	0	0	0	0	0	0	0	0	0	0	0	0	0	0	0	0	0	0
16	AARS	1	1	0	0.1	0	0	1	0	0	0	0	0	0	0	0	0	0	0	0	0	0	0	0	0	0	0
377	ARF3	1	1	0	0.1	0	0	1	0	0	0	0	0	0	0	0	0	0	0	0	0	0	0	0	0	0	0
22829	NLGN4Y	1	1	0	0.1	0	0	1	0	0	0	0	0	0	0	0	0	0	0	0	0	0	0	0	0	0	0
170960	ZNF721	1	1	0	0.1	0	0	1	0	0	0	0	0	0	0	0	0	0	0	0	0	0	0	0	0	0	0
55422	ZNF331	1	1	0	0.1	0	0	1	0	0	0	0	0	0	0	0	0	0	0	0	0	0	0	0	0	0	0
9669	EIF5B	1	1	0	0.1	0	0	1	0	0	0	0	0	0	0	0	0	0	0	0	0	0	0	0	0	0	0
23165	NUP205	1	1	0	0.1	0	0	1	0	0	0	0	0	0	0	0	0	0	0	0	0	0	0	0	0	0	0
3842	TNPO1	1	1	0	0.1	0	0	1	0	0	0	0	0	0	0	0	0	0	0	0	0	0	0	0	0	0	0
6658	SOX3	1	1	0	0.1	0	0	1	0	0	0	0	0	0	0	0	0	0	0	0	0	0	0	0	0	0	0
3352	HTR1D	1	1	0	0.1	0	0	1	0	0	0	0	0	0	0	0	0	0	0	0	0	0	0	0	0	0	0
10728	PTGES3	1	1	0	0.1	0	0	1	0	0	0	0	0	0	0	0	0	0	0	0	0	0	0	0	0	0	0
3014	H2AFX	1	1	0	0.1	0	0	1	0	0	0	0	0	0	0	0	0	0	0	0	0	0	0	0	0	0	0
5236	PGM1	1	1	0	0.1	0	0	1	0	0	0	0	0	0	0	0	0	0	0	0	0	0	0	0	0	0	0
25819	CCRN4L	1	1	0	0.1	0	0	1	0	0	0	0	0	0	0	0	0	0	0	0	0	0	0	0	0	0	0
55521	TRIM36	1	1	0	0.1	0	0	1	0	0	0	0	0	0	0	0	0	0	0	0	0	0	0	0	0	0	0
10437	IFI30	1	1	0	0.1	0	0	1	0	0	0	0	0	0	0	0	0	0	0	0	0	0	0	0	0	0	0
686	BTD	1	1	0	0.1	0	0	1	0	0	0	0	0	0	0	0	0	0	0	0	0	0	0	0	0	0	0
178	AGL	1	1	0	0.1	0	0	1	0	0	0	0	0	0	0	0	0	0	0	0	0	0	0	0	0	0	0
3693	ITGB5	1	1	0	0.1	0	0	1	0	0	0	0	0	0	0	0	0	0	0	0	0	0	0	0	0	0	0
254887	ZDHHC23	1	1	0	0.1	0	0	1	0	0	0	0	0	0	0	0	0	0	0	0	0	0	0	0	0	0	0
5591	PRKDC	1	1	0	0.1	0	0	1	0	0	0	0	0	0	0	0	0	0	0	0	0	0	0	0	0	0	0
54756	IL17RD	1	1	0	0.1	0	0	1	0	0	0	0	0	0	0	0	0	0	0	0	0	0	0	0	0	0	0
5965	RECQL	1	1	0	0.1	0	0	1	0	0	0	0	0	0	0	0	0	0	0	0	0	0	0	0	0	0	0
50487	PLA2G3	1	1	0	0.1	0	0	1	0	0	0	0	0	0	0	0	0	0	0	0	0	0	0	0	0	0	0
9584	RBM39	1	1	0	0.1	0	0	1	0	0	0	0	0	0	0	0	0	0	0	0	0	0	0	0	0	0	0
84617	TUBB6	1	1	0	0.1	0	0	1	0	0	0	0	0	0	0	0	0	0	0	0	0	0	0	0	0	0	0
6491	STIL	1	1	0	0.1	0	0	1	0	0	0	0	0	0	0	0	0	0	0	0	0	0	0	0	0	0	0
5579	PRKCB	1	1	0	0.1	0	0	1	0	0	0	0	0	0	0	0	0	0	0	0	0	0	0	0	0	0	0
23173	METAP1	1	1	0	0.1	0	0	1	0	0	0	0	0	0	0	0	0	0	0	0	0	0	0	0	0	0	0
23076	RRP1B	1	1	0	0.1	0	0	1	0	0	0	0	0	0	0	0	0	0	0	0	0	0	0	0	0	0	0
79842	ZBTB3	1	1	0	0.1	0	0	1	0	0	0	0	0	0	0	0	0	0	0	0	0	0	0	0	0	0	0
3145	HMBS	1	1	0	0.1	0	0	1	0	0	0	0	0	0	0	0	0	0	0	0	0	0	0	0	0	0	0
112885	PHF21B	1	1	0	0.1	0	0	1	0	0	0	0	0	0	0	0	0	0	0	0	0	0	0	0	0	0	0
84057	MND1	1	1	0	0.1	0	0	1	0	0	0	0	0	0	0	0	0	0	0	0	0	0	0	0	0	0	0
51454	GULP1	1	1	0	0.1	0	0	1	0	0	0	0	0	0	0	0	0	0	0	0	0	0	0	0	0	0	0
2589	GALNT1	1	1	0	0.1	0	0	1	0	0	0	0	0	0	0	0	0	0	0	0	0	0	0	0	0	0	0
83940	TATDN1	1	1	0	0.1	0	0	1	0	0	0	0	0	0	0	0	0	0	0	0	0	0	0	0	0	0	0
84894	LINGO1	1	1	0	0.1	0	0	1	0	0	0	0	0	0	0	0	0	0	0	0	0	0	0	0	0	0	0
133746	JMY	1	1	0	0.1	0	0	1	0	0	0	0	0	0	0	0	0	0	0	0	0	0	0	0	0	0	0
9638	FEZ1	1	1	0	0.1	0	0	1	0	0	0	0	0	0	0	0	0	0	0	0	0	0	0	0	0	0	0
84172	POLR1B	1	1	0	0.1	0	0	1	0	0	0	0	0	0	0	0	0	0	0	0	0	0	0	0	0	0	0
8728	ADAM19	1	1	0	0.1	0	0	1	0	0	0	0	0	0	0	0	0	0	0	0	0	0	0	0	0	0	0
65987	KCTD14	1	1	0	0.1	0	0	1	0	0	0	0	0	0	0	0	0	0	0	0	0	0	0	0	0	0	0
151195	CCNYL1	1	1	0	0.1	0	0	1	0	0	0	0	0	0	0	0	0	0	0	0	0	0	0	0	0	0	0
5588	PRKCQ	1	1	0	0.1	0	0	1	0	0	0	0	0	0	0	0	0	0	0	0	0	0	0	0	0	0	0
79695	GALNT12	1	1	0	0.1	0	0	1	0	0	0	0	0	0	0	0	0	0	0	0	0	0	0	0	0	0	0
5409	PNMT	1	1	0	0.1	0	0	1	0	0	0	0	0	0	0	0	0	0	0	0	0	0	0	0	0	0	0
9702	CEP57	1	1	0	0.1	0	0	1	0	0	0	0	0	0	0	0	0	0	0	0	0	0	0	0	0	0	0
6633	SNRPD2	1	1	0	0.1	0	0	1	0	0	0	0	0	0	0	0	0	0	0	0	0	0	0	0	0	0	0
6596	HLTF	1	1	0	0.1	0	0	1	0	0	0	0	0	0	0	0	0	0	0	0	0	0	0	0	0	0	0
10371	SEMA3A	1	1	0	0.1	0	0	1	0	0	0	0	0	0	0	0	0	0	0	0	0	0	0	0	0	0	0
80004	ESRP2	1	1	0	0.1	0	0	1	0	0	0	0	0	0	0	0	0	0	0	0	0	0	0	0	0	0	0
50628	GEMIN4	1	1	0	0.1	0	0	1	0	0	0	0	0	0	0	0	0	0	0	0	0	0	0	0	0	0	0
29920	PYCR2	1	1	0	0.1	0	0	1	0	0	0	0	0	0	0	0	0	0	0	0	0	0	0	0	0	0	0
2960	GTF2E1	1	1	0	0.1	0	0	1	0	0	0	0	0	0	0	0	0	0	0	0	0	0	0	0	0	0	0
83903	GSG2	1	1	0	0.1	0	0	1	0	0	0	0	0	0	0	0	0	0	0	0	0	0	0	0	0	0	0
284098	PIGW	1	1	0	0.1	0	0	1	0	0	0	0	0	0	0	0	0	0	0	0	0	0	0	0	0	0	0
3485	IGFBP2	1	1	0	0.1	0	0	1	0	0	0	0	0	0	0	0	0	0	0	0	0	0	0	0	0	0	0
10785	WDR4	1	1	0	0.1	0	0	1	0	0	0	0	0	0	0	0	0	0	0	0	0	0	0	0	0	0	0
91768	CABLES1	1	1	0	0.1	0	0	1	0	0	0	0	0	0	0	0	0	0	0	0	0	0	0	0	0	0	0
6781	STC1	1	1	0	0.1	0	0	1	0	0	0	0	0	0	0	0	0	0	0	0	0	0	0	0	0	0	0
11146	GLMN	1	1	0	0.1	0	0	1	0	0	0	0	0	0	0	0	0	0	0	0	0	0	0	0	0	0	0
483	ATP1B3	1	1	0	0.1	0	0	1	0	0	0	0	0	0	0	0	0	0	0	0	0	0	0	0	0	0	0
79080	CCDC86	1	1	0	0.1	0	0	1	0	0	0	0	0	0	0	0	0	0	0	0	0	0	0	0	0	0	0
27430	MAT2B	1	1	0	0.1	0	0	1	0	0	0	0	0	0	0	0	0	0	0	0	0	0	0	0	0	0	0
55236	UBA6	1	1	0	0.1	0	0	1	0	0	0	0	0	0	0	0	0	0	0	0	0	0	0	0	0	0	0
55770	EXOC2	1	1	0	0.1	0	0	1	0	0	0	0	0	0	0	0	0	0	0	0	0	0	0	0	0	0	0
54962	TIPIN	1	1	0	0.1	0	0	1	0	0	0	0	0	0	0	0	0	0	0	0	0	0	0	0	0	0	0
7079	TIMP4	1	1	0	0.1	0	0	1	0	0	0	0	0	0	0	0	0	0	0	0	0	0	0	0	0	0	0
55692	LUC7L	1	1	0	0.1	0	0	1	0	0	0	0	0	0	0	0	0	0	0	0	0	0	0	0	0	0	0
8458	TTF2	1	1	0	0.1	0	0	1	0	0	0	0	0	0	0	0	0	0	0	0	0	0	0	0	0	0	0
1854	DUT	1	1	0	0.1	0	0	1	0	0	0	0	0	0	0	0	0	0	0	0	0	0	0	0	0	0	0
4674	NAP1L2	1	1	0	0.1	0	0	1	0	0	0	0	0	0	0	0	0	0	0	0	0	0	0	0	0	0	0
3781	KCNN2	1	1	0	0.1	0	0	1	0	0	0	0	0	0	0	0	0	0	0	0	0	0	0	0	0	0	0
55839	CENPN	1	1	0	0.1	0	0	1	0	0	0	0	0	0	0	0	0	0	0	0	0	0	0	0	0	0	0
8287	USP9Y	1	1	0	0.1	0	0	1	0	0	0	0	0	0	0	0	0	0	0	0	0	0	0	0	0	0	0
23212	RRS1	1	1	0	0.1	0	0	1	0	0	0	0	0	0	0	0	0	0	0	0	0	0	0	0	0	0	0
10250	SRRM1	1	1	0	0.1	0	0	1	0	0	0	0	0	0	0	0	0	0	0	0	0	0	0	0	0	0	0
23507	LRRC8B	1	1	0	0.1	0	0	1	0	0	0	0	0	0	0	0	0	0	0	0	0	0	0	0	0	0	0
23219	FBXO28	1	1	0	0.1	0	0	1	0	0	0	0	0	0	0	0	0	0	0	0	0	0	0	0	0	0	0
7170	TPM3	1	1	0	0.1	0	0	1	0	0	0	0	0	0	0	0	0	0	0	0	0	0	0	0	0	0	0
5167	ENPP1	1	1	0	0.1	0	0	1	0	0	0	0	0	0	0	0	0	0	0	0	0	0	0	0	0	0	0
8884	SLC5A6	1	1	0	0.1	0	0	1	0	0	0	0	0	0	0	0	0	0	0	0	0	0	0	0	0	0	0
90381	TICRR	1	1	0	0.1	0	0	1	0	0	0	0	0	0	0	0	0	0	0	0	0	0	0	0	0	0	0
51611	DPH5	1	1	0	0.1	0	0	1	0	0	0	0	0	0	0	0	0	0	0	0	0	0	0	0	0	0	0
9735	KNTC1	1	1	0	0.1	0	0	1	0	0	0	0	0	0	0	0	0	0	0	0	0	0	0	0	0	0	0
79675	FASTKD1	1	1	0	0.1	0	0	1	0	0	0	0	0	0	0	0	0	0	0	0	0	0	0	0	0	0	0
55740	ENAH	1	1	0	0.1	0	0	1	0	0	0	0	0	0	0	0	0	0	0	0	0	0	0	0	0	0	0
30836	DNTTIP2	1	1	0	0.1	0	0	1	0	0	0	0	0	0	0	0	0	0	0	0	0	0	0	0	0	0	0
547	KIF1A	1	1	0	0.1	0	0	1	0	0	0	0	0	0	0	0	0	0	0	0	0	0	0	0	0	0	0
163081	ZNF567	1	1	0	0.1	0	0	1	0	0	0	0	0	0	0	0	0	0	0	0	0	0	0	0	0	0	0
51540	SCLY	1	1	0	0.1	0	0	1	0	0	0	0	0	0	0	0	0	0	0	0	0	0	0	0	0	0	0
10849	CD3EAP	1	1	0	0.1	0	0	1	0	0	0	0	0	0	0	0	0	0	0	0	0	0	0	0	0	0	0
1965	EIF2S1	1	1	0	0.1	0	0	1	0	0	0	0	0	0	0	0	0	0	0	0	0	0	0	0	0	0	0
10460	TACC3	1	1	0	0.1	0	0	1	0	0	0	0	0	0	0	0	0	0	0	0	0	0	0	0	0	0	0
1977	EIF4E	1	1	0	0.1	0	0	1	0	0	0	0	0	0	0	0	0	0	0	0	0	0	0	0	0	0	0
55319	TMA16	1	1	0	0.1	0	0	1	0	0	0	0	0	0	0	0	0	0	0	0	0	0	0	0	0	0	0
445	ASS1	1	1	0	0.1	0	0	1	0	0	0	0	0	0	0	0	0	0	0	0	0	0	0	0	0	0	0
126382	NR2C2AP	1	1	0	0.1	0	0	1	0	0	0	0	0	0	0	0	0	0	0	0	0	0	0	0	0	0	0
56475	RPRM	1	1	0	0.1	0	0	1	0	0	0	0	0	0	0	0	0	0	0	0	0	0	0	0	0	0	0
80781	COL18A1	1	1	0	0.1	0	0	1	0	0	0	0	0	0	0	0	0	0	0	0	0	0	0	0	0	0	0
10793	ZNF273	1	1	0	0.1	0	0	1	0	0	0	0	0	0	0	0	0	0	0	0	0	0	0	0	0	0	0
55646	LYAR	1	1	0	0.1	0	0	1	0	0	0	0	0	0	0	0	0	0	0	0	0	0	0	0	0	0	0
79828	METTL8	1	1	0	0.1	0	0	1	0	0	0	0	0	0	0	0	0	0	0	0	0	0	0	0	0	0	0
57291	DANCR	1	1	0	0.1	0	0	1	0	0	0	0	0	0	0	0	0	0	0	0	0	0	0	0	0	0	0
27000	DNAJC2	1	1	0	0.1	0	0	1	0	0	0	0	0	0	0	0	0	0	0	0	0	0	0	0	0	0	0
2846	LPAR4	1	1	0	0.1	0	0	1	0	0	0	0	0	0	0	0	0	0	0	0	0	0	0	0	0	0	0
51188	SS18L2	1	1	0	0.1	0	0	1	0	0	0	0	0	0	0	0	0	0	0	0	0	0	0	0	0	0	0
23149	FCHO1	1	1	0	0.1	0	0	1	0	0	0	0	0	0	0	0	0	0	0	0	0	0	0	0	0	0	0
6453	ITSN1	1	1	0	0.1	0	0	1	0	0	0	0	0	0	0	0	0	0	0	0	0	0	0	0	0	0	0
27300	ZNF544	1	1	0	0.1	0	0	1	0	0	0	0	0	0	0	0	0	0	0	0	0	0	0	0	0	0	0
10019	SH2B3	1	1	0	0.1	0	0	1	0	0	0	0	0	0	0	0	0	0	0	0	0	0	0	0	0	0	0
333926	PPM1J	1	1	0	0.1	0	0	1	0	0	0	0	0	0	0	0	0	0	0	0	0	0	0	0	0	0	0
23160	WDR43	1	1	0	0.1	0	0	1	0	0	0	0	0	0	0	0	0	0	0	0	0	0	0	0	0	0	0
25924	MYRIP	1	1	0	0.1	0	0	1	0	0	0	0	0	0	0	0	0	0	0	0	0	0	0	0	0	0	0
23779	ARHGAP8	1	1	0	0.1	0	0	1	0	0	0	0	0	0	0	0	0	0	0	0	0	0	0	0	0	0	0
323	APBB2	1	1	0	0.1	0	0	1	0	0	0	0	0	0	0	0	0	0	0	0	0	0	0	0	0	0	0
3516	RBPJ	1	1	0	0.1	0	0	1	0	0	0	0	0	0	0	0	0	0	0	0	0	0	0	0	0	0	0
6187	RPS2	1	1	0	0.1	0	0	1	0	0	0	0	0	0	0	0	0	0	0	0	0	0	0	0	0	0	0
201161	CENPV	1	1	0	0.1	0	0	1	0	0	0	0	0	0	0	0	0	0	0	0	0	0	0	0	0	0	0
27439	CECR6	1	1	0	0.1	0	0	1	0	0	0	0	0	0	0	0	0	0	0	0	0	0	0	0	0	0	0
5433	POLR2D	1	1	0	0.1	0	0	1	0	0	0	0	0	0	0	0	0	0	0	0	0	0	0	0	0	0	0
23228	PLCL2	1	1	0	0.1	0	0	1	0	0	0	0	0	0	0	0	0	0	0	0	0	0	0	0	0	0	0
80010	RMI1	1	1	0	0.1	0	0	1	0	0	0	0	0	0	0	0	0	0	0	0	0	0	0	0	0	0	0
23636	NUP62	1	1	0	0.1	0	0	1	0	0	0	0	0	0	0	0	0	0	0	0	0	0	0	0	0	0	0
6731	SRP72	1	1	0	0.1	0	0	1	0	0	0	0	0	0	0	0	0	0	0	0	0	0	0	0	0	0	0
23240	KIAA0922	1	1	0	0.1	0	0	1	0	0	0	0	0	0	0	0	0	0	0	0	0	0	0	0	0	0	0
9689	BZW1	1	1	0	0.1	0	0	1	0	0	0	0	0	0	0	0	0	0	0	0	0	0	0	0	0	0	0
7398	USP1	1	1	0	0.1	0	0	1	0	0	0	0	0	0	0	0	0	0	0	0	0	0	0	0	0	0	0
55172	DNAAF2	1	1	0	0.1	0	0	1	0	0	0	0	0	0	0	0	0	0	0	0	0	0	0	0	0	0	0
84306	PDCD2L	1	1	0	0.1	0	0	1	0	0	0	0	0	0	0	0	0	0	0	0	0	0	0	0	0	0	0
54505	DHX29	1	1	0	0.1	0	0	1	0	0	0	0	0	0	0	0	0	0	0	0	0	0	0	0	0	0	0
79596	RNF219	1	1	0	0.1	0	0	1	0	0	0	0	0	0	0	0	0	0	0	0	0	0	0	0	0	0	0
79631	EFTUD1	1	1	0	0.1	0	0	1	0	0	0	0	0	0	0	0	0	0	0	0	0	0	0	0	0	0	0
55589	BMP2K	1	1	0	0.1	0	0	1	0	0	0	0	0	0	0	0	0	0	0	0	0	0	0	0	0	0	0
64324	NSD1	1	1	0	0.1	0	0	1	0	0	0	0	0	0	0	0	0	0	0	0	0	0	0	0	0	0	0
2764	GMFB	1	1	0	0.1	0	0	1	0	0	0	0	0	0	0	0	0	0	0	0	0	0	0	0	0	0	0
340277	FAM221A	1	1	0	0.1	0	0	1	0	0	0	0	0	0	0	0	0	0	0	0	0	0	0	0	0	0	0
80110	ZNF614	1	1	0	0.1	0	0	1	0	0	0	0	0	0	0	0	0	0	0	0	0	0	0	0	0	0	0
9879	DDX46	1	1	0	0.1	0	0	1	0	0	0	0	0	0	0	0	0	0	0	0	0	0	0	0	0	0	0
2729	GCLC	1	1	0	0.1	0	0	1	0	0	0	0	0	0	0	0	0	0	0	0	0	0	0	0	0	0	0
10539	GLRX3	1	1	0	0.1	0	0	0	1	0	0	0	0	0	0	0	0	0	0	0	0	0	0	0	0	0	0
83943	IMMP2L	1	1	0	0.1	0	0	0	1	0	0	0	0	0	0	0	0	0	0	0	0	0	0	0	0	0	0
10267	RAMP1	1	1	0	0.1	0	0	0	1	0	0	0	0	0	0	0	0	0	0	0	0	0	0	0	0	0	0
3945	LDHB	1	1	0	0.1	0	0	0	1	0	0	0	0	0	0	0	0	0	0	0	0	0	0	0	0	0	0
219409	GSX1	1	1	0	0.1	0	0	0	1	0	0	0	0	0	0	0	0	0	0	0	0	0	0	0	0	0	0
79085	SLC25A23	1	1	0	0.1	0	0	0	0	0	0	0	0	0	0	0	0	0	0	0	0	0	1	0	0	0	0
375387	NRROS	1	1	0	0.1	0	0	0	0	0	0	0	0	0	0	0	0	0	0	0	0	0	1	0	0	0	0
5708	PSMD2	1	1	0	0.1	0	0	0	0	0	0	0	0	0	0	0	0	0	0	0	0	0	1	0	0	0	0
51409	HEMK1	1	1	0	0.1	0	0	0	0	0	0	0	0	0	0	0	0	0	0	0	0	0	1	0	0	0	0
23030	KDM4B	1	1	0	0.1	0	0	0	0	0	0	0	0	0	0	0	0	0	0	0	0	0	1	0	0	0	0
6651	SON	1	1	0	0.1	0	0	0	0	0	0	0	0	0	0	0	0	0	0	0	0	0	1	0	0	0	0
2873	GPS1	1	1	0	0.1	0	0	0	0	0	0	0	0	0	0	0	0	0	0	0	0	0	1	0	0	0	0
7695	ZNF136	1	1	0	0.1	0	0	0	0	0	0	0	0	0	0	0	0	0	0	0	0	0	1	0	0	0	0
2990	GUSB	1	1	0	0.1	0	0	0	0	0	0	0	0	0	0	0	0	0	0	0	0	0	1	0	0	0	0
51138	COPS4	1	1	0	0.1	0	0	0	0	0	0	0	0	0	0	0	0	0	0	0	0	0	1	0	0	0	0
55734	ZFP64	1	1	0	0.1	0	0	0	0	0	0	0	0	0	0	0	0	0	0	0	0	0	1	0	0	0	0
285180	RUFY4	1	1	0	0.1	0	0	0	0	0	0	0	0	0	0	0	0	0	0	0	0	0	1	0	0	0	0
4798	NFRKB	1	1	0	0.1	0	0	0	0	0	0	0	0	0	0	0	0	0	0	0	0	0	1	0	0	0	0
158158	RASEF	1	1	0	0.1	0	0	0	0	0	0	0	0	0	0	0	0	0	0	0	0	0	1	0	0	0	0
824	CAPN2	1	1	0	0.1	0	0	0	0	0	0	0	0	0	0	0	0	0	0	0	0	0	1	0	0	0	0
9792	SERTAD2	1	1	0	0.1	0	0	0	0	0	0	0	0	0	0	0	0	0	0	0	0	0	1	0	0	0	0
93624	TADA2B	1	1	0	0.1	0	0	0	0	0	0	0	0	0	0	0	0	0	0	0	0	0	1	0	0	0	0
84107	ZIC4	1	1	0	0.1	0	0	0	0	0	0	0	0	0	0	0	0	0	0	0	0	0	1	0	0	0	0
79716	NPEPL1	1	1	0	0.1	0	0	0	0	0	0	0	0	0	0	0	0	0	0	0	0	0	1	0	0	0	0
7538	ZFP36	1	1	0	0.1	0	0	0	0	0	0	0	0	0	0	0	0	0	0	0	0	0	1	0	0	0	0
284439	SLC25A42	1	1	0	0.1	0	0	0	0	0	0	0	0	0	0	0	0	0	0	0	0	0	1	0	0	0	0
3054	HCFC1	1	1	0	0.1	0	0	0	0	0	0	0	0	0	0	0	0	0	0	0	0	0	1	0	0	0	0
9931	HELZ	1	1	0	0.1	0	0	0	0	0	0	0	0	0	0	0	0	0	0	0	0	0	1	0	0	0	0
1535	CYBA	1	1	0	0.1	0	0	0	0	0	0	0	0	0	0	0	0	0	0	0	0	0	1	0	0	0	0
4337	MOCS1	1	1	0	0.1	0	0	0	0	0	0	0	0	0	0	0	0	0	0	0	0	0	1	0	0	0	0
81855	SFXN3	1	1	0	0.1	0	0	0	0	0	0	0	0	0	0	0	0	0	0	0	0	0	1	0	0	0	0
81853	TMEM14B	1	1	0	0.1	0	0	0	0	0	0	0	0	0	0	0	0	0	0	0	0	0	1	0	0	0	0
59269	HIVEP3	1	1	0	0.1	0	0	0	0	0	0	0	0	0	0	0	0	0	0	0	0	0	1	0	0	0	0
8989	TRPA1	1	1	0	0.1	0	0	0	0	0	0	0	0	0	0	0	0	0	0	0	0	0	1	0	0	0	0
403313	PPAPDC2	1	1	0	0.1	0	0	0	0	0	0	0	0	0	0	0	0	0	0	0	0	0	1	0	0	0	0
9961	MVP	1	1	0	0.1	0	0	0	0	0	0	0	0	0	0	0	0	0	0	0	0	0	1	0	0	0	0
26	AOC1	1	1	0	0.1	0	0	0	0	0	0	0	0	0	0	0	0	0	0	0	0	0	1	0	0	0	0
54925	ZSCAN32	1	1	0	0.1	0	0	0	0	0	0	0	0	0	0	0	0	0	0	0	0	0	1	0	0	0	0
2107	ETF1	1	1	0	0.1	0	0	0	0	0	0	0	0	0	0	0	0	0	0	0	0	0	1	0	0	0	0
1649	DDIT3	1	1	0	0.1	0	0	0	0	0	0	0	0	0	0	0	0	0	0	0	0	0	1	0	0	0	0
8403	SOX14	1	1	0	0.1	0	0	0	0	0	0	0	0	0	0	0	0	0	0	0	0	0	1	0	0	0	0
140767	NRSN1	1	1	0	0.1	0	0	0	0	0	0	0	0	0	0	0	0	0	0	0	0	0	1	0	0	0	0
55009	C19orf24	1	1	0	0.1	0	0	0	0	0	0	0	0	0	0	0	0	0	0	0	0	0	1	0	0	0	0
51378	ANGPT4	1	1	0	0.1	0	0	0	0	0	0	0	0	0	0	0	0	0	0	0	0	0	1	0	0	0	0
81576	CCDC130	1	1	0	0.1	0	0	0	0	0	0	0	0	0	0	0	0	0	0	0	0	0	1	0	0	0	0
400221	FLJ22447	1	1	0	0.1	0	0	0	0	0	0	0	0	0	0	0	0	0	0	0	0	0	1	0	0	0	0
390790	ARL5C	1	1	0	0.1	0	0	0	0	0	0	0	0	0	0	0	0	0	0	0	0	0	1	0	0	0	0
334	APLP2	1	1	0	0.1	0	0	0	0	0	0	0	0	0	0	0	0	0	0	0	0	0	1	0	0	0	0
1389	CREBL2	1	1	0	0.1	0	0	0	0	0	0	0	0	0	0	0	0	0	0	0	0	0	1	0	0	0	0
400916	CHCHD10	1	1	0	0.1	0	0	0	0	0	0	0	0	0	0	0	0	0	0	0	0	0	1	0	0	0	0
255877	BCL6B	1	1	0	0.1	0	0	0	0	0	0	0	0	0	0	0	0	0	0	0	0	0	1	0	0	0	0
407975	MIR17HG	1	1	0	0.1	0	0	0	0	0	0	0	0	0	0	0	0	0	0	0	0	0	1	0	0	0	0
51755	CDK12	1	1	0	0.1	0	0	0	0	0	0	0	0	0	0	0	0	0	0	0	0	0	1	0	0	0	0
400661	LOC400661	1	1	0	0.1	0	0	0	0	0	0	0	0	0	0	0	0	0	0	0	0	0	1	0	0	0	0
8435	SOAT2	1	1	0	0.1	0	0	0	0	0	0	0	0	0	0	0	0	0	0	0	0	0	1	0	0	0	0
51585	PCF11	1	1	0	0.1	0	0	0	0	0	0	0	0	0	0	0	0	0	0	0	0	0	1	0	0	0	0
153657	TTC23L	1	1	0	0.1	0	0	0	0	0	0	0	0	0	0	0	0	0	0	0	0	0	1	0	0	0	0
10893	MMP24	1	1	0	0.1	0	0	0	0	0	0	0	0	0	0	0	0	0	0	0	0	0	1	0	0	0	0
253832	ZDHHC20	1	1	0	0.1	0	0	0	0	0	0	0	0	0	0	0	0	0	0	0	0	0	1	0	0	0	0
283899	INO80E	1	1	0	0.1	0	0	0	0	0	0	0	0	0	0	0	0	0	0	0	0	0	1	0	0	0	0
254552	NUDT8	1	1	0	0.1	0	0	0	0	0	0	0	0	0	0	0	0	0	0	0	0	0	1	0	0	0	0
7584	ZNF35	1	1	0	0.1	0	0	0	0	0	0	0	0	0	0	0	0	0	0	0	0	0	1	0	0	0	0
10445	MCRS1	1	1	0	0.1	0	0	0	0	0	0	0	0	0	0	0	0	0	0	0	0	0	1	0	0	0	0
219541	MED19	1	1	0	0.1	0	0	0	0	0	0	0	0	0	0	0	0	0	0	0	0	0	1	0	0	0	0
56979	PRDM9	1	1	0	0.1	0	0	0	0	0	0	0	0	0	0	0	0	0	0	0	0	0	1	0	0	0	0
151658	LINC00635	1	1	0	0.1	0	0	0	0	0	0	0	0	0	0	0	0	0	0	0	0	0	1	0	0	0	0
7175	TPR	1	1	0	0.1	0	0	0	0	0	0	0	0	0	0	0	0	0	0	0	0	0	1	0	0	0	0
84061	MAGT1	1	1	0	0.1	0	0	0	0	0	0	0	0	0	0	0	0	0	0	0	0	0	1	0	0	0	0
5626	PROP1	1	1	0	0.1	0	0	0	0	0	0	0	0	0	0	0	0	0	0	0	0	0	1	0	0	0	0
119467	CLRN3	1	1	0	0.1	0	0	0	0	0	0	0	0	0	0	0	0	0	0	0	0	0	1	0	0	0	0
3489	IGFBP6	1	1	0	0.1	0	0	0	0	0	0	0	0	0	0	0	0	0	0	0	0	0	1	0	0	0	0
374920	C19orf68	1	1	0	0.1	0	0	0	0	0	0	0	0	0	0	0	0	0	0	0	0	0	1	0	0	0	0
4761	NEUROD2	1	1	0	0.1	0	0	0	0	0	0	0	0	0	0	0	0	0	0	0	0	0	1	0	0	0	0
29998	GLTSCR1	1	1	0	0.1	0	0	0	0	0	0	0	0	0	0	0	0	0	0	0	0	0	1	0	0	0	0
8545	CGGBP1	1	1	0	0.1	0	0	0	0	0	0	0	0	0	0	0	0	0	0	0	0	0	1	0	0	0	0
157869	SBSPON	1	1	0	0.1	0	0	0	0	0	0	0	0	0	0	0	0	0	0	0	0	0	1	0	0	0	0
5429	POLH	1	1	0	0.1	0	0	0	0	0	0	0	0	0	0	0	0	0	0	0	0	0	1	0	0	0	0
80325	ABTB1	1	1	0	0.1	0	0	0	0	0	0	0	0	0	0	0	0	0	0	0	0	0	1	0	0	0	0
339221	ENPP7	1	1	0	0.1	0	0	0	0	0	0	0	0	0	0	0	0	0	0	0	0	0	1	0	0	0	0
4957	ODF2	1	1	0	0.1	0	0	0	0	0	0	0	0	0	0	0	0	0	0	0	0	0	1	0	0	0	0
343578	ARHGAP40	1	1	0	0.1	0	0	0	0	0	0	0	0	0	0	0	0	0	0	0	0	0	1	0	0	0	0
55502	HES6	1	1	0	0.1	0	0	0	0	0	0	0	0	0	0	0	0	0	0	0	0	0	1	0	0	0	0
388324	INCA1	1	1	0	0.1	0	0	0	0	0	0	0	0	0	0	0	0	0	0	0	0	0	1	0	0	0	0
23389	MED13L	1	1	0	0.1	0	0	0	0	0	0	0	0	0	0	0	0	0	0	0	0	0	1	0	0	0	0
9123	SLC16A3	1	1	0	0.1	0	0	0	0	0	0	0	0	0	0	0	0	0	0	0	0	0	1	0	0	0	0
3140	MR1	1	1	0	0.1	0	0	0	0	0	0	0	0	0	0	0	0	0	0	0	0	0	1	0	0	0	0
83874	TBC1D10A	1	1	0	0.1	0	0	0	0	0	0	0	0	0	0	0	0	0	0	0	0	0	1	0	0	0	0
84740	AFAP1-AS1	1	1	0	0.1	0	0	0	0	0	0	0	0	0	0	0	0	0	0	0	0	0	1	0	0	0	0
5055	SERPINB2	1	1	0	0.1	0	0	0	0	0	0	0	0	0	0	0	0	0	0	0	0	0	1	0	0	0	0
9318	COPS2	1	1	0	0.1	0	0	0	0	0	0	0	0	0	0	0	0	0	0	0	0	0	1	0	0	0	0
2743	GLRB	1	1	0	0.1	0	0	0	0	0	0	0	0	0	0	0	0	0	0	0	0	0	1	0	0	0	0
1819	DRG2	1	1	0	0.1	0	0	0	0	0	0	0	0	0	0	0	0	0	0	0	0	0	1	0	0	0	0
160777	CCDC60	1	1	0	0.1	0	0	0	0	0	0	0	0	0	0	0	0	0	0	0	0	0	1	0	0	0	0
1301	COL11A1	1	1	0	0.1	0	0	0	0	0	0	0	0	0	0	0	0	0	0	0	0	0	1	0	0	0	0
344658	SAMD7	1	1	0	0.1	0	0	0	0	0	0	0	0	0	0	0	0	0	0	0	0	0	1	0	0	0	0
4686	NCBP1	1	1	0	0.1	0	0	0	0	0	0	0	0	0	0	0	0	0	0	0	0	0	1	0	0	0	0
407738	FAM19A1	1	1	0	0.1	0	0	0	0	0	0	0	0	0	0	0	0	0	0	0	0	0	1	0	0	0	0
283537	SLC46A3	1	1	0	0.1	0	0	0	0	0	0	0	0	0	0	0	0	0	0	0	0	0	1	0	0	0	0
2703	GJA8	1	1	0	0.1	0	0	0	0	0	0	0	0	0	0	0	0	0	0	0	0	0	1	0	0	0	0
9862	MED24	1	1	0	0.1	0	0	0	0	0	0	0	0	0	0	0	0	0	0	0	0	0	1	0	0	0	0
307	ANXA4	1	1	0	0.1	0	0	0	0	0	0	0	0	0	0	0	0	0	0	0	0	0	1	0	0	0	0
56901	NDUFA4L2	1	1	0	0.1	0	0	0	0	0	0	0	0	0	0	0	0	0	0	0	0	0	1	0	0	0	0
8890	EIF2B4	1	1	0	0.1	0	0	0	0	0	0	0	0	0	0	0	0	0	0	0	0	0	1	0	0	0	0
79652	TMEM204	1	1	0	0.1	0	0	0	0	0	0	0	0	0	0	0	0	0	0	0	0	0	1	0	0	0	0
54799	MBTD1	1	1	0	0.1	0	0	0	0	0	0	0	0	0	0	0	0	0	0	0	0	0	1	0	0	0	0
151393	RMDN2	1	1	0	0.1	0	0	0	0	0	0	0	0	0	0	0	0	0	0	0	0	0	1	0	0	0	0
3811	KIR3DL1	1	1	0	0.1	0	0	0	0	0	0	0	0	0	0	0	0	0	0	0	0	0	1	0	0	0	0
9968	MED12	1	1	0	0.1	0	0	0	0	0	0	0	0	0	0	0	0	0	0	0	0	0	1	0	0	0	0
24140	FTSJ1	1	1	0	0.1	0	0	0	0	0	0	0	0	0	0	0	0	0	0	0	0	0	1	0	0	0	0
8892	EIF2B2	1	1	0	0.1	0	0	0	0	0	0	0	0	0	0	0	0	0	0	0	0	0	1	0	0	0	0
84063	KIRREL2	1	1	0	0.1	0	0	0	0	0	0	0	0	0	0	0	0	0	0	0	0	0	1	0	0	0	0
79883	PODNL1	1	1	0	0.1	0	0	0	0	0	0	0	0	0	0	0	0	0	0	0	0	0	1	0	0	0	0
92370	PXYLP1	1	1	0	0.1	0	0	0	0	0	0	0	0	0	0	0	0	0	0	0	0	0	1	0	0	0	0
8115	TCL1A	1	1	0	0.1	0	0	0	0	0	0	0	0	0	0	0	0	0	0	0	0	0	1	0	0	0	0
51248	PDZD11	1	1	0	0.1	0	0	0	0	0	0	0	0	0	0	0	0	0	0	0	0	0	1	0	0	0	0
80335	WDR82	1	1	0	0.1	0	0	0	0	0	0	0	0	0	0	0	0	0	0	0	0	0	1	0	0	0	0
63910	SLC17A9	1	1	0	0.1	0	0	0	0	0	0	0	0	0	0	0	0	0	0	0	0	0	1	0	0	0	0
259232	NALCN	1	1	0	0.1	0	0	0	0	0	0	0	0	0	0	0	0	0	0	0	0	0	1	0	0	0	0
23746	AIPL1	1	1	0	0.1	0	0	0	0	0	0	0	0	0	0	0	0	0	0	0	0	0	1	0	0	0	0
25949	SYF2	1	1	0	0.1	0	0	0	0	0	0	0	0	0	0	0	0	0	0	0	0	0	1	0	0	0	0
27063	ANKRD1	1	1	0	0.1	0	0	0	0	0	0	0	0	0	0	0	0	0	0	0	0	0	1	0	0	0	0
7851	MALL	1	1	0	0.1	0	0	0	0	0	0	0	0	0	0	0	0	0	0	0	0	0	1	0	0	0	0
83999	KREMEN1	1	1	0	0.1	0	0	0	0	0	0	0	0	0	0	0	0	0	0	0	0	0	1	0	0	0	0
256006	ANKRD31	1	1	0	0.1	0	0	0	0	0	0	0	0	0	0	0	0	0	0	0	0	0	1	0	0	0	0
389257	LRRC14B	1	1	0	0.1	0	0	0	0	0	0	0	0	0	0	0	0	0	0	0	0	0	1	0	0	0	0
400242	DICER1-AS1	1	1	0	0.1	0	0	0	0	0	0	0	0	0	0	0	0	0	0	0	0	0	1	0	0	0	0
84991	RBM17	1	1	0	0.1	0	0	0	0	0	0	0	0	0	0	0	0	0	0	0	0	0	1	0	0	0	0
400604	TOB1-AS1	1	1	0	0.1	0	0	0	0	0	0	0	0	0	0	0	0	0	0	0	0	0	1	0	0	0	0
283777	FAM169B	1	1	0	0.1	0	0	0	0	0	0	0	0	0	0	0	0	0	0	0	0	0	1	0	0	0	0
1325	CORT	1	1	0	0.1	0	0	0	0	0	0	0	0	0	0	0	0	0	0	0	0	0	1	0	0	0	0
353135	LCE1E	1	1	0	0.1	0	0	0	0	0	0	0	0	0	0	0	0	0	0	0	0	0	1	0	0	0	0
124245	ZC3H18	1	1	0	0.1	0	0	0	0	0	0	0	0	0	0	0	0	0	0	0	0	0	1	0	0	0	0
10482	NXF1	1	1	0	0.1	0	0	0	0	0	0	0	0	0	0	0	0	0	0	0	0	0	1	0	0	0	0
160428	ALDH1L2	1	1	0	0.1	0	0	0	0	0	0	0	0	0	0	0	0	0	0	0	0	0	1	0	0	0	0
399968	PATE4	1	1	0	0.1	0	0	0	0	0	0	0	0	0	0	0	0	0	0	0	0	0	1	0	0	0	0
81623	DEFB126	1	1	0	0.1	0	0	0	0	0	0	0	0	0	0	0	0	0	0	0	0	0	1	0	0	0	0
387	RHOA	1	1	0	0.1	0	0	0	0	0	0	0	0	0	0	0	0	0	0	0	0	0	1	0	0	0	0
22887	FOXJ3	1	1	0	0.1	0	0	0	0	0	0	0	0	0	0	0	0	0	0	0	0	0	1	0	0	0	0
64748	LPPR2	1	1	0	0.1	0	0	0	0	0	0	0	0	0	0	0	0	0	0	0	0	0	1	0	0	0	0
94121	SYTL4	1	1	0	0.1	0	0	0	0	0	0	0	0	0	0	0	0	0	0	0	0	0	1	0	0	0	0
1769	DNAH8	1	1	0	0.1	0	0	0	0	0	0	0	0	0	0	0	0	0	0	0	0	0	1	0	0	0	0
2512	FTL	1	1	0	0.1	0	0	0	0	0	0	0	0	0	0	0	0	0	0	0	0	0	1	0	0	0	0
26071	FAM127B	1	1	0	0.1	0	0	0	0	0	0	0	0	0	0	0	0	0	0	0	0	0	1	0	0	0	0
9896	FIG4	1	1	0	0.1	0	0	0	0	0	0	0	0	0	0	0	0	0	0	0	0	0	1	0	0	0	0
6873	TAF2	1	1	0	0.1	0	0	0	0	0	0	0	0	0	0	0	0	0	0	0	0	0	1	0	0	0	0
6950	TCP1	1	1	0	0.1	0	0	0	0	0	0	0	0	0	0	0	0	0	0	0	0	0	1	0	0	0	0
7450	VWF	1	1	0	0.1	0	0	0	0	0	0	0	0	0	0	0	0	0	0	0	0	0	1	0	0	0	0
53822	FXYD7	1	1	0	0.1	0	0	0	0	0	0	0	0	0	0	0	0	0	0	0	0	0	1	0	0	0	0
154091	SLC2A12	1	1	0	0.1	0	0	0	0	0	0	0	0	0	0	0	0	0	0	0	0	0	1	0	0	0	0
9038	TAAR5	1	1	0	0.1	0	0	0	0	0	0	0	0	0	0	0	0	0	0	0	0	0	1	0	0	0	0
4324	MMP15	1	1	0	0.1	0	0	0	0	0	0	0	0	0	0	0	0	0	0	0	0	0	1	0	0	0	0
1877	E4F1	1	1	0	0.1	0	0	0	0	0	0	0	0	0	0	0	0	0	0	0	0	0	1	0	0	0	0
2016	EMX1	1	1	0	0.1	0	0	0	0	0	0	0	0	0	0	0	0	0	0	0	0	0	1	0	0	0	0
1585	CYP11B2	1	1	0	0.1	0	0	0	0	0	0	0	0	0	0	0	0	0	0	0	0	0	1	0	0	0	0
2953	GSTT2	1	1	0	0.1	0	0	0	0	0	0	0	0	0	0	0	0	0	0	0	0	0	1	0	0	0	0
7407	VARS	1	1	0	0.1	0	0	0	0	0	0	0	0	0	0	0	0	0	0	0	0	0	1	0	0	0	0
161753	ODF3L1	1	1	0	0.1	0	0	0	0	0	0	0	0	0	0	0	0	0	0	0	0	0	1	0	0	0	0
23332	CLASP1	1	1	0	0.1	0	0	0	0	0	0	0	0	0	0	0	0	0	0	0	0	0	1	0	0	0	0
80125	CCDC33	1	1	0	0.1	0	0	0	0	0	0	0	0	0	0	0	0	0	0	0	0	0	1	0	0	0	0
9588	PRDX6	1	1	0	0.1	0	0	0	0	0	0	0	0	0	0	0	0	0	0	0	0	0	1	0	0	0	0
9050	PSTPIP2	1	1	0	0.1	0	0	0	0	0	0	0	0	0	0	0	0	0	0	0	0	0	1	0	0	0	0
4991	OR1D2	1	1	0	0.1	0	0	0	0	0	0	0	0	0	0	0	0	0	0	0	0	0	1	0	0	0	0
154386	C6orf195	1	1	0	0.1	0	0	0	0	0	0	0	0	0	0	0	0	0	0	0	0	0	1	0	0	0	0
8812	CCNK	1	1	0	0.1	0	0	0	0	0	0	0	0	0	0	0	0	0	0	0	0	0	1	0	0	0	0
84651	SPINK7	1	1	0	0.1	0	0	0	0	0	0	0	0	0	0	0	0	0	0	0	0	0	1	0	0	0	0
283860	LINC00304	1	1	0	0.1	0	0	0	0	0	0	0	0	0	0	0	0	0	0	0	0	0	1	0	0	0	0
23019	CNOT1	1	1	0	0.1	0	0	0	0	0	0	0	0	0	0	0	0	0	0	0	0	0	1	0	0	0	0
253260	RICTOR	1	1	0	0.1	0	0	0	0	0	0	0	0	0	0	0	0	0	0	0	0	0	1	0	0	0	0
55234	SMU1	1	1	0	0.1	0	0	0	0	0	0	0	0	0	0	0	0	0	0	0	0	0	1	0	0	0	0
390792	KRT39	1	1	0	0.1	0	0	0	0	0	0	0	0	0	0	0	0	0	0	0	0	0	1	0	0	0	0
84530	SRRM4	1	1	0	0.1	0	0	0	0	0	0	0	0	0	0	0	0	0	0	0	0	0	1	0	0	0	0
10574	CCT7	1	1	0	0.1	0	0	0	0	0	0	0	0	0	0	0	0	0	0	0	0	0	1	0	0	0	0
9229	DLGAP1	1	1	0	0.1	0	0	0	0	0	0	0	0	0	0	0	0	0	0	0	0	0	1	0	0	0	0
8241	RBM10	1	1	0	0.1	0	0	0	0	0	0	0	0	0	0	0	0	0	0	0	0	0	1	0	0	0	0
84532	ACSS1	1	1	0	0.1	0	0	0	0	0	0	0	0	0	0	0	0	0	0	0	0	0	1	0	0	0	0
51094	ADIPOR1	1	1	0	0.1	0	0	0	0	0	0	0	0	0	0	0	0	0	0	0	0	0	1	0	0	0	0
10120	ACTR1B	1	1	0	0.1	0	0	0	0	0	0	0	0	0	0	0	0	0	0	0	0	0	1	0	0	0	0
348793	WDR53	1	1	0	0.1	0	0	0	0	0	0	0	0	0	0	0	0	0	0	0	0	0	1	0	0	0	0
7268	TTC4	1	1	0	0.1	0	0	0	0	0	0	0	0	0	0	0	0	0	0	0	0	0	1	0	0	0	0
2935	GSPT1	1	1	0	0.1	0	0	0	0	0	0	0	0	0	0	0	0	0	0	0	0	0	1	0	0	0	0
124602	KIF19	1	1	0	0.1	0	0	0	0	0	0	0	0	0	0	0	0	0	0	0	0	0	1	0	0	0	0
1016	CDH18	1	1	0	0.1	0	0	0	0	0	0	0	0	0	0	0	0	0	0	0	0	0	1	0	0	0	0
84913	ATOH8	1	1	0	0.1	0	0	0	0	0	0	0	0	0	0	0	0	0	0	0	0	0	1	0	0	0	0
10123	ARL4C	1	1	0	0.1	0	0	0	0	0	0	0	0	0	0	0	0	0	0	0	0	0	1	0	0	0	0
28986	MAGEH1	1	1	0	0.1	0	0	0	0	0	0	0	0	0	0	0	0	0	0	0	0	0	1	0	0	0	0
79723	SUV39H2	1	1	0	0.1	0	0	0	0	0	0	0	0	0	0	0	0	0	0	0	0	0	1	0	0	0	0
283951	C16orf91	1	1	0	0.1	0	0	0	0	0	0	0	0	0	0	0	0	0	0	0	0	0	1	0	0	0	0
9697	TRAM2	1	1	0	0.1	0	0	0	0	0	0	0	0	0	0	0	0	0	0	0	0	0	1	0	0	0	0
57455	REXO1	1	1	0	0.1	0	0	0	0	0	0	0	0	0	0	0	0	0	0	0	0	0	1	0	0	0	0
378884	NHLRC1	1	1	0	0.1	0	0	0	0	0	0	0	0	0	0	0	0	0	0	0	0	0	1	0	0	0	0
29119	CTNNA3	1	1	0	0.1	0	0	0	0	0	0	0	0	0	0	0	0	0	0	0	0	0	1	0	0	0	0
9706	ULK2	1	1	0	0.1	0	0	0	0	0	0	0	0	0	0	0	0	0	0	0	0	0	1	0	0	0	0
26190	FBXW2	1	1	0	0.1	0	0	0	0	0	0	0	0	0	0	0	0	0	0	0	0	0	1	0	0	0	0
346689	KLRG2	1	1	0	0.1	0	0	0	0	0	0	0	0	0	0	0	0	0	0	0	0	0	1	0	0	0	0
51009	DERL2	1	1	0	0.1	0	0	0	0	0	0	0	0	0	0	0	0	0	0	0	0	0	1	0	0	0	0
9953	HS3ST3B1	1	1	0	0.1	0	0	0	0	0	0	0	0	0	0	0	0	0	0	0	0	0	1	0	0	0	0
402682	UFSP1	1	1	0	0.1	0	0	0	0	0	0	0	0	0	0	0	0	0	0	0	0	0	1	0	0	0	0
387856	CCDC184	1	1	0	0.1	0	0	0	0	0	0	0	0	0	0	0	0	0	0	0	0	0	1	0	0	0	0
150248	C22orf15	1	1	0	0.1	0	0	0	0	0	0	0	0	0	0	0	0	0	0	0	0	0	1	0	0	0	0
2110	ETFDH	1	1	0	0.1	0	0	0	0	0	0	0	0	0	0	0	0	0	0	0	0	0	1	0	0	0	0
2033	EP300	1	1	0	0.1	0	0	0	0	0	0	0	0	0	0	0	0	0	0	0	0	0	1	0	0	0	0
2014	EMP3	1	1	0	0.1	0	0	0	0	0	0	0	0	0	0	0	0	0	0	0	0	0	1	0	0	0	0
284573	LINC00303	1	1	0	0.1	0	0	0	0	0	0	0	0	0	0	0	0	0	0	0	0	0	1	0	0	0	0
130557	ZNF513	1	1	0	0.1	0	0	0	0	0	0	0	0	0	0	0	0	0	0	0	0	0	1	0	0	0	0
403278	OR5K4	1	1	0	0.1	0	0	0	0	0	0	0	0	0	0	0	0	0	0	0	0	0	1	0	0	0	0
256356	GK5	1	1	0	0.1	0	0	0	0	0	0	0	0	0	0	0	0	0	0	0	0	0	1	0	0	0	0
26233	FBXL6	1	1	0	0.1	0	0	0	0	0	0	0	0	0	0	0	0	0	0	0	0	0	1	0	0	0	0
158866	ZDHHC15	1	1	0	0.1	0	0	0	0	0	0	0	0	0	0	0	0	0	0	0	0	0	1	0	0	0	0
7439	BEST1	1	1	0	0.1	0	0	0	0	0	0	0	0	0	0	0	0	0	0	0	0	0	1	0	0	0	0
23245	ASTN2	1	1	0	0.1	0	0	0	0	0	0	0	0	0	0	0	0	0	0	0	0	0	1	0	0	0	0
245802	MS4A6E	1	1	0	0.1	0	0	0	0	0	0	0	0	0	0	0	0	0	0	0	0	0	1	0	0	0	0
284402	SCGB2B2	1	1	0	0.1	0	0	0	0	0	0	0	0	0	0	0	0	0	0	0	0	0	1	0	0	0	0
51148	CERCAM	1	1	0	0.1	0	0	0	0	0	0	0	0	0	0	0	0	0	0	0	0	0	1	0	0	0	0
9170	LPAR2	1	1	0	0.1	0	0	0	0	0	0	0	0	0	0	0	0	0	0	0	0	0	1	0	0	0	0
51258	MRPL51	1	1	0	0.1	0	0	0	0	0	0	0	0	0	0	0	0	0	0	0	0	0	1	0	0	0	0
154092	LINC01010	1	1	0	0.1	0	0	0	0	0	0	0	0	0	0	0	0	0	0	0	0	0	1	0	0	0	0
5648	MASP1	1	1	0	0.1	0	0	0	0	0	0	0	0	0	0	0	0	0	0	0	0	0	1	0	0	0	0
339327	ZNF546	1	1	0	0.1	0	0	0	0	0	0	0	0	0	0	0	0	0	0	0	0	0	1	0	0	0	0
259291	TAS2R45	1	1	0	0.1	0	0	0	0	0	0	0	0	0	0	0	0	0	0	0	0	0	1	0	0	0	0
1376	CPT2	1	1	0	0.1	0	0	0	0	0	0	0	0	0	0	0	0	0	0	0	0	0	1	0	0	0	0
56923	NMUR2	1	1	0	0.1	0	0	0	0	0	0	0	0	0	0	0	0	0	0	0	0	0	1	0	0	0	0
10039	PARP3	1	1	0	0.1	0	0	0	0	0	0	0	0	0	0	0	0	0	0	0	0	0	1	0	0	0	0
3396	ICT1	1	1	0	0.1	0	0	0	0	0	0	0	0	0	0	0	0	0	0	0	0	0	1	0	0	0	0
343263	MYBPHL	1	1	0	0.1	0	0	0	0	0	0	0	0	0	0	0	0	0	0	0	0	0	1	0	0	0	0
55971	BAIAP2L1	1	1	0	0.1	0	0	0	0	0	0	0	0	0	0	0	0	0	0	0	0	0	1	0	0	0	0
55065	SLC52A1	1	1	0	0.1	0	0	0	0	0	0	0	0	0	0	0	0	0	0	0	0	0	1	0	0	0	0
200558	APLF	1	1	0	0.1	0	0	0	0	0	0	0	0	0	0	0	0	0	0	0	0	0	1	0	0	0	0
55259	CASC1	1	1	0	0.1	0	0	0	0	0	0	0	0	0	0	0	0	0	0	0	0	0	1	0	0	0	0
8756	ADAM7	1	1	0	0.1	0	0	0	0	0	0	0	0	0	0	0	0	0	0	0	0	0	1	0	0	0	0
54431	DNAJC10	1	1	0	0.1	0	0	0	0	0	0	0	0	0	0	0	0	0	0	0	0	0	1	0	0	0	0
1510	CTSE	1	1	0	0.1	0	0	0	0	0	0	0	0	0	0	0	0	0	0	0	0	0	1	0	0	0	0
3381	IBSP	1	1	0	0.1	0	0	0	0	0	0	0	0	0	0	0	0	0	0	0	0	0	1	0	0	0	0
4606	MYBPC2	1	1	0	0.1	0	0	0	0	0	0	0	0	0	0	0	0	0	0	0	0	0	1	0	0	0	0
998	CDC42	1	1	0	0.1	0	0	0	0	0	0	0	0	0	0	0	0	0	0	0	0	0	1	0	0	0	0
83854	ANGPTL6	1	1	0	0.1	0	0	0	0	0	0	0	0	0	0	0	0	0	0	0	0	0	1	0	0	0	0
10168	ZNF197	1	1	0	0.1	0	0	0	0	0	0	0	0	0	0	0	0	0	0	0	0	0	1	0	0	0	0
478	ATP1A3	1	1	0	0.1	0	0	0	0	0	0	0	0	0	0	0	0	0	0	0	0	0	1	0	0	0	0
1211	CLTA	1	1	0	0.1	0	0	0	0	0	0	0	0	0	0	0	0	0	0	0	0	0	1	0	0	0	0
64241	ABCG8	1	1	0	0.1	0	0	0	0	0	0	0	0	0	0	0	0	0	0	0	0	0	1	0	0	0	0
8358	HIST1H3B	1	1	0	0.1	0	0	0	0	0	0	0	0	0	0	0	0	0	0	0	0	0	1	0	0	0	0
4958	OMD	1	1	0	0.1	0	0	0	0	0	0	0	0	0	0	0	0	0	0	0	0	0	1	0	0	0	0
84498	FAM120B	1	1	0	0.1	0	0	0	0	0	0	0	0	0	0	0	0	0	0	0	0	0	1	0	0	0	0
340515	LINC01501	1	1	0	0.1	0	0	0	0	0	0	0	0	0	0	0	0	0	0	0	0	0	1	0	0	0	0
2206	MS4A2	1	1	0	0.1	0	0	0	0	0	0	0	0	0	0	0	0	0	0	0	0	0	1	0	0	0	0
6879	TAF7	1	1	0	0.1	0	0	0	0	0	0	0	0	0	0	0	0	0	0	0	0	0	1	0	0	0	0
23067	SETD1B	1	1	0	0.1	0	0	0	0	0	0	0	0	0	0	0	0	0	0	0	0	0	1	0	0	0	0
2967	GTF2H3	1	1	0	0.1	0	0	0	0	0	0	0	0	0	0	0	0	0	0	0	0	0	1	0	0	0	0
5032	P2RY11	1	1	0	0.1	0	0	0	0	0	0	0	0	0	0	0	0	0	0	0	0	0	1	0	0	0	0
284551	LINC01226	1	1	0	0.1	0	0	0	0	0	0	0	0	0	0	0	0	0	0	0	0	0	1	0	0	0	0
9817	KEAP1	1	1	0	0.1	0	0	0	0	0	0	0	0	0	0	0	0	0	0	0	0	0	1	0	0	0	0
158219	TTC39B	1	1	0	0.1	0	0	0	0	0	0	0	0	0	0	0	0	0	0	0	0	0	1	0	0	0	0
5900	RALGDS	1	1	0	0.1	0	0	0	0	0	0	0	0	0	0	0	0	0	0	0	0	0	1	0	0	0	0
9150	CTDP1	1	1	0	0.1	0	0	0	0	0	0	0	0	0	0	0	0	0	0	0	0	0	1	0	0	0	0
9440	MED17	1	1	0	0.1	0	0	0	0	0	0	0	0	0	0	0	0	0	0	0	0	0	1	0	0	0	0
64431	ACTR6	1	1	0	0.1	0	0	0	0	0	0	0	0	0	0	0	0	0	0	0	0	0	1	0	0	0	0
139716	GAB3	1	1	0	0.1	0	0	0	0	0	0	0	0	0	0	0	0	0	0	0	0	0	1	0	0	0	0
768	CA9	1	1	0	0.1	0	0	0	0	0	0	0	0	0	0	0	0	0	0	0	0	0	1	0	0	0	0
337979	KRTAP22-1	1	1	0	0.1	0	0	0	0	0	0	0	0	0	0	0	0	0	0	0	0	0	1	0	0	0	0
54476	RNF216	1	1	0	0.1	0	0	0	0	0	0	0	0	0	0	0	0	0	0	0	0	0	1	0	0	0	0
386597	RNF144A-AS1	1	1	0	0.1	0	0	0	0	0	0	0	0	0	0	0	0	0	0	0	0	0	1	0	0	0	0
3184	HNRNPD	1	1	0	0.1	0	0	0	0	0	0	0	0	0	0	0	0	0	0	0	0	0	1	0	0	0	0
5307	PITX1	1	1	0	0.1	0	0	0	0	0	0	0	0	0	0	0	0	0	0	0	0	0	1	0	0	0	0
144715	RAD9B	1	1	0	0.1	0	0	0	0	0	0	0	0	0	0	0	0	0	0	0	0	0	1	0	0	0	0
25818	KLK5	1	1	0	0.1	0	0	0	0	0	0	0	0	0	0	0	0	0	0	0	0	0	1	0	0	0	0
7029	TFDP2	1	1	0	0.1	0	0	0	0	0	0	0	0	0	0	0	0	0	0	0	0	0	1	0	0	0	0
400165	ATP11AUN	1	1	0	0.1	0	0	0	0	0	0	0	0	0	0	0	0	0	0	0	0	0	1	0	0	0	0
91801	ALKBH8	1	1	0	0.1	0	0	0	0	0	0	0	0	0	0	0	0	0	0	0	0	0	1	0	0	0	0
4048	LTA4H	1	1	0	0.1	0	0	0	0	0	0	0	0	0	0	0	0	0	0	0	0	0	1	0	0	0	0
23558	WBP2	1	1	0	0.1	0	0	0	0	0	0	0	0	0	0	0	0	0	0	0	0	0	1	0	0	0	0
3841	KPNA5	1	1	0	0.1	0	0	0	0	0	0	0	0	0	0	0	0	0	0	0	0	0	1	0	0	0	0
92689	FAM114A1	1	1	0	0.1	0	0	0	0	0	0	0	0	0	0	0	0	0	0	0	0	0	1	0	0	0	0
6840	SVIL	1	1	0	0.1	0	0	0	0	0	0	0	0	0	0	0	0	0	0	0	0	0	1	0	0	0	0
2671	GFER	1	1	0	0.1	0	0	0	0	0	0	0	0	0	0	0	0	0	0	0	0	0	1	0	0	0	0
1339	COX6A2	1	1	0	0.1	0	0	0	0	0	0	0	0	0	0	0	0	0	0	0	0	0	1	0	0	0	0
51322	WAC	1	1	0	0.1	0	0	0	0	0	0	0	0	0	0	0	0	0	0	0	0	0	1	0	0	0	0
966	CD59	1	1	0	0.1	0	0	0	0	0	0	0	0	0	0	0	0	0	0	0	0	0	1	0	0	0	0
151531	UPP2	1	1	0	0.1	0	0	0	0	0	0	0	0	0	0	0	0	0	0	0	0	0	1	0	0	0	0
256158	HMCN2	1	1	0	0.1	0	0	0	0	0	0	0	0	0	0	0	0	0	0	0	0	0	1	0	0	0	0
2995	GYPC	1	1	0	0.1	0	0	0	0	0	0	0	0	0	0	0	0	0	0	0	0	0	1	0	0	0	0
3706	ITPKA	1	1	0	0.1	0	0	0	0	0	0	0	0	0	0	0	0	0	0	0	0	0	1	0	0	0	0
6883	TAF12	1	1	0	0.1	0	0	0	0	0	0	0	0	0	0	0	0	0	0	0	0	0	1	0	0	0	0
5334	PLCL1	1	1	0	0.1	0	0	0	0	0	0	0	0	0	0	0	0	0	0	0	0	0	1	0	0	0	0
147700	KLC3	1	1	0	0.1	0	0	0	0	0	0	0	0	0	0	0	0	0	0	0	0	0	1	0	0	0	0
84919	PPP1R15B	1	1	0	0.1	0	0	0	0	0	0	0	0	0	0	0	0	0	0	0	0	0	1	0	0	0	0
64746	ACBD3	1	1	0	0.1	0	0	0	0	0	0	0	0	0	0	0	0	0	0	0	0	0	1	0	0	0	0
26716	OR2H1	1	1	0	0.1	0	0	0	0	0	0	0	0	0	0	0	0	0	0	0	0	0	1	0	0	0	0
150759	LINC00342	1	1	0	0.1	0	0	0	0	0	0	0	0	0	0	0	0	0	0	0	0	0	1	0	0	0	0
5909	RAP1GAP	1	1	0	0.1	0	0	0	0	0	0	0	0	0	0	0	0	0	0	0	0	0	1	0	0	0	0
8887	TAX1BP1	1	1	0	0.1	0	0	0	0	0	0	0	0	0	0	0	0	0	0	0	0	0	1	0	0	0	0
440097	DBX2	1	1	0	0.1	0	0	0	0	0	0	0	0	0	0	0	0	0	0	0	0	0	1	0	0	0	0
4790	NFKB1	1	1	0	0.1	0	0	0	0	0	0	0	0	0	0	0	0	0	0	0	0	0	1	0	0	0	0
7106	TSPAN4	1	1	0	0.1	0	0	0	0	0	0	0	0	0	0	0	0	0	0	0	0	0	1	0	0	0	0
205327	C2orf69	1	1	0	0.1	0	0	0	0	0	0	0	0	0	0	0	0	0	0	0	0	0	1	0	0	0	0
8369	HIST1H4G	1	1	0	0.1	0	0	0	0	0	0	0	0	0	0	0	0	0	0	0	0	0	1	0	0	0	0
206412	C6orf163	1	1	0	0.1	0	0	0	0	0	0	0	0	0	0	0	0	0	0	0	0	0	1	0	0	0	0
9772	KIAA0195	1	1	0	0.1	0	0	0	0	0	0	0	0	0	0	0	0	0	0	0	0	0	1	0	0	0	0
374378	GALNT18	1	1	0	0.1	0	0	0	0	0	0	0	0	0	0	0	0	0	0	0	0	0	1	0	0	0	0
3163	HMOX2	1	1	0	0.1	0	0	0	0	0	0	0	0	0	0	0	0	0	0	0	0	0	1	0	0	0	0
92949	ADAMTSL1	1	1	0	0.1	0	0	0	0	0	0	0	0	0	0	0	0	0	0	0	0	0	1	0	0	0	0
9718	ECE2	1	1	0	0.1	0	0	0	0	0	0	0	0	0	0	0	0	0	0	0	0	0	1	0	0	0	0
5884	RAD17	1	1	0	0.1	0	0	0	0	0	0	0	0	0	0	0	0	0	0	0	0	0	1	0	0	0	0
91409	CCDC74B	1	1	0	0.1	0	0	0	0	0	0	0	0	0	0	0	0	0	0	0	0	0	1	0	0	0	0
125958	OR7D4	1	1	0	0.1	0	0	0	0	0	0	0	0	0	0	0	0	0	0	0	0	0	1	0	0	0	0
4723	NDUFV1	1	1	0	0.1	0	0	0	0	0	0	0	0	0	0	0	0	0	0	0	0	0	1	0	0	0	0
344752	AADACL2	1	1	0	0.1	0	0	0	0	0	0	0	0	0	0	0	0	0	0	0	0	0	1	0	0	0	0
286464	CHDC2	1	1	0	0.1	0	0	0	0	0	0	0	0	0	0	0	0	0	0	0	0	0	1	0	0	0	0
284440	LINC00663	1	1	0	0.1	0	0	0	0	0	0	0	0	0	0	0	0	0	0	0	0	0	1	0	0	0	0
59336	PRDM13	1	1	0	0.1	0	0	0	0	0	0	0	0	0	0	0	0	0	0	0	0	0	1	0	0	0	0
55814	BDP1	1	1	0	0.1	0	0	0	0	0	0	0	0	0	0	0	0	0	0	0	0	0	1	0	0	0	0
1180	CLCN1	1	1	0	0.1	0	0	0	0	0	0	0	0	0	0	0	0	0	0	0	0	0	1	0	0	0	0
139760	GPR119	1	1	0	0.1	0	0	0	0	0	0	0	0	0	0	0	0	0	0	0	0	0	1	0	0	0	0
4115	MAGEB4	1	1	0	0.1	0	0	0	0	0	0	0	0	0	0	0	0	0	0	0	0	0	1	0	0	0	0
1676	DFFA	1	1	0	0.1	0	0	0	0	0	0	0	0	0	0	0	0	0	0	0	0	0	1	0	0	0	0
8581	LY6D	1	1	0	0.1	0	0	0	0	0	0	0	0	0	0	0	0	0	0	0	0	0	1	0	0	0	0
3030	HADHA	1	1	0	0.1	0	0	0	0	0	0	0	0	0	0	0	0	0	0	0	0	0	1	0	0	0	0
1589	CYP21A2	1	1	0	0.1	0	0	0	0	0	0	0	0	0	0	0	0	0	0	0	0	0	1	0	0	0	0
5498	PPOX	1	1	0	0.1	0	0	0	0	0	0	0	0	0	0	0	0	0	0	0	0	0	1	0	0	0	0
92610	TIFA	1	1	0	0.1	0	0	0	0	0	0	0	0	0	0	0	0	0	0	0	0	0	1	0	0	0	0
136541	PRSS58	1	1	0	0.1	0	0	0	0	0	0	0	0	0	0	0	0	0	0	0	0	0	1	0	0	0	0
10766	TOB2	1	1	0	0.1	0	0	0	0	0	0	0	0	0	0	0	0	0	0	0	0	0	1	0	0	0	0
347541	MAGEB5	1	1	0	0.1	0	0	0	0	0	0	0	0	0	0	0	0	0	0	0	0	0	1	0	0	0	0
7515	XRCC1	1	1	0	0.1	0	0	0	0	0	0	0	0	0	0	0	0	0	0	0	0	0	1	0	0	0	0
65065	NBEAL1	1	1	0	0.1	0	0	0	0	0	0	0	0	0	0	0	0	0	0	0	0	0	1	0	0	0	0
283229	CRACR2B	1	1	0	0.1	0	0	0	0	0	0	0	0	0	0	0	0	0	0	0	0	0	1	0	0	0	0
388942	LOC388942	1	1	0	0.1	0	0	0	0	0	0	0	0	0	0	0	0	0	0	0	0	0	1	0	0	0	0
84326	C16orf13	1	1	0	0.1	0	0	0	0	0	0	0	0	0	0	0	0	0	0	0	0	0	1	0	0	0	0
5549	PRELP	1	1	0	0.1	0	0	0	0	0	0	0	0	0	0	0	0	0	0	0	0	0	1	0	0	0	0
51522	TMEM14C	1	1	0	0.1	0	0	0	0	0	0	0	0	0	0	0	0	0	0	0	0	0	1	0	0	0	0
2267	FGL1	1	1	0	0.1	0	0	0	0	0	0	0	0	0	0	0	0	0	0	0	0	0	1	0	0	0	0
136051	ZNF786	1	1	0	0.1	0	0	0	0	0	0	0	0	0	0	0	0	0	0	0	0	0	1	0	0	0	0
4214	MAP3K1	1	1	0	0.1	0	0	0	0	0	0	0	0	0	0	0	0	0	0	0	0	0	1	0	0	0	0
1615	DARS	1	1	0	0.1	0	0	0	0	0	0	0	0	0	0	0	0	0	0	0	0	0	1	0	0	0	0
9326	ZNHIT3	1	1	0	0.1	0	0	0	0	0	0	0	0	0	0	0	0	0	0	0	0	0	1	0	0	0	0
29844	TFPT	1	1	0	0.1	0	0	0	0	0	0	0	0	0	0	0	0	0	0	0	0	0	1	0	0	0	0
2638	GC	1	1	0	0.1	0	0	0	0	0	0	0	0	0	0	0	0	0	0	0	0	0	1	0	0	0	0
2572	GAD2	1	1	0	0.1	0	0	0	0	0	0	0	0	0	0	0	0	0	0	0	0	0	1	0	0	0	0
9810	RNF40	1	1	0	0.1	0	0	0	0	0	0	0	0	0	0	0	0	0	0	0	0	0	1	0	0	0	0
26054	SENP6	1	1	0	0.1	0	0	0	0	0	0	0	0	0	0	0	0	0	0	0	0	0	1	0	0	0	0
90557	CCDC74A	1	1	0	0.1	0	0	0	0	0	0	0	0	0	0	0	0	0	0	0	0	0	1	0	0	0	0
201243	C17orf74	1	1	0	0.1	0	0	0	0	0	0	0	0	0	0	0	0	0	0	0	0	0	1	0	0	0	0
283025	C10orf40	1	1	0	0.1	0	0	0	0	0	0	0	0	0	0	0	0	0	0	0	0	0	1	0	0	0	0
56147	PCDHA1	1	1	0	0.1	0	0	0	0	0	0	0	0	0	0	0	0	0	0	0	0	0	1	0	0	0	0
28513	CDH19	1	1	0	0.1	0	0	0	0	0	0	0	0	0	0	0	0	0	0	0	0	0	1	0	0	0	0
5138	PDE2A	1	1	0	0.1	0	0	0	0	0	0	0	0	0	0	0	0	0	0	0	0	0	1	0	0	0	0
5349	FXYD3	1	1	0	0.1	0	0	0	0	0	0	0	0	0	0	0	0	0	0	0	0	0	1	0	0	0	0
6237	RRAS	1	1	0	0.1	0	0	0	0	0	0	0	0	0	0	0	0	0	0	0	0	0	1	0	0	0	0
8773	SNAP23	1	1	0	0.1	0	0	0	0	0	0	0	0	0	0	0	0	0	0	0	0	0	1	0	0	0	0
9969	MED13	1	1	0	0.1	0	0	0	0	0	0	0	0	0	0	0	0	0	0	0	0	0	1	0	0	0	0
220906	WAC-AS1	1	1	0	0.1	0	0	0	0	0	0	0	0	0	0	0	0	0	0	0	0	0	1	0	0	0	0
50807	ASAP1	1	1	0	0.1	0	0	0	0	0	0	0	0	0	0	0	0	0	0	0	0	0	1	0	0	0	0
5309	PITX3	1	1	0	0.1	0	0	0	0	0	0	0	0	0	0	0	0	0	0	0	0	0	1	0	0	0	0
10946	SF3A3	1	1	0	0.1	0	0	0	0	0	0	0	0	0	0	0	0	0	0	0	0	0	1	0	0	0	0
220359	TIGD3	1	1	0	0.1	0	0	0	0	0	0	0	0	0	0	0	0	0	0	0	0	0	1	0	0	0	0
2140	EYA3	1	1	0	0.1	0	0	0	0	0	0	0	0	0	0	0	0	0	0	0	0	0	1	0	0	0	0
25909	AHCTF1	1	1	0	0.1	0	0	0	0	0	0	0	0	0	0	0	0	0	0	0	0	0	1	0	0	0	0
55163	PNPO	1	1	0	0.1	0	0	0	0	0	0	0	0	0	0	0	0	0	0	0	0	0	1	0	0	0	0
7356	SCGB1A1	1	1	0	0.1	0	0	0	0	0	0	0	0	0	0	0	0	0	0	0	0	0	1	0	0	0	0
7918	GPANK1	1	1	0	0.1	0	0	0	0	0	0	0	0	0	0	0	0	0	0	0	0	0	1	0	0	0	0
283440	LOC283440	1	1	0	0.1	0	0	0	0	0	0	0	0	0	0	0	0	0	0	0	0	0	1	0	0	0	0
5723	PSPH	1	1	0	0.1	0	0	0	0	0	0	0	0	0	0	0	0	0	0	0	0	0	1	0	0	0	0
611	OPN1SW	1	1	0	0.1	0	0	0	0	0	0	0	0	0	0	0	0	0	0	0	0	0	1	0	0	0	0
1967	EIF2B1	1	1	0	0.1	0	0	0	0	0	0	0	0	0	0	0	0	0	0	0	0	0	1	0	0	0	0
284382	ACTL9	1	1	0	0.1	0	0	0	0	0	0	0	0	0	0	0	0	0	0	0	0	0	1	0	0	0	0
50939	IMPG2	1	1	0	0.1	0	0	0	0	0	0	0	0	0	0	0	0	0	0	0	0	0	1	0	0	0	0
2568	GABRP	1	1	0	0.1	0	0	0	0	0	0	0	0	0	0	0	0	0	0	0	0	0	1	0	0	0	0
9610	RIN1	1	1	0	0.1	0	0	0	0	0	0	0	0	0	0	0	0	0	0	0	0	0	1	0	0	0	0
64805	P2RY12	1	1	0	0.1	0	0	0	0	0	0	0	0	0	0	0	0	0	0	0	0	0	1	0	0	0	0
5018	OXA1L	1	1	0	0.1	0	0	0	0	0	0	0	0	0	0	0	0	0	0	0	0	0	1	0	0	0	0
55664	CDC37L1	1	1	0	0.1	0	0	0	0	0	0	0	0	0	0	0	0	0	0	0	0	0	1	0	0	0	0
6940	ZNF354A	1	1	0	0.1	0	0	0	0	0	0	0	0	0	0	0	0	0	0	0	0	0	1	0	0	0	0
404636	FAM45A	1	1	0	0.1	0	0	0	0	0	0	0	0	0	0	0	0	0	0	0	0	0	1	0	0	0	0
2705	GJB1	1	1	0	0.1	0	0	0	0	0	0	0	0	0	0	0	0	0	0	0	0	0	1	0	0	0	0
[truncated: 1,614 more rows]

## Sheet: S3
Supplementary Table S3 – Mouse stemness genes ranked list.
Ranked list of all mouse genes sorted according to their occurrence ("Score") in individual stemness signatures in mouse.
Genes (rows) which also belong to mouse Integrated Stemness Signature (ISS) are in grey.
When a gene (row) is present in one individual stemness signature (column) cell number is "1", otherwise "0"
							Individual Stemness Signatures
						Potency class	Pluripotent	Pluripotent	Pluripotent	Pluripotent	Multipotent	Multipotent	Multipotent	Multipotent	Multipotent	Multipotent	Multipotent	Multipotent	Multipotent	Multipotent	Unipotent	Pluripotent	Pluripotent	Pluripotent	Pluripotent	Multipotent	Pluripotent
						Evidence base	Expression	Expression	Expression	Expression	Expression	Expression	Expression	Expression	Expression	Expression	Expression	Expression	Expression	Expression	Expression	RNAi	RNAi	RNAi	RNAi	Literature	Literature
							Mm_ESC_Fortunel	Mm_ESC_Gaspar	Mm_ESC_Ivanova	Mm_ESC_Ramalho	Mm_HSC_Ivanova	Mm_HSC_Ramalho	Mm_ISC_Munoz	Mm_NSC_D.Amour	Mm_NSC_Fortunel	Mm_NSC_Ivanova	Mm_NSC_Parker	Mm_NSC_Ramalho	Mm_RPC_Fortunel	Mm_SC_Wong	Mm_SSC_Kokkinaki	Mm_ESC_Ding	Mm_ESC_Hu	Mm_ESC_Wang	Mm_ESC_Yang	HSC.Explorer	PluriNetWork
Total number of genes of each individual stemness signature							1108	148	967	1177	772	1269	483	135	1141	840	982	1577	1475	735	99	210	147	120	129	279	274
Number of genes of each individual stemness signature that are also in mouse ISS							80	7	81	97	34	64	24	7	86	61	29	96	95	26	3	6	7	5	4	29	30
Gene Description
Gene_id	Gene_symbol	Overall score	Pluripotency score	Multipotency score	Normalised Pluripotency score	Normalised Multipotency score
13619	Phc1	13	5	8	0.555556	0.727273	1	1	1	1	1	1	1	0	1	1	0	0	1	1	0	0	0	0	0	1	1
21849	Trim28	11	5	6	0.555556	0.545455	1	0	1	1	1	0	1	0	1	1	0	1	1	0	0	0	1	0	0	0	1
12567	Cdk4	10	3	7	0.333333	0.636364	0	0	1	1	1	0	1	0	1	1	0	1	1	0	0	0	0	1	0	1	0
13138	Dag1	10	2	8	0.222222	0.727273	1	0	1	0	1	1	0	0	1	1	1	1	1	0	0	0	0	0	0	1	0
21677	Tead2	10	3	7	0.333333	0.636364	1	0	1	1	0	1	1	0	1	1	1	1	1	0	0	0	0	0	0	0	0
19038	Ppic	10	2	8	0.222222	0.727273	0	0	1	1	1	1	0	0	1	1	1	1	1	1	0	0	0	0	0	0	0
12443	Ccnd1	9	2	7	0.222222	0.636364	0	0	0	1	0	1	0	0	1	0	1	1	1	1	0	0	0	0	0	1	1
12577	Cdkn1c	9	3	6	0.333333	0.545455	1	0	1	1	0	1	0	0	1	1	0	0	1	1	0	0	0	0	0	1	0
15213	Hey1	9	2	7	0.222222	0.636364	1	0	0	1	1	1	0	1	0	1	0	1	1	0	0	0	0	0	0	1	0
18128	Notch1	9	1	8	0.111111	0.727273	0	0	0	0	0	1	1	1	1	0	1	1	1	0	0	0	0	0	0	1	1
12822	Col18a1	9	3	5	0.333333	0.454545	1	0	1	1	1	0	0	0	1	0	0	1	1	1	1	0	0	0	0	0	0
18109	Mycn	9	4	5	0.444444	0.454545	1	0	1	1	1	1	0	0	1	0	0	0	1	1	0	0	0	0	0	0	1
56496	Tspan6	9	1	8	0.111111	0.727273	0	0	1	0	1	0	0	1	1	1	1	1	1	1	0	0	0	0	0	0	0
27055	Fkbp9	9	2	7	0.222222	0.636364	0	0	1	1	0	1	0	0	1	1	1	1	1	1	0	0	0	0	0	0	0
12111	Bgn	8	2	5	0.222222	0.454545	0	0	1	1	0	1	0	0	1	0	1	0	0	1	1	0	0	0	0	1	0
12826	Col4a1	8	1	7	0.111111	0.636364	0	0	1	0	1	1	0	0	0	1	1	0	1	1	0	0	0	0	0	1	0
13685	Eif4ebp1	8	3	5	0.333333	0.454545	1	0	1	1	0	1	0	0	1	0	0	1	1	0	0	0	0	0	0	1	0
17869	Myc	8	2	6	0.222222	0.545455	0	0	0	0	0	1	1	0	1	0	0	1	1	0	0	0	0	0	1	1	1
19821	Rnf2	8	4	4	0.444444	0.363636	0	0	0	1	0	0	1	0	0	0	0	1	1	0	0	1	1	0	0	1	1
21872	Tjp1	8	3	5	0.333333	0.454545	1	0	1	1	0	1	0	0	1	1	0	1	0	0	0	0	0	0	0	1	0
21923	Tnc	8	2	6	0.222222	0.545455	0	0	1	1	0	0	0	0	1	1	1	1	0	1	0	0	0	0	0	1	0
22401	Zmat3	8	3	5	0.333333	0.454545	1	0	1	1	0	1	0	0	1	1	0	1	0	0	0	0	0	0	0	1	0
66317	Wdr61	8	6	2	0.666667	0.181818	1	0	1	1	0	0	0	0	0	1	0	1	0	0	0	1	1	0	0	0	1
20674	Sox2	8	4	4	0.444444	0.363636	0	1	0	0	0	0	0	0	1	0	1	1	1	0	0	1	1	0	0	0	1
11692	Gfer	8	3	5	0.333333	0.454545	1	0	1	1	0	1	0	0	1	1	0	1	1	0	0	0	0	0	0	0	0
11792	Apex1	8	3	5	0.333333	0.454545	1	0	1	1	0	0	1	0	1	1	0	1	1	0	0	0	0	0	0	0	0
13435	Dnmt3a	8	4	4	0.444444	0.363636	1	0	1	1	1	0	0	0	0	0	1	1	1	0	0	0	0	0	0	0	1
13990	Smarcad1	8	4	4	0.444444	0.363636	1	0	1	1	0	1	0	0	1	0	0	1	1	0	0	0	0	0	0	0	1
16785	Rpsa	8	4	4	0.444444	0.363636	1	0	1	1	0	0	0	0	1	1	0	1	1	0	0	0	0	0	1	0	0
17215	Mcm3	8	3	5	0.333333	0.454545	1	0	1	1	1	0	1	0	1	0	0	1	1	0	0	0	0	0	0	0	0
17685	Msh2	8	3	5	0.333333	0.454545	1	0	1	1	1	1	1	0	0	0	0	1	1	0	0	0	0	0	0	0	0
18005	Nek2	8	4	4	0.444444	0.363636	1	0	1	1	0	0	0	0	1	1	0	1	1	0	0	0	0	1	0	0	0
22271	Upp1	8	3	5	0.333333	0.454545	1	0	1	1	1	1	0	0	1	1	0	1	0	0	0	0	0	0	0	0	0
22592	Ercc5	8	4	4	0.444444	0.363636	1	0	1	1	0	1	0	0	1	1	0	1	0	0	0	0	0	0	0	0	1
22697	Zscan21	8	2	6	0.222222	0.545455	1	0	1	0	1	1	0	0	1	1	0	1	1	0	0	0	0	0	0	0	0
23918	Impdh2	8	2	6	0.222222	0.545455	1	0	1	0	0	0	1	0	1	1	1	1	1	0	0	0	0	0	0	0	0
66192	Lage3	8	3	5	0.333333	0.454545	1	0	1	1	1	0	0	0	1	1	0	1	1	0	0	0	0	0	0	0	0
66422	Dctpp1	8	3	5	0.333333	0.454545	1	0	1	1	0	1	0	0	1	1	0	1	1	0	0	0	0	0	0	0	0
67036	Mrpl45	8	3	5	0.333333	0.454545	1	0	1	1	1	1	0	0	0	1	0	1	1	0	0	0	0	0	0	0	0
68045	2700060E02Rik	8	3	5	0.333333	0.454545	1	0	1	1	0	0	0	0	1	1	1	1	1	0	0	0	0	0	0	0	0
12406	Serpinh1	8	1	7	0.111111	0.636364	0	0	1	0	0	1	0	0	1	1	1	1	1	1	0	0	0	0	0	0	0
14062	F2r	8	2	6	0.222222	0.545455	0	0	1	1	0	1	0	0	1	1	0	1	1	1	0	0	0	0	0	0	0
12028	Bax	7	3	4	0.333333	0.363636	1	0	1	1	0	0	0	0	0	1	0	1	1	0	0	0	0	0	0	1	0
12159	Bmp4	7	3	4	0.333333	0.363636	1	0	1	0	0	1	0	0	0	1	0	1	0	0	0	0	0	0	0	1	1
12534	Cdk1	7	3	4	0.333333	0.363636	1	0	0	1	0	0	0	0	1	0	0	1	1	0	0	0	0	1	0	1	0
12575	Cdkn1a	7	2	5	0.222222	0.454545	0	0	0	1	0	1	0	0	1	0	0	1	0	1	0	0	0	0	0	1	1
13388	Dll1	7	0	7	0	0.636364	0	0	0	0	1	0	0	1	1	1	0	1	1	0	0	0	0	0	0	1	0
15510	Hspd1	7	2	5	0.222222	0.454545	0	0	1	1	0	0	0	0	1	1	0	1	1	0	0	0	0	0	0	1	0
15901	Id1	7	2	5	0.222222	0.454545	1	0	0	0	0	1	0	0	0	1	0	0	1	1	0	0	0	0	0	1	1
16412	Itgb1	7	2	5	0.222222	0.454545	0	0	0	1	0	1	0	0	1	0	0	1	1	0	0	0	0	0	0	1	1
17131	Smad7	7	3	4	0.333333	0.363636	0	0	1	1	1	1	0	0	0	0	0	0	0	1	0	0	0	0	0	1	1
18514	Pbx1	7	1	6	0.111111	0.545455	0	0	0	1	0	0	1	0	1	0	0	1	1	1	0	0	0	0	0	1	0
20466	Sin3a	7	3	4	0.333333	0.363636	1	0	0	1	0	1	0	0	1	0	0	0	1	0	0	0	0	0	0	1	1
22059	Trp53	7	4	3	0.444444	0.272727	1	0	1	1	0	0	0	0	0	0	0	1	1	0	0	0	0	0	0	1	1
50883	Chek2	7	2	5	0.222222	0.454545	1	0	0	1	0	1	1	0	1	0	0	0	1	0	0	0	0	0	0	1	0
268697	Ccnb1	7	2	5	0.222222	0.454545	1	0	0	1	0	0	1	0	1	0	0	1	1	0	0	0	0	0	0	1	0
18999	Pou5f1	7	7	0	0.777778	0	1	1	1	1	0	0	0	0	0	0	0	0	0	0	0	1	1	0	0	0	1
17357	Marcksl1	7	2	5	0.222222	0.454545	1	0	0	0	0	0	1	0	1	0	1	0	1	1	0	1	0	0	0	0	0
22083	Ctr9	7	5	2	0.555556	0.181818	1	0	0	0	0	0	0	0	0	0	0	1	1	0	0	1	1	0	1	0	1
11614	Nr0b1	7	5	2	0.555556	0.181818	1	1	1	1	1	0	0	0	0	0	0	0	1	0	0	0	0	0	0	0	1
12649	Chek1	7	3	4	0.333333	0.363636	1	0	1	1	0	0	1	0	1	0	0	1	1	0	0	0	0	0	0	0	0
13445	Cdk2ap1	7	3	4	0.333333	0.363636	1	0	0	1	0	1	0	0	1	0	0	1	1	0	0	0	0	0	0	0	1
14388	Gab1	7	3	4	0.333333	0.363636	1	0	0	1	0	1	0	0	1	0	1	1	0	0	0	0	0	0	0	0	1
14450	Gart	7	3	4	0.333333	0.363636	1	0	1	1	1	0	0	0	1	0	0	1	1	0	0	0	0	0	0	0	0
14860	Gsta4	7	3	3	0.333333	0.272727	1	1	0	1	0	1	0	0	0	0	0	1	0	1	1	0	0	0	0	0	0
15201	Hells	7	4	3	0.444444	0.272727	1	0	1	1	0	0	1	0	0	0	0	1	1	0	0	0	0	0	0	0	1
16008	Igfbp2	7	3	4	0.333333	0.363636	1	0	1	1	0	0	0	0	1	1	0	1	1	0	0	0	0	0	0	0	0
16403	Itga6	7	2	5	0.222222	0.454545	1	0	0	1	0	1	0	0	1	0	1	1	1	0	0	0	0	0	0	0	0
16709	Ktn1	7	3	4	0.333333	0.363636	1	0	1	1	0	1	0	0	0	1	0	1	0	1	0	0	0	0	0	0	0
17216	Mcm2	7	3	4	0.333333	0.363636	1	0	1	1	0	0	1	0	1	0	0	1	1	0	0	0	0	0	0	0	0
17217	Mcm4	7	3	4	0.333333	0.363636	1	0	1	1	0	0	1	0	1	0	0	1	1	0	0	0	0	0	0	0	0
17865	Mybl2	7	5	2	0.555556	0.181818	1	1	1	1	0	0	0	0	1	0	0	0	1	0	0	0	0	0	0	0	1
17876	Myef2	7	3	4	0.333333	0.363636	1	0	1	1	0	0	0	0	1	1	0	1	1	0	0	0	0	0	0	0	0
18817	Plk1	7	4	3	0.444444	0.272727	1	0	1	1	0	0	0	0	1	0	0	1	1	0	0	0	0	1	0	0	0
19826	Rnps1	7	3	4	0.333333	0.363636	1	0	1	1	0	0	0	0	1	1	0	1	1	0	0	0	0	0	0	0	0
20016	Polr1c	7	3	4	0.333333	0.363636	1	0	1	1	0	0	0	0	1	1	0	1	1	0	0	0	0	0	0	0	0
20383	Srsf3	7	3	4	0.333333	0.363636	1	0	1	1	0	1	0	0	1	0	0	1	1	0	0	0	0	0	0	0	0
20624	Eftud2	7	3	4	0.333333	0.363636	1	0	1	1	0	0	0	0	1	1	0	1	1	0	0	0	0	0	0	0	0
21915	Dtymk	7	3	4	0.333333	0.363636	1	0	0	1	0	1	0	0	1	0	0	1	1	0	0	0	0	1	0	0	0
22137	Ttk	7	3	4	0.333333	0.363636	1	0	1	1	0	0	1	0	1	0	0	1	1	0	0	0	0	0	0	0	0
22381	Wbp5	7	2	5	0.222222	0.454545	1	0	0	1	0	1	0	0	0	1	0	1	1	1	0	0	0	0	0	0	0
22764	Zfx	7	3	4	0.333333	0.363636	1	0	0	1	0	1	0	0	1	0	0	1	1	0	0	0	0	0	0	0	1
24070	Mpdu1	7	3	4	0.333333	0.363636	1	0	1	1	0	1	0	0	1	1	0	1	0	0	0	0	0	0	0	0	0
27428	Shroom3	7	3	4	0.333333	0.363636	1	0	1	1	1	1	0	0	0	1	0	0	1	0	0	0	0	0	0	0	0
30939	Pttg1	7	3	4	0.333333	0.363636	1	0	1	1	0	1	0	0	0	1	1	0	1	0	0	0	0	0	0	0	0
55944	Eif3d	7	2	5	0.222222	0.454545	1	0	1	0	1	1	0	0	1	1	0	0	1	0	0	0	0	0	0	0	0
56515	Rnf138	7	3	4	0.333333	0.363636	1	1	0	1	0	1	0	0	1	0	0	1	1	0	0	0	0	0	0	0	0
56520	Nme4	7	3	4	0.333333	0.363636	1	0	1	1	0	0	1	0	1	0	0	1	1	0	0	0	0	0	0	0	0
66249	Pno1	7	4	3	0.444444	0.272727	1	0	1	1	0	0	0	0	0	1	0	1	1	0	0	0	0	0	1	0	0
66942	Ddx18	7	3	4	0.333333	0.363636	1	0	1	1	1	0	0	0	0	1	0	1	1	0	0	0	0	0	0	0	0
66973	Mrps18b	7	3	4	0.333333	0.363636	1	0	1	1	0	0	0	0	1	1	0	1	1	0	0	0	0	0	0	0	0
67177	Cdt1	7	3	4	0.333333	0.363636	1	0	1	1	1	0	0	0	1	0	0	1	1	0	0	0	0	0	0	0	0
67701	Wfdc2	7	3	4	0.333333	0.363636	1	0	1	1	0	1	0	1	1	0	0	0	1	0	0	0	0	0	0	0	0
67895	Ppa1	7	3	4	0.333333	0.363636	1	0	1	1	1	1	0	0	0	1	0	1	0	0	0	0	0	0	0	0	0
67936	Wdr55	7	2	5	0.222222	0.454545	1	0	0	1	0	1	1	0	1	0	0	1	1	0	0	0	0	0	0	0	0
69719	Cad	7	3	4	0.333333	0.363636	1	0	0	1	0	1	0	0	1	0	0	1	1	0	0	0	0	0	0	0	1
69740	Dph5	7	3	4	0.333333	0.363636	1	0	1	1	1	1	0	0	0	0	0	1	1	0	0	0	0	0	0	0	0
70356	St13	7	3	4	0.333333	0.363636	1	0	1	1	0	0	0	0	1	1	0	1	1	0	0	0	0	0	0	0	0
74747	Ddit4	7	2	5	0.222222	0.454545	1	0	0	1	1	1	0	0	1	1	0	0	0	1	0	0	0	0	0	0	0
75590	Dusp9	7	3	4	0.333333	0.363636	1	0	1	1	1	1	0	0	0	0	0	1	1	0	0	0	0	0	0	0	0
23986	Eci2	7	1	6	0.111111	0.545455	0	0	0	0	0	1	0	0	1	1	1	1	1	0	0	0	1	0	0	0	0
18103	Nme2	7	3	4	0.333333	0.363636	0	0	1	1	0	0	0	0	1	1	0	1	1	0	0	0	0	0	0	0	1
18764	Pkd2	7	2	5	0.222222	0.454545	0	0	1	1	1	1	0	0	0	1	0	1	0	1	0	0	0	0	0	0	0
67763	Prpsap1	7	2	5	0.222222	0.454545	0	0	1	1	1	1	0	0	1	1	0	1	0	0	0	0	0	0	0	0	0
19672	Rcn1	7	2	5	0.222222	0.454545	0	0	1	1	0	1	0	0	0	1	1	1	1	0	0	0	0	0	0	0	0
67996	Srsf6	7	2	5	0.222222	0.454545	0	0	1	1	0	1	0	0	1	0	1	1	1	0	0	0	0	0	0	0	0
56693	Crtap	7	2	5	0.222222	0.454545	0	0	1	1	0	1	0	0	1	0	1	1	1	0	0	0	0	0	0	0	0
21376	Tbrg1	7	2	5	0.222222	0.454545	0	0	1	1	0	1	0	0	1	1	0	1	1	0	0	0	0	0	0	0	0
67788	Sfr1	7	2	5	0.222222	0.454545	0	0	1	1	1	0	0	0	1	0	1	1	1	0	0	0	0	0	0	0	0
27059	Sh3d19	7	2	5	0.222222	0.454545	0	0	1	1	0	1	0	0	1	1	1	1	0	0	0	0	0	0	0	0	0
17125	Smad1	7	2	5	0.222222	0.454545	0	0	0	1	0	1	0	0	0	0	1	1	1	1	0	0	0	0	0	0	1
20675	Sox3	7	1	6	0.111111	0.545455	0	0	0	1	1	0	0	1	1	1	0	1	1	0	0	0	0	0	0	0	0
66059	Krtcap2	7	1	6	0.111111	0.545455	0	0	0	1	1	0	0	0	1	1	1	1	1	0	0	0	0	0	0	0	0
26897	Acot1	7	0	7	0	0.636364	0	0	0	0	0	1	1	0	1	0	1	1	1	1	0	0	0	0	0	0	0
57265	Fzd2	7	0	7	0	0.636364	0	0	0	0	0	0	1	1	1	1	1	0	1	1	0	0	0	0	0	0	0
11949	Atp5c1	6	1	5	0.111111	0.454545	0	0	1	0	0	0	0	0	1	1	0	1	1	0	0	0	0	0	0	1	0
12449	Ccnf	6	2	4	0.222222	0.363636	1	0	0	1	0	0	0	0	1	0	0	1	1	0	0	0	0	0	0	1	0
12530	Cdc25a	6	2	4	0.222222	0.363636	1	0	0	1	0	0	0	0	1	0	0	1	1	0	0	0	0	0	0	1	0
14056	Ezh2	6	2	4	0.222222	0.363636	1	0	0	0	0	0	0	0	1	0	0	1	1	0	0	0	0	0	0	1	1
15894	Icam1	6	2	4	0.222222	0.363636	1	0	0	0	0	1	0	0	1	0	0	0	0	1	0	0	0	0	0	1	1
17126	Smad2	6	2	4	0.222222	0.363636	0	0	0	1	0	1	0	0	0	0	0	1	1	0	0	0	0	0	0	1	1
17999	Nedd4	6	0	6	0	0.545455	0	0	0	0	0	1	0	0	1	0	1	1	1	0	0	0	0	0	0	1	0
20525	Slc2a1	6	3	3	0.333333	0.272727	1	0	1	1	0	0	0	0	0	1	0	0	1	0	0	0	0	0	0	1	0
20683	Sp1	6	2	4	0.222222	0.363636	1	0	0	0	0	0	0	0	1	0	0	1	1	0	0	0	0	0	0	1	1
71950	Nanog	6	5	1	0.555556	0.0909091	1	1	1	1	0	0	0	0	0	0	0	0	0	0	0	0	0	0	0	1	1
68240	Rpa3	6	3	3	0.333333	0.272727	1	0	0	1	0	0	0	0	1	0	0	1	1	0	0	1	0	0	0	0	0
16009	Igfbp3	6	2	4	0.222222	0.363636	0	0	0	1	0	0	0	0	1	1	0	1	0	1	0	1	0	0	0	0	0
11532	Adh5	6	3	3	0.333333	0.272727	1	0	1	1	0	0	0	0	0	1	0	1	1	0	0	0	0	0	0	0	0
12189	Brca1	6	3	3	0.333333	0.272727	1	0	0	1	0	0	0	0	1	0	0	1	1	0	0	0	0	0	0	0	1
12190	Brca2	6	2	4	0.222222	0.363636	1	0	0	1	0	1	1	0	1	0	0	0	1	0	0	0	0	0	0	0	0
12235	Bub1	6	3	3	0.333333	0.272727	1	0	1	1	0	0	0	0	1	0	0	1	1	0	0	0	0	0	0	0	0
12237	Bub3	6	3	3	0.333333	0.272727	1	0	1	1	0	0	0	0	1	0	0	1	1	0	0	0	0	0	0	0	0
12316	Aspm	6	2	4	0.222222	0.363636	1	0	0	1	0	0	1	0	1	0	0	1	1	0	0	0	0	0	0	0	0
12412	Cbx1	6	3	3	0.333333	0.272727	1	0	0	1	1	0	0	0	0	0	0	1	1	0	0	0	1	0	0	0	0
12457	Ccrn4l	6	4	2	0.444444	0.181818	1	0	1	1	0	0	0	0	0	1	0	1	0	0	0	0	1	0	0	0	0
12532	Cdc25c	6	3	3	0.333333	0.272727	1	0	0	1	0	0	0	0	1	0	0	1	1	0	0	0	0	1	0	0	0
12607	Cebpz	6	3	3	0.333333	0.272727	1	0	1	1	1	0	0	0	0	0	0	1	1	0	0	0	0	0	0	0	0
12648	Chd1	6	2	4	0.222222	0.363636	1	0	0	1	0	1	0	0	1	0	0	1	1	0	0	0	0	0	0	0	0
13008	Csrp2	6	3	3	0.333333	0.272727	1	0	1	1	0	1	0	0	1	0	0	0	1	0	0	0	0	0	0	0	0
13669	Eif3a	6	3	3	0.333333	0.272727	1	0	1	1	0	0	0	0	1	0	0	1	1	0	0	0	0	0	0	0	0
13824	Epb4.1l4a	6	4	2	0.444444	0.181818	1	1	1	1	0	0	0	0	0	1	0	1	0	0	0	0	0	0	0	0	0
14105	Srsf10	6	3	3	0.333333	0.272727	1	0	1	1	0	0	0	0	1	0	0	1	1	0	0	0	0	0	0	0	0
14245	Lpin1	6	1	5	0.111111	0.454545	1	0	0	0	0	1	0	0	1	0	1	1	0	1	0	0	0	0	0	0	0
14712	Gnpat	6	3	3	0.333333	0.272727	1	0	1	1	0	0	0	0	1	1	0	1	0	0	0	0	0	0	0	0	0
14885	Gtf2h4	6	3	3	0.333333	0.272727	1	0	1	1	0	0	0	0	0	1	0	1	1	0	0	0	0	0	0	0	0
15078	H3f3a	6	2	4	0.222222	0.363636	1	0	0	0	1	0	0	0	1	0	0	1	1	0	0	0	0	0	0	0	1
15277	Hk2	6	2	4	0.222222	0.363636	1	0	0	1	0	1	1	0	1	0	0	0	1	0	0	0	0	0	0	0	0
15925	Ide	6	3	3	0.333333	0.272727	1	0	1	1	0	0	0	0	1	1	0	1	0	0	0	0	0	0	0	0	0
16647	Kpna2	6	3	3	0.333333	0.272727	1	0	0	1	0	0	0	0	1	0	0	1	1	0	0	0	0	0	0	0	1
17218	Mcm5	6	2	4	0.222222	0.363636	1	0	1	0	0	0	1	0	1	0	0	1	1	0	0	0	0	0	0	0	0
17246	Mdm2	6	4	2	0.444444	0.181818	1	0	1	1	0	1	0	0	1	0	0	0	0	0	0	0	0	0	0	0	1
17294	Mest	6	2	4	0.222222	0.363636	1	0	0	1	0	0	0	0	1	0	1	1	1	0	0	0	0	0	0	0	0
17344	Pias2	6	4	2	0.444444	0.181818	1	0	1	1	0	0	0	0	0	1	0	1	0	0	0	0	0	0	0	0	1
17463	Psmd7	6	3	3	0.333333	0.272727	1	0	1	1	0	0	0	0	1	0	0	1	1	0	0	0	0	0	0	0	0
17909	Myo10	6	2	4	0.222222	0.363636	1	0	1	0	1	0	0	0	1	1	0	1	0	0	0	0	0	0	0	0	0
18263	Odc1	6	3	3	0.333333	0.272727	1	0	1	1	0	1	0	0	1	0	0	0	1	0	0	0	0	0	0	0	0
18432	Mybbp1a	6	3	3	0.333333	0.272727	1	0	1	1	1	1	0	0	0	0	0	0	1	0	0	0	0	0	0	0	0
18477	Prdx1	6	3	3	0.333333	0.272727	1	0	1	1	1	0	0	0	0	0	0	1	1	0	0	0	0	0	0	0	0
18518	Igbp1	6	1	5	0.111111	0.454545	1	0	0	0	1	1	0	0	0	1	1	0	1	0	0	0	0	0	0	0	0
18974	Pole2	6	3	3	0.333333	0.272727	1	0	1	1	0	0	0	0	1	0	0	1	1	0	0	0	0	0	0	0	0
19348	Kif20a	6	2	4	0.222222	0.363636	1	0	0	1	0	0	1	0	1	0	0	1	1	0	0	0	0	0	0	0	0
19360	Rad50	6	3	3	0.333333	0.272727	1	0	1	1	0	0	1	0	1	0	0	0	1	0	0	0	0	0	0	0	0
19656	Rbmxl1	6	3	3	0.333333	0.272727	1	0	1	1	0	0	0	0	0	1	0	1	1	0	0	0	0	0	0	0	0
19687	Rfc1	6	3	3	0.333333	0.272727	1	0	1	1	0	0	0	0	1	0	0	1	1	0	0	0	0	0	0	0	0
19822	Rnf4	6	2	4	0.222222	0.363636	1	0	0	1	0	1	0	0	1	0	0	1	1	0	0	0	0	0	0	0	0
20135	Rrm2	6	3	3	0.333333	0.272727	1	0	1	1	0	0	0	0	1	0	0	1	1	0	0	0	0	0	0	0	0
20174	Ruvbl2	6	2	4	0.222222	0.363636	1	0	1	0	0	0	0	0	1	1	0	1	1	0	0	0	0	0	0	0	0
20662	Sos1	6	3	3	0.333333	0.272727	1	0	0	1	0	1	0	0	1	0	0	0	1	0	0	0	0	0	0	0	1
20810	Srm	6	3	3	0.333333	0.272727	1	0	1	1	0	0	0	0	1	1	0	1	0	0	0	0	0	0	0	0	0
20878	Aurka	6	3	3	0.333333	0.272727	1	0	0	1	0	0	0	0	1	0	0	1	1	0	0	0	0	1	0	0	0
21815	Tgif1	6	2	4	0.222222	0.363636	1	0	0	1	0	1	1	0	1	0	0	0	1	0	0	0	0	0	0	0	0
21847	Klf10	6	1	5	0.111111	0.454545	1	0	0	0	1	1	0	0	1	0	0	1	0	1	0	0	0	0	0	0	0
22121	Rpl13a	6	2	4	0.222222	0.363636	1	0	0	1	0	0	0	0	1	0	1	1	1	0	0	0	0	0	0	0	0
22256	Ung	6	3	3	0.333333	0.272727	1	0	1	1	0	0	1	0	0	0	0	1	1	0	0	0	0	0	0	0	0
22594	Xrcc1	6	1	5	0.111111	0.454545	1	0	0	0	1	1	0	0	1	0	0	1	1	0	0	0	0	0	0	0	0
22596	Xrcc5	6	2	4	0.222222	0.363636	1	0	0	1	0	1	1	0	0	0	0	1	1	0	0	0	0	0	0	0	0
22631	Ywhaz	6	2	4	0.222222	0.363636	1	0	1	0	1	0	0	0	0	1	0	1	1	0	0	0	0	0	0	0	0
23874	Farsb	6	3	3	0.333333	0.272727	1	0	1	1	0	0	0	0	0	1	0	1	1	0	0	0	0	0	0	0	0
24015	Abce1	6	3	3	0.333333	0.272727	1	0	1	1	1	0	0	0	0	0	0	1	1	0	0	0	0	0	0	0	0
26572	Cops3	6	3	3	0.333333	0.272727	1	0	1	1	0	0	0	0	0	1	0	1	1	0	0	0	0	0	0	0	0
26891	Cops4	6	3	3	0.333333	0.272727	1	0	1	1	0	1	0	0	0	1	0	1	0	0	0	0	0	0	0	0	0
27275	Nufip1	6	3	3	0.333333	0.272727	1	0	1	1	1	0	0	0	0	1	0	1	0	0	0	0	0	0	0	0	0
28113	Tinf2	6	2	4	0.222222	0.363636	1	0	1	0	0	1	0	0	1	1	0	1	0	0	0	0	0	0	0	0	0
30877	Gnl3	6	3	3	0.333333	0.272727	1	0	0	1	0	0	0	0	1	0	0	1	1	0	0	0	0	0	1	0	0
53605	Nap1l1	6	2	4	0.222222	0.363636	1	0	0	1	0	0	1	0	1	0	0	1	1	0	0	0	0	0	0	0	0
54723	Tfip11	6	2	4	0.222222	0.363636	1	0	0	1	0	1	0	0	1	0	0	1	1	0	0	0	0	0	0	0	0
55989	Nop58	6	2	4	0.222222	0.363636	1	0	0	1	0	1	0	0	1	0	0	1	1	0	0	0	0	0	0	0	0
56428	Mtch2	6	4	2	0.444444	0.181818	1	0	1	1	0	0	0	0	0	0	0	1	1	0	0	0	1	0	0	0	0
56505	Ruvbl1	6	3	3	0.333333	0.272727	1	0	1	1	0	0	0	0	0	1	0	1	1	0	0	0	0	0	0	0	0
59028	Rcl1	6	3	3	0.333333	0.272727	1	0	1	1	0	1	0	0	1	0	0	1	0	0	0	0	0	0	0	0	0
64424	Polr1e	6	2	4	0.222222	0.363636	1	0	0	1	0	0	1	0	1	0	0	1	1	0	0	0	0	0	0	0	0
66229	Rpl7l1	6	2	4	0.222222	0.363636	1	0	0	1	0	1	0	0	1	0	0	1	1	0	0	0	0	0	0	0	0
66256	Ssr2	6	2	4	0.222222	0.363636	1	0	1	0	0	0	0	0	1	1	0	1	1	0	0	0	0	0	0	0	0
66580	Esf1	6	3	3	0.333333	0.272727	1	0	1	1	0	1	0	0	0	0	0	1	1	0	0	0	0	0	0	0	0
66997	Psmd12	6	3	3	0.333333	0.272727	1	0	1	1	0	1	0	0	0	0	0	1	1	0	0	0	0	0	0	0	0
67196	Ube2t	6	2	4	0.222222	0.363636	1	0	0	1	0	1	0	0	1	0	0	1	1	0	0	0	0	0	0	0	0
67239	Rpf2	6	3	3	0.333333	0.272727	1	0	1	1	0	0	0	0	1	0	0	1	1	0	0	0	0	0	0	0	0
67832	Brix1	6	3	3	0.333333	0.272727	1	0	1	1	0	0	0	0	0	1	0	1	1	0	0	0	0	0	0	0	0
67849	Cdca5	6	2	4	0.222222	0.363636	1	0	1	0	0	0	1	0	1	0	0	1	1	0	0	0	0	0	0	0	0
67942	Atp5g2	6	1	5	0.111111	0.454545	1	0	0	0	1	0	0	0	1	1	1	0	1	0	0	0	0	0	0	0	0
67955	Sugt1	6	3	3	0.333333	0.272727	1	0	1	1	0	0	0	0	0	0	1	1	1	0	0	0	0	0	0	0	0
68147	Gar1	6	3	3	0.333333	0.272727	1	0	1	1	0	0	0	0	0	1	0	1	1	0	0	0	0	0	0	0	0
68971	Tamm41	6	3	3	0.333333	0.272727	1	0	1	1	0	0	0	0	1	0	0	1	1	0	0	0	0	0	0	0	0
70285	Rpf1	6	4	2	0.444444	0.181818	1	0	1	1	0	0	0	0	0	0	0	1	1	0	0	0	0	0	1	0	0
71514	Sfpq	6	2	4	0.222222	0.363636	1	0	0	1	0	1	0	0	1	0	0	1	1	0	0	0	0	0	0	0	0
71780	Isyna1	6	3	3	0.333333	0.272727	1	0	1	1	1	0	1	0	0	0	0	0	1	0	0	0	0	0	0	0	0
71990	Ddx54	6	2	4	0.222222	0.363636	1	0	1	0	0	0	0	0	1	1	0	1	1	0	0	0	0	0	0	0	0
73699	Ppp2r1b	6	2	4	0.222222	0.363636	1	0	0	1	0	1	0	0	1	0	0	1	1	0	0	0	0	0	0	0	0
75751	Ipo4	6	2	4	0.222222	0.363636	1	0	1	0	1	1	0	0	1	1	0	0	0	0	0	0	0	0	0	0	0
76582	Ipo11	6	3	3	0.333333	0.272727	1	0	1	1	0	0	0	0	0	1	0	1	1	0	0	0	0	0	0	0	0
80986	Ckap2	6	2	4	0.222222	0.363636	1	0	0	1	0	0	1	0	1	0	0	1	1	0	0	0	0	0	0	0	0
84505	Setdb1	6	3	3	0.333333	0.272727	1	0	0	1	0	0	0	0	1	0	0	1	1	0	0	0	0	0	0	0	1
50500	Ttpa	6	2	4	0.222222	0.363636	0	1	1	0	1	0	1	0	0	1	0	0	0	1	0	0	0	0	0	0	0
11636	Ak1	6	1	5	0.111111	0.454545	0	0	1	0	1	1	0	0	0	1	0	1	0	1	0	0	0	0	0	0	0
12040	Bckdhb	6	1	5	0.111111	0.454545	0	0	1	0	1	1	1	0	0	1	0	0	1	0	0	0	0	0	0	0	0
12832	Col5a2	6	2	4	0.222222	0.363636	0	0	1	1	0	0	0	0	0	1	1	1	1	0	0	0	0	0	0	0	0
27373	Csnk1e	6	1	5	0.111111	0.454545	0	0	1	0	0	0	1	0	1	1	1	1	0	0	0	0	0	0	0	0	0
13171	Dbt	6	2	4	0.222222	0.363636	0	0	1	1	1	0	0	0	0	1	0	1	1	0	0	0	0	0	0	0	0
13043	Cttn	6	2	4	0.222222	0.363636	0	0	1	1	0	1	0	0	0	1	0	1	1	0	0	0	0	0	0	0	0
14199	Fhl1	6	2	4	0.222222	0.363636	0	0	1	1	0	1	0	0	0	1	0	1	0	1	0	0	0	0	0	0	0
56717	Mtor	6	3	3	0.333333	0.272727	0	0	1	0	1	1	0	0	0	1	0	0	0	0	0	0	0	1	0	0	1
16324	Inhbb	6	3	3	0.333333	0.272727	0	0	1	1	0	0	0	0	1	0	0	1	0	1	0	0	0	0	0	0	1
17912	Myo1b	6	1	5	0.111111	0.454545	0	0	1	0	0	0	1	0	1	1	0	0	1	1	0	0	0	0	0	0	0
17855	Mvk	6	1	5	0.111111	0.454545	0	0	1	0	0	1	0	0	1	1	0	1	1	0	0	0	0	0	0	0	0
18590	Pdgfa	6	1	5	0.111111	0.454545	0	0	1	0	0	1	1	0	0	1	1	0	0	1	0	0	0	0	0	0	0
59126	Nek6	6	1	5	0.111111	0.454545	0	0	1	0	1	1	0	0	1	1	0	1	0	0	0	0	0	0	0	0	0
51793	Ddah2	6	1	5	0.111111	0.454545	0	0	1	0	0	0	0	0	1	1	1	1	1	0	0	0	0	0	0	0	0
18938	Ppp1r14b	6	1	5	0.111111	0.454545	0	0	1	0	1	0	0	0	1	1	0	1	1	0	0	0	0	0	0	0	0
18194	Nsdhl	6	2	4	0.222222	0.363636	0	0	1	1	0	0	0	0	1	1	0	1	1	0	0	0	0	0	0	0	0
29811	Ndrg2	6	1	5	0.111111	0.454545	0	0	1	0	1	1	0	0	0	1	1	0	0	1	0	0	0	0	0	0	0
74617	Scpep1	6	2	4	0.222222	0.363636	0	0	1	1	0	0	0	0	1	1	0	1	1	0	0	0	0	0	0	0	0
67767	Jagn1	6	2	4	0.222222	0.363636	0	0	1	1	0	1	0	0	0	1	0	1	1	0	0	0	0	0	0	0	0
67951	Tubb6	6	1	5	0.111111	0.454545	0	0	1	0	1	0	0	0	1	1	0	0	1	1	0	0	0	0	0	0	0
14314	Fstl1	6	1	5	0.111111	0.454545	0	0	0	1	0	1	1	0	0	0	1	0	1	1	0	0	0	0	0	0	0
16543	Mdfic	6	1	4	0.111111	0.363636	0	0	0	1	0	1	0	0	1	0	0	1	0	1	1	0	0	0	0	0	0
19317	Qk	6	1	5	0.111111	0.454545	0	0	0	1	0	0	0	0	1	1	1	1	1	0	0	0	0	0	0	0	0
22601	Yap1	6	1	5	0.111111	0.454545	0	0	0	1	0	1	1	0	1	0	0	1	1	0	0	0	0	0	0	0	0
67785	Zmym4	6	1	5	0.111111	0.454545	0	0	0	1	0	1	1	0	0	0	0	1	1	1	0	0	0	0	0	0	0
76453	Prss23	6	1	4	0.111111	0.363636	0	0	0	1	0	0	1	0	0	0	0	1	1	1	1	0	0	0	0	0	0
67305	Gpx7	6	0	6	0	0.545455	0	0	0	0	1	0	0	0	1	1	0	1	1	1	0	0	0	0	0	0	0
15108	Hsd17b10	6	0	6	0	0.545455	0	0	0	0	1	0	0	0	1	1	1	1	1	0	0	0	0	0	0	0	0
67255	Zfp422	6	0	6	0	0.545455	0	0	0	0	1	0	1	1	1	0	0	1	1	0	0	0	0	0	0	0	0
65963	Tmem176b	6	0	6	0	0.545455	0	0	0	0	1	1	0	0	1	1	0	1	0	1	0	0	0	0	0	0	0
66365	Ccdc90b	6	0	6	0	0.545455	0	0	0	0	1	1	0	0	1	1	0	1	1	0	0	0	0	0	0	0	0
76267	Fads1	6	0	6	0	0.545455	0	0	0	0	0	1	1	0	1	1	1	1	0	0	0	0	0	0	0	0	0
20677	Sox4	6	0	6	0	0.545455	0	0	0	0	0	0	1	1	1	0	1	0	1	1	0	0	0	0	0	0	0
16011	Igfbp5	6	0	5	0	0.454545	0	0	0	0	0	0	0	1	1	0	1	0	1	1	1	0	0	0	0	0	0
14360	Fyn	6	0	6	0	0.545455	0	0	0	0	0	0	0	0	1	1	1	1	1	1	0	0	0	0	0	0	0
17118	Marcks	6	0	6	0	0.545455	0	0	0	0	0	0	0	0	1	1	1	1	1	1	0	0	0	0	0	0	0
12387	Ctnnb1	5	2	3	0.222222	0.272727	0	0	0	0	0	0	0	0	0	0	1	0	1	0	0	0	0	0	1	1	1
12400	Cbfb	5	0	5	0	0.454545	0	0	0	0	1	0	0	0	1	0	0	1	1	0	0	0	0	0	0	1	0
12428	Ccna2	5	1	4	0.111111	0.363636	1	0	0	0	0	0	0	0	1	0	0	1	1	0	0	0	0	0	0	1	0
12442	Ccnb2	5	1	4	0.111111	0.363636	1	0	0	0	0	0	0	0	1	0	0	1	1	0	0	0	0	0	0	1	0
12448	Ccne2	5	1	4	0.111111	0.363636	0	0	0	1	0	0	0	0	1	0	0	1	1	0	0	0	0	0	0	1	0
14609	Gja1	5	1	4	0.111111	0.363636	0	0	0	1	0	1	0	0	0	0	0	0	1	1	0	0	0	0	0	1	0
14630	Gclm	5	2	3	0.222222	0.272727	1	0	0	1	0	1	0	0	0	0	0	1	0	0	0	0	0	0	0	1	0
15205	Hes1	5	0	5	0	0.454545	0	0	0	0	0	1	1	0	1	0	0	0	1	0	0	0	0	0	0	1	0
15395	Hoxa10	5	1	4	0.111111	0.363636	0	0	0	1	1	1	0	0	0	0	0	0	0	1	0	0	0	0	0	1	0
17260	Mef2c	5	1	4	0.111111	0.363636	0	0	0	0	1	0	0	0	1	0	1	0	0	0	0	0	0	0	0	1	1
17480	Mpl	5	1	4	0.111111	0.363636	0	0	0	0	1	1	0	0	0	0	0	0	0	1	0	0	0	0	0	1	1
18227	Nr4a2	5	0	5	0	0.454545	0	0	0	0	1	1	0	0	0	1	0	0	0	1	0	0	0	0	0	1	0
18476	Pafah1b3	5	0	5	0	0.454545	0	0	0	0	0	0	0	0	1	1	0	1	1	0	0	0	0	0	0	1	0
27221	Chaf1a	5	1	4	0.111111	0.363636	0	0	0	1	0	0	0	0	1	0	0	1	1	0	0	0	0	0	0	1	0
54383	Phc2	5	0	5	0	0.454545	0	0	0	0	0	1	0	1	1	0	0	0	1	0	0	0	0	0	0	1	0
83964	Jam3	5	0	5	0	0.454545	0	0	0	0	1	0	0	1	0	1	1	0	0	0	0	0	0	0	0	1	0
12561	Cdh4	5	1	4	0.111111	0.363636	0	0	0	0	0	0	0	0	1	1	0	1	1	0	0	1	0	0	0	0	0
14009	Etv1	5	2	3	0.222222	0.272727	0	0	1	0	1	0	0	0	0	1	0	1	0	0	0	1	0	0	0	0	0
56490	Zbtb20	5	2	3	0.222222	0.272727	0	0	0	0	0	0	0	1	0	0	1	0	0	1	0	1	0	0	1	0	0
17975	Ncl	5	3	2	0.333333	0.181818	1	0	0	0	0	0	0	0	0	0	0	1	1	0	0	1	0	0	0	0	1
18032	Nfix	5	1	4	0.111111	0.363636	0	0	0	0	0	0	0	1	0	1	1	0	0	1	0	1	0	0	0	0	0
56530	Cnpy2	5	1	4	0.111111	0.363636	0	0	0	0	0	1	0	0	0	1	1	0	1	0	0	1	0	0	0	0	0
26409	Map3k7	5	3	2	0.333333	0.181818	1	0	0	1	0	0	0	0	0	0	0	1	1	0	0	1	0	0	0	0	0
21406	Tcf12	5	1	4	0.111111	0.363636	0	0	0	0	0	0	0	0	1	0	1	1	1	0	0	1	0	0	0	0	0
78246	Phf23	5	3	2	0.333333	0.181818	1	0	1	0	0	1	0	0	0	0	0	0	1	0	0	1	0	0	0	0	0
11615	Gm4737	5	2	3	0.222222	0.272727	1	0	0	1	0	0	0	0	1	0	0	1	1	0	0	0	0	0	0	0	0
11637	Ak2	5	2	3	0.222222	0.272727	1	0	1	0	0	0	0	0	1	0	0	1	1	0	0	0	0	0	0	0	0
11931	Atp1b1	5	2	3	0.222222	0.272727	1	0	0	1	1	0	0	0	0	0	0	1	1	0	0	0	0	0	0	0	0
11991	Hnrnpd	5	2	3	0.222222	0.272727	1	0	0	1	0	0	0	0	1	0	0	1	1	0	0	0	0	0	0	0	0
12034	Phb2	5	2	3	0.222222	0.272727	1	0	1	0	0	0	0	0	0	1	0	1	1	0	0	0	0	0	0	0	0
12039	Bckdha	5	2	3	0.222222	0.272727	1	0	1	0	1	0	1	0	0	1	0	0	0	0	0	0	0	0	0	0	0
12144	Blm	5	3	2	0.333333	0.181818	1	0	1	1	0	0	0	0	0	0	0	1	1	0	0	0	0	0	0	0	0
12224	Klf5	5	5	0	0.555556	0	1	1	1	1	0	0	0	0	0	0	0	0	0	0	0	0	0	0	0	0	1
12321	Calu	5	2	3	0.222222	0.272727	1	0	0	1	0	0	0	0	0	0	1	1	1	0	0	0	0	0	0	0	0
12385	Ctnna1	5	3	2	0.333333	0.181818	1	0	1	1	0	0	0	0	0	0	1	0	1	0	0	0	0	0	0	0	0
12462	Cct3	5	2	3	0.222222	0.272727	1	0	0	1	0	0	0	0	1	0	0	1	1	0	0	0	0	0	0	0	0
12464	Cct4	5	2	3	0.222222	0.272727	1	0	0	1	0	0	0	0	1	0	0	1	1	0	0	0	0	0	0	0	0
12465	Cct5	5	2	3	0.222222	0.272727	1	0	0	1	0	0	0	0	1	0	0	1	1	0	0	0	0	0	0	0	0
12466	Cct6a	5	3	2	0.333333	0.181818	1	0	1	1	0	0	0	0	0	0	0	1	1	0	0	0	0	0	0	0	0
12566	Cdk2	5	2	3	0.222222	0.272727	1	0	0	0	0	0	0	0	1	0	0	1	1	0	0	0	0	0	0	0	1
13006	Smc3	5	3	2	0.333333	0.181818	1	0	0	1	0	0	0	0	0	0	0	1	1	0	0	0	0	0	1	0	0
13018	Ctcf	5	2	3	0.222222	0.272727	1	0	0	0	0	0	0	0	1	0	0	1	1	0	0	0	0	0	0	0	1
13211	Dhx9	5	3	2	0.333333	0.181818	1	0	1	0	1	0	0	0	0	0	0	0	1	0	0	0	0	0	0	0	1
13433	Dnmt1	5	2	3	0.222222	0.272727	1	0	0	0	0	0	0	0	1	0	0	1	1	0	0	0	0	0	0	0	1
13494	Drg1	5	3	2	0.333333	0.181818	1	0	1	1	0	0	0	0	0	0	0	1	1	0	0	0	0	0	0	0	0
13589	Mapre1	5	1	4	0.111111	0.363636	1	0	0	0	0	0	0	0	1	0	1	1	1	0	0	0	0	0	0	0	0
13626	Eed	5	3	2	0.333333	0.181818	1	0	0	1	0	0	0	0	0	0	0	1	1	0	0	0	0	0	0	0	1
13644	Efs	5	2	3	0.222222	0.272727	1	0	0	1	0	0	0	0	1	0	0	1	1	0	0	0	0	0	0	0	0
13877	Erh	5	2	3	0.222222	0.272727	1	0	0	1	0	0	0	0	1	0	0	1	1	0	0	0	0	0	0	0	0
14113	Fbl	5	2	3	0.222222	0.272727	1	0	1	0	0	0	0	0	0	1	0	1	1	0	0	0	0	0	0	0	0
14156	Fen1	5	2	3	0.222222	0.272727	1	0	1	0	0	0	0	0	1	0	0	1	1	0	0	0	0	0	0	0	0
14175	Fgf4	5	5	0	0.555556	0	1	1	1	1	0	0	0	0	0	0	0	0	0	0	0	0	0	0	0	0	1
14211	Smc2	5	2	3	0.222222	0.272727	1	0	0	1	0	0	0	0	1	0	0	1	1	0	0	0	0	0	0	0	0
14228	Fkbp4	5	3	2	0.333333	0.181818	1	0	1	1	0	0	0	0	1	0	0	0	1	0	0	0	0	0	0	0	0
14272	Fnta	5	3	2	0.333333	0.181818	1	0	1	1	0	1	0	0	0	0	1	0	0	0	0	0	0	0	0	0	0
14852	Gspt1	5	2	3	0.222222	0.272727	1	0	0	1	0	0	0	0	1	0	0	1	1	0	0	0	0	0	0	0	0
14911	Thumpd3	5	3	2	0.333333	0.181818	1	0	1	1	0	0	0	0	0	0	0	1	1	0	0	0	0	0	0	0	0
15469	Prmt1	5	2	3	0.222222	0.272727	1	0	0	1	0	0	0	0	1	0	0	1	1	0	0	0	0	0	0	0	0
15488	Hsd17b4	5	1	4	0.111111	0.363636	1	0	0	0	0	0	0	0	1	0	1	1	1	0	0	0	0	0	0	0	0
15528	Hspe1	5	2	3	0.222222	0.272727	1	0	0	1	0	0	0	0	1	0	0	1	1	0	0	0	0	0	0	0	0
15568	Elavl1	5	3	2	0.333333	0.181818	1	0	1	1	0	0	0	0	0	0	0	1	1	0	0	0	0	0	0	0	0
16211	Kpnb1	5	3	2	0.333333	0.181818	1	0	0	1	0	0	0	0	0	0	0	1	1	0	0	0	0	0	0	0	1
16319	Incenp	5	1	4	0.111111	0.363636	1	0	0	0	0	0	1	0	1	0	0	1	1	0	0	0	0	0	0	0	0
17192	Mbd3	5	3	2	0.333333	0.181818	1	0	0	0	0	0	0	0	1	0	0	0	1	0	0	0	1	0	0	0	1
17220	Mcm7	5	1	4	0.111111	0.363636	1	0	0	0	0	0	1	0	1	0	0	1	1	0	0	0	0	0	0	0	0
17242	Mdk	5	2	3	0.222222	0.272727	1	0	1	0	0	0	0	0	1	1	0	0	1	0	0	0	0	0	0	0	0
17765	Mtf2	5	4	1	0.444444	0.0909091	1	1	0	1	0	0	0	0	0	0	0	0	1	0	0	0	0	0	0	0	1
17766	Nudt1	5	2	3	0.222222	0.272727	1	0	0	1	0	0	0	0	1	0	0	1	1	0	0	0	0	0	0	0	0
18082	Nipsnap1	5	2	3	0.222222	0.272727	1	0	0	1	0	1	0	0	0	0	0	0	1	1	0	0	0	0	0	0	0
18100	Mrpl40	5	2	3	0.222222	0.272727	1	0	1	0	0	1	0	0	0	1	0	0	1	0	0	0	0	0	0	0	0
18131	Notch3	5	2	3	0.222222	0.272727	1	0	0	1	0	0	0	0	1	0	0	1	1	0	0	0	0	0	0	0	0
18140	Uhrf1	5	2	3	0.222222	0.272727	1	0	0	0	0	0	0	0	1	0	0	1	1	0	0	0	0	0	0	0	1
18148	Npm1	5	2	3	0.222222	0.272727	1	0	0	1	0	0	0	0	1	0	0	1	1	0	0	0	0	0	0	0	0
18408	Slc25a15	5	3	2	0.333333	0.181818	1	0	1	1	1	0	0	0	0	0	0	1	0	0	0	0	0	0	0	0	0
18538	Pcna	5	2	3	0.222222	0.272727	1	0	0	0	0	0	0	0	1	0	0	1	1	0	0	0	1	0	0	0	0
18669	Abcb1b	5	2	3	0.222222	0.272727	1	0	0	1	0	1	0	0	0	0	0	1	0	1	0	0	0	0	0	0	0
18813	Pa2g4	5	3	2	0.333333	0.181818	1	0	1	1	0	0	0	0	0	0	0	1	1	0	0	0	0	0	0	0	0
18986	Pou2f1	5	3	2	0.333333	0.181818	1	0	0	0	0	0	1	0	0	0	0	0	1	0	0	0	0	0	1	0	1
19075	Prim1	5	2	3	0.222222	0.272727	1	0	1	0	0	0	0	0	1	0	0	1	1	0	0	0	0	0	0	0	0
19139	Prps1	5	3	2	0.333333	0.181818	1	0	0	1	0	0	0	0	0	0	0	1	1	0	0	0	0	1	0	0	0
19172	Psmb4	5	1	4	0.111111	0.363636	1	0	0	0	1	0	0	0	1	0	0	1	1	0	0	0	0	0	0	0	0
19173	Psmb5	5	3	2	0.333333	0.181818	1	0	1	1	0	0	0	0	0	0	0	1	1	0	0	0	0	0	0	0	0
19175	Psmb6	5	2	3	0.222222	0.272727	1	0	1	0	0	0	0	0	0	1	0	1	1	0	0	0	0	0	0	0	0
19179	Psmc1	5	2	3	0.222222	0.272727	1	0	1	0	0	0	0	0	0	1	0	1	1	0	0	0	0	0	0	0	0
19181	Psmc2	5	3	2	0.333333	0.181818	1	0	1	1	0	0	0	0	0	0	0	1	1	0	0	0	0	0	0	0	0
19183	Psmc3ip	5	3	2	0.333333	0.181818	1	0	1	1	0	0	0	0	0	0	0	1	1	0	0	0	0	0	0	0	0
19246	Ptpn1	5	1	4	0.111111	0.363636	1	0	0	0	0	0	0	0	1	0	1	1	1	0	0	0	0	0	0	0	0
19352	Rabggtb	5	2	3	0.222222	0.272727	1	0	0	1	0	1	0	0	0	0	1	1	0	0	0	0	0	0	0	0	0
19355	Rad1	5	3	2	0.333333	0.181818	1	0	1	1	0	0	0	0	0	0	0	1	1	0	0	0	0	0	0	0	0
19357	Rad21	5	2	3	0.222222	0.272727	1	0	0	0	0	0	0	0	1	0	0	1	1	0	0	0	1	0	0	0	0
19384	Ran	5	2	3	0.222222	0.272727	1	0	0	1	0	0	0	0	1	0	0	1	1	0	0	0	0	0	0	0	0
19428	Rasl2-9	5	2	3	0.222222	0.272727	1	0	0	1	0	0	0	0	1	0	0	1	1	0	0	0	0	0	0	0	0
19647	Rbbp6	5	1	4	0.111111	0.363636	1	0	0	0	1	1	0	0	1	0	0	0	1	0	0	0	0	0	0	0	0
19663	Rbpms	5	2	3	0.222222	0.272727	1	0	0	1	0	1	0	0	0	0	0	0	1	1	0	0	0	0	0	0	0
19684	Rdx	5	2	3	0.222222	0.272727	1	0	0	1	0	0	0	0	1	0	0	1	1	0	0	0	0	0	0	0	0
19720	Trim27	5	2	3	0.222222	0.272727	1	0	0	1	0	0	0	0	1	0	0	1	1	0	0	0	0	0	0	0	0
19777	Uri1	5	2	3	0.222222	0.272727	1	0	0	1	0	1	0	0	0	0	1	1	0	0	0	0	0	0	0	0	0
20425	Shmt1	5	2	3	0.222222	0.272727	1	0	0	1	0	0	0	0	1	0	0	1	1	0	0	0	0	0	0	0	0
20462	Tra2b	5	2	3	0.222222	0.272727	1	0	0	1	0	0	0	0	1	0	0	1	1	0	0	0	0	0	0	0	0
20467	Sin3b	5	1	4	0.111111	0.363636	1	0	0	0	0	0	0	0	1	1	0	1	1	0	0	0	0	0	0	0	0
20480	Clpb	5	2	3	0.222222	0.272727	1	0	1	0	1	0	0	0	0	1	0	1	0	0	0	0	0	0	0	0	0
20595	Smn1	5	3	2	0.333333	0.181818	1	0	1	1	0	0	0	0	1	0	0	0	1	0	0	0	0	0	0	0	0
20603	Sms	5	2	3	0.222222	0.272727	1	0	0	1	0	1	0	0	0	0	0	1	1	0	0	0	0	0	0	0	0
20630	Snrpc	5	2	3	0.222222	0.272727	1	0	0	1	0	1	0	0	0	0	0	1	1	0	0	0	0	0	0	0	0
20641	Snrpd1	5	3	2	0.333333	0.181818	1	0	1	1	0	0	0	0	1	0	0	0	1	0	0	0	0	0	0	0	0
20841	Zfp143	5	4	1	0.444444	0.0909091	1	0	1	1	0	0	0	0	0	0	0	0	1	0	0	0	0	0	0	0	1
20873	Plk4	5	2	3	0.222222	0.272727	1	0	0	1	0	0	0	0	1	0	0	1	1	0	0	0	0	0	0	0	0
21335	Tacc3	5	2	3	0.222222	0.272727	1	0	0	1	0	0	0	0	1	0	0	1	1	0	0	0	0	0	0	0	0
21371	Tbca	5	2	3	0.222222	0.272727	1	0	0	1	0	0	0	0	1	0	0	1	1	0	0	0	0	0	0	0	0
21432	Tcl1	5	5	0	0.555556	0	1	1	1	1	0	0	0	0	0	0	0	0	0	0	0	0	0	0	0	0	1
21749	Terf1	5	3	2	0.333333	0.181818	1	0	1	1	0	0	0	0	0	0	0	1	1	0	0	0	0	0	0	0	0
22032	Traf4	5	1	4	0.111111	0.363636	1	0	0	0	0	1	0	0	1	0	0	1	1	0	0	0	0	0	0	0	0
22154	Tubb5	5	2	3	0.222222	0.272727	1	0	0	1	0	0	0	0	1	0	0	1	1	0	0	0	0	0	0	0	0
22247	Umps	5	2	3	0.222222	0.272727	1	0	0	1	1	1	0	0	0	0	0	1	0	0	0	0	0	0	0	0	0
22361	Vnn1	5	1	3	0.111111	0.272727	1	0	0	0	0	1	1	0	0	0	0	0	0	1	1	0	0	0	0	0	0
22390	Wee1	5	2	3	0.222222	0.272727	1	0	0	1	0	0	1	0	0	0	0	1	1	0	0	0	0	0	0	0	0
22680	Zfp207	5	2	3	0.222222	0.272727	1	0	0	1	0	0	0	0	1	0	0	1	1	0	0	0	0	0	0	0	0
22773	Zic3	5	3	2	0.333333	0.181818	1	0	0	1	0	0	0	0	1	0	0	0	1	0	0	0	0	0	0	0	1
23808	Ash2l	5	3	2	0.333333	0.181818	1	0	1	1	0	0	0	0	1	0	0	1	0	0	0	0	0	0	0	0	0
23825	Banf1	5	2	3	0.222222	0.272727	1	0	0	1	0	0	0	0	1	0	0	1	1	0	0	0	0	0	0	0	0
23834	Cdc6	5	2	3	0.222222	0.272727	1	0	0	1	0	0	0	0	1	0	0	1	1	0	0	0	0	0	0	0	0
23950	Dnajb6	5	2	3	0.222222	0.272727	1	0	0	1	0	1	0	0	0	0	0	1	1	0	0	0	0	0	0	0	0
26384	Gnpda1	5	3	2	0.333333	0.181818	1	0	1	1	0	0	0	0	1	0	0	1	0	0	0	0	0	0	0	0	0
26430	Parg	5	3	2	0.333333	0.181818	1	0	1	1	0	0	0	0	0	0	0	1	1	0	0	0	0	0	0	0	0
26912	Gcat	5	2	3	0.222222	0.272727	1	0	0	1	0	1	0	0	0	0	0	1	0	1	0	0	0	0	0	0	0
27041	G3bp1	5	2	3	0.222222	0.272727	1	0	0	1	0	0	0	0	1	0	0	1	1	0	0	0	0	0	0	0	0
27756	Lsm2	5	2	3	0.222222	0.272727	1	0	0	1	0	0	0	0	1	0	0	1	1	0	0	0	0	0	0	0	0
28036	Larp7	5	2	3	0.222222	0.272727	1	0	0	1	0	0	0	0	1	0	0	1	1	0	0	0	0	0	0	0	0
28109	D10Wsu102e	5	2	3	0.222222	0.272727	1	0	0	1	0	1	0	0	0	0	0	1	1	0	0	0	0	0	0	0	0
28126	Nop16	5	2	3	0.222222	0.272727	1	0	0	1	0	0	0	0	1	0	0	1	1	0	0	0	0	0	0	0	0
29870	Gtse1	5	2	3	0.222222	0.272727	1	0	1	0	0	0	0	0	1	0	0	1	1	0	0	0	0	0	0	0	0
50764	Fbxo15	5	5	0	0.555556	0	1	1	1	1	0	0	0	0	0	0	0	0	0	0	0	0	0	0	0	0	1
50927	Nasp	5	2	3	0.222222	0.272727	1	0	0	1	0	0	0	0	1	0	0	1	1	0	0	0	0	0	0	0	0
50995	Uba2	5	3	2	0.333333	0.181818	1	0	1	1	0	0	0	0	0	0	0	1	1	0	0	0	0	0	0	0	0
52615	Suz12	5	3	2	0.333333	0.181818	1	0	0	1	0	0	0	0	1	0	0	1	0	0	0	0	0	0	0	0	1
53379	Hnrnpa2b1	5	2	3	0.222222	0.272727	1	0	0	1	0	0	0	0	1	0	0	1	1	0	0	0	0	0	0	0	0
53414	Bysl	5	2	3	0.222222	0.272727	1	0	0	1	0	1	0	0	0	0	0	1	1	0	0	0	0	0	0	0	0
53872	Caprin1	5	1	4	0.111111	0.363636	1	0	0	0	0	0	0	0	1	0	1	1	1	0	0	0	0	0	0	0	0
54124	Cks1b	5	2	3	0.222222	0.272727	1	0	0	1	0	0	0	0	1	0	0	1	1	0	0	0	0	0	0	0	0
55949	Eef1b2	5	2	3	0.222222	0.272727	1	0	1	0	0	0	0	0	0	0	1	1	1	0	0	0	0	0	0	0	0
56070	Tcerg1	5	2	3	0.222222	0.272727	1	0	0	1	0	0	0	0	1	0	0	1	1	0	0	0	0	0	0	0	0
56086	Set	5	2	3	0.222222	0.272727	1	0	0	1	0	0	0	0	1	0	0	1	1	0	0	0	0	0	0	0	0
56095	Ftsj3	5	3	2	0.333333	0.181818	1	0	1	1	0	0	0	0	0	0	0	1	1	0	0	0	0	0	0	0	0
56150	Mad2l1	5	2	3	0.222222	0.272727	1	0	0	1	0	0	0	0	1	0	0	1	1	0	0	0	0	0	0	0	0
56190	Rbm38	5	1	4	0.111111	0.363636	1	0	0	0	0	1	1	0	1	0	0	0	1	0	0	0	0	0	0	0	0
56306	Fam60a	5	2	3	0.222222	0.272727	1	0	0	1	0	0	1	0	0	0	0	1	1	0	0	0	0	0	0	0	0
56422	Hbs1l	5	2	3	0.222222	0.272727	1	0	0	1	0	0	0	0	1	0	0	1	1	0	0	0	0	0	0	0	0
56452	Orc6	5	3	2	0.333333	0.181818	1	0	1	1	0	0	0	0	0	0	0	1	1	0	0	0	0	0	0	0	0
56456	Actl6a	5	2	3	0.222222	0.272727	1	0	0	1	0	0	0	0	1	0	0	1	1	0	0	0	0	0	0	0	0
56749	Dhodh	5	3	2	0.333333	0.181818	1	0	1	1	1	0	0	0	0	1	0	0	0	0	0	0	0	0	0	0	0
57261	Brd4	5	1	4	0.111111	0.363636	1	0	0	0	0	1	0	0	1	0	1	0	1	0	0	0	0	0	0	0	0
57315	Wdr46	5	3	2	0.333333	0.181818	1	0	1	1	0	0	0	0	0	1	0	1	0	0	0	0	0	0	0	0	0
57438	39142	5	2	3	0.222222	0.272727	1	0	0	1	0	1	0	0	1	0	0	1	0	0	0	0	0	0	0	0	0
59014	Rrs1	5	3	2	0.333333	0.181818	1	0	1	1	0	0	0	0	0	0	0	1	1	0	0	0	0	0	0	0	0
60406	Sap30	5	2	3	0.222222	0.272727	1	0	0	1	0	0	0	0	1	0	0	1	1	0	0	0	0	0	0	0	0
60409	Trappc4	5	1	4	0.111111	0.363636	1	0	0	0	1	0	0	0	1	0	0	1	1	0	0	0	0	0	0	0	0
60530	Fignl1	5	2	3	0.222222	0.272727	1	0	0	1	0	0	0	0	1	0	0	1	1	0	0	0	0	0	0	0	0
64934	Pes1	5	2	3	0.222222	0.272727	1	0	1	0	0	0	0	0	0	1	0	1	1	0	0	0	0	0	0	0	0
65961	Utp3	5	3	2	0.333333	0.181818	1	0	1	1	0	0	0	0	0	0	0	1	1	0	0	0	0	0	0	0	0
66131	Tipin	5	3	2	0.333333	0.181818	1	0	1	1	0	0	0	0	0	0	0	1	1	0	0	0	0	0	0	0	0
66197	Cks2	5	2	3	0.222222	0.272727	1	0	0	1	0	0	0	0	1	0	0	1	1	0	0	0	0	0	0	0	0
66276	1810009A15Rik	5	2	3	0.222222	0.272727	1	0	0	1	0	0	0	0	1	0	0	1	1	0	0	0	0	0	0	0	0
66403	Asf1a	5	2	3	0.222222	0.272727	1	0	0	1	0	0	0	0	1	0	0	1	1	0	0	0	0	0	0	0	0
66406	Sac3d1	5	1	4	0.111111	0.363636	1	0	0	0	0	1	0	0	1	0	0	1	1	0	0	0	0	0	0	0	0
66420	Polr2e	5	2	3	0.222222	0.272727	1	0	1	0	1	0	0	0	1	0	0	0	1	0	0	0	0	0	0	0	0
66446	Exosc7	5	3	2	0.333333	0.181818	1	0	1	1	0	0	0	0	0	0	0	1	1	0	0	0	0	0	0	0	0
66488	Fam136a	5	2	3	0.222222	0.272727	1	0	0	1	0	0	0	0	1	0	0	1	1	0	0	0	0	0	0	0	0
66585	Snrnp40	5	2	3	0.222222	0.272727	1	0	0	1	0	0	0	0	1	0	0	1	1	0	0	0	0	0	0	0	0
66894	Wwp2	5	2	3	0.222222	0.272727	1	0	0	0	0	1	0	0	0	0	1	0	1	0	0	0	0	0	0	0	1
66949	Trim59	5	2	3	0.222222	0.272727	1	0	0	1	0	0	0	0	1	0	0	1	1	0	0	0	0	0	0	0	0
67134	Nop56	5	2	3	0.222222	0.272727	1	0	0	1	0	1	0	0	0	0	0	1	1	0	0	0	0	0	0	0	0
67153	Rnaseh2b	5	2	3	0.222222	0.272727	1	0	0	1	0	0	0	0	1	0	0	1	1	0	0	0	0	0	0	0	0
67203	Nde1	5	2	3	0.222222	0.272727	1	0	1	0	0	0	0	0	1	0	0	1	1	0	0	0	0	0	0	0	0
67332	Snrpd3	5	3	2	0.333333	0.181818	1	0	1	1	0	0	0	0	0	0	0	1	1	0	0	0	0	0	0	0	0
67337	Cstf1	5	2	3	0.222222	0.272727	1	0	0	1	0	1	0	0	1	0	0	0	1	0	0	0	0	0	0	0	0
67451	Pkp2	5	3	2	0.333333	0.181818	1	0	1	1	0	1	0	0	0	0	0	0	1	0	0	0	0	0	0	0	0
67530	Uqcrb	5	2	3	0.222222	0.272727	1	0	0	1	0	0	0	0	1	0	0	1	1	0	0	0	0	0	0	0	0
67678	Lsm3	5	2	3	0.222222	0.272727	1	0	0	1	0	0	0	0	1	0	0	1	1	0	0	0	0	0	0	0	0
67949	Nifk	5	2	3	0.222222	0.272727	1	0	0	1	0	1	0	0	0	0	0	1	1	0	0	0	0	0	0	0	0
68011	Snrpg	5	2	3	0.222222	0.272727	1	0	0	1	0	0	0	0	1	0	0	1	1	0	0	0	0	0	0	0	0
68036	Zfp706	5	2	3	0.222222	0.272727	1	0	0	1	0	0	0	0	1	0	0	1	1	0	0	0	0	0	0	0	0
68043	N6amt2	5	3	2	0.333333	0.181818	1	0	1	1	0	1	0	0	0	1	0	0	0	0	0	0	0	0	0	0	0
68051	Nutf2	5	2	3	0.222222	0.272727	1	0	0	1	0	0	0	0	1	0	0	1	1	0	0	0	0	0	0	0	0
68183	Bcas2	5	3	2	0.333333	0.181818	1	0	1	1	0	0	0	0	1	0	0	1	0	0	0	0	0	0	0	0	0
68201	Ccdc34	5	2	3	0.222222	0.272727	1	0	0	1	0	0	0	0	1	0	0	1	1	0	0	0	0	0	0	0	0
68219	Nudt21	5	2	3	0.222222	0.272727	1	0	0	1	0	0	0	0	1	0	0	1	1	0	0	0	0	0	0	0	0
68544	2310036O22Rik	5	2	3	0.222222	0.272727	1	0	1	0	1	0	0	0	0	1	0	0	1	0	0	0	0	0	0	0	0
68926	Ubap2	5	2	3	0.222222	0.272727	1	0	0	1	0	0	0	0	1	0	0	1	1	0	0	0	0	0	0	0	0
68988	Prpf31	5	2	3	0.222222	0.272727	1	0	0	1	0	0	0	0	1	0	0	1	1	0	0	0	0	0	0	0	0
69072	Ebna1bp2	5	3	2	0.333333	0.181818	1	0	1	1	0	0	0	0	0	0	0	1	1	0	0	0	0	0	0	0	0
69077	Psmd11	5	2	3	0.222222	0.272727	1	0	0	1	0	0	0	0	1	0	0	1	1	0	0	0	0	0	0	0	0
69263	Rfc3	5	1	4	0.111111	0.363636	1	0	0	0	0	1	0	0	1	0	0	1	1	0	0	0	0	0	0	0	0
69716	Trip13	5	2	3	0.222222	0.272727	1	0	0	1	0	0	0	0	1	0	0	1	1	0	0	0	0	0	0	0	0
69724	Rnaseh2a	5	3	2	0.333333	0.181818	1	0	1	1	0	0	0	0	0	0	0	1	1	0	0	0	0	0	0	0	0
69833	Polr2f	5	2	3	0.222222	0.272727	1	0	0	1	0	0	0	0	1	0	0	1	1	0	0	0	0	0	0	0	0
69902	Mrto4	5	3	2	0.333333	0.181818	1	0	1	1	0	0	0	0	0	0	0	1	1	0	0	0	0	0	0	0	0
69953	2810025M15Rik	5	2	3	0.222222	0.272727	1	0	0	1	0	0	0	0	1	0	0	1	1	0	0	0	0	0	0	0	0
69956	Ptcd3	5	3	2	0.333333	0.181818	1	0	1	1	0	1	0	0	0	0	0	0	1	0	0	0	0	0	0	0	0
70021	Nt5dc2	5	2	3	0.222222	0.272727	1	0	0	1	0	0	0	0	1	0	0	1	1	0	0	0	0	0	0	0	0
70361	Lman1	5	2	3	0.222222	0.272727	1	0	0	1	0	0	0	0	0	0	1	1	1	0	0	0	0	0	0	0	0
70396	Asnsd1	5	1	4	0.111111	0.363636	1	0	0	0	0	0	0	0	1	0	1	1	1	0	0	0	0	0	0	0	0
70683	Utp20	5	3	2	0.333333	0.181818	1	0	1	1	0	1	0	0	0	0	0	1	0	0	0	0	0	0	0	0	0
71702	Cdc5l	5	3	2	0.333333	0.181818	1	0	1	1	0	0	0	0	0	0	0	1	1	0	0	0	0	0	0	0	0
71943	Tom1l1	5	2	3	0.222222	0.272727	1	0	0	1	0	1	0	0	0	0	0	1	1	0	0	0	0	0	0	0	0
72151	Rfc5	5	2	3	0.222222	0.272727	1	0	0	1	0	0	0	0	1	0	0	1	1	0	0	0	0	0	0	0	0
72415	Sgol1	5	2	3	0.222222	0.272727	1	0	0	1	0	0	0	0	1	0	0	1	1	0	0	0	0	0	0	0	0
72515	Wdr43	5	2	3	0.222222	0.272727	1	0	0	1	0	1	0	0	0	0	0	1	1	0	0	0	0	0	0	0	0
72658	2700097O09Rik	5	2	3	0.222222	0.272727	1	0	0	1	0	1	0	0	1	0	0	0	1	0	0	0	0	0	0	0	0
73736	Fcf1	5	2	3	0.222222	0.272727	1	0	0	1	0	1	0	0	0	0	0	1	1	0	0	0	0	0	0	0	0
73847	Fam110a	5	1	4	0.111111	0.363636	1	0	0	0	0	1	0	0	1	0	0	1	1	0	0	0	0	0	0	0	0
74254	Gpn1	5	2	3	0.222222	0.272727	1	0	0	1	0	1	0	0	1	0	0	0	1	0	0	0	0	0	0	0	0
74706	4930507D05Rik	5	1	4	0.111111	0.363636	1	0	0	0	0	1	0	0	1	0	0	1	1	0	0	0	0	0	0	0	0
75553	Zc3h14	5	2	3	0.222222	0.272727	1	0	0	1	0	1	0	0	0	0	0	1	1	0	0	0	0	0	0	0	0
78372	Snrnp25	5	2	3	0.222222	0.272727	1	0	0	1	0	0	0	0	0	1	0	1	1	0	0	0	0	0	0	0	0
80280	Cdk5rap3	5	2	3	0.222222	0.272727	1	0	1	0	0	0	0	0	0	1	1	0	1	0	0	0	0	0	0	0	0
81879	Tfcp2l1	5	4	1	0.444444	0.0909091	1	0	1	1	0	1	0	0	0	0	0	0	0	0	0	0	0	0	0	0	1
83673	Snhg1	5	1	4	0.111111	0.363636	1	0	0	0	0	1	0	0	1	0	1	0	1	0	0	0	0	0	0	0	0
27053	Asns	5	3	2	0.333333	0.181818	0	1	1	1	0	1	0	0	0	0	0	1	0	0	0	0	0	0	0	0	0
19664	Rbpj	5	3	2	0.333333	0.181818	0	1	0	1	0	0	0	0	0	0	0	1	1	0	0	0	0	0	0	0	1
17762	Mapt	5	2	3	0.222222	0.272727	0	1	1	0	0	0	0	0	1	1	1	0	0	0	0	0	0	0	0	0	0
16600	Klf4	5	2	3	0.222222	0.272727	0	1	0	0	1	0	0	0	0	0	1	0	0	1	0	0	0	0	0	0	1
17768	Mthfd2	5	2	3	0.222222	0.272727	0	1	0	1	0	0	0	0	1	0	0	1	1	0	0	0	0	0	0	0	0
73710	Tubb2b	5	1	4	0.111111	0.363636	0	1	0	0	0	1	1	0	1	0	0	1	0	0	0	0	0	0	0	0	0
15260	Hira	5	2	3	0.222222	0.272727	0	0	0	0	1	0	0	0	1	0	0	0	1	0	0	0	1	0	0	0	1
22201	Uba1	5	3	2	0.333333	0.181818	0	0	1	1	1	0	0	0	0	0	0	1	0	0	0	0	1	0	0	0	0
11639	Ak4	5	3	2	0.333333	0.181818	0	0	1	1	0	1	0	0	0	1	0	0	0	0	0	0	0	1	0	0	0
11676	Aldoc	5	1	4	0.111111	0.363636	0	0	1	0	0	1	0	0	0	1	1	0	0	1	0	0	0	0	0	0	0
13121	Cyp51	5	2	3	0.222222	0.272727	0	0	1	1	0	0	0	0	0	1	0	1	1	0	0	0	0	0	0	0	0
53310	Dlg3	5	1	3	0.111111	0.272727	0	0	1	0	1	1	0	0	0	0	0	0	0	1	1	0	0	0	0	0	0
18612	Etv4	5	2	3	0.222222	0.272727	0	0	1	1	1	0	0	0	1	0	0	1	0	0	0	0	0	0	0	0	0
226519	Lamc1	5	1	4	0.111111	0.363636	0	0	1	0	1	0	0	0	0	1	1	0	0	1	0	0	0	0	0	0	0
16832	Ldhb	5	1	3	0.111111	0.272727	0	0	1	0	0	1	0	0	0	1	1	0	0	0	1	0	0	0	0	0	0
18597	Pdha1	5	2	3	0.222222	0.272727	0	0	1	1	0	0	0	0	0	1	1	1	0	0	0	0	0	0	0	0	0
66385	Ppp1r7	5	2	3	0.222222	0.272727	0	0	1	1	0	0	0	0	0	1	0	1	1	0	0	0	0	0	0	0	0
20014	Rpn2	5	1	4	0.111111	0.363636	0	0	1	0	0	0	0	0	1	1	0	1	1	0	0	0	0	0	0	0	0
67125	Tspan31	5	1	4	0.111111	0.363636	0	0	1	0	0	1	0	0	0	1	1	1	0	0	0	0	0	0	0	0	0
21402	Skp1a	5	2	3	0.222222	0.272727	0	0	1	1	0	0	0	0	0	1	0	1	1	0	0	0	0	0	0	0	0
17254	Slc3a2	5	1	4	0.111111	0.363636	0	0	1	0	0	1	0	0	1	1	0	0	0	1	0	0	0	0	0	0	0
20751	Spr	5	1	4	0.111111	0.363636	0	0	1	0	1	0	0	0	1	1	0	1	0	0	0	0	0	0	0	0	0
22017	Tpmt	5	2	3	0.222222	0.272727	0	0	1	1	0	0	0	0	1	1	0	1	0	0	0	0	0	0	0	0	0
22051	Trip6	5	2	3	0.222222	0.272727	0	0	1	1	0	1	0	0	1	0	0	1	0	0	0	0	0	0	0	0	0
69957	Cdc16	5	2	3	0.222222	0.272727	0	0	1	1	0	0	0	0	0	1	0	1	1	0	0	0	0	0	0	0	0
68481	Mpzl1	5	1	4	0.111111	0.363636	0	0	1	0	1	0	1	0	0	1	0	0	0	1	0	0	0	0	0	0	0
12702	Socs3	5	1	4	0.111111	0.363636	0	0	1	0	0	1	0	0	1	0	0	0	1	1	0	0	0	0	0	0	0
56382	Rab9	5	2	3	0.222222	0.272727	0	0	1	1	0	0	0	0	0	1	1	1	0	0	0	0	0	0	0	0	0
94275	Maged1	5	1	4	0.111111	0.363636	0	0	1	0	0	0	1	0	0	1	1	0	0	1	0	0	0	0	0	0	0
23908	Hs2st1	5	1	4	0.111111	0.363636	0	0	1	0	0	1	0	0	1	1	0	1	0	0	0	0	0	0	0	0	0
14155	Fem1b	5	2	3	0.222222	0.272727	0	0	1	1	0	1	0	0	1	0	0	0	1	0	0	0	0	0	0	0	0
14768	Lancl1	5	1	4	0.111111	0.363636	0	0	1	0	0	1	1	0	0	1	0	0	1	0	0	0	0	0	0	0	0
70350	Basp1	5	1	4	0.111111	0.363636	0	0	1	0	0	1	0	0	0	1	0	0	1	1	0	0	0	0	0	0	0
67040	Ddx17	5	1	4	0.111111	0.363636	0	0	1	0	0	1	0	0	1	1	1	0	0	0	0	0	0	0	0	0	0
14726	Pdpn	5	2	3	0.222222	0.272727	0	0	1	1	0	0	0	0	1	1	0	1	0	0	0	0	0	0	0	0	0
72599	Pdia5	5	1	4	0.111111	0.363636	0	0	1	0	1	0	0	0	1	1	0	1	0	0	0	0	0	0	0	0	0
16579	Kifap3	5	1	4	0.111111	0.363636	0	0	1	0	1	1	0	0	0	1	1	0	0	0	0	0	0	0	0	0	0
67811	Poldip2	5	2	3	0.222222	0.272727	0	0	1	1	0	0	0	0	1	1	0	1	0	0	0	0	0	0	0	0	0
69071	Tmem97	5	1	4	0.111111	0.363636	0	0	1	0	0	0	0	0	1	1	0	1	1	0	0	0	0	0	0	0	0
66155	Ufc1	5	2	3	0.222222	0.272727	0	0	1	1	0	0	0	0	0	1	0	1	1	0	0	0	0	0	0	0	0
28028	Mrpl50	5	2	3	0.222222	0.272727	0	0	1	1	0	0	0	0	0	1	0	1	1	0	0	0	0	0	0	0	0
58523	Elp2	5	2	3	0.222222	0.272727	0	0	1	1	0	1	0	0	0	0	0	1	1	0	0	0	0	0	0	0	0
66423	Coprs	5	2	3	0.222222	0.272727	0	0	1	1	0	1	0	0	0	1	0	1	0	0	0	0	0	0	0	0	0
23965	Tenm3	5	1	4	0.111111	0.363636	0	0	1	0	0	0	0	0	1	1	1	0	0	1	0	0	0	0	0	0	0
27397	Mrpl17	5	2	3	0.222222	0.272727	0	0	1	1	0	1	0	0	0	1	0	1	0	0	0	0	0	0	0	0	0
69482	Nup35	5	2	3	0.222222	0.272727	0	0	1	1	1	1	0	0	0	0	0	1	0	0	0	0	0	0	0	0	0
66768	Pacrgl	5	2	3	0.222222	0.272727	0	0	1	1	0	1	0	0	0	0	0	1	1	0	0	0	0	0	0	0	0
22640	Zfp1	5	1	4	0.111111	0.363636	0	0	1	0	1	1	0	0	0	1	0	0	0	1	0	0	0	0	0	0	0
71843	R3hcc1	5	1	4	0.111111	0.363636	0	0	1	0	0	0	0	0	1	1	0	1	1	0	0	0	0	0	0	0	0
19819	Rnaseh1	5	2	3	0.222222	0.272727	0	0	1	1	1	1	0	0	1	0	0	0	0	0	0	0	0	0	0	0	0
69663	Ddx51	5	2	3	0.222222	0.272727	0	0	1	1	1	1	0	0	0	0	0	0	1	0	0	0	0	0	0	0	0
11502	Adam9	5	1	4	0.111111	0.363636	0	0	0	1	0	1	0	0	1	1	0	1	0	0	0	0	0	0	0	0	0
12334	Capn2	5	1	4	0.111111	0.363636	0	0	0	1	0	0	0	0	1	0	1	1	0	1	0	0	0	0	0	0	0
12626	Cetn3	5	1	4	0.111111	0.363636	0	0	0	1	0	0	0	0	1	1	0	1	1	0	0	0	0	0	0	0	0
13730	Emp1	5	1	3	0.111111	0.272727	0	0	0	1	0	0	0	0	1	0	1	0	0	1	1	0	0	0	0	0	0
14455	Gas5	5	1	4	0.111111	0.363636	0	0	0	1	0	1	0	0	1	0	1	0	1	0	0	0	0	0	0	0	0
15182	Hdac2	5	2	3	0.222222	0.272727	0	0	0	1	0	0	0	0	1	0	0	1	1	0	0	0	0	0	0	0	1
15473	Hrsp12	5	1	4	0.111111	0.363636	0	0	0	1	0	1	1	0	0	0	0	1	0	1	0	0	0	0	0	0	0
15926	Idh1	5	1	4	0.111111	0.363636	0	0	0	1	0	0	0	0	1	0	1	1	1	0	0	0	0	0	0	0	0
16599	Klf3	5	2	3	0.222222	0.272727	0	0	0	1	0	1	0	0	1	0	0	0	1	0	0	0	0	0	1	0	0
17128	Smad4	5	2	3	0.222222	0.272727	0	0	0	1	0	1	0	0	1	0	1	0	0	0	0	0	0	0	0	0	1
18701	Pigf	5	1	4	0.111111	0.363636	0	0	0	1	0	1	0	0	1	0	0	1	1	0	0	0	0	0	0	0	0
19128	Pros1	5	1	3	0.111111	0.272727	0	0	0	1	0	0	0	0	1	0	1	1	0	0	1	0	0	0	0	0	0
20529	Slc31a1	5	1	4	0.111111	0.363636	0	0	0	1	0	1	0	0	1	0	0	1	1	0	0	0	0	0	0	0	0
20917	Suclg2	5	1	4	0.111111	0.363636	0	0	0	1	0	1	0	0	1	0	0	1	1	0	0	0	0	0	0	0	0
22612	Yes1	5	1	4	0.111111	0.363636	0	0	0	1	0	1	0	0	1	0	0	1	0	1	0	0	0	0	0	0	0
26360	Angptl2	5	1	4	0.111111	0.363636	0	0	0	1	0	1	0	0	1	0	1	0	1	0	0	0	0	0	0	0	0
29810	Bag3	5	1	4	0.111111	0.363636	0	0	0	1	0	1	0	0	1	0	1	0	0	1	0	0	0	0	0	0	0
29876	Clic4	5	1	4	0.111111	0.363636	0	0	0	1	0	0	1	0	0	0	0	1	1	1	0	0	0	0	0	0	0
50493	Txnrd1	5	1	4	0.111111	0.363636	0	0	0	1	0	1	0	0	1	0	0	1	1	0	0	0	0	0	0	0	0
50850	Spast	5	1	4	0.111111	0.363636	0	0	0	1	1	0	0	0	1	0	0	1	1	0	0	0	0	0	0	0	0
53382	Txnl1	5	1	4	0.111111	0.363636	0	0	0	1	1	1	0	0	0	0	0	1	1	0	0	0	0	0	0	0	0
55988	Snx12	5	1	4	0.111111	0.363636	0	0	0	1	0	1	0	0	1	0	0	1	1	0	0	0	0	0	0	0	0
56044	Rala	5	1	4	0.111111	0.363636	0	0	0	1	0	0	0	0	1	1	0	1	1	0	0	0	0	0	0	0	0
56550	Ube2d2a	5	1	4	0.111111	0.363636	0	0	0	1	0	1	0	0	1	0	0	1	1	0	0	0	0	0	0	0	0
60532	Wtap	5	1	4	0.111111	0.363636	0	0	0	1	0	1	0	0	1	0	0	1	1	0	0	0	0	0	0	0	0
66120	Fkbp11	5	1	4	0.111111	0.363636	0	0	0	1	1	1	0	0	1	0	0	1	0	0	0	0	0	0	0	0	0
67053	Rpp14	5	1	4	0.111111	0.363636	0	0	0	1	0	1	0	0	1	0	0	1	1	0	0	0	0	0	0	0	0
71853	Pdia6	5	2	3	0.222222	0.272727	0	0	0	1	0	0	0	0	0	0	1	1	1	0	0	0	0	0	1	0	0
72084	Pigx	5	1	4	0.111111	0.363636	0	0	0	1	0	1	0	0	1	0	0	1	1	0	0	0	0	0	0	0	0
11350	Abl1	5	1	4	0.111111	0.363636	0	0	0	0	1	0	0	0	1	0	0	0	1	1	0	0	0	1	0	0	0
12827	Col4a2	5	0	5	0	0.454545	0	0	0	0	1	1	0	0	0	0	1	0	1	1	0	0	0	0	0	0	0
14862	Gstm1	5	0	4	0	0.363636	0	0	0	0	1	1	0	0	1	1	0	0	0	0	1	0	0	0	0	0	0
15370	Nr4a1	5	0	5	0	0.454545	0	0	0	0	1	1	0	0	0	1	1	0	0	1	0	0	0	0	0	0	0
16918	Mycl	5	0	5	0	0.454545	0	0	0	0	1	0	0	1	1	1	0	0	1	0	0	0	0	0	0	0	0
319757	Smo	5	1	4	0.111111	0.363636	0	0	0	0	1	0	1	1	0	1	0	0	0	0	0	0	0	0	0	0	1
21413	Tcf4	5	0	5	0	0.454545	0	0	0	0	1	0	0	0	1	1	1	0	0	1	0	0	0	0	0	0	0
19240	Tmsb10	5	0	5	0	0.454545	0	0	0	0	1	0	0	0	1	1	0	1	1	0	0	0	0	0	0	0	0
16568	Kif3a	5	0	5	0	0.454545	0	0	0	0	1	0	0	1	0	1	1	0	1	0	0	0	0	0	0	0	0
14231	Fkbp7	5	0	5	0	0.454545	0	0	0	0	1	1	0	0	0	1	1	0	0	1	0	0	0	0	0	0	0
68559	Pdrg1	5	0	5	0	0.454545	0	0	0	0	1	1	0	0	1	1	0	0	0	1	0	0	0	0	0	0	0
77605	H2afv	5	0	5	0	0.454545	0	0	0	0	1	0	0	0	1	1	1	0	1	0	0	0	0	0	0	0	0
67513	2610002J02Rik	5	0	5	0	0.454545	0	0	0	0	1	1	0	0	1	1	0	0	1	0	0	0	0	0	0	0	0
12364	Casp12	5	0	5	0	0.454545	0	0	0	0	1	1	1	0	0	0	1	0	0	1	0	0	0	0	0	0	0
12367	Casp3	5	1	4	0.111111	0.363636	0	0	0	0	0	1	0	0	1	0	0	1	1	0	0	0	0	0	0	0	1
14886	Gtf2i	5	0	5	0	0.454545	0	0	0	0	0	1	1	0	1	0	1	1	0	0	0	0	0	0	0	0	0
16476	Jun	5	0	5	0	0.454545	0	0	0	0	0	1	0	1	1	0	1	0	0	1	0	0	0	0	0	0	0
16592	Fabp5	5	0	5	0	0.454545	0	0	0	0	0	1	0	1	1	0	1	0	1	0	0	0	0	0	0	0	0
16978	Lrrfip1	5	0	5	0	0.454545	0	0	0	0	0	1	0	0	1	0	0	1	1	1	0	0	0	0	0	0	0
17304	Mfge8	5	0	5	0	0.454545	0	0	0	0	0	1	1	0	1	1	0	0	0	1	0	0	0	0	0	0	0
18571	Pdcd6ip	5	0	5	0	0.454545	0	0	0	0	0	1	0	0	1	0	1	1	1	0	0	0	0	0	0	0	0
18767	Pkia	5	0	5	0	0.454545	0	0	0	0	0	1	0	1	0	1	0	1	0	1	0	0	0	0	0	0	0
19414	Rasa3	5	0	5	0	0.454545	0	0	0	0	0	1	1	0	1	0	1	1	0	0	0	0	0	0	0	0	0
20392	Sgce	5	0	5	0	0.454545	0	0	0	0	0	1	0	0	0	1	1	0	1	1	0	0	0	0	0	0	0
21417	Zeb1	5	0	5	0	0.454545	0	0	0	0	0	1	0	0	1	1	0	1	0	1	0	0	0	0	0	0	0
21885	Tle1	5	0	5	0	0.454545	0	0	0	0	0	1	0	0	1	0	1	0	1	1	0	0	0	0	0	0	0
56278	Gkap1	5	0	5	0	0.454545	0	0	0	0	0	1	1	0	1	0	0	0	1	1	0	0	0	0	0	0	0
66141	Ifitm3	5	0	4	0	0.363636	0	0	0	0	0	1	1	0	1	0	0	0	0	1	1	0	0	0	0	0	0
67245	Peli1	5	0	5	0	0.454545	0	0	0	0	0	1	0	0	1	0	1	1	1	0	0	0	0	0	0	0	0
67299	Dock7	5	0	5	0	0.454545	0	0	0	0	0	1	0	0	1	0	1	1	0	1	0	0	0	0	0	0	0
72900	Ndufv2	5	0	5	0	0.454545	0	0	0	0	0	1	0	0	0	1	1	1	1	0	0	0	0	0	0	0	0
80884	Maged2	5	0	5	0	0.454545	0	0	0	0	0	1	0	0	1	1	0	1	1	0	0	0	0	0	0	0	0
16367	Irs1	5	1	3	0.111111	0.272727	0	0	0	0	0	0	1	0	1	1	0	0	0	0	1	0	0	0	0	0	1
19280	Ptprs	5	1	4	0.111111	0.363636	0	0	0	0	0	0	1	0	1	0	1	0	1	0	0	0	0	0	0	0	1
71994	Cnn3	5	0	5	0	0.454545	0	0	0	0	0	0	1	0	1	0	0	1	1	1	0	0	0	0	0	0	0
14451	Gas1	5	0	5	0	0.454545	0	0	0	0	0	0	0	1	1	1	1	1	0	0	0	0	0	0	0	0	0
12305	Ddr1	5	0	5	0	0.454545	0	0	0	0	0	0	0	1	1	1	0	1	1	0	0	0	0	0	0	0	0
16852	Lgals1	5	0	5	0	0.454545	0	0	0	0	0	0	0	0	1	1	0	1	1	1	0	0	0	0	0	0	0
66923	Pbrm1	5	1	4	0.111111	0.363636	0	0	0	0	0	0	0	0	1	0	1	1	1	0	0	0	0	0	0	0	1
11601	Angpt2	4	0	4	0	0.363636	0	0	0	0	0	0	1	0	1	0	0	1	0	0	0	0	0	0	0	1	0
11651	Akt1	4	1	3	0.111111	0.272727	0	0	0	0	0	0	0	0	0	0	0	1	1	0	0	0	0	0	0	1	1
11816	Apoe	4	1	3	0.111111	0.272727	1	0	0	0	0	1	0	0	0	0	0	0	0	1	0	0	0	0	0	1	0
12359	Cat	4	0	4	0	0.363636	0	0	0	0	0	0	0	0	1	1	0	1	0	0	0	0	0	0	0	1	0
12388	Ctnnd1	4	0	4	0	0.363636	0	0	0	0	1	0	0	0	1	0	0	0	1	0	0	0	0	0	0	1	0
12444	Ccnd2	4	0	4	0	0.363636	0	0	0	0	0	0	0	1	0	0	1	0	1	0	0	0	0	0	0	1	0
12447	Ccne1	4	2	2	0.222222	0.181818	1	0	0	1	0	0	0	0	1	0	0	0	0	0	0	0	0	0	0	1	0
12540	Cdc42	4	0	4	0	0.363636	0	0	0	0	0	0	0	0	1	0	0	1	1	0	0	0	0	0	0	1	0
12558	Cdh2	4	0	4	0	0.363636	0	0	0	0	0	0	0	0	1	0	0	1	0	1	0	0	0	0	0	1	0
12579	Cdkn2b	4	1	3	0.111111	0.272727	0	0	0	1	0	0	0	0	1	0	0	1	0	0	0	0	0	0	0	1	0
14255	Flt3	4	0	4	0	0.363636	0	0	0	0	1	1	0	0	0	0	0	0	0	1	0	0	0	0	0	1	0
14461	Gata2	4	1	3	0.111111	0.272727	1	0	0	0	0	1	0	0	0	0	0	0	0	1	0	0	0	0	0	1	0
14462	Gata3	4	1	3	0.111111	0.272727	1	0	0	0	0	1	0	0	0	0	0	0	0	1	0	0	0	0	0	1	0
14632	Gli1	4	2	2	0.222222	0.181818	1	1	0	0	0	0	0	0	0	0	0	0	1	0	0	0	0	0	0	1	0
15208	Hes5	4	0	4	0	0.363636	0	0	0	0	0	0	0	1	1	0	0	0	1	0	0	0	0	0	0	1	0
15251	Hif1a	4	2	2	0.222222	0.181818	0	0	0	1	0	0	0	0	0	0	0	1	0	0	0	0	0	0	0	1	1
15402	Hoxa5	4	0	4	0	0.363636	0	0	0	0	1	1	0	0	0	0	0	0	0	1	0	0	0	0	0	1	0
15405	Hoxa9	4	0	4	0	0.363636	0	0	0	0	1	1	0	0	0	0	0	0	0	1	0	0	0	0	0	1	0
16002	Igf2	4	2	2	0.222222	0.181818	1	0	0	1	0	0	0	0	0	0	0	0	1	0	0	0	0	0	0	1	0
16452	Jak2	4	0	4	0	0.363636	0	0	0	0	0	1	0	1	0	0	1	0	0	0	0	0	0	0	0	1	0
16590	Kit	4	0	4	0	0.363636	0	0	0	0	0	1	0	0	0	0	0	0	1	1	0	0	0	0	0	1	0
16842	Lef1	4	2	2	0.222222	0.181818	1	0	0	0	0	0	0	0	0	0	0	0	1	0	0	0	0	0	0	1	1
17127	Smad3	4	2	2	0.222222	0.181818	0	0	0	1	0	0	0	0	0	0	0	1	0	0	0	0	0	0	0	1	1
17210	Mcl1	4	1	3	0.111111	0.272727	1	0	0	0	0	0	0	0	0	0	1	0	1	0	0	0	0	0	0	1	0
17268	Meis1	4	0	4	0	0.363636	0	0	0	0	0	1	0	0	0	0	0	1	0	1	0	0	0	0	0	1	0
17295	Met	4	1	3	0.111111	0.272727	0	0	0	0	1	0	0	0	1	0	0	0	0	0	0	0	0	1	0	1	0
17311	Kitl	4	0	4	0	0.363636	0	0	0	0	0	0	0	1	0	0	0	1	0	1	0	0	0	0	0	1	0
17698	Msn	4	0	4	0	0.363636	0	0	0	0	0	0	0	0	1	0	0	1	0	1	0	0	0	0	0	1	0
18655	Pgk1	4	1	3	0.111111	0.272727	0	0	0	1	0	0	0	0	1	0	0	1	0	0	0	0	0	0	0	1	0
20306	Ccl7	4	1	2	0.111111	0.181818	0	0	0	1	0	0	0	0	0	0	0	0	0	1	1	0	0	0	0	1	0
20377	Sfrp1	4	0	4	0	0.363636	0	0	0	0	0	0	0	0	1	0	0	0	1	1	0	0	0	0	0	1	0
20750	Spp1	4	3	1	0.333333	0.0909091	1	0	0	1	0	0	0	0	0	0	0	0	0	0	0	0	0	0	0	1	1
20893	Bhlhe40	4	0	4	0	0.363636	0	0	0	0	1	0	0	0	0	1	0	0	0	1	0	0	0	0	0	1	0
21667	Tdgf1	4	3	1	0.333333	0.0909091	1	0	1	1	0	0	0	0	0	0	0	0	0	0	0	0	0	0	0	1	0
21687	Tek	4	0	4	0	0.363636	0	0	0	0	1	1	0	0	0	0	0	0	0	1	0	0	0	0	0	1	0
21859	Timp3	4	0	4	0	0.363636	0	0	0	0	0	1	0	0	0	0	1	0	0	1	0	0	0	0	0	1	0
26416	Mapk14	4	2	2	0.222222	0.181818	1	0	0	0	0	1	0	0	0	0	0	0	0	0	0	0	1	0	0	1	0
50706	Postn	4	1	3	0.111111	0.272727	0	0	0	1	0	0	0	0	0	0	1	0	0	1	0	0	0	0	0	1	0
72508	Rps6kb1	4	2	2	0.222222	0.181818	0	0	0	1	0	0	0	0	0	0	0	1	0	0	0	0	0	0	1	1	0
66899	Fip1l1	4	2	2	0.222222	0.181818	0	0	0	0	0	0	0	0	0	0	1	1	0	0	0	1	1	0	0	0	0
51812	Mcrs1	4	2	2	0.222222	0.181818	0	0	0	0	0	1	0	0	1	0	0	0	0	0	0	1	1	0	0	0	0
54451	Cpsf3	4	4	0	0.444444	0	1	0	0	1	0	0	0	0	0	0	0	0	0	0	0	1	1	0	0	0	0
11789	Apc	4	3	1	0.333333	0.0909091	0	0	0	0	0	0	0	0	0	0	0	1	0	0	0	1	1	0	0	0	1
60441	Mrpl38	4	2	2	0.222222	0.181818	0	0	1	0	1	0	0	0	0	1	0	0	0	0	0	1	0	0	0	0	0
18044	Nfya	4	1	3	0.111111	0.272727	0	0	0	0	0	1	0	0	1	0	0	0	1	0	0	1	0	0	0	0	0
21827	Thbs3	4	1	3	0.111111	0.272727	0	0	0	0	0	0	0	0	1	0	0	1	1	0	0	1	0	0	0	0	0
20848	Stat3	4	3	1	0.333333	0.0909091	0	0	0	0	0	0	0	0	0	0	1	0	0	0	0	1	0	0	1	0	1
59054	Mrps30	4	2	2	0.222222	0.181818	0	0	1	0	1	0	0	0	0	1	0	0	0	0	0	1	0	0	0	0	0
68477	Rmnd5a	4	3	1	0.333333	0.0909091	0	0	1	0	0	0	0	0	0	0	1	0	0	0	0	1	1	0	0	0	0
67963	Npc2	4	1	3	0.111111	0.272727	0	0	0	0	0	0	0	0	1	0	1	0	1	0	0	1	0	0	0	0	0
56213	Htra1	4	2	2	0.222222	0.181818	0	0	1	0	0	0	0	0	0	1	0	0	0	1	0	1	0	0	0	0	0
11443	Chrnb1	4	1	3	0.111111	0.272727	1	0	0	0	1	1	0	0	0	0	0	0	0	1	0	0	0	0	0	0	0
11545	Parp1	4	3	1	0.333333	0.0909091	1	0	0	1	0	0	0	0	0	0	0	0	1	0	0	0	0	0	0	0	1
11546	Parp2	4	1	3	0.111111	0.272727	1	0	0	0	0	1	0	0	1	0	0	0	1	0	0	0	0	0	0	0	0
11566	Adss	4	2	2	0.222222	0.181818	1	0	0	1	0	0	0	0	0	0	0	1	1	0	0	0	0	0	0	0	0
11908	Atf1	4	2	2	0.222222	0.181818	1	0	0	1	0	0	0	0	0	0	0	1	1	0	0	0	0	0	0	0	0
11989	Slc7a3	4	4	0	0.444444	0	1	1	1	1	0	0	0	0	0	0	0	0	0	0	0	0	0	0	0	0	0
12036	Bcat2	4	3	1	0.333333	0.0909091	1	1	0	1	0	0	0	0	0	0	0	0	1	0	0	0	0	0	0	0	0
12228	Btg3	4	1	3	0.111111	0.272727	1	0	0	0	0	1	0	0	0	0	0	0	1	1	0	0	0	0	0	0	0
12301	Cacybp	4	3	1	0.333333	0.0909091	1	0	1	1	0	0	0	0	0	0	0	1	0	0	0	0	0	0	0	0	0
12419	Cbx5	4	1	3	0.111111	0.272727	1	0	0	0	0	0	0	0	1	0	0	1	1	0	0	0	0	0	0	0	0
12450	Ccng1	4	2	2	0.222222	0.181818	1	0	0	1	0	0	0	0	1	0	0	1	0	0	0	0	0	0	0	0	0
12469	Cct8	4	2	2	0.222222	0.181818	1	0	0	1	0	0	0	0	0	0	0	1	1	0	0	0	0	0	0	0	0
12476	Cd151	4	1	3	0.111111	0.272727	1	0	0	0	0	1	0	0	1	1	0	0	0	0	0	0	0	0	0	0	0
12484	Cd24a	4	1	3	0.111111	0.272727	1	0	0	0	0	0	0	0	1	0	0	1	1	0	0	0	0	0	0	0	0
12615	Cenpa	4	1	3	0.111111	0.272727	1	0	0	0	0	0	0	0	1	0	0	1	1	0	0	0	0	0	0	0	0
12785	Cnbp	4	2	2	0.222222	0.181818	1	0	0	1	0	0	0	0	0	0	0	1	1	0	0	0	0	0	0	0	0
12819	Col15a1	4	2	1	0.222222	0.0909091	1	0	0	1	0	0	0	0	1	0	0	0	0	0	1	0	0	0	0	0	0
13178	Dck	4	1	3	0.111111	0.272727	1	0	0	0	0	0	0	0	1	0	0	1	1	0	0	0	0	0	0	0	0
13197	Gadd45a	4	3	1	0.333333	0.0909091	1	0	0	1	0	0	0	0	0	0	0	0	1	0	0	0	0	0	0	0	1
13411	Dnah11	4	1	3	0.111111	0.272727	1	0	0	0	0	0	0	0	1	0	0	1	1	0	0	0	0	0	0	0	0
13559	E2f5	4	1	3	0.111111	0.272727	1	0	0	0	0	1	0	0	0	0	0	1	1	0	0	0	0	0	0	0	0
13605	Ect2	4	2	2	0.222222	0.181818	1	0	0	1	0	0	0	0	0	0	0	1	1	0	0	0	0	0	0	0	0
13664	Eif1a	4	2	2	0.222222	0.181818	1	0	0	1	0	0	0	0	0	0	0	1	1	0	0	0	0	0	0	0	0
13682	Eif4a2	4	2	2	0.222222	0.181818	1	0	0	1	0	1	0	0	0	0	1	0	0	0	0	0	0	0	0	0	0
13836	Epha2	4	3	1	0.333333	0.0909091	1	0	1	1	0	0	0	0	0	0	0	0	1	0	0	0	0	0	0	0	0
13874	Ereg	4	3	1	0.333333	0.0909091	1	0	1	1	1	0	0	0	0	0	0	0	0	0	0	0	0	0	0	0	0
14004	Chchd2	4	1	3	0.111111	0.272727	1	0	0	0	0	1	0	0	1	0	0	1	0	0	0	0	0	0	0	0	0
14030	Ewsr1	4	2	2	0.222222	0.181818	1	0	0	0	0	0	0	0	1	0	0	0	1	0	0	0	0	0	0	0	1
14121	Fbp1	4	1	3	0.111111	0.272727	1	0	0	0	0	1	0	0	0	0	1	1	0	0	0	0	0	0	0	0	0
14208	Ppm1g	4	2	2	0.222222	0.181818	1	0	1	0	0	0	0	0	0	0	0	1	1	0	0	0	0	0	0	0	0
14235	Foxm1	4	1	3	0.111111	0.272727	1	0	0	0	0	0	0	0	1	0	0	1	1	0	0	0	0	0	0	0	0
14359	Fxr1	4	2	2	0.222222	0.181818	1	0	0	1	0	0	0	0	0	0	1	1	0	0	0	0	0	0	0	0	0
14375	Xrcc6	4	1	3	0.111111	0.272727	1	0	0	0	0	0	0	0	1	0	0	1	1	0	0	0	0	0	0	0	0
14601	Ghrh	4	2	2	0.222222	0.181818	1	0	0	1	0	0	0	0	0	0	0	1	1	0	0	0	0	0	0	0	0
14620	Gjb3	4	3	1	0.333333	0.0909091	1	0	1	1	0	1	0	0	0	0	0	0	0	0	0	0	0	0	0	0	0
14663	Glycam1	4	2	2	0.222222	0.181818	1	0	0	1	0	1	0	0	1	0	0	0	0	0	0	0	0	0	0	0	0
14782	Gsr	4	2	2	0.222222	0.181818	1	0	0	1	0	0	0	0	0	0	0	1	1	0	0	0	0	0	0	0	0
14791	Emg1	4	2	2	0.222222	0.181818	1	0	0	1	0	0	0	0	0	0	0	1	1	0	0	0	0	0	0	0	0
14793	Cdca3	4	1	3	0.111111	0.272727	1	0	0	0	0	0	0	0	1	0	0	1	1	0	0	0	0	0	0	0	0
14841	Gsg2	4	2	2	0.222222	0.181818	1	0	0	0	0	0	0	0	0	0	0	1	1	0	0	0	0	1	0	0	0
14976	Pfdn6	4	2	2	0.222222	0.181818	1	0	1	0	0	1	0	0	0	0	0	0	1	0	0	0	0	0	0	0	0
15107	Hadh	4	1	3	0.111111	0.272727	1	0	0	0	0	0	0	0	0	0	1	1	1	0	0	0	0	0	0	0	0
15191	Hdgf	4	2	2	0.222222	0.181818	1	0	0	1	0	0	0	0	1	0	0	0	1	0	0	0	0	0	0	0	0
15270	H2afx	4	1	3	0.111111	0.272727	1	0	0	0	0	0	0	0	1	0	0	1	1	0	0	0	0	0	0	0	0
15382	Hnrnpa1	4	1	3	0.111111	0.272727	1	0	0	0	0	0	0	0	1	0	0	1	1	0	0	0	0	0	0	0	0
15384	Hnrnpab	4	2	2	0.222222	0.181818	1	0	0	1	0	0	0	0	0	0	0	1	1	0	0	0	0	0	0	0	0
15387	Hnrnpk	4	2	2	0.222222	0.181818	1	0	0	1	0	0	0	0	1	0	0	1	0	0	0	0	0	0	0	0	0
15463	Agfg1	4	2	2	0.222222	0.181818	1	0	0	1	0	0	0	0	0	0	0	1	1	0	0	0	0	0	0	0	0
15484	Hsd11b2	4	2	2	0.222222	0.181818	1	0	0	1	1	0	0	0	0	0	0	0	1	0	0	0	0	0	0	0	0
15516	Hsp90ab1	4	2	2	0.222222	0.181818	1	0	1	0	0	0	0	0	1	0	0	0	1	0	0	0	0	0	0	0	0
15587	Hyal2	4	1	3	0.111111	0.272727	1	0	0	0	0	0	0	0	1	0	0	1	1	0	0	0	0	0	0	0	0
15929	Idh3g	4	2	2	0.222222	0.181818	1	0	1	0	0	0	0	0	0	1	0	1	0	0	0	0	0	0	0	0	0
16201	Ilf3	4	2	2	0.222222	0.181818	1	0	0	1	0	0	1	0	1	0	0	0	0	0	0	0	0	0	0	0	0
16341	Eif3e	4	2	2	0.222222	0.181818	1	0	0	1	0	0	0	0	0	0	1	1	0	0	0	0	0	0	0	0	0
16468	Jarid2	4	4	0	0.444444	0	1	1	1	0	0	0	0	0	0	0	0	0	0	0	0	0	0	0	0	0	1
16668	Krt18	4	1	2	0.111111	0.181818	1	0	0	0	1	1	0	0	0	0	0	0	0	0	1	0	0	0	0	0	0
16776	Lama5	4	2	2	0.222222	0.181818	1	0	0	1	0	0	0	0	1	0	0	1	0	0	0	0	0	0	0	0	0
16881	Lig1	4	1	3	0.111111	0.272727	1	0	0	0	0	0	0	0	1	0	0	1	1	0	0	0	0	0	0	0	0
17149	Magoh	4	3	1	0.333333	0.0909091	1	0	1	1	0	0	0	0	0	0	0	0	1	0	0	0	0	0	0	0	0
17169	Mark3	4	1	3	0.111111	0.272727	1	0	0	0	0	0	0	0	1	0	0	1	1	0	0	0	0	0	0	0	0
17240	Mdfi	4	2	2	0.222222	0.181818	1	0	0	1	0	1	0	0	0	0	0	1	0	0	0	0	0	0	0	0	0
17535	Mre11a	4	2	2	0.222222	0.181818	1	0	0	1	0	0	0	0	1	0	0	0	1	0	0	0	0	0	0	0	0
17714	Grpel2	4	2	2	0.222222	0.181818	1	0	0	1	0	0	0	0	0	0	0	1	1	0	0	0	0	0	0	0	0
18074	Nid2	4	3	1	0.333333	0.0909091	1	0	1	1	0	0	0	0	0	0	0	0	0	1	0	0	0	0	0	0	0
18117	Emc8	4	2	2	0.222222	0.181818	1	0	0	1	0	0	0	0	1	0	0	1	0	0	0	0	0	0	0	0	0
18119	Nodal	4	4	0	0.444444	0	1	0	1	1	0	0	0	0	0	0	0	0	0	0	0	0	0	0	0	0	1
18176	Nras	4	1	3	0.111111	0.272727	1	0	0	0	0	0	0	0	1	0	0	1	1	0	0	0	0	0	0	0	0
18392	Orc1	4	2	2	0.222222	0.181818	1	0	0	1	0	0	0	0	0	0	0	1	1	0	0	0	0	0	0	0	0
18541	Pcnt	4	2	2	0.222222	0.181818	1	0	0	1	0	0	0	0	0	0	0	1	1	0	0	0	0	0	0	0	0
18777	Lypla1	4	2	2	0.222222	0.181818	1	0	0	1	0	0	0	0	0	0	0	1	1	0	0	0	0	0	0	0	0
18786	Plaa	4	2	2	0.222222	0.181818	1	0	0	1	0	0	0	0	0	0	0	1	1	0	0	0	0	0	0	0	0
18858	Pmp22	4	1	3	0.111111	0.272727	1	0	0	0	0	0	0	0	0	1	1	0	0	1	0	0	0	0	0	0	0
18968	Pola1	4	2	2	0.222222	0.181818	1	0	1	0	0	0	0	0	0	0	0	1	1	0	0	0	0	0	0	0	0
18969	Pola2	4	2	2	0.222222	0.181818	1	0	0	1	0	0	1	0	0	0	0	0	1	0	0	0	0	0	0	0	0
18971	Pold1	4	1	3	0.111111	0.272727	1	0	0	0	0	0	0	0	1	0	0	1	1	0	0	0	0	0	0	0	0
18975	Polg	4	1	3	0.111111	0.272727	1	0	0	0	0	1	0	0	1	0	0	1	0	0	0	0	0	0	0	0	0
19069	Nup88	4	2	2	0.222222	0.181818	1	0	0	1	0	0	0	0	0	0	0	1	1	0	0	0	0	0	0	0	0
19090	Prkdc	4	1	3	0.111111	0.272727	1	0	0	0	1	1	0	0	0	0	0	0	1	0	0	0	0	0	0	0	0
19186	Psme1	4	1	3	0.111111	0.272727	1	0	0	0	0	1	0	0	1	0	1	0	0	0	0	0	0	0	0	0	0
19207	Ptch2	4	2	2	0.222222	0.181818	1	0	0	1	0	0	0	1	0	0	0	0	1	0	0	0	0	0	0	0	0
19255	Ptpn2	4	2	2	0.222222	0.181818	1	0	0	1	0	1	0	0	0	0	0	1	0	0	0	0	0	0	0	0	0
19294	Pvrl2	4	2	2	0.222222	0.181818	1	0	1	0	0	0	0	0	1	0	0	0	1	0	0	0	0	0	0	0	0
19361	Rad51	4	2	2	0.222222	0.181818	1	0	0	1	0	0	0	0	1	0	0	1	0	0	0	0	0	0	0	0	0
19385	Ranbp1	4	2	2	0.222222	0.181818	1	0	0	1	0	0	0	0	0	0	0	1	1	0	0	0	0	0	0	0	0
20019	Polr1a	4	1	3	0.111111	0.272727	1	0	0	0	0	0	1	0	1	0	0	1	0	0	0	0	0	0	0	0	0
20068	Rps17	4	1	3	0.111111	0.272727	1	0	0	0	0	1	0	0	0	0	1	0	1	0	0	0	0	0	0	0	0
20474	Six4	4	2	2	0.222222	0.181818	1	0	0	1	0	0	0	0	1	0	0	0	1	0	0	0	0	0	0	0	0
20492	Slbp	4	1	3	0.111111	0.272727	1	0	0	0	0	0	0	0	1	0	0	1	1	0	0	0	0	0	0	0	0
20639	Snrpb2	4	2	2	0.222222	0.181818	1	0	0	1	1	0	0	0	0	0	0	1	0	0	0	0	0	0	0	0	0
20867	Stip1	4	2	2	0.222222	0.181818	1	0	0	1	0	0	0	0	0	0	0	1	1	0	0	0	0	0	0	0	0
21379	Tbrg4	4	2	2	0.222222	0.181818	1	0	0	1	0	1	0	0	0	0	0	1	0	0	0	0	0	0	0	0	0
21407	Tcf15	4	3	1	0.333333	0.0909091	1	1	1	0	0	1	0	0	0	0	0	0	0	0	0	0	0	0	0	0	0
21415	Tcf7l1	4	2	2	0.222222	0.181818	1	0	0	1	0	0	0	0	1	0	0	0	1	0	0	0	0	0	0	0	0
21453	Tcof1	4	2	2	0.222222	0.181818	1	0	0	1	0	0	0	0	1	0	0	0	1	0	0	0	0	0	0	0	0
21665	Tdg	4	1	3	0.111111	0.272727	1	0	0	0	0	0	0	0	1	0	0	1	1	0	0	0	0	0	0	0	0
21681	Alyref	4	2	2	0.222222	0.181818	1	0	1	0	0	0	0	0	0	0	0	1	1	0	0	0	0	0	0	0	0
21781	Tfdp1	4	2	2	0.222222	0.181818	1	0	0	1	0	0	0	0	0	0	0	1	1	0	0	0	0	0	0	0	0
21854	Timm17a	4	3	1	0.333333	0.0909091	1	0	1	1	0	0	0	0	0	1	0	0	0	0	0	0	0	0	0	0	0
21917	Tmpo	4	1	3	0.111111	0.272727	1	0	0	0	0	0	0	0	1	0	0	1	1	0	0	0	0	0	0	0	0
22019	Tpp2	4	2	2	0.222222	0.181818	1	0	0	1	0	1	0	0	0	0	0	1	0	0	0	0	0	0	0	0	0
22113	Phlda2	4	2	2	0.222222	0.181818	1	0	0	1	0	1	0	0	0	0	0	0	0	1	0	0	0	0	0	0	0
22171	Tyms	4	1	3	0.111111	0.272727	1	0	0	0	0	0	0	0	1	0	0	1	1	0	0	0	0	0	0	0	0
22224	Usp10	4	2	2	0.222222	0.181818	1	0	0	1	0	1	0	0	0	0	0	1	0	0	0	0	0	0	0	0	0
22286	Utf1	4	4	0	0.444444	0	1	0	1	1	0	0	0	0	0	0	0	0	0	0	0	0	0	0	0	0	1
22288	Utrn	4	2	2	0.222222	0.181818	1	0	0	1	0	0	1	0	0	0	1	0	0	0	0	0	0	0	0	0	0
22321	Vars	4	1	3	0.111111	0.272727	1	0	0	0	0	0	0	0	1	0	0	1	1	0	0	0	0	0	0	0	0
22367	Vrk1	4	1	3	0.111111	0.272727	1	0	0	0	0	0	0	0	1	0	0	1	1	0	0	0	0	0	0	0	0
22673	Zfp185	4	3	1	0.333333	0.0909091	1	0	1	1	0	0	0	0	0	1	0	0	0	0	0	0	0	0	0	0	0
22702	Zfp42	4	4	0	0.444444	0	1	1	0	1	0	0	0	0	0	0	0	0	0	0	0	0	0	0	0	0	1
22712	Zfp54	4	2	2	0.222222	0.181818	1	0	0	1	0	1	0	0	0	0	0	1	0	0	0	0	0	0	0	0	0
22722	Zfp64	4	2	2	0.222222	0.181818	1	0	1	0	0	1	0	0	0	1	0	0	0	0	0	0	0	0	0	0	0
23837	Cfdp1	4	2	2	0.222222	0.181818	1	0	0	1	0	0	0	0	0	0	0	1	1	0	0	0	0	0	0	0	0
23983	Pcbp1	4	2	2	0.222222	0.181818	1	0	0	0	0	0	0	0	1	0	0	0	1	0	0	0	1	0	0	0	0
23997	Psmd13	4	2	2	0.222222	0.181818	1	0	1	0	0	0	0	0	0	0	0	1	1	0	0	0	0	0	0	0	0
26440	Psma1	4	2	2	0.222222	0.181818	1	0	0	1	0	0	0	0	0	0	0	1	1	0	0	0	0	0	0	0	0
26442	Psma5	4	2	2	0.222222	0.181818	1	0	0	1	0	0	0	0	0	0	0	1	1	0	0	0	0	0	0	0	0
26443	Psma6	4	2	2	0.222222	0.181818	1	0	0	1	0	0	0	0	0	0	0	1	1	0	0	0	0	0	0	0	0
26444	Psma7	4	2	2	0.222222	0.181818	1	0	0	1	0	0	0	0	0	0	0	1	1	0	0	0	0	0	0	0	0
26446	Psmb3	4	2	2	0.222222	0.181818	1	0	0	1	0	0	0	0	0	0	0	1	1	0	0	0	0	0	0	0	0
26885	Casp8ap2	4	2	2	0.222222	0.181818	1	0	0	1	0	0	0	0	0	0	0	1	1	0	0	0	0	0	0	0	0
26909	Exo1	4	2	2	0.222222	0.181818	1	0	0	1	0	0	0	0	0	0	0	1	1	0	0	0	0	0	0	0	0
26941	Slc9a3r1	4	1	2	0.111111	0.181818	1	0	0	0	0	0	0	0	1	0	1	0	0	0	1	0	0	0	0	0	0
26992	Brd7	4	2	2	0.222222	0.181818	1	0	1	0	0	0	0	0	0	0	0	1	1	0	0	0	0	0	0	0	0
27364	Srr	4	2	2	0.222222	0.181818	1	0	0	1	0	0	0	0	0	0	0	1	1	0	0	0	0	0	0	0	0
27632	Nelfe	4	2	2	0.222222	0.181818	1	0	0	1	0	0	0	0	1	0	0	0	1	0	0	0	0	0	0	0	0
27998	Exosc5	4	3	1	0.333333	0.0909091	1	0	1	1	0	0	0	0	0	0	0	0	1	0	0	0	0	0	0	0	0
28114	Nsun2	4	2	2	0.222222	0.181818	1	0	0	1	0	0	0	0	0	0	0	1	1	0	0	0	0	0	0	0	0
29858	Pmm1	4	2	2	0.222222	0.181818	1	0	1	0	0	0	0	0	0	1	0	1	0	0	0	0	0	0	0	0	0
30058	Timm8a1	4	2	2	0.222222	0.181818	1	0	0	1	0	0	0	0	0	0	0	1	1	0	0	0	0	0	0	0	0
30926	Glrx3	4	2	2	0.222222	0.181818	1	0	0	1	0	0	0	0	0	0	0	1	1	0	0	0	0	0	0	0	0
50497	Hspa14	4	3	1	0.333333	0.0909091	1	0	1	1	0	0	0	0	0	0	0	1	0	0	0	0	0	0	0	0	0
50772	Mapk6	4	2	2	0.222222	0.181818	1	0	0	1	0	0	0	0	0	0	0	1	1	0	0	0	0	0	0	0	0
50783	Lsm4	4	1	3	0.111111	0.272727	1	0	0	0	0	0	0	0	1	0	0	1	1	0	0	0	0	0	0	0	0
50926	Hnrnpdl	4	1	3	0.111111	0.272727	1	0	0	0	0	0	0	0	1	0	0	1	1	0	0	0	0	0	0	0	0
51788	H2afz	4	1	3	0.111111	0.272727	1	0	0	0	0	0	0	0	1	0	0	1	1	0	0	0	0	0	0	0	0
51886	Fubp1	4	1	3	0.111111	0.272727	1	0	0	0	0	0	0	0	1	0	0	1	1	0	0	0	0	0	0	0	0
52874	D19Bwg1357e	4	2	2	0.222222	0.181818	1	0	0	1	0	1	0	0	0	0	0	0	1	0	0	0	0	0	0	0	0
53319	Nxf1	4	1	3	0.111111	0.272727	1	0	0	0	0	1	0	0	1	0	0	0	1	0	0	0	0	0	0	0	0
53356	Eif3g	4	1	3	0.111111	0.272727	1	0	0	0	0	0	0	0	1	0	0	1	1	0	0	0	0	0	0	0	0
53357	Pla2g6	4	2	2	0.222222	0.181818	1	0	0	1	0	1	0	0	0	0	0	1	0	0	0	0	0	0	0	0	0
53600	Timm23	4	2	2	0.222222	0.181818	1	0	0	1	0	0	0	0	0	0	0	1	1	0	0	0	0	0	0	0	0
53610	Nono	4	2	2	0.222222	0.181818	1	0	0	1	0	0	0	0	0	0	0	1	1	0	0	0	0	0	0	0	0
53890	Sart3	4	1	3	0.111111	0.272727	1	0	0	0	1	1	0	0	0	0	0	0	1	0	0	0	0	0	0	0	0
53893	Nudt5	4	2	2	0.222222	0.181818	1	0	0	1	0	0	0	0	0	0	0	1	1	0	0	0	0	0	0	0	0
54132	Pdlim1	4	2	2	0.222222	0.181818	1	0	0	1	0	0	0	0	0	0	0	1	1	0	0	0	0	0	0	0	0
54138	Atxn10	4	2	2	0.222222	0.181818	1	0	0	1	0	0	1	0	0	0	0	1	0	0	0	0	0	0	0	0	0
54219	Cd320	4	1	3	0.111111	0.272727	1	0	0	0	0	1	1	0	0	0	0	0	1	0	0	0	0	0	0	0	0
54324	Arhgef5	4	1	2	0.111111	0.181818	1	0	0	0	0	1	0	0	0	0	0	0	0	1	1	0	0	0	0	0	0
54364	Rpp30	4	2	2	0.222222	0.181818	1	0	0	1	0	0	0	0	1	0	0	1	0	0	0	0	0	0	0	0	0
56088	Psmg1	4	2	2	0.222222	0.181818	1	0	0	1	0	0	0	0	0	0	0	1	1	0	0	0	0	0	0	0	0
56196	Tdp2	4	2	2	0.222222	0.181818	1	0	0	1	0	0	0	0	0	0	0	1	1	0	0	0	0	0	0	0	0
56200	Ddx21	4	2	2	0.222222	0.181818	1	0	0	1	0	0	0	0	0	0	0	1	1	0	0	0	0	0	0	0	0
56207	Uchl5	4	2	2	0.222222	0.181818	1	0	0	1	0	0	0	0	0	0	0	1	1	0	0	0	0	0	0	0	0
56215	Acin1	4	1	3	0.111111	0.272727	1	0	0	0	0	0	0	0	1	0	0	1	1	0	0	0	0	0	0	0	0
56275	Rbm14	4	1	3	0.111111	0.272727	1	0	0	0	0	0	0	0	1	0	0	1	1	0	0	0	0	0	0	0	0
56292	Naa10	4	1	3	0.111111	0.272727	1	0	0	0	0	1	0	0	1	0	0	0	1	0	0	0	0	0	0	0	0
56351	Ptges3	4	2	2	0.222222	0.181818	1	0	0	1	0	0	0	0	0	0	0	1	1	0	0	0	0	0	0	0	0
56420	Ppp4c	4	2	2	0.222222	0.181818	1	0	0	0	0	0	0	0	0	0	0	1	1	0	0	0	1	0	0	0	0
56459	Sae1	4	2	2	0.222222	0.181818	1	0	0	1	0	0	0	0	0	0	0	1	1	0	0	0	0	0	0	0	0
56488	Nxt1	4	1	3	0.111111	0.272727	1	0	0	0	0	0	0	0	1	0	0	1	1	0	0	0	0	0	0	0	0
56495	Asna1	4	2	2	0.222222	0.181818	1	0	1	0	0	0	0	0	0	1	0	1	0	0	0	0	0	0	0	0	0
57441	Gmnn	4	1	3	0.111111	0.272727	1	0	0	0	0	0	0	0	1	0	0	1	1	0	0	0	0	0	0	0	0
57815	Spata5	4	2	2	0.222222	0.181818	1	0	0	1	0	0	0	0	0	0	0	1	1	0	0	0	0	0	0	0	0
60411	Cenpk	4	1	3	0.111111	0.272727	1	0	0	0	0	0	0	0	1	0	0	1	1	0	0	0	0	0	0	0	0
60595	Actn4	4	2	2	0.222222	0.181818	1	0	0	1	0	0	0	0	0	0	0	1	1	0	0	0	0	0	0	0	0
64058	Perp	4	3	1	0.333333	0.0909091	1	0	1	1	0	1	0	0	0	0	0	0	0	0	0	0	0	0	0	0	0
64113	Moap1	4	2	2	0.222222	0.181818	1	0	0	1	0	0	0	0	0	0	0	1	1	0	0	0	0	0	0	0	0
65020	Zfp110	4	1	3	0.111111	0.272727	1	0	0	0	0	1	0	0	1	0	0	1	0	0	0	0	0	0	0	0	0
65246	Xpo7	4	3	1	0.333333	0.0909091	1	0	0	1	0	0	0	0	0	0	0	1	0	0	0	0	1	0	0	0	0
66118	Sarnp	4	2	2	0.222222	0.181818	1	0	0	1	0	0	0	0	0	0	0	1	1	0	0	0	0	0	0	0	0
66164	Nip7	4	2	2	0.222222	0.181818	1	0	0	1	0	0	0	0	0	0	0	1	1	0	0	0	0	0	0	0	0
66181	Nop10	4	1	3	0.111111	0.272727	1	0	0	0	0	1	0	0	1	0	0	0	1	0	0	0	0	0	0	0	0
66223	Mrpl35	4	2	2	0.222222	0.181818	1	0	0	1	0	0	0	0	0	0	0	1	1	0	0	0	0	0	0	0	0
66230	Mrps28	4	1	3	0.111111	0.272727	1	0	0	0	0	0	0	0	1	0	0	1	1	0	0	0	0	0	0	0	0
66310	Dpy30	4	2	2	0.222222	0.181818	1	0	0	1	0	0	0	0	0	0	0	1	1	0	0	0	0	0	0	0	0
66356	Knop1	4	2	2	0.222222	0.181818	1	0	0	1	0	0	0	0	0	0	0	1	1	0	0	0	0	0	0	0	0
66413	Psmd6	4	2	2	0.222222	0.181818	1	0	0	1	0	0	0	0	0	0	0	1	1	0	0	0	0	0	0	0	0
66493	Mrpl51	4	2	2	0.222222	0.181818	1	0	0	1	0	0	0	0	0	0	0	1	1	0	0	0	0	0	0	0	0
66656	Eef1d	4	1	3	0.111111	0.272727	1	0	0	0	0	0	0	0	0	0	1	1	1	0	0	0	0	0	0	0	0
66679	Rae1	4	2	2	0.222222	0.181818	1	0	1	0	0	0	0	0	1	1	0	0	0	0	0	0	0	0	0	0	0
66840	Wdr45b	4	2	2	0.222222	0.181818	1	0	0	1	0	1	0	0	0	0	0	0	1	0	0	0	0	0	0	0	0
66877	Crnkl1	4	2	2	0.222222	0.181818	1	0	0	1	0	0	0	0	0	0	0	1	1	0	0	0	0	0	0	0	0
66929	Asf1b	4	2	2	0.222222	0.181818	1	0	1	0	0	0	0	0	0	0	0	1	1	0	0	0	0	0	0	0	0
66953	Cdca7	4	1	3	0.111111	0.272727	1	0	0	0	0	0	1	0	1	0	0	0	1	0	0	0	0	0	0	0	0
66988	Lap3	4	2	2	0.222222	0.181818	1	0	0	1	0	0	0	0	0	0	0	1	1	0	0	0	0	0	0	0	0
67059	Ola1	4	3	1	0.333333	0.0909091	1	0	1	1	0	0	0	0	0	0	0	1	0	0	0	0	0	0	0	0	0
67116	Cuedc2	4	1	3	0.111111	0.272727	1	0	0	0	0	0	0	0	1	1	0	0	1	0	0	0	0	0	0	0	0
67211	Armc10	4	2	2	0.222222	0.181818	1	0	0	1	0	0	0	0	1	0	0	0	1	0	0	0	0	0	0	0	0
67439	Xab2	4	2	2	0.222222	0.181818	1	0	1	0	0	1	0	0	0	0	0	0	1	0	0	0	0	0	0	0	0
67681	Mrpl18	4	2	2	0.222222	0.181818	1	0	0	1	0	0	0	0	0	0	0	1	1	0	0	0	0	0	0	0	0
67956	Setd8	4	1	3	0.111111	0.272727	1	0	0	0	0	0	0	0	1	0	0	1	1	0	0	0	0	0	0	0	0
68080	Gpn3	4	2	2	0.222222	0.181818	1	0	0	1	0	0	0	0	0	0	0	1	1	0	0	0	0	0	0	0	0
68083	Pak1ip1	4	2	2	0.222222	0.181818	1	0	0	1	0	0	0	0	0	0	0	1	1	0	0	0	0	0	0	0	0
68133	Gcsh	4	2	2	0.222222	0.181818	1	0	0	1	0	1	0	0	0	0	0	1	0	0	0	0	0	0	0	0	0
68153	Gtf2e2	4	2	2	0.222222	0.181818	1	0	0	1	0	0	0	0	0	0	0	1	1	0	0	0	0	0	0	0	0
68479	Phf5a	4	2	2	0.222222	0.181818	1	0	0	1	0	0	0	0	0	0	0	1	1	0	0	0	0	0	0	0	0
68730	Dus1l	4	2	2	0.222222	0.181818	1	0	0	1	0	0	0	0	0	0	0	1	1	0	0	0	0	0	0	0	0
70247	Psmd1	4	2	2	0.222222	0.181818	1	0	0	1	0	0	0	0	0	0	0	1	1	0	0	0	0	0	0	0	0
70449	2610209C05Rik	4	2	2	0.222222	0.181818	1	0	0	1	0	0	0	0	1	0	0	1	0	0	0	0	0	0	0	0	0
70465	Wdr77	4	2	2	0.222222	0.181818	1	0	0	1	0	0	0	0	0	0	0	1	1	0	0	0	0	0	0	0	0
70572	Ipo5	4	2	2	0.222222	0.181818	1	0	0	1	0	0	0	0	0	0	0	1	1	0	0	0	0	0	0	0	0
70686	Dusp16	4	2	2	0.222222	0.181818	1	0	0	1	0	0	0	0	1	0	0	1	0	0	0	0	0	0	0	0	0
71805	Nup93	4	2	2	0.222222	0.181818	1	0	0	1	0	0	0	0	0	0	0	1	1	0	0	0	0	0	0	0	0
71807	Tars2	4	2	2	0.222222	0.181818	1	0	0	1	0	1	0	0	0	0	0	1	0	0	0	0	0	0	0	0	0
71819	Kif23	4	1	3	0.111111	0.272727	1	0	0	0	0	0	0	0	1	0	0	1	1	0	0	0	0	0	0	0	0
71989	Rpusd4	4	2	2	0.222222	0.181818	1	0	0	1	0	1	0	0	0	0	0	1	0	0	0	0	0	0	0	0	0
72075	Ogfr	4	1	3	0.111111	0.272727	1	0	0	0	0	0	0	0	1	0	0	1	1	0	0	0	0	0	0	0	0
72416	Lrpprc	4	2	2	0.222222	0.181818	1	0	0	1	0	0	0	0	0	0	0	1	1	0	0	0	0	0	0	0	0
72572	Spats2	4	2	2	0.222222	0.181818	1	0	0	1	0	0	0	0	0	0	0	1	1	0	0	0	0	0	0	0	0
73158	Larp1	4	2	2	0.222222	0.181818	1	0	0	1	0	0	0	0	1	0	0	1	0	0	0	0	0	0	0	0	0
73693	Dppa4	4	4	0	0.444444	0	1	0	1	1	0	0	0	0	0	0	0	0	0	0	0	0	0	0	0	0	1
73703	Dppa2	4	4	0	0.444444	0	1	1	1	1	0	0	0	0	0	0	0	0	0	0	0	0	0	0	0	0	0
73830	Eif3k	4	1	3	0.111111	0.272727	1	0	0	0	0	1	0	0	0	0	1	0	1	0	0	0	0	0	0	0	0
74105	Gga2	4	3	1	0.333333	0.0909091	1	0	1	1	0	0	0	0	0	0	0	0	1	0	0	0	0	0	0	0	0
74198	Dtx2	4	1	3	0.111111	0.272727	1	0	0	0	0	1	0	0	1	0	0	0	1	0	0	0	0	0	0	0	0
74204	Xpo6	4	1	3	0.111111	0.272727	1	0	0	0	0	1	0	0	1	0	0	0	1	0	0	0	0	0	0	0	0
74211	1700017B05Rik	4	1	3	0.111111	0.272727	1	0	0	0	0	1	0	0	1	0	0	0	1	0	0	0	0	0	0	0	0
74255	Smu1	4	2	2	0.222222	0.181818	1	0	0	1	0	0	0	0	0	0	0	1	1	0	0	0	0	0	0	0	0
76130	Las1l	4	2	2	0.222222	0.181818	1	0	0	1	0	1	0	0	0	0	0	1	0	0	0	0	0	0	0	0	0
76366	Mtif3	4	2	2	0.222222	0.181818	1	0	0	1	0	0	0	0	1	0	0	0	1	0	0	0	0	0	0	0	0
76531	2600001M11Rik	4	2	2	0.222222	0.181818	1	0	0	1	0	0	0	0	0	0	0	1	1	0	0	0	0	0	0	0	0
76784	Mtif2	4	2	2	0.222222	0.181818	1	0	0	1	0	0	0	0	0	0	0	1	1	0	0	0	0	0	0	0	0
77634	Snapc3	4	2	2	0.222222	0.181818	1	0	0	1	0	0	0	0	0	0	0	1	1	0	0	0	0	0	0	0	0
80744	Cwc22	4	2	2	0.222222	0.181818	1	0	0	1	0	1	0	0	0	0	0	1	0	0	0	0	0	0	0	0	0
27267	Cars	4	2	2	0.222222	0.181818	0	1	0	1	0	1	0	0	1	0	0	0	0	0	0	0	0	0	0	0	0
20719	Serpinb6a	4	3	1	0.333333	0.0909091	0	1	1	1	0	1	0	0	0	0	0	0	0	0	0	0	0	0	0	0	0
20404	Sh3gl2	4	2	2	0.222222	0.181818	0	1	1	0	1	0	0	0	0	1	0	0	0	0	0	0	0	0	0	0	0
16598	Klf2	4	3	1	0.333333	0.0909091	0	1	0	0	0	0	0	0	0	0	0	0	0	1	0	0	0	0	1	0	1
80890	Trim2	4	2	2	0.222222	0.181818	0	1	1	0	0	0	0	0	0	1	1	0	0	0	0	0	0	0	0	0	0
67374	Jam2	4	2	2	0.222222	0.181818	0	1	1	0	1	0	0	0	0	1	0	0	0	0	0	0	0	0	0	0	0
26554	Cul3	4	3	1	0.333333	0.0909091	0	0	1	1	0	0	0	0	0	0	0	1	0	0	0	0	1	0	0	0	0
14049	Eya2	4	1	3	0.111111	0.272727	0	0	0	0	0	1	0	0	0	0	0	0	1	1	0	0	1	0	0	0	0
26374	Rfwd2	4	2	2	0.222222	0.181818	0	0	0	1	0	0	0	0	0	0	0	1	1	0	0	0	1	0	0	0	0
110695	Aldh7a1	4	1	3	0.111111	0.272727	0	0	1	0	1	0	1	0	0	1	0	0	0	0	0	0	0	0	0	0	0
28080	Atp5o	4	2	2	0.222222	0.181818	0	0	1	1	0	0	0	0	0	1	0	1	0	0	0	0	0	0	0	0	0
12064	Bdnf	4	2	2	0.222222	0.181818	0	0	1	1	0	0	0	0	0	1	0	0	0	1	0	0	0	0	0	0	0
12389	Cav1	4	2	2	0.222222	0.181818	0	0	1	1	0	0	0	0	0	1	0	0	0	1	0	0	0	0	0	0	0
12445	Ccnd3	4	1	3	0.111111	0.272727	0	0	1	0	1	0	0	0	0	0	0	1	1	0	0	0	0	0	0	0	0
12520	Cd81	4	1	3	0.111111	0.272727	0	0	1	0	0	1	0	0	0	1	1	0	0	0	0	0	0	0	0	0	0
12709	Ckb	4	2	2	0.222222	0.181818	0	0	1	0	0	0	0	0	1	1	0	0	0	0	0	0	0	1	0	0	0
12841	Col9a3	4	1	3	0.111111	0.272727	0	0	1	0	0	0	0	0	1	1	0	0	0	1	0	0	0	0	0	0	0
13039	Ctsl	4	2	2	0.222222	0.181818	0	0	1	1	1	0	0	0	0	1	0	0	0	0	0	0	0	0	0	0	0
69635	Dapk1	4	2	2	0.222222	0.181818	0	0	1	0	1	0	0	0	0	1	0	0	0	0	0	0	0	1	0	0	0
13436	Dnmt3b	4	2	2	0.222222	0.181818	0	0	1	0	1	0	0	0	0	0	0	0	0	1	0	0	0	0	0	0	1
13799	En2	4	2	2	0.222222	0.181818	0	0	1	1	1	0	0	0	0	1	0	0	0	0	0	0	0	0	0	0	0
14148	Fdx1	4	2	2	0.222222	0.181818	0	0	1	1	1	1	0	0	0	0	0	0	0	0	0	0	0	0	0	0	0
14735	Gpc4	4	2	2	0.222222	0.181818	0	0	1	1	0	0	0	0	1	0	0	0	1	0	0	0	0	0	0	0	0
14194	Fh1	4	2	2	0.222222	0.181818	0	0	1	1	0	0	0	0	0	0	0	1	1	0	0	0	0	0	0	0	0
30795	Fkbp3	4	1	3	0.111111	0.272727	0	0	1	0	1	1	0	0	0	1	0	0	0	0	0	0	0	0	0	0	0
286940	Flnb	4	1	3	0.111111	0.272727	0	0	1	0	1	0	0	0	0	1	0	0	0	1	0	0	0	0	0	0	0
14390	Gabpa	4	3	1	0.333333	0.0909091	0	0	1	1	1	0	0	0	0	0	0	0	0	0	0	0	0	0	1	0	0
232906	Arhgap35	4	1	3	0.111111	0.272727	0	0	1	0	1	0	0	0	0	1	0	0	0	1	0	0	0	0	0	0	0
14884	Gtf2h1	4	2	2	0.222222	0.181818	0	0	1	1	0	0	0	0	0	1	0	1	0	0	0	0	0	0	0	0	0
16646	Kpna1	4	2	2	0.222222	0.181818	0	0	1	1	0	0	0	0	0	0	0	1	1	0	0	0	0	0	0	0	0
16648	Kpna3	4	2	2	0.222222	0.181818	0	0	1	1	0	0	0	0	0	0	0	1	1	0	0	0	0	0	0	0	0
17436	Me1	4	2	2	0.222222	0.181818	0	0	1	1	0	0	0	0	0	1	0	1	0	0	0	0	0	0	0	0	0
26425	Nubp1	4	1	3	0.111111	0.272727	0	0	1	0	0	0	0	0	0	1	0	1	1	0	0	0	0	0	0	0	0
27354	Nbn	4	2	2	0.222222	0.181818	0	0	1	1	0	0	0	0	0	0	0	1	1	0	0	0	0	0	0	0	0
68349	Ndufs3	4	1	3	0.111111	0.272727	0	0	1	0	0	0	0	0	0	1	0	1	1	0	0	0	0	0	0	0	0
18972	Pold2	4	1	3	0.111111	0.272727	0	0	1	0	0	0	0	0	1	1	0	0	1	0	0	0	0	0	0	0	0
19089	Prkcsh	4	1	3	0.111111	0.272727	0	0	1	0	0	0	0	0	1	1	0	0	1	0	0	0	0	0	0	0	0
67089	Psmc6	4	2	2	0.222222	0.181818	0	0	1	1	0	0	0	0	0	0	0	1	1	0	0	0	0	0	0	0	0
22123	Psmd3	4	2	2	0.222222	0.181818	0	0	1	1	0	0	0	0	0	1	0	1	0	0	0	0	0	0	0	0	0
20393	Sgk1	4	3	1	0.333333	0.0909091	0	0	1	1	0	0	1	0	0	0	0	0	0	0	0	0	0	0	0	0	1
21750	Terf2	4	2	2	0.222222	0.181818	0	0	1	0	1	0	0	0	1	0	0	0	0	0	0	0	0	0	0	0	1
22003	Tpm1	4	2	2	0.222222	0.181818	0	0	1	1	0	1	0	0	0	0	0	0	0	1	0	0	0	0	0	0	0
22174	Tyro3	4	2	2	0.222222	0.181818	0	0	1	0	0	0	0	0	0	1	0	0	1	0	0	0	0	1	0	0	0
66352	Blzf1	4	2	2	0.222222	0.181818	0	0	1	1	0	1	0	0	0	0	0	1	0	0	0	0	0	0	0	0	0
56464	Ctsf	4	1	3	0.111111	0.272727	0	0	1	0	0	1	0	0	0	1	0	0	0	1	0	0	0	0	0	0	0
76238	Grhpr	4	1	3	0.111111	0.272727	0	0	1	0	1	1	0	0	0	1	0	0	0	0	0	0	0	0	0	0	0
56473	Fads2	4	1	3	0.111111	0.272727	0	0	1	0	1	0	0	0	0	1	1	0	0	0	0	0	0	0	0	0	0
56397	Morf4l2	4	2	2	0.222222	0.181818	0	0	1	1	0	0	0	0	0	0	0	1	1	0	0	0	0	0	0	0	0
17775	Laptm4a	4	2	2	0.222222	0.181818	0	0	1	1	0	1	0	0	0	0	0	1	0	0	0	0	0	0	0	0	0
12355	Nr1i3	4	1	3	0.111111	0.272727	0	0	1	0	1	0	0	0	0	1	0	1	0	0	0	0	0	0	0	0	0
24064	Spry2	4	1	3	0.111111	0.272727	0	0	1	0	1	0	0	0	0	1	1	0	0	0	0	0	0	0	0	0	0
56089	Ramp3	4	1	3	0.111111	0.272727	0	0	1	0	1	1	0	0	0	0	0	0	0	1	0	0	0	0	0	0	0
19124	Procr	4	1	3	0.111111	0.272727	0	0	1	0	1	1	0	0	0	0	0	0	0	1	0	0	0	0	0	0	0
13992	Khdrbs3	4	1	3	0.111111	0.272727	0	0	1	0	1	0	0	0	0	1	0	0	0	1	0	0	0	0	0	0	0
20620	Plk2	4	1	3	0.111111	0.272727	0	0	1	0	0	1	0	0	0	1	0	0	0	1	0	0	0	0	0	0	0
50884	Nckap1	4	1	3	0.111111	0.272727	0	0	1	0	0	1	0	0	0	1	0	0	0	1	0	0	0	0	0	0	0
53328	Pgrmc1	4	1	3	0.111111	0.272727	0	0	1	0	1	1	0	0	0	1	0	0	0	0	0	0	0	0	0	0	0
26893	Cops6	4	1	3	0.111111	0.272727	0	0	1	0	0	0	0	0	0	1	0	1	1	0	0	0	0	0	0	0	0
80915	Dusp12	4	2	2	0.222222	0.181818	0	0	1	1	1	1	0	0	0	0	0	0	0	0	0	0	0	0	0	0	0
56447	Copz1	4	2	2	0.222222	0.181818	0	0	1	1	0	0	0	0	1	0	0	1	0	0	0	0	0	0	0	0	0
69162	Sec31a	4	2	2	0.222222	0.181818	0	0	1	1	0	0	0	0	0	1	0	1	0	0	0	0	0	0	0	0	0
231670	Fbxo21	4	1	3	0.111111	0.272727	0	0	1	0	1	0	1	0	0	1	0	0	0	0	0	0	0	0	0	0	0
14376	Ganab	4	1	3	0.111111	0.272727	0	0	1	0	0	0	0	0	0	1	0	1	1	0	0	0	0	0	0	0	0
66248	Alg5	4	2	2	0.222222	0.181818	0	0	1	1	0	0	0	0	0	1	0	1	0	0	0	0	0	0	0	0	0
56348	Hsd17b12	4	1	3	0.111111	0.272727	0	0	1	0	0	0	0	0	1	1	0	1	0	0	0	0	0	0	0	0	0
66366	Ergic3	4	1	3	0.111111	0.272727	0	0	1	0	0	0	0	0	0	1	1	0	1	0	0	0	0	0	0	0	0
68523	Fam96b	4	1	3	0.111111	0.272727	0	0	1	0	0	1	0	0	0	1	0	0	1	0	0	0	0	0	0	0	0
56524	Mpp6	4	2	2	0.222222	0.181818	0	0	1	1	1	0	0	0	0	0	0	1	0	0	0	0	0	0	0	0	0
84113	Ptov1	4	1	3	0.111111	0.272727	0	0	1	0	1	0	0	0	0	1	0	0	0	1	0	0	0	0	0	0	0
74195	Elp3	4	2	2	0.222222	0.181818	0	0	1	1	1	0	0	0	0	0	0	1	0	0	0	0	0	0	0	0	0
57743	Sec61a2	4	2	2	0.222222	0.181818	0	0	1	1	0	0	0	0	0	1	0	1	0	0	0	0	0	0	0	0	0
52123	Agpat5	4	1	3	0.111111	0.272727	0	0	1	0	0	0	0	0	0	1	0	1	1	0	0	0	0	0	0	0	0
16210	Impact	4	1	3	0.111111	0.272727	0	0	1	0	0	1	0	0	0	1	0	0	0	1	0	0	0	0	0	0	0
13800	Enah	4	1	3	0.111111	0.272727	0	0	1	0	1	0	0	0	0	1	0	0	0	1	0	0	0	0	0	0	0
66233	Dmap1	4	1	3	0.111111	0.272727	0	0	1	0	0	1	0	0	1	1	0	0	0	0	0	0	0	0	0	0	0
14187	Akr1b8	4	2	2	0.222222	0.181818	0	0	1	1	1	0	0	0	0	1	0	0	0	0	0	0	0	0	0	0	0
22688	Zfp26	4	2	2	0.222222	0.181818	0	0	1	1	0	0	0	0	0	0	0	1	1	0	0	0	0	0	0	0	0
68626	Elac2	4	2	2	0.222222	0.181818	0	0	1	1	0	0	0	0	0	1	0	1	0	0	0	0	0	0	0	0	0
66419	Mrpl11	4	2	2	0.222222	0.181818	0	0	1	1	0	0	0	0	0	1	0	0	1	0	0	0	0	0	0	0	0
114606	Tle6	4	1	3	0.111111	0.272727	0	0	1	0	1	0	0	0	0	1	1	0	0	0	0	0	0	0	0	0	0
66427	Cyb5b	4	1	3	0.111111	0.272727	0	0	1	0	1	0	0	0	0	0	0	1	1	0	0	0	0	0	0	0	0
19707	Reps1	4	1	3	0.111111	0.272727	0	0	1	0	0	1	0	0	1	1	0	0	0	0	0	0	0	0	0	0	0
69524	Esam	4	1	3	0.111111	0.272727	0	0	1	0	1	0	1	0	0	0	0	0	0	1	0	0	0	0	0	0	0
75695	Rilpl1	4	1	3	0.111111	0.272727	0	0	1	0	1	0	0	0	0	1	0	0	0	1	0	0	0	0	0	0	0
11492	Adam19	4	1	3	0.111111	0.272727	0	0	0	1	0	0	0	0	1	0	0	1	1	0	0	0	0	0	0	0	0
11740	Slc25a5	4	2	2	0.222222	0.181818	0	0	0	1	0	0	0	0	1	0	0	1	0	0	0	0	0	0	1	0	0
11778	Ap3s2	4	1	2	0.111111	0.181818	0	0	0	1	0	0	0	0	0	0	0	1	1	0	1	0	0	0	0	0	0
11909	Atf2	4	2	2	0.222222	0.181818	0	0	0	1	0	0	0	0	0	0	0	1	1	0	0	0	0	0	0	0	1
12361	Cask	4	1	3	0.111111	0.272727	0	0	0	1	0	0	0	0	1	0	1	1	0	0	0	0	0	0	0	0	0
12417	Cbx3	4	1	3	0.111111	0.272727	0	0	0	1	0	0	0	0	1	0	0	1	1	0	0	0	0	0	0	0	0
12460	Ccs	4	1	3	0.111111	0.272727	0	0	0	1	0	1	0	0	0	0	1	1	0	0	0	0	0	0	0	0	0
12617	Cenpc1	4	1	3	0.111111	0.272727	0	0	0	1	0	1	0	0	1	0	0	1	0	0	0	0	0	0	0	0	0
13405	Dmd	4	1	3	0.111111	0.272727	0	0	0	1	0	0	0	0	0	0	1	1	0	1	0	0	0	0	0	0	0
14020	Evi5	4	1	3	0.111111	0.272727	0	0	0	1	0	0	0	0	0	1	1	1	0	0	0	0	0	0	0	0	0
14115	Fbln2	4	1	3	0.111111	0.272727	0	0	0	1	0	0	0	0	1	0	0	1	0	1	0	0	0	0	0	0	0
14453	Gas2	4	1	3	0.111111	0.272727	0	0	0	1	0	1	0	0	1	0	0	1	0	0	0	0	0	0	0	0	0
14635	Galk1	4	1	3	0.111111	0.272727	0	0	0	1	0	1	0	0	0	1	0	0	1	0	0	0	0	0	0	0	0
14688	Gnb1	4	1	3	0.111111	0.272727	0	0	0	1	0	1	0	0	0	1	0	1	0	0	0	0	0	0	0	0	0
14955	H19	4	1	3	0.111111	0.272727	0	0	0	1	0	0	0	0	1	0	0	1	1	0	0	0	0	0	0	0	0
14969	H2-Eb1	4	1	3	0.111111	0.272727	0	0	0	1	0	1	1	0	1	0	0	0	0	0	0	0	0	0	0	0	0
15357	Hmgcr	4	1	3	0.111111	0.272727	0	0	0	1	0	0	0	0	1	0	0	1	1	0	0	0	0	0	0	0	0
15364	Hmga2	4	1	3	0.111111	0.272727	0	0	0	1	0	0	1	0	1	0	0	0	1	0	0	0	0	0	0	0	0
16419	Itgb5	4	1	3	0.111111	0.272727	0	0	0	1	0	0	0	0	0	1	0	1	0	1	0	0	0	0	0	0	0
16563	Kif2a	4	1	3	0.111111	0.272727	0	0	0	1	0	1	0	0	0	0	0	1	1	0	0	0	0	0	0	0	0
16653	Kras	4	1	3	0.111111	0.272727	0	0	0	1	0	1	0	0	0	0	0	1	1	0	0	0	0	0	0	0	0
16828	Ldha	4	1	3	0.111111	0.272727	0	0	0	1	0	0	0	0	1	0	0	1	1	0	0	0	0	0	0	0	0
16835	Ldlr	4	1	3	0.111111	0.272727	0	0	0	1	0	0	0	0	1	0	0	1	1	0	0	0	0	0	0	0	0
17184	Matr3	4	1	3	0.111111	0.272727	0	0	0	1	0	0	0	0	0	0	1	1	1	0	0	0	0	0	0	0	0
17749	Polr2k	4	1	3	0.111111	0.272727	0	0	0	1	0	0	0	0	1	1	0	0	1	0	0	0	0	0	0	0	0
18000	37500	4	1	3	0.111111	0.272727	0	0	0	1	0	0	0	0	1	0	0	1	1	0	0	0	0	0	0	0	0
18102	Nme1	4	2	2	0.222222	0.181818	0	0	0	1	0	1	0	0	0	0	0	1	0	0	0	0	0	1	0	0	0
18567	Pdcd2	4	1	3	0.111111	0.272727	0	0	0	1	0	1	0	0	1	0	0	1	0	0	0	0	0	0	0	0	0
18983	Cnot7	4	1	3	0.111111	0.272727	0	0	0	1	0	1	0	0	1	0	0	1	0	0	0	0	0	0	0	0	0
19012	Ppap2a	4	1	3	0.111111	0.272727	0	0	0	1	0	1	0	0	0	0	1	0	0	1	0	0	0	0	0	0	0
19134	Prpf4b	4	2	2	0.222222	0.181818	0	0	0	1	0	0	0	0	1	0	0	1	0	0	0	0	0	1	0	0	0
19167	Psma3	4	1	3	0.111111	0.272727	0	0	0	1	0	0	0	0	1	0	0	1	1	0	0	0	0	0	0	0	0
19243	Ptp4a1	4	1	3	0.111111	0.272727	0	0	0	1	0	0	0	0	1	0	0	1	1	0	0	0	0	0	0	0	0
19248	Ptpn12	4	2	2	0.222222	0.181818	0	0	0	1	0	1	0	0	0	0	0	0	0	1	0	0	0	0	1	0	0
19876	Robo1	4	1	3	0.111111	0.272727	0	0	0	1	0	0	0	0	1	0	0	1	0	1	0	0	0	0	0	0	0
20187	Ryk	4	2	2	0.222222	0.181818	0	0	0	1	0	1	0	0	0	0	0	1	0	0	0	0	0	1	0	0	0
20334	Sec23a	4	1	3	0.111111	0.272727	0	0	0	1	0	1	0	0	0	0	1	1	0	0	0	0	0	0	0	0	0
20482	Skil	4	1	3	0.111111	0.272727	0	0	0	1	1	1	0	0	0	0	0	0	1	0	0	0	0	0	0	0	0
20496	Slc12a2	4	1	3	0.111111	0.272727	0	0	0	1	0	1	1	0	0	0	0	0	0	1	0	0	0	0	0	0	0
20775	Sqle	4	1	3	0.111111	0.272727	0	0	0	1	0	0	0	0	1	0	0	1	1	0	0	0	0	0	0	0	0
20823	Ssb	4	2	2	0.222222	0.181818	0	0	0	1	0	0	0	0	0	0	0	1	1	0	0	0	0	0	1	0	0
22289	Kdm6a	4	2	2	0.222222	0.181818	0	0	0	1	0	0	0	0	1	0	1	0	0	0	0	0	0	0	0	0	1
23806	Arih1	4	1	3	0.111111	0.272727	0	0	0	1	0	1	0	0	0	0	0	1	1	0	0	0	0	0	0	0	0
24060	Slc35a1	4	1	3	0.111111	0.272727	0	0	0	1	0	0	0	0	1	0	0	1	1	0	0	0	0	0	0	0	0
27280	Phlda3	4	1	3	0.111111	0.272727	0	0	0	1	0	0	0	0	1	1	0	1	0	0	0	0	0	0	0	0	0
27999	Fam3c	4	1	3	0.111111	0.272727	0	0	0	1	0	1	0	0	0	0	1	1	0	0	0	0	0	0	0	0	0
50797	Copb2	4	1	3	0.111111	0.272727	0	0	0	1	0	0	0	0	1	0	0	1	1	0	0	0	0	0	0	0	0
53312	Nub1	4	1	3	0.111111	0.272727	0	0	0	1	1	1	0	0	0	0	0	1	0	0	0	0	0	0	0	0	0
54401	Ywhab	4	1	3	0.111111	0.272727	0	0	0	1	0	1	0	0	0	0	1	1	0	0	0	0	0	0	0	0	0
56195	Ptbp2	4	1	3	0.111111	0.272727	0	0	0	1	0	0	0	0	1	0	0	1	1	0	0	0	0	0	0	0	0
56264	Cpxm1	4	1	3	0.111111	0.272727	0	0	0	1	0	1	0	0	1	0	0	1	0	0	0	0	0	0	0	0	0
56312	Nupr1	4	1	3	0.111111	0.272727	0	0	0	1	0	1	0	0	0	1	0	0	0	1	0	0	0	0	0	0	0
56332	Amotl2	4	1	3	0.111111	0.272727	0	0	0	1	0	0	0	0	1	1	0	0	1	0	0	0	0	0	0	0	0
56372	1110004F10Rik	4	1	3	0.111111	0.272727	0	0	0	1	0	0	0	0	1	0	0	1	1	0	0	0	0	0	0	0	0
56449	Ybx3	4	1	3	0.111111	0.272727	0	0	0	1	0	0	0	0	1	0	0	1	1	0	0	0	0	0	0	0	0
56503	Ankrd49	4	1	3	0.111111	0.272727	0	0	0	1	0	0	0	0	1	0	0	1	1	0	0	0	0	0	0	0	0
65970	Lima1	4	1	3	0.111111	0.272727	0	0	0	1	0	1	0	0	1	0	0	1	0	0	0	0	0	0	0	0	0
66044	Dtd1	4	1	3	0.111111	0.272727	0	0	0	1	0	1	1	0	0	0	0	0	0	1	0	0	0	0	0	0	0
66074	Tmem167	4	1	3	0.111111	0.272727	0	0	0	1	0	0	0	0	0	0	1	1	1	0	0	0	0	0	0	0	0
66235	Eif1ax	4	1	3	0.111111	0.272727	0	0	0	1	0	0	0	0	1	0	0	1	1	0	0	0	0	0	0	0	0
66597	Trim13	4	1	3	0.111111	0.272727	0	0	0	1	1	1	0	0	0	0	0	0	1	0	0	0	0	0	0	0	0
66868	Mfsd1	4	1	3	0.111111	0.272727	0	0	0	1	0	0	0	0	1	0	0	1	1	0	0	0	0	0	0	0	0
67005	Polr3k	4	1	3	0.111111	0.272727	0	0	0	1	0	0	0	0	1	0	0	1	1	0	0	0	0	0	0	0	0
67128	Ube2g1	4	1	3	0.111111	0.272727	0	0	0	1	0	0	0	0	0	0	1	1	1	0	0	0	0	0	0	0	0
67890	Ufm1	4	1	3	0.111111	0.272727	0	0	0	1	0	0	0	0	1	0	0	1	1	0	0	0	0	0	0	0	0
67973	Mphosph10	4	1	3	0.111111	0.272727	0	0	0	1	0	1	0	0	0	0	0	1	1	0	0	0	0	0	0	0	0
68066	Slc25a39	4	1	3	0.111111	0.272727	0	0	0	1	0	0	0	0	1	0	0	1	1	0	0	0	0	0	0	0	0
69082	Zc3h15	4	1	3	0.111111	0.272727	0	0	0	1	1	0	0	0	0	0	0	1	1	0	0	0	0	0	0	0	0
69702	Ndufaf1	4	1	3	0.111111	0.272727	0	0	0	1	0	1	0	0	0	1	0	1	0	0	0	0	0	0	0	0	0
70208	Med23	4	1	3	0.111111	0.272727	0	0	0	1	0	1	0	0	1	0	0	1	0	0	0	0	0	0	0	0	0
71982	Snx10	4	1	3	0.111111	0.272727	0	0	0	1	0	0	1	0	0	0	0	1	0	1	0	0	0	0	0	0	0
72692	Hnrnpll	4	1	3	0.111111	0.272727	0	0	0	1	0	0	0	0	1	0	0	1	1	0	0	0	0	0	0	0	0
74145	F13a1	4	1	3	0.111111	0.272727	0	0	0	1	0	1	0	0	0	0	0	1	1	0	0	0	0	0	0	0	0
80914	Uck2	4	1	3	0.111111	0.272727	0	0	0	1	0	1	0	0	1	0	0	0	1	0	0	0	0	0	0	0	0
83410	Cstf2t	4	1	3	0.111111	0.272727	0	0	0	1	0	0	0	0	1	0	0	1	1	0	0	0	0	0	0	0	0
21877	Tk1	4	1	3	0.111111	0.272727	0	0	0	0	0	0	0	0	1	0	0	1	1	0	0	0	0	1	0	0	0
56347	Eif3c	4	1	3	0.111111	0.272727	0	0	0	0	0	0	0	0	1	0	0	1	1	0	0	0	0	0	1	0	0
11837	Rplp0	4	1	3	0.111111	0.272727	0	0	0	0	1	0	0	0	1	0	0	0	1	0	0	0	0	0	1	0	0
69660	Tmbim1	4	1	3	0.111111	0.272727	0	0	0	0	0	1	0	0	0	0	1	0	0	1	0	0	0	0	1	0	0
14183	Fgfr2	4	1	3	0.111111	0.272727	0	0	0	0	0	1	0	1	0	1	0	0	0	0	0	0	0	0	1	0	0
19252	Dusp1	4	1	3	0.111111	0.272727	0	0	0	0	0	1	0	0	0	0	0	0	1	1	0	0	0	0	1	0	0
11363	Acadl	4	0	4	0	0.363636	0	0	0	0	1	1	0	0	0	1	0	1	0	0	0	0	0	0	0	0	0
56350	Arl3	4	0	4	0	0.363636	0	0	0	0	1	0	0	0	0	1	0	0	1	1	0	0	0	0	0	0	0
13007	Csrp1	4	0	3	0	0.272727	0	0	0	0	1	0	0	0	0	1	1	0	0	0	1	0	0	0	0	0	0
66596	Gtf3a	4	0	4	0	0.363636	0	0	0	0	1	0	0	0	1	0	0	1	1	0	0	0	0	0	0	0	0
16179	Irak1	4	0	4	0	0.363636	0	0	0	0	1	1	0	0	0	0	1	0	1	0	0	0	0	0	0	0	0
17000	Ltbr	4	0	4	0	0.363636	0	0	0	0	1	1	0	0	1	0	0	1	0	0	0	0	0	0	0	0	0
27362	Dnajb9	4	0	4	0	0.363636	0	0	0	0	1	0	0	0	0	1	1	0	0	1	0	0	0	0	0	0	0
26611	Rcn2	4	1	3	0.111111	0.272727	0	0	0	0	1	0	0	0	0	1	0	1	0	0	0	0	0	0	0	0	1
20193	S100a1	4	0	4	0	0.363636	0	0	0	0	1	1	0	0	0	0	1	0	0	1	0	0	0	0	0	0	0
24051	Sgcb	4	0	4	0	0.363636	0	0	0	0	1	1	0	0	0	1	1	0	0	0	0	0	0	0	0	0	0
20481	Ski	4	0	3	0	0.272727	0	0	0	0	1	0	0	0	0	1	0	0	0	1	1	0	0	0	0	0	0
74570	Zkscan1	4	0	4	0	0.363636	0	0	0	0	1	0	0	0	0	1	1	0	0	1	0	0	0	0	0	0	0
74840	Manf	4	0	4	0	0.363636	0	0	0	0	1	0	0	0	0	1	0	1	1	0	0	0	0	0	0	0	0
19024	Ppfibp2	4	0	4	0	0.363636	0	0	0	0	1	1	0	0	0	0	0	1	0	1	0	0	0	0	0	0	0
18631	Pex11a	4	0	4	0	0.363636	0	0	0	0	1	0	0	0	0	1	1	0	0	1	0	0	0	0	0	0	0
23942	Mta2	4	1	3	0.111111	0.272727	0	0	0	0	1	0	0	0	1	0	0	0	1	0	0	0	0	0	0	0	1
27081	Zfp275	4	0	4	0	0.363636	0	0	0	0	1	1	1	0	0	0	0	0	0	1	0	0	0	0	0	0	0
24000	Ptpn21	4	0	4	0	0.363636	0	0	0	0	1	1	0	0	1	0	0	0	0	1	0	0	0	0	0	0	0
53598	Dctn3	4	0	4	0	0.363636	0	0	0	0	1	0	0	0	0	1	1	0	1	0	0	0	0	0	0	0	0
69807	Trim32	4	0	4	0	0.363636	0	0	0	0	1	0	1	0	0	1	0	0	0	1	0	0	0	0	0	0	0
26936	Mprip	4	0	4	0	0.363636	0	0	0	0	1	1	0	0	0	1	0	0	0	1	0	0	0	0	0	0	0
98432	Phlpp1	4	0	4	0	0.363636	0	0	0	0	1	0	1	0	0	1	0	0	0	1	0	0	0	0	0	0	0
19655	Rbmx	4	0	4	0	0.363636	0	0	0	0	1	0	0	1	1	0	0	0	1	0	0	0	0	0	0	0	0
15374	Hn1	4	0	4	0	0.363636	0	0	0	0	1	0	0	0	1	0	0	1	1	0	0	0	0	0	0	0	0
54357	Epb4.1l4b	4	0	4	0	0.363636	0	0	0	0	1	1	0	0	0	0	1	0	0	1	0	0	0	0	0	0	0
67874	Rprm	4	0	4	0	0.363636	0	0	0	0	1	1	0	0	0	1	0	1	0	0	0	0	0	0	0	0	0
81840	Sorcs2	4	0	4	0	0.363636	0	0	0	0	1	0	1	0	0	1	0	0	0	1	0	0	0	0	0	0	0
76483	Lmf1	4	0	4	0	0.363636	0	0	0	0	1	1	0	0	1	1	0	0	0	0	0	0	0	0	0	0	0
66098	Chchd6	4	0	4	0	0.363636	0	0	0	0	1	1	1	0	0	1	0	0	0	0	0	0	0	0	0	0	0
59090	Midn	4	0	4	0	0.363636	0	0	0	0	1	1	0	0	0	1	0	0	1	0	0	0	0	0	0	0	0
27359	Sytl4	4	0	4	0	0.363636	0	0	0	0	1	1	0	0	0	0	0	1	0	1	0	0	0	0	0	0	0
26466	Zfp260	4	0	3	0	0.272727	0	0	0	0	1	0	0	0	0	0	1	1	0	0	1	0	0	0	0	0	0
11303	Abca1	4	0	4	0	0.363636	0	0	0	0	0	1	0	0	1	0	0	1	0	1	0	0	0	0	0	0	0
11512	Adcy6	4	0	4	0	0.363636	0	0	0	0	0	1	0	1	0	0	1	0	0	1	0	0	0	0	0	0	0
11767	Ap1m1	4	0	4	0	0.363636	0	0	0	0	0	1	0	0	1	0	0	1	1	0	0	0	0	0	0	0	0
11910	Atf3	4	0	4	0	0.363636	0	0	0	0	0	1	0	0	0	1	1	0	0	1	0	0	0	0	0	0	0
12091	Glb1	4	0	4	0	0.363636	0	0	0	0	0	1	0	0	1	0	0	1	1	0	0	0	0	0	0	0	0
12153	Bmp1	4	0	4	0	0.363636	0	0	0	0	0	1	0	0	1	1	0	1	0	0	0	0	0	0	0	0	0
13642	Efnb2	4	0	4	0	0.363636	0	0	0	0	0	1	0	0	1	0	0	0	1	1	0	0	0	0	0	0	0
14182	Fgfr1	4	1	3	0.111111	0.272727	0	0	0	0	0	1	0	0	1	0	0	1	0	0	0	0	0	0	0	0	1
14281	Fos	4	1	3	0.111111	0.272727	0	0	0	0	0	1	0	0	0	0	1	0	0	1	0	0	0	0	0	0	1
14958	H1f0	4	0	4	0	0.363636	0	0	0	0	0	1	0	0	1	0	1	0	1	0	0	0	0	0	0	0	0
15275	Hk1	4	0	4	0	0.363636	0	0	0	0	0	1	0	0	0	1	1	0	1	0	0	0	0	0	0	0	0
15975	Ifnar1	4	0	4	0	0.363636	0	0	0	0	0	1	0	0	1	0	0	1	1	0	0	0	0	0	0	0	0
16431	Itm2a	4	0	4	0	0.363636	0	0	0	0	0	1	0	0	0	1	0	0	1	1	0	0	0	0	0	0	0
16443	Itsn1	4	0	4	0	0.363636	0	0	0	0	0	1	0	0	0	0	0	1	1	1	0	0	0	0	0	0	0
17305	Mfng	4	0	4	0	0.363636	0	0	0	0	0	1	0	0	1	0	0	0	1	1	0	0	0	0	0	0	0
17475	Mpdz	4	0	4	0	0.363636	0	0	0	0	0	1	0	1	0	0	1	0	0	1	0	0	0	0	0	0	0
17937	Nab2	4	0	4	0	0.363636	0	0	0	0	0	1	0	0	1	0	0	1	0	1	0	0	0	0	0	0	0
18033	Nfkb1	4	1	3	0.111111	0.272727	0	0	0	0	0	1	0	0	1	0	0	0	1	0	0	0	0	0	0	0	1
19299	Abcd3	4	0	4	0	0.363636	0	0	0	0	0	1	0	0	1	0	1	1	0	0	0	0	0	0	0	0	0
19659	Rbp1	4	0	4	0	0.363636	0	0	0	0	0	1	0	0	1	0	0	0	1	1	0	0	0	0	0	0	0
19896	Rpl10a	4	0	4	0	0.363636	0	0	0	0	0	1	0	0	1	0	0	1	1	0	0	0	0	0	0	0	0
19989	Rpl7	4	0	4	0	0.363636	0	0	0	0	0	1	0	0	1	0	0	1	1	0	0	0	0	0	0	0	0
20042	Rps12	4	0	4	0	0.363636	0	0	0	0	0	1	0	0	1	0	1	0	1	0	0	0	0	0	0	0	0
20602	Ncor2	4	0	4	0	0.363636	0	0	0	0	0	1	1	0	1	0	0	1	0	0	0	0	0	0	0	0	0
20679	Sox6	4	0	4	0	0.363636	0	0	0	0	0	1	0	0	0	0	1	1	0	1	0	0	0	0	0	0	0
21664	Phlda1	4	0	4	0	0.363636	0	0	0	0	0	1	0	0	0	0	0	1	1	1	0	0	0	0	0	0	0
21927	Tnfaip1	4	0	4	0	0.363636	0	0	0	0	0	1	0	1	0	0	0	1	1	0	0	0	0	0	0	0	0
22319	Vamp3	4	0	4	0	0.363636	0	0	0	0	0	1	0	0	0	0	1	1	1	0	0	0	0	0	0	0	0
22751	Zfp90	4	0	4	0	0.363636	0	0	0	0	0	1	1	0	1	0	0	0	0	1	0	0	0	0	0	0	0
24135	Zfp68	4	0	4	0	0.363636	0	0	0	0	0	1	0	0	1	0	0	1	1	0	0	0	0	0	0	0	0
50498	Ebi3	4	0	4	0	0.363636	0	0	0	0	0	1	0	0	1	0	0	0	1	1	0	0	0	0	0	0	0
50875	Tmod3	4	0	4	0	0.363636	0	0	0	0	0	1	0	0	1	0	0	1	1	0	0	0	0	0	0	0	0
51885	Tubgcp4	4	0	4	0	0.363636	0	0	0	0	0	1	0	0	1	0	0	1	1	0	0	0	0	0	0	0	0
52468	Ctdsp2	4	0	4	0	0.363636	0	0	0	0	0	1	0	0	1	0	1	0	1	0	0	0	0	0	0	0	0
53869	Rab11a	4	0	4	0	0.363636	0	0	0	0	0	1	0	1	0	0	0	1	1	0	0	0	0	0	0	0	0
54217	Rpl36	4	0	4	0	0.363636	0	0	0	0	0	1	0	0	1	0	1	0	1	0	0	0	0	0	0	0	0
54393	Gabbr1	4	0	4	0	0.363636	0	0	0	0	0	1	1	0	0	1	0	0	0	1	0	0	0	0	0	0	0
55963	Slc1a4	4	0	4	0	0.363636	0	0	0	0	0	1	0	0	1	1	0	1	0	0	0	0	0	0	0	0	0
56294	Ptpn9	4	0	4	0	0.363636	0	0	0	0	0	1	0	1	0	0	0	1	1	0	0	0	0	0	0	0	0
57436	Gabarapl1	4	0	4	0	0.363636	0	0	0	0	0	1	0	0	0	1	1	0	0	1	0	0	0	0	0	0	0
59024	Med12	4	1	3	0.111111	0.272727	0	0	0	0	0	1	0	0	1	1	0	0	0	0	0	0	0	0	0	0	1
59052	Mettl9	4	0	4	0	0.363636	0	0	0	0	0	1	0	0	0	0	1	1	1	0	0	0	0	0	0	0	0
64294	Itm2c	4	0	4	0	0.363636	0	0	0	0	0	1	0	0	0	1	1	0	0	1	0	0	0	0	0	0	0
66055	Sf3b6	4	0	4	0	0.363636	0	0	0	0	0	1	0	0	1	0	0	1	1	0	0	0	0	0	0	0	0
66058	Tmem176a	4	0	4	0	0.363636	0	0	0	0	0	1	0	0	0	1	0	1	0	1	0	0	0	0	0	0	0
66970	Ssbp2	4	0	4	0	0.363636	0	0	0	0	0	1	0	1	1	0	0	0	0	1	0	0	0	0	0	0	0
67155	Smarca2	4	1	3	0.111111	0.272727	0	0	0	0	0	1	0	1	0	0	0	0	0	1	0	0	0	0	0	0	1
67416	Armcx2	4	0	4	0	0.363636	0	0	0	0	0	1	0	0	0	0	1	0	1	1	0	0	0	0	0	0	0
67615	Ube2r2	4	0	4	0	0.363636	0	0	0	0	0	1	0	0	1	0	1	0	1	0	0	0	0	0	0	0	0
68836	Mrpl52	4	0	4	0	0.363636	0	0	0	0	0	1	0	0	1	0	0	0	1	1	0	0	0	0	0	0	0
70984	4931406C07Rik	4	0	4	0	0.363636	0	0	0	0	0	1	0	0	1	0	0	1	0	1	0	0	0	0	0	0	0
71435	Arhgap21	4	0	4	0	0.363636	0	0	0	0	0	1	0	0	1	1	0	1	0	0	0	0	0	0	0	0	0
74551	Pck2	4	0	4	0	0.363636	0	0	0	0	0	1	1	0	1	0	0	0	0	1	0	0	0	0	0	0	0
74841	Usp38	4	0	4	0	0.363636	0	0	0	0	0	1	0	0	1	0	0	1	1	0	0	0	0	0	0	0	0
83669	Wdr6	4	0	4	0	0.363636	0	0	0	0	0	1	0	0	1	0	1	1	0	0	0	0	0	0	0	0	0
15312	Hmgn1	4	0	4	0	0.363636	0	0	0	0	0	0	1	0	1	0	0	1	1	0	0	0	0	0	0	0	0
13839	Epha5	4	0	4	0	0.363636	0	0	0	0	0	0	0	1	0	0	0	1	1	1	0	0	0	0	0	0	0
27528	Nrep	4	0	4	0	0.363636	0	0	0	0	0	0	0	1	1	0	1	0	0	1	0	0	0	0	0	0	0
17150	Mfap2	4	0	4	0	0.363636	0	0	0	0	0	0	0	1	1	1	0	0	1	0	0	0	0	0	0	0	0
11489	Adam12	4	0	4	0	0.363636	0	0	0	0	0	0	0	0	1	0	1	1	1	0	0	0	0	0	0	0	0
11535	Adm	4	0	4	0	0.363636	0	0	0	0	0	0	0	0	1	1	0	1	0	1	0	0	0	0	0	0	0
12140	Fabp7	4	0	4	0	0.363636	0	0	0	0	0	0	0	0	1	1	1	0	1	0	0	0	0	0	0	0	0
12366	Casp2	4	0	4	0	0.363636	0	0	0	0	0	0	0	0	1	0	1	1	1	0	0	0	0	0	0	0	0
13167	Dbi	4	0	4	0	0.363636	0	0	0	0	0	0	0	0	1	1	1	1	0	0	0	0	0	0	0	0	0
13865	Nr2f1	4	1	3	0.111111	0.272727	0	0	0	0	0	0	0	0	1	0	0	0	1	1	0	0	0	0	0	0	1
14678	Gnai2	4	0	4	0	0.363636	0	0	0	0	0	0	0	0	1	0	1	1	1	0	0	0	0	0	0	0	0
16993	Lta4h	4	0	4	0	0.363636	0	0	0	0	0	0	0	0	1	0	1	1	1	0	0	0	0	0	0	0	0
17387	Mmp14	4	0	4	0	0.363636	0	0	0	0	0	0	0	0	1	0	1	1	1	0	0	0	0	0	0	0	0
19035	Ppib	4	0	4	0	0.363636	0	0	0	0	0	0	0	0	1	0	1	1	1	0	0	0	0	0	0	0	0
19241	Tmsb4x	4	0	3	0	0.272727	0	0	0	0	0	0	0	0	1	0	1	0	1	0	1	0	0	0	0	0	0
19899	Rpl18	4	0	4	0	0.363636	0	0	0	0	0	0	0	0	1	1	1	0	1	0	0	0	0	0	0	0	0
20194	S100a10	4	0	3	0	0.272727	0	0	0	0	0	0	0	0	1	0	1	0	1	0	1	0	0	0	0	0	0
20430	Cyfip1	4	0	4	0	0.363636	0	0	0	0	0	0	0	0	1	0	1	1	1	0	0	0	0	0	0	0	0
20666	Sox11	4	0	4	0	0.363636	0	0	0	0	0	0	0	0	1	1	0	1	1	0	0	0	0	0	0	0	0
22166	Txn1	4	0	4	0	0.363636	0	0	0	0	0	0	0	0	1	0	0	1	1	1	0	0	0	0	0	0	0
22235	Ugdh	4	0	4	0	0.363636	0	0	0	0	0	0	0	0	1	0	0	1	1	1	0	0	0	0	0	0	0
29806	Limd1	4	0	4	0	0.363636	0	0	0	0	0	0	0	0	1	0	1	1	1	0	0	0	0	0	0	0	0
30794	Pdlim4	4	0	3	0	0.272727	0	0	0	0	0	0	0	0	1	1	1	0	0	0	1	0	0	0	0	0	0
66212	Sec61b	4	0	4	0	0.363636	0	0	0	0	0	0	0	0	1	1	1	0	1	0	0	0	0	0	0	0	0
66925	Sdhd	4	0	4	0	0.363636	0	0	0	0	0	0	0	0	1	1	0	1	1	0	0	0	0	0	0	0	0
68090	Yif1a	4	0	4	0	0.363636	0	0	0	0	0	0	0	0	1	1	1	0	1	0	0	0	0	0	0	0	0
73836	Slc35b2	4	0	4	0	0.363636	0	0	0	0	0	0	0	0	1	0	1	1	1	0	0	0	0	0	0	0	0
76281	Tax1bp3	4	0	4	0	0.363636	0	0	0	0	0	0	0	0	1	0	1	1	1	0	0	0	0	0	0	0	0
78889	Wsb1	4	0	4	0	0.363636	0	0	0	0	0	0	0	0	1	0	1	1	1	0	0	0	0	0	0	0	0
66576	Uqcrh	4	0	4	0	0.363636	0	0	0	0	0	0	0	0	0	1	1	1	1	0	0	0	0	0	0	0	0
11609	Agtr2	3	1	2	0.111111	0.181818	0	0	0	1	0	0	0	0	0	0	0	0	0	1	0	0	0	0	0	1	0
12151	Bmi1	3	0	3	0	0.272727	0	0	0	0	0	1	0	0	0	0	0	1	0	0	0	0	0	0	0	1	0
12490	Cd34	3	0	3	0	0.272727	0	0	0	0	1	0	0	0	0	0	0	0	0	1	0	0	0	0	0	1	0
12505	Cd44	3	1	2	0.111111	0.181818	0	0	0	0	0	0	1	0	0	0	0	0	0	0	0	0	0	0	0	1	1
12571	Cdk6	3	0	3	0	0.272727	0	0	0	0	1	0	1	0	0	0	0	0	0	0	0	0	0	0	0	1	0
12578	Cdkn2a	3	2	1	0.222222	0.0909091	0	0	0	1	0	0	0	0	0	0	0	0	0	0	0	0	0	0	0	1	1
12580	Cdkn2c	3	0	3	0	0.272727	0	0	0	0	0	0	0	0	1	0	0	1	0	0	0	0	0	0	0	1	0
12631	Cfl1	3	0	3	0	0.272727	0	0	0	0	0	0	0	0	0	0	0	1	1	0	0	0	0	0	0	1	0
12778	Ackr3	3	0	3	0	0.272727	0	0	0	0	0	0	0	0	0	1	0	0	1	0	0	0	0	0	0	1	0
13003	Vcan	3	0	3	0	0.272727	0	0	0	0	0	0	0	0	1	0	0	0	1	0	0	0	0	0	0	1	0
13380	Dkk1	3	2	1	0.222222	0.0909091	1	0	0	0	0	0	0	0	0	0	0	0	0	0	0	0	0	0	0	1	1
13555	E2f1	3	0	3	0	0.272727	0	0	0	0	0	0	0	0	1	0	0	0	1	0	0	0	0	0	0	1	0
14055	Ezh1	3	1	2	0.111111	0.181818	0	0	0	0	0	1	0	0	0	0	0	0	0	0	0	0	0	0	0	1	1
14357	Dtx1	3	0	3	0	0.272727	0	0	0	0	0	0	0	0	1	1	0	0	0	0	0	0	0	0	0	1	0
14433	Gapdh	3	1	2	0.111111	0.181818	1	0	0	0	0	0	0	0	1	0	0	0	0	0	0	0	0	0	0	1	0
14581	Gfi1	3	1	2	0.111111	0.181818	1	0	0	0	0	0	0	0	0	0	0	0	1	0	0	0	0	0	0	1	0
14615	Gjc1	3	0	3	0	0.272727	0	0	0	0	0	0	0	0	0	0	0	1	1	0	0	0	0	0	0	1	0
15404	Hoxa7	3	1	2	0.111111	0.181818	0	0	0	0	0	1	0	0	0	0	0	0	0	0	0	0	1	0	0	1	0
16001	Igf1r	3	1	2	0.111111	0.181818	0	0	0	0	0	0	0	0	1	0	0	0	0	0	0	0	0	1	0	1	0
16400	Itga3	3	1	2	0.111111	0.181818	1	0	0	0	0	1	0	0	0	0	0	0	0	0	0	0	0	0	0	1	0
16477	Junb	3	0	3	0	0.272727	0	0	0	0	0	1	0	0	0	0	0	0	0	1	0	0	0	0	0	1	0
17342	Mitf	3	1	2	0.111111	0.181818	0	0	0	0	0	0	0	0	0	0	0	0	0	1	0	0	0	0	0	1	1
17392	Mmp3	3	2	1	0.222222	0.0909091	0	0	1	1	0	0	0	0	0	0	0	0	0	0	0	0	0	0	0	1	0
17863	Myb	3	0	3	0	0.272727	0	0	0	0	0	0	0	0	1	0	0	0	1	0	0	0	0	0	0	1	0
18641	Pfkl	3	1	2	0.111111	0.181818	0	0	0	1	0	0	0	0	1	0	0	0	0	0	0	0	0	0	0	1	0
18746	Pkm	3	0	3	0	0.272727	0	0	0	0	0	0	0	0	1	0	0	1	0	0	0	0	0	0	0	1	0
19211	Pten	3	2	1	0.222222	0.0909091	0	0	0	0	0	0	0	0	0	0	0	0	0	0	0	1	0	0	0	1	1
19225	Ptgs2	3	1	2	0.111111	0.181818	0	0	0	1	0	0	0	0	0	0	0	0	0	1	0	0	0	0	0	1	0
19645	Rb1	3	0	3	0	0.272727	0	0	0	0	0	0	0	0	1	0	0	1	0	0	0	0	0	0	0	1	0
19699	Reln	3	0	3	0	0.272727	0	0	0	0	0	0	0	0	1	0	0	0	0	1	0	0	0	0	0	1	0
20315	Cxcl12	3	1	2	0.111111	0.181818	0	0	0	1	0	0	0	0	0	0	0	0	0	1	0	0	0	0	0	1	0
20319	Sfrp2	3	0	3	0	0.272727	0	0	0	0	0	1	0	0	0	0	0	0	1	0	0	0	0	0	0	1	0
20344	Selp	3	0	3	0	0.272727	0	0	0	0	0	1	0	0	0	0	0	0	0	1	0	0	0	0	0	1	0
21349	Tal1	3	0	3	0	0.272727	0	0	0	0	0	1	0	0	0	0	0	0	0	1	0	0	0	0	0	1	0
21808	Tgfb2	3	0	3	0	0.272727	0	0	0	0	0	0	0	0	0	1	1	0	0	0	0	0	0	0	0	1	0
22329	Vcam1	3	0	3	0	0.272727	0	0	0	0	0	0	0	1	0	0	0	0	0	1	0	0	0	0	0	1	0
22658	Pcgf2	3	1	2	0.111111	0.181818	1	0	0	0	0	1	0	0	0	0	0	0	0	0	0	0	0	0	0	1	0
51813	Ccnc	3	1	2	0.111111	0.181818	0	0	0	1	0	0	0	0	0	0	0	1	0	0	0	0	0	0	0	1	0
56637	Gsk3b	3	1	2	0.111111	0.181818	0	0	0	0	0	0	0	0	0	0	1	0	0	0	0	0	0	0	0	1	1
57266	Cxcl14	3	0	3	0	0.272727	0	0	0	0	1	0	0	0	0	0	0	0	0	1	0	0	0	0	0	1	0
66711	Sbds	3	1	2	0.111111	0.181818	1	0	0	0	0	1	0	0	0	0	0	0	0	0	0	0	0	0	0	1	0
67397	Erp29	3	0	3	0	0.272727	0	0	0	0	1	0	0	0	0	0	0	0	1	0	0	0	0	0	0	1	0
104263	Kdm3a	3	1	2	0.111111	0.181818	0	0	0	0	0	0	0	0	0	0	1	0	0	0	0	0	0	0	0	1	1
76246	Rtf1	3	2	1	0.222222	0.0909091	0	0	1	0	0	0	0	0	0	1	0	0	0	0	0	1	0	0	0	0	0
56357	Ivd	3	1	2	0.111111	0.181818	0	0	0	0	0	0	1	0	0	1	0	0	0	0	0	1	0	0	0	0	0
57258	Xpo4	3	2	1	0.222222	0.0909091	0	0	0	0	1	0	0	0	0	0	0	0	0	0	0	1	0	0	0	0	1
140858	Wdr5	3	3	0	0.333333	0	0	0	1	0	0	0	0	0	0	0	0	0	0	0	0	1	0	0	1	0	0
76044	Ncapg2	3	3	0	0.333333	0	0	0	1	0	0	0	0	0	0	0	0	0	0	0	0	1	1	0	0	0	0
72480	Tspyl4	3	1	2	0.111111	0.181818	0	0	0	0	0	0	0	1	0	1	0	0	0	0	0	1	0	0	0	0	0
18762	Prkcz	3	2	1	0.222222	0.0909091	0	0	1	0	0	0	0	0	0	1	0	0	0	0	0	1	0	0	0	0	0
51869	Rif1	3	3	0	0.333333	0	0	0	0	0	0	0	0	0	0	0	0	0	0	0	0	1	1	0	0	0	1
19027	Sypl	3	1	2	0.111111	0.181818	0	0	0	0	0	0	0	0	0	0	1	1	0	0	0	1	0	0	0	0	0
59027	Nampt	3	2	1	0.222222	0.0909091	0	0	0	1	0	0	0	0	0	0	0	1	0	0	0	1	0	0	0	0	0
53317	Plrg1	3	2	1	0.222222	0.0909091	1	0	0	0	0	0	0	0	0	0	0	0	1	0	0	1	0	0	0	0	0
74778	Rrp7a	3	1	2	0.111111	0.181818	0	0	0	0	0	1	0	0	0	0	0	0	1	0	0	1	0	0	0	0	0
18708	Pik3r1	3	1	2	0.111111	0.181818	0	0	0	0	0	1	0	0	0	0	0	0	1	0	0	1	0	0	0	0	0
13684	Eif4e	3	2	1	0.222222	0.0909091	0	0	0	1	0	0	0	0	0	0	0	1	0	0	0	1	0	0	0	0	0
15115	Hars	3	2	1	0.222222	0.0909091	0	0	0	1	0	0	0	0	0	0	0	1	0	0	0	1	0	0	0	0	0
65099	Irak1bp1	3	2	1	0.222222	0.0909091	0	0	1	0	0	0	0	0	0	1	0	0	0	0	0	1	0	0	0	0	0
11630	Aim1	3	1	2	0.111111	0.181818	1	0	0	0	0	1	0	0	0	0	0	0	0	1	0	0	0	0	0	0	0
11640	Akap1	3	2	1	0.222222	0.0909091	1	0	1	0	0	0	0	0	0	1	0	0	0	0	0	0	0	0	0	0	0
11677	Akr1b3	3	2	1	0.222222	0.0909091	1	0	0	1	0	1	0	0	0	0	0	0	0	0	0	0	0	0	0	0	0
11745	Anxa3	3	1	2	0.111111	0.181818	1	0	0	0	0	0	0	0	1	0	0	1	0	0	0	0	0	0	0	0	0
11765	Ap1g1	3	2	1	0.222222	0.0909091	1	0	1	0	0	0	0	0	0	0	0	1	0	0	0	0	0	0	0	0	0
11799	Birc5	3	1	2	0.111111	0.181818	1	0	0	0	0	0	0	0	0	0	0	1	1	0	0	0	0	0	0	0	0
11819	Nr2f2	3	2	1	0.222222	0.0909091	1	0	0	0	0	0	0	0	0	0	0	0	1	0	0	0	0	0	0	0	1
11821	Aprt	3	1	2	0.111111	0.181818	1	0	0	0	0	0	0	0	0	0	0	1	1	0	0	0	0	0	0	0	0
11946	Atp5a1	3	1	2	0.111111	0.181818	1	0	0	0	0	0	0	0	0	0	0	1	1	0	0	0	0	0	0	0	0
12005	Axin1	3	2	1	0.222222	0.0909091	1	0	0	0	0	1	0	0	0	0	0	0	0	0	0	0	0	0	0	0	1
12125	Bcl2l11	3	1	2	0.111111	0.181818	1	0	0	0	0	0	0	0	0	0	1	0	1	0	0	0	0	0	0	0	0
12166	Bmpr1a	3	2	1	0.222222	0.0909091	1	0	0	1	0	0	0	0	0	0	0	1	0	0	0	0	0	0	0	0	0
12181	Bop1	3	1	2	0.111111	0.181818	1	0	0	0	0	0	0	0	0	0	0	1	1	0	0	0	0	0	0	0	0
12488	Cd2ap	3	2	1	0.222222	0.0909091	1	0	0	1	0	0	0	0	0	0	0	0	1	0	0	0	0	0	0	0	0
12527	Cd9	3	1	2	0.111111	0.181818	1	0	0	0	0	0	0	0	0	0	1	1	0	0	0	0	0	0	0	0	0
12537	Cdk11b	3	2	1	0.222222	0.0909091	1	0	0	0	0	1	0	0	0	0	0	0	0	0	0	0	0	1	0	0	0
13177	Eci1	3	1	2	0.111111	0.181818	1	0	0	0	0	1	0	0	0	0	0	0	1	0	0	0	0	0	0	0	0
13206	Ddx4	3	3	0	0.333333	0	1	0	1	1	0	0	0	0	0	0	0	0	0	0	0	0	0	0	0	0	0
13361	Dhfr	3	1	2	0.111111	0.181818	1	0	0	0	0	0	0	0	0	0	0	1	1	0	0	0	0	0	0	0	0
13498	Atn1	3	2	1	0.222222	0.0909091	1	0	0	1	0	1	0	0	0	0	0	0	0	0	0	0	0	0	0	0	0
13590	Lefty1	3	3	0	0.333333	0	1	0	0	1	0	0	0	0	0	0	0	0	0	0	0	0	0	0	0	0	1
13660	Ehd1	3	1	2	0.111111	0.181818	1	0	0	0	0	0	0	0	1	0	0	0	1	0	0	0	0	0	0	0	0
13680	Ddx19a	3	1	2	0.111111	0.181818	1	0	0	0	0	0	0	0	1	0	0	0	1	0	0	0	0	0	0	0	0
14063	F2rl1	3	2	1	0.222222	0.0909091	1	0	1	0	1	0	0	0	0	0	0	0	0	0	0	0	0	0	0	0	0
14084	Faf1	3	2	1	0.222222	0.0909091	1	0	0	1	0	0	0	0	0	0	0	1	0	0	0	0	0	0	0	0	0
14275	Folr1	3	3	0	0.333333	0	1	0	1	1	0	0	0	0	0	0	0	0	0	0	0	0	0	0	0	0	0
14287	Fpgs	3	2	1	0.222222	0.0909091	1	0	1	0	1	0	0	0	0	0	0	0	0	0	0	0	0	0	0	0	0
14425	Galnt3	3	2	1	0.222222	0.0909091	1	0	0	1	0	1	0	0	0	0	0	0	0	0	0	0	0	0	0	0	0
14469	Gbp2	3	1	2	0.111111	0.181818	1	0	0	0	0	1	0	0	0	0	0	0	0	1	0	0	0	0	0	0	0
14562	Gdf3	3	3	0	0.333333	0	1	1	0	1	0	0	0	0	0	0	0	0	0	0	0	0	0	0	0	0	0
14725	Lrp2	3	3	0	0.333333	0	1	0	1	1	0	0	0	0	0	0	0	0	0	0	0	0	0	0	0	0	0
14734	Gpc3	3	3	0	0.333333	0	1	0	1	1	0	0	0	0	0	0	0	0	0	0	0	0	0	0	0	0	0
14747	Cmklr1	3	1	2	0.111111	0.181818	1	0	0	0	0	0	0	0	1	0	0	0	1	0	0	0	0	0	0	0	0
15161	Hcfc1	3	2	1	0.222222	0.0909091	1	0	0	0	0	0	0	0	0	0	0	0	1	0	0	0	0	0	0	0	1
15377	Foxa3	3	1	2	0.111111	0.181818	1	0	0	0	0	1	0	0	0	0	0	0	0	1	0	0	0	0	0	0	0
15388	Hnrnpl	3	2	1	0.222222	0.0909091	1	0	1	0	0	0	0	0	0	0	0	0	1	0	0	0	0	0	0	0	0
15525	Hspa4	3	2	1	0.222222	0.0909091	1	0	0	1	0	0	0	0	0	0	0	1	0	0	0	0	0	0	0	0	0
16010	Igfbp4	3	1	2	0.111111	0.181818	1	0	0	0	0	0	0	0	0	0	1	0	1	0	0	0	0	0	0	0	0
16019	Ighm	3	1	2	0.111111	0.181818	1	0	0	0	0	0	0	0	1	0	0	1	0	0	0	0	0	0	0	0	0
16168	Il15	3	1	2	0.111111	0.181818	1	0	0	0	0	1	0	0	0	0	0	0	0	1	0	0	0	0	0	0	0
16418	Eif6	3	2	1	0.222222	0.0909091	1	0	0	1	0	0	0	0	0	0	0	0	1	0	0	0	0	0	0	0	0
16456	F11r	3	2	1	0.222222	0.0909091	1	0	0	1	0	1	0	0	0	0	0	0	0	0	0	0	0	0	0	0	0
16588	Kin	3	1	2	0.111111	0.181818	1	0	0	0	0	0	0	0	0	0	0	1	1	0	0	0	0	0	0	0	0
16624	Klk1b8	3	1	2	0.111111	0.181818	1	0	0	0	0	1	0	0	1	0	0	0	0	0	0	0	0	0	0	0	0
16691	Krt8	3	2	1	0.222222	0.0909091	1	0	0	1	0	1	0	0	0	0	0	0	0	0	0	0	0	0	0	0	0
16907	Lmnb2	3	1	2	0.111111	0.181818	1	0	0	0	0	0	0	0	0	0	0	1	1	0	0	0	0	0	0	0	0
16994	Ltb	3	1	2	0.111111	0.181818	1	0	0	0	0	1	0	0	0	0	0	0	0	1	0	0	0	0	0	0	0
17075	Epcam	3	3	0	0.333333	0	1	0	1	1	0	0	0	0	0	0	0	0	0	0	0	0	0	0	0	0	0
17165	Mapkapk5	3	2	1	0.222222	0.0909091	1	0	0	1	0	1	0	0	0	0	0	0	0	0	0	0	0	0	0	0	0
17279	Melk	3	2	1	0.222222	0.0909091	1	0	0	1	0	0	0	0	0	0	0	1	0	0	0	0	0	0	0	0	0
17681	Msc	3	3	0	0.333333	0	1	0	1	1	0	0	0	0	0	0	0	0	0	0	0	0	0	0	0	0	0
18045	Nfyb	3	2	1	0.222222	0.0909091	1	0	0	1	0	0	0	0	0	0	0	0	1	0	0	0	0	0	0	0	0
18046	Nfyc	3	1	2	0.111111	0.181818	1	0	0	0	0	1	0	0	0	0	0	0	1	0	0	0	0	0	0	0	0
18108	Nmt2	3	2	1	0.222222	0.0909091	1	0	0	1	0	0	0	0	0	0	0	0	1	0	0	0	0	0	0	0	0
18260	Ocln	3	2	1	0.222222	0.0909091	1	0	0	0	1	0	0	0	0	0	0	0	0	0	0	0	0	0	0	0	1
18393	Orc2	3	2	1	0.222222	0.0909091	1	0	1	0	0	0	0	0	0	0	0	0	1	0	0	0	0	0	0	0	0
18639	Pfkfb1	3	3	0	0.333333	0	1	0	0	1	0	0	0	0	0	0	0	0	0	0	0	0	0	1	0	0	0
18712	Pim1	3	2	1	0.222222	0.0909091	1	0	0	0	0	0	0	0	0	0	0	0	1	0	0	0	0	0	0	0	1
18741	Pitx2	3	2	1	0.222222	0.0909091	1	0	0	1	0	1	0	0	0	0	0	0	0	0	0	0	0	0	0	0	0
18854	Pml	3	3	0	0.333333	0	1	0	0	1	0	0	0	0	0	0	0	0	0	0	0	0	0	0	0	0	1
19076	Prim2	3	1	2	0.111111	0.181818	1	0	0	0	0	0	0	0	0	0	0	1	1	0	0	0	0	0	0	0	0
19110	Prl4a1	3	1	2	0.111111	0.181818	1	0	0	0	0	0	0	0	1	0	0	0	1	0	0	0	0	0	0	0	0
19166	Psma2	3	2	1	0.222222	0.0909091	1	0	0	1	0	0	0	0	0	0	0	0	1	0	0	0	0	0	0	0	0
19182	Psmc3	3	1	2	0.111111	0.181818	1	0	0	0	0	0	0	0	0	0	0	1	1	0	0	0	0	0	0	0	0
19184	Psmc5	3	2	1	0.222222	0.0909091	1	0	0	1	0	0	0	0	0	0	0	1	0	0	0	0	0	0	0	0	0
19192	Psme3	3	1	2	0.111111	0.181818	1	0	0	0	0	0	0	0	0	0	0	1	1	0	0	0	0	0	0	0	0
19231	Ptma	3	1	2	0.111111	0.181818	1	0	0	0	0	0	0	0	1	0	0	0	1	0	0	0	0	0	0	0	0
19249	Ptpn13	3	1	2	0.111111	0.181818	1	0	0	0	0	0	0	0	0	1	0	0	1	0	0	0	0	0	0	0	0
19271	Ptprj	3	1	2	0.111111	0.181818	1	0	0	0	0	0	0	0	0	0	1	1	0	0	0	0	0	0	0	0	0
19356	Rad17	3	2	1	0.222222	0.0909091	1	0	0	1	0	0	0	0	0	0	0	1	0	0	0	0	0	0	0	0	0
19362	Rad51ap1	3	1	2	0.111111	0.181818	1	0	0	0	0	0	0	0	1	0	0	0	1	0	0	0	0	0	0	0	0
19387	Rangap1	3	1	2	0.111111	0.181818	1	0	0	0	0	0	0	0	0	0	0	1	1	0	0	0	0	0	0	0	0
19691	Recql	3	1	2	0.111111	0.181818	1	0	0	0	0	0	0	0	0	0	0	1	1	0	0	0	0	0	0	0	0
20022	Polr2j	3	1	2	0.111111	0.181818	1	0	0	0	0	0	0	0	0	1	0	0	1	0	0	0	0	0	0	0	0
20085	Rps19	3	1	2	0.111111	0.181818	1	0	0	0	0	0	0	0	1	0	0	0	1	0	0	0	0	0	0	0	0
20111	Rps6ka1	3	1	2	0.111111	0.181818	1	0	0	0	0	0	0	0	1	0	0	1	0	0	0	0	0	0	0	0	0
20347	Sema3b	3	1	2	0.111111	0.181818	1	0	0	0	0	0	1	0	0	0	1	0	0	0	0	0	0	0	0	0	0
20382	Srsf2	3	1	2	0.111111	0.181818	1	0	0	0	0	0	0	0	1	0	0	0	1	0	0	0	0	0	0	0	0
20479	Vps4b	3	1	2	0.111111	0.181818	1	0	0	0	0	0	0	0	0	0	0	1	1	0	0	0	0	0	0	0	0
20499	Slc12a7	3	1	2	0.111111	0.181818	1	0	0	0	0	1	0	0	1	0	0	0	0	0	0	0	0	0	0	0	0
20515	Slc20a1	3	2	1	0.222222	0.0909091	1	0	0	1	0	1	0	0	0	0	0	0	0	0	0	0	0	0	0	0	0
20540	Slc7a7	3	3	0	0.333333	0	1	0	1	1	0	0	0	0	0	0	0	0	0	0	0	0	0	0	0	0	0
20588	Smarcc1	3	2	1	0.222222	0.0909091	1	0	0	0	0	0	0	0	0	0	0	0	1	0	0	0	0	0	0	0	1
20643	Snrpe	3	1	2	0.111111	0.181818	1	0	0	0	0	0	0	0	1	0	0	0	1	0	0	0	0	0	0	0	0
20732	Spint1	3	3	0	0.333333	0	1	0	1	1	0	0	0	0	0	0	0	0	0	0	0	0	0	0	0	0	0
20932	Surf4	3	2	1	0.222222	0.0909091	1	0	0	1	0	1	0	0	0	0	0	0	0	0	0	0	0	0	0	0	0
20935	Surf6	3	2	1	0.222222	0.0909091	1	0	0	1	0	1	0	0	0	0	0	0	0	0	0	0	0	0	0	0	0
21339	Taf1a	3	2	1	0.222222	0.0909091	1	0	0	1	0	1	0	0	0	0	0	0	0	0	0	0	0	0	0	0	0
21354	Tap1	3	1	2	0.111111	0.181818	1	0	0	0	0	1	0	0	1	0	0	0	0	0	0	0	0	0	0	0	0
21401	Tcea3	3	3	0	0.333333	0	1	1	1	0	0	0	0	0	0	0	0	0	0	0	0	0	0	0	0	0	0
21414	Tcf7	3	2	1	0.222222	0.0909091	1	0	0	0	0	0	1	0	0	0	0	0	0	0	0	0	0	0	0	0	1
21853	Timeless	3	1	2	0.111111	0.181818	1	0	0	0	0	0	1	0	0	0	0	0	1	0	0	0	0	0	0	0	0
21973	Top2a	3	1	2	0.111111	0.181818	1	0	0	0	0	0	0	0	1	0	0	0	1	0	0	0	0	0	0	0	0
22029	Traf1	3	1	2	0.111111	0.181818	1	0	0	0	0	1	0	0	0	0	0	0	0	1	0	0	0	0	0	0	0
22037	Trap1a	3	2	1	0.222222	0.0909091	1	0	0	1	0	1	0	0	0	0	0	0	0	0	0	0	0	0	0	0	0
22044	Trh	3	3	0	0.333333	0	1	0	1	1	0	0	0	0	0	0	0	0	0	0	0	0	0	0	0	0	0
22122	Tsta3	3	1	2	0.111111	0.181818	1	0	0	0	0	1	0	0	0	0	0	1	0	0	0	0	0	0	0	0	0
22196	Ube2i	3	2	1	0.222222	0.0909091	1	0	0	0	0	1	0	0	0	0	0	0	0	0	0	0	0	0	0	0	1
22350	Ezr	3	1	2	0.111111	0.181818	1	0	0	0	0	0	0	0	1	0	0	0	1	0	0	0	0	0	0	0	0
22652	Mkrn3	3	1	2	0.111111	0.181818	1	0	0	0	0	0	0	0	1	0	0	0	1	0	0	0	0	0	0	0	0
22759	Zfp97	3	2	1	0.222222	0.0909091	1	0	0	1	0	1	0	0	0	0	0	0	0	0	0	0	0	0	0	0	0
23872	Ets2	3	2	1	0.222222	0.0909091	1	0	0	1	0	0	0	0	0	0	0	0	0	1	0	0	0	0	0	0	0
23939	Mapk7	3	1	2	0.111111	0.181818	1	0	0	0	0	0	0	0	1	0	0	0	1	0	0	0	0	0	0	0	0
24030	Mrps12	3	1	2	0.111111	0.181818	1	0	0	0	0	1	0	0	1	0	0	0	0	0	0	0	0	0	0	0	0
24047	Ccl19	3	2	1	0.222222	0.0909091	1	0	0	1	0	0	0	0	0	0	0	1	0	0	0	0	0	0	0	0	0
26385	Grk6	3	2	1	0.222222	0.0909091	1	0	0	0	0	0	0	0	0	0	0	0	1	0	0	0	1	0	0	0	0
26429	Orc5	3	2	1	0.222222	0.0909091	1	0	0	1	0	1	0	0	0	0	0	0	0	0	0	0	0	0	0	0	0
26441	Psma4	3	2	1	0.222222	0.0909091	1	0	0	1	0	0	0	0	0	0	0	0	1	0	0	0	0	0	0	0	0
26908	Eif2s3y	3	1	2	0.111111	0.181818	1	0	0	0	0	0	0	0	1	0	0	0	1	0	0	0	0	0	0	0	0
27050	Rps3	3	1	2	0.111111	0.181818	1	0	0	0	0	0	0	0	1	0	0	0	1	0	0	0	0	0	0	0	0
27054	Sec23b	3	2	1	0.222222	0.0909091	1	0	0	1	0	0	0	0	0	0	0	1	0	0	0	0	0	0	0	0	0
27395	Mrpl15	3	2	1	0.222222	0.0909091	1	0	0	1	0	0	0	0	0	0	0	0	1	0	0	0	0	0	0	0	0
27398	Mrpl2	3	1	2	0.111111	0.181818	1	0	0	0	0	0	0	0	0	0	0	1	1	0	0	0	0	0	0	0	0
28015	Polr2m	3	2	1	0.222222	0.0909091	1	0	1	0	0	0	0	0	0	0	0	0	1	0	0	0	0	0	0	0	0
28030	Gfm1	3	2	1	0.222222	0.0909091	1	0	0	1	0	0	0	0	0	0	0	1	0	0	0	0	0	0	0	0	0
28035	Usp39	3	2	1	0.222222	0.0909091	1	0	0	0	0	0	0	0	0	0	0	1	0	0	0	0	0	0	1	0	0
29857	Mapk12	3	1	2	0.111111	0.181818	1	0	0	0	0	1	0	0	1	0	0	0	0	0	0	0	0	0	0	0	0
30933	Tor2a	3	1	2	0.111111	0.181818	1	0	0	0	0	1	0	0	0	0	0	1	0	0	0	0	0	0	0	0	0
30934	Tor1b	3	1	2	0.111111	0.181818	1	0	0	0	0	1	0	0	0	0	0	1	0	0	0	0	0	0	0	0	0
30946	Abt1	3	2	1	0.222222	0.0909091	1	0	0	1	0	0	0	0	0	0	0	0	1	0	0	0	0	0	0	0	0
53323	Ube2k	3	2	1	0.222222	0.0909091	1	0	0	1	0	0	0	0	0	0	0	1	0	0	0	0	0	0	0	0	0
53607	Snrpa	3	1	2	0.111111	0.181818	1	0	0	0	0	0	0	0	1	0	0	0	1	0	0	0	0	0	0	0	0
53817	Ddx39b	3	1	2	0.111111	0.181818	1	0	0	0	0	0	0	0	0	0	0	1	1	0	0	0	0	0	0	0	0
54135	Lsr	3	2	1	0.222222	0.0909091	1	0	1	0	0	1	0	0	0	0	0	0	0	0	0	0	0	0	0	0	0
54139	Irf6	3	1	2	0.111111	0.181818	1	0	0	0	0	1	0	0	0	0	0	0	0	1	0	0	0	0	0	0	0
54188	Cpsf4	3	1	2	0.111111	0.181818	1	0	0	0	0	0	0	0	1	0	0	0	1	0	0	0	0	0	0	0	0
54369	Nme6	3	2	1	0.222222	0.0909091	1	0	0	0	0	0	0	0	0	0	0	0	1	0	0	0	0	1	0	0	0
54378	Cacng6	3	2	1	0.222222	0.0909091	1	0	0	1	0	0	0	0	0	0	0	0	1	0	0	0	0	0	0	0	0
54387	Mcm3ap	3	2	1	0.222222	0.0909091	1	0	1	0	0	1	0	0	0	0	0	0	0	0	0	0	0	0	0	0	0
54484	Mkrn1	3	3	0	0.333333	0	1	1	0	1	0	0	0	0	0	0	0	0	0	0	0	0	0	0	0	0	0
54644	Otud5	3	1	2	0.111111	0.181818	1	0	0	0	0	1	0	0	0	0	0	0	1	0	0	0	0	0	0	0	0
56187	Rabggta	3	2	1	0.222222	0.0909091	1	0	1	0	1	0	0	0	0	0	0	0	0	0	0	0	0	0	0	0	0
56419	Diap3	3	1	2	0.111111	0.181818	1	0	0	0	0	0	0	0	1	0	0	0	1	0	0	0	0	0	0	0	0
56431	Dstn	3	2	1	0.222222	0.0909091	1	0	0	1	0	0	0	0	0	0	0	0	1	0	0	0	0	0	0	0	0
56470	Rgs19	3	1	2	0.111111	0.181818	1	0	0	0	0	0	0	0	0	0	0	1	1	0	0	0	0	0	0	0	0
57320	Park7	3	2	1	0.222222	0.0909091	1	0	0	1	0	0	0	0	0	0	0	1	0	0	0	0	0	0	0	0	0
57785	Rangrf	3	2	1	0.222222	0.0909091	1	0	0	1	0	0	0	0	1	0	0	0	0	0	0	0	0	0	0	0	0
58230	Rnf8	3	1	2	0.111111	0.181818	1	0	0	0	0	1	0	0	0	0	0	1	0	0	0	0	0	0	0	0	0
59025	Usp14	3	2	1	0.222222	0.0909091	1	0	0	1	0	0	0	0	0	0	0	1	0	0	0	0	0	0	0	0	0
59029	Psmd14	3	2	1	0.222222	0.0909091	1	0	0	1	0	0	0	0	0	0	0	1	0	0	0	0	0	0	0	0	0
63959	Slc29a1	3	2	1	0.222222	0.0909091	1	0	1	0	0	0	0	0	1	0	0	0	0	0	0	0	0	0	0	0	0
66077	Aurkaip1	3	1	2	0.111111	0.181818	1	0	0	0	0	0	0	0	0	0	0	1	1	0	0	0	0	0	0	0	0
66094	Lsm7	3	2	1	0.222222	0.0909091	1	0	0	1	0	0	0	0	0	0	0	0	1	0	0	0	0	0	0	0	0
66206	1110059E24Rik	3	2	1	0.222222	0.0909091	1	0	0	1	0	0	0	0	0	0	0	1	0	0	0	0	0	0	0	0	0
66358	Adprm	3	2	1	0.222222	0.0909091	1	0	0	1	0	1	0	0	0	0	0	0	0	0	0	0	0	0	0	0	0
66390	Slmo2	3	2	1	0.222222	0.0909091	1	0	0	1	0	0	0	0	0	0	0	1	0	0	0	0	0	0	0	0	0
66483	Rpl36al	3	1	2	0.111111	0.181818	1	0	0	0	0	0	0	0	1	0	0	0	1	0	0	0	0	0	0	0	0
66645	Pspc1	3	2	1	0.222222	0.0909091	1	0	0	1	0	0	0	0	0	0	0	1	0	0	0	0	0	0	0	0	0
66724	Tab3	3	2	1	0.222222	0.0909091	1	0	0	1	0	1	0	0	0	0	0	0	0	0	0	0	0	0	0	0	0
66912	Bzw2	3	1	2	0.111111	0.181818	1	0	0	0	0	0	0	0	0	0	0	1	1	0	0	0	0	0	0	0	0
67014	Mina	3	2	1	0.222222	0.0909091	1	0	0	1	0	1	0	0	0	0	0	0	0	0	0	0	0	0	0	0	0
67204	Eif2s2	3	2	1	0.222222	0.0909091	1	0	0	1	0	0	0	0	0	0	0	1	0	0	0	0	0	0	0	0	0
67308	Mrpl46	3	2	1	0.222222	0.0909091	1	0	0	1	0	0	0	0	0	0	0	1	0	0	0	0	0	0	0	0	0
67459	Nvl	3	2	1	0.222222	0.0909091	1	0	0	1	0	0	0	0	0	0	0	0	1	0	0	0	0	0	0	0	0
67465	Sf3a1	3	1	2	0.111111	0.181818	1	0	0	0	0	0	0	0	1	0	0	0	1	0	0	0	0	0	0	0	0
67531	5730408K05Rik	3	1	2	0.111111	0.181818	1	0	0	0	0	0	0	0	1	0	0	0	1	0	0	0	0	0	0	0	0
67669	l7Rn6	3	2	1	0.222222	0.0909091	1	0	0	1	0	0	0	0	0	0	0	0	1	0	0	0	0	0	0	0	0
67738	Ppid	3	2	1	0.222222	0.0909091	1	0	0	1	0	0	0	0	0	0	0	1	0	0	0	0	0	0	0	0	0
67872	Nsmce4a	3	1	2	0.111111	0.181818	1	0	0	0	0	1	0	0	0	0	0	0	1	0	0	0	0	0	0	0	0
67920	Mak16	3	2	1	0.222222	0.0909091	1	0	0	1	0	0	0	0	0	0	0	1	0	0	0	0	0	0	0	0	0
67966	Zcchc10	3	2	1	0.222222	0.0909091	1	0	0	1	0	0	0	0	0	0	0	1	0	0	0	0	0	0	0	0	0
68145	Etaa1	3	2	1	0.222222	0.0909091	1	0	0	1	0	0	0	0	1	0	0	0	0	0	0	0	0	0	0	0	0
68420	Ankrd13a	3	1	2	0.111111	0.181818	1	0	0	0	0	1	0	0	0	0	0	0	1	0	0	0	0	0	0	0	0
68611	Mrpl28	3	1	2	0.111111	0.181818	1	0	0	0	0	1	0	0	0	0	0	0	1	0	0	0	0	0	0	0	0
68750	Rreb1	3	1	2	0.111111	0.181818	1	0	0	0	0	1	0	0	0	0	0	0	1	0	0	0	0	0	0	0	0
69076	Triap1	3	2	1	0.222222	0.0909091	1	0	0	0	0	0	0	0	0	0	0	0	1	0	0	0	1	0	0	0	0
69091	Vps26b	3	1	2	0.111111	0.181818	1	0	0	0	0	0	0	0	1	0	0	0	1	0	0	0	0	0	0	0	0
69163	Mrpl44	3	1	2	0.111111	0.181818	1	0	0	0	0	1	0	0	0	0	0	0	1	0	0	0	0	0	0	0	0
69178	Snx5	3	2	1	0.222222	0.0909091	1	0	0	1	0	0	0	0	0	0	0	1	0	0	0	0	0	0	0	0	0
69354	Slc38a4	3	2	1	0.222222	0.0909091	1	0	0	1	0	0	0	0	0	0	0	0	1	0	0	0	0	0	0	0	0
69534	Avpi1	3	1	2	0.111111	0.181818	1	0	0	0	1	1	0	0	0	0	0	0	0	0	0	0	0	0	0	0	0
69581	Rhou	3	1	2	0.111111	0.181818	1	0	0	0	0	0	0	0	0	0	0	0	1	1	0	0	0	0	0	0	0
69747	Zswim7	3	2	1	0.222222	0.0909091	1	0	1	0	0	0	0	0	0	1	0	0	0	0	0	0	0	0	0	0	0
69920	Polr2i	3	1	2	0.111111	0.181818	1	0	0	0	0	0	0	0	0	0	1	0	1	0	0	0	0	0	0	0	0
70024	Mcm10	3	2	1	0.222222	0.0909091	1	0	1	0	0	0	0	0	0	0	0	0	1	0	0	0	0	0	0	0	0
70078	Nol7	3	1	2	0.111111	0.181818	1	0	0	0	0	0	0	0	1	0	0	1	0	0	0	0	0	0	0	0	0
70152	Mettl7a1	3	2	1	0.222222	0.0909091	1	0	0	1	0	1	0	0	0	0	0	0	0	0	0	0	0	0	0	0	0
71701	Pnpt1	3	2	1	0.222222	0.0909091	1	0	0	1	0	0	0	0	0	0	0	1	0	0	0	0	0	0	0	0	0
71735	Lrwd1	3	1	2	0.111111	0.181818	1	0	0	0	0	0	0	0	1	0	0	0	1	0	0	0	0	0	0	0	0
71810	Ranbp3	3	2	1	0.222222	0.0909091	1	0	0	1	0	1	0	0	0	0	0	0	0	0	0	0	0	0	0	0	0
71846	Syce2	3	2	1	0.222222	0.0909091	1	0	0	1	0	0	0	0	1	0	0	0	0	0	0	0	0	0	0	0	0
71978	Ppp2r2a	3	2	1	0.222222	0.0909091	1	0	0	1	0	0	0	0	0	0	1	0	0	0	0	0	0	0	0	0	0
72085	Osgepl1	3	1	2	0.111111	0.181818	1	0	0	0	0	0	0	0	0	0	0	1	1	0	0	0	0	0	0	0	0
72124	Seh1l	3	2	1	0.222222	0.0909091	1	0	0	1	0	0	0	0	0	0	0	1	0	0	0	0	0	0	0	0	0
72612	2700029M09Rik	3	1	2	0.111111	0.181818	1	0	0	0	0	0	0	0	0	0	0	1	1	0	0	0	0	0	0	0	0
73658	Spns1	3	2	1	0.222222	0.0909091	1	0	1	0	0	0	0	0	0	1	0	0	0	0	0	0	0	0	0	0	0
73666	Thoc3	3	1	2	0.111111	0.181818	1	0	0	0	0	0	0	0	1	0	0	0	1	0	0	0	0	0	0	0	0
74108	Parn	3	1	2	0.111111	0.181818	1	0	0	0	0	1	0	0	1	0	0	0	0	0	0	0	0	0	0	0	0
74196	Ttc27	3	2	1	0.222222	0.0909091	1	0	0	1	0	0	0	0	0	0	0	1	0	0	0	0	0	0	0	0	0
75221	Dpp3	3	1	2	0.111111	0.181818	1	0	0	0	0	0	0	0	0	0	0	1	1	0	0	0	0	0	0	0	0
76936	Hnrnpm	3	1	2	0.111111	0.181818	1	0	0	0	0	0	0	0	0	0	0	1	1	0	0	0	0	0	0	0	0
77044	Arid2	3	1	2	0.111111	0.181818	1	0	0	0	0	0	0	0	1	0	0	0	1	0	0	0	0	0	0	0	0
77117	Zfp934	3	2	1	0.222222	0.0909091	1	0	0	1	0	0	0	0	0	0	0	0	1	0	0	0	0	0	0	0	0
77721	Mrps5	3	2	1	0.222222	0.0909091	1	0	0	1	0	0	0	0	0	0	0	1	0	0	0	0	0	0	0	0	0
80743	Vps16	3	2	1	0.222222	0.0909091	1	0	0	0	0	0	0	0	0	0	0	1	0	0	0	0	0	0	1	0	0
80750	N4bp1	3	2	1	0.222222	0.0909091	1	0	0	1	0	1	0	0	0	0	0	0	0	0	0	0	0	0	0	0	0
80886	Senp3	3	2	1	0.222222	0.0909091	1	0	0	1	0	1	0	0	0	0	0	0	0	0	0	0	0	0	0	0	0
104156	Etv5	3	2	1	0.222222	0.0909091	0	1	0	0	0	0	0	0	0	0	1	0	0	0	0	0	0	0	0	0	1
20514	Slc1a5	3	1	2	0.111111	0.181818	0	1	0	0	0	0	0	0	1	0	0	0	1	0	0	0	0	0	0	0	0
20849	Stat4	3	1	2	0.111111	0.181818	0	1	0	0	0	1	0	0	0	0	0	0	0	1	0	0	0	0	0	0	0
14348	Fut9	3	2	1	0.222222	0.0909091	0	1	0	1	0	0	0	0	0	1	0	0	0	0	0	0	0	0	0	0	0
74377	Hsf2bp	3	2	1	0.222222	0.0909091	0	1	1	0	1	0	0	0	0	0	0	0	0	0	0	0	0	0	0	0	0
17532	Mras	3	2	1	0.222222	0.0909091	0	1	1	0	0	0	0	0	0	1	0	0	0	0	0	0	0	0	0	0	0
76477	Pcolce2	3	2	1	0.222222	0.0909091	0	1	1	0	0	0	0	0	0	1	0	0	0	0	0	0	0	0	0	0	0
15221	Foxd3	3	2	1	0.222222	0.0909091	0	1	0	0	0	0	0	0	0	0	1	0	0	0	0	0	0	0	0	0	1
54427	Dnmt3l	3	3	0	0.333333	0	0	1	1	0	0	0	0	0	0	0	0	0	0	0	0	0	0	0	0	0	1
68738	Acss1	3	1	1	0.111111	0.0909091	0	1	0	0	0	0	1	0	0	0	0	0	0	0	1	0	0	0	0	0	0
75568	Capsl	3	2	1	0.222222	0.0909091	0	1	1	0	1	0	0	0	0	0	0	0	0	0	0	0	0	0	0	0	0
73677	Psma8	3	2	1	0.222222	0.0909091	0	1	1	0	1	0	0	0	0	0	0	0	0	0	0	0	0	0	0	0	0
67609	4930453N24Rik	3	2	1	0.222222	0.0909091	0	1	0	1	0	0	0	0	0	0	0	0	1	0	0	0	0	0	0	0	0
106347	Ildr1	3	2	1	0.222222	0.0909091	0	1	1	0	1	0	0	0	0	0	0	0	0	0	0	0	0	0	0	0	0
76568	Ift46	3	1	2	0.111111	0.181818	0	0	0	0	0	1	0	0	1	0	0	0	0	0	0	0	1	0	0	0	0
67039	Rbm25	3	1	2	0.111111	0.181818	0	0	0	0	0	1	0	0	1	0	0	0	0	0	0	0	1	0	0	0	0
27494	Amot	3	1	1	0.111111	0.0909091	0	0	0	0	0	0	0	1	0	0	0	0	0	0	1	0	1	0	0	0	0
51786	Cpsf2	3	1	2	0.111111	0.181818	0	0	0	0	1	0	0	0	0	0	0	1	0	0	0	0	1	0	0	0	0
26905	Eif2s3x	3	2	1	0.222222	0.0909091	0	0	0	1	0	0	0	0	0	0	0	1	0	0	0	0	1	0	0	0	0
13681	Eif4a1	3	2	1	0.222222	0.0909091	0	0	0	0	0	0	0	0	0	0	0	0	1	0	0	0	1	0	1	0	0
16195	Il6st	3	2	1	0.222222	0.0909091	0	0	0	0	0	0	0	0	0	0	1	0	0	0	0	0	1	0	0	0	1
66262	Ing5	3	2	1	0.222222	0.0909091	0	0	1	0	1	0	0	0	0	0	0	0	0	0	0	0	1	0	0	0	0
28077	Med10	3	1	2	0.111111	0.181818	0	0	0	0	0	0	0	0	1	0	0	0	1	0	0	0	1	0	0	0	0
66979	Pole4	3	1	2	0.111111	0.181818	0	0	0	0	0	1	0	0	0	0	0	1	0	0	0	0	1	0	0	0	0
22318	Vamp2	3	1	2	0.111111	0.181818	0	0	0	0	1	1	0	0	0	0	0	0	0	0	0	0	1	0	0	0	0
22632	Yy1	3	2	1	0.222222	0.0909091	0	0	0	0	0	0	0	0	0	0	1	0	0	0	0	0	1	0	0	0	1
11739	Slc25a4	3	1	2	0.111111	0.181818	0	0	1	0	0	0	1	0	0	1	0	0	0	0	0	0	0	0	0	0	0
56327	Arl2	3	1	2	0.111111	0.181818	0	0	1	0	1	1	0	0	0	0	0	0	0	0	0	0	0	0	0	0	0
228033	Atp5g3	3	1	2	0.111111	0.181818	0	0	1	0	1	0	0	0	0	1	0	0	0	0	0	0	0	0	0	0	0
12035	Bcat1	3	2	1	0.222222	0.0909091	0	0	1	1	0	0	0	0	0	1	0	0	0	0	0	0	0	0	0	0	0
12408	Cbr1	3	1	2	0.111111	0.181818	0	0	1	0	0	1	0	0	0	1	0	0	0	0	0	0	0	0	0	0	0
109857	Cbr3	3	1	2	0.111111	0.181818	0	0	1	0	0	0	0	0	0	1	0	0	0	1	0	0	0	0	0	0	0
107581	Col16a1	3	1	2	0.111111	0.181818	0	0	1	0	0	0	0	0	0	1	1	0	0	0	0	0	0	0	0	0	0
12876	Cpe	3	1	1	0.111111	0.0909091	0	0	1	0	0	0	0	0	0	1	0	0	0	0	1	0	0	0	0	0	0
12903	Crabp1	3	2	1	0.222222	0.0909091	0	0	1	1	0	0	0	0	0	0	0	0	1	0	0	0	0	0	0	0	0
12904	Crabp2	3	2	1	0.222222	0.0909091	0	0	1	1	0	0	0	0	0	0	0	0	1	0	0	0	0	0	0	0	0
51797	Ctps	3	2	1	0.222222	0.0909091	0	0	1	1	0	0	0	0	0	0	0	1	0	0	0	0	0	0	0	0	0
66445	Cyc1	3	1	2	0.111111	0.181818	0	0	1	0	0	0	0	0	0	1	0	1	0	0	0	0	0	0	0	0	0
13082	Cyp26a1	3	2	1	0.222222	0.0909091	0	0	1	1	0	0	0	0	0	0	0	0	1	0	0	0	0	0	0	0	0
13200	Ddost	3	1	2	0.111111	0.181818	0	0	1	0	0	0	0	0	0	1	0	0	1	0	0	0	0	0	0	0	0
14745	Lpar1	3	1	2	0.111111	0.181818	0	0	1	0	0	0	0	0	0	0	1	0	1	0	0	0	0	0	0	0	0
54616	Extl3	3	1	2	0.111111	0.181818	0	0	1	0	0	0	0	0	0	1	1	0	0	0	0	0	0	0	0	0	0
110611	Hdlbp	3	1	2	0.111111	0.181818	0	0	1	0	0	0	0	0	0	1	1	0	0	0	0	0	0	0	0	0	0
15001	H2-Oa	3	1	2	0.111111	0.181818	0	0	1	0	0	0	0	0	0	1	0	0	1	0	0	0	0	0	0	0	0
15574	Hus1	3	2	1	0.222222	0.0909091	0	0	1	1	0	0	0	0	0	0	0	1	0	0	0	0	0	0	0	0	0
16430	Stt3a	3	1	2	0.111111	0.181818	0	0	1	0	0	0	0	0	0	1	0	1	0	0	0	0	0	0	0	0	0
16948	Lox	3	2	1	0.222222	0.0909091	0	0	1	1	0	1	0	0	0	0	0	0	0	0	0	0	0	0	0	0	0
17350	Mlh1	3	1	2	0.111111	0.181818	0	0	1	0	0	0	0	0	0	0	0	1	1	0	0	0	0	0	0	0	0
68729	Trim37	3	1	2	0.111111	0.181818	0	0	1	0	0	0	1	0	0	1	0	0	0	0	0	0	0	0	0	0	0
192156	Mvd	3	1	2	0.111111	0.181818	0	0	1	0	1	0	0	0	0	1	0	0	0	0	0	0	0	0	0	0	0
66108	Ndufa9	3	1	2	0.111111	0.181818	0	0	1	0	0	0	0	0	0	1	0	1	0	0	0	0	0	0	0	0	0
67264	Ndufb8	3	1	2	0.111111	0.181818	0	0	1	0	0	1	0	0	0	1	0	0	0	0	0	0	0	0	0	0	0
100163	Pafah2	3	2	1	0.222222	0.0909091	0	0	1	0	1	0	0	0	0	0	0	0	0	0	0	0	0	0	1	0	0
20713	Serpini1	3	1	2	0.111111	0.181818	0	0	1	0	0	1	0	0	0	1	0	0	0	0	0	0	0	0	0	0	0
23988	Pin1	3	1	2	0.111111	0.181818	0	0	1	0	0	1	0	0	0	0	0	1	0	0	0	0	0	0	0	0	0
19060	Ppp5c	3	1	2	0.111111	0.181818	0	0	1	0	0	0	0	0	0	1	0	1	0	0	0	0	0	0	0	0	0
19712	Rest	3	2	1	0.222222	0.0909091	0	0	1	0	0	0	0	0	0	0	0	0	0	1	0	0	0	0	0	0	1
68275	Rpa1	3	1	2	0.111111	0.181818	0	0	1	0	0	0	0	0	1	0	0	1	0	0	0	0	0	0	0	0	0
434434	Gm5621	3	1	2	0.111111	0.181818	0	0	1	0	1	0	0	0	0	1	0	0	0	0	0	0	0	0	0	0	0
66234	Msmo1	3	1	2	0.111111	0.181818	0	0	1	0	0	0	0	0	0	1	0	1	0	0	0	0	0	0	0	0	0
66226	Trappc2	3	1	2	0.111111	0.181818	0	0	1	0	0	0	0	0	0	1	1	0	0	0	0	0	0	0	0	0	0
20598	Smpd2	3	1	2	0.111111	0.181818	0	0	1	0	0	1	0	0	0	1	0	0	0	0	0	0	0	0	0	0	0
67673	Tceb2	3	1	2	0.111111	0.181818	0	0	1	0	0	0	0	0	1	1	0	0	0	0	0	0	0	0	0	0	0
76497	Ppp1r11	3	1	2	0.111111	0.181818	0	0	1	0	1	0	0	0	0	1	0	0	0	0	0	0	0	0	0	0	0
21420	Tfap2c	3	3	0	0.333333	0	0	0	1	1	0	0	0	0	0	0	0	0	0	0	0	0	0	0	0	0	1
21857	Timp1	3	2	1	0.222222	0.0909091	0	0	1	1	0	0	0	0	0	0	0	1	0	0	0	0	0	0	0	0	0
21888	Tle4	3	2	1	0.222222	0.0909091	0	0	1	0	1	0	0	0	0	0	0	0	0	0	0	0	0	0	0	0	1
56191	Tro	3	1	2	0.111111	0.181818	0	0	1	0	0	1	0	0	0	1	0	0	0	0	0	0	0	0	0	0	0
22375	Wars	3	1	2	0.111111	0.181818	0	0	1	0	0	1	0	0	0	1	0	0	0	0	0	0	0	0	0	0	0
22696	Zfp37	3	1	2	0.111111	0.181818	0	0	1	0	0	0	0	0	0	1	0	1	0	0	0	0	0	0	0	0	0
22666	Zbtb14	3	1	2	0.111111	0.181818	0	0	1	0	0	1	0	0	0	0	0	0	1	0	0	0	0	0	0	0	0
26565	Pla2g10	3	3	0	0.333333	0	0	0	1	1	0	0	0	0	0	0	0	0	0	0	0	0	0	0	1	0	0
67533	Ppfibp1	3	1	2	0.111111	0.181818	0	0	1	0	1	0	0	0	0	1	0	0	0	0	0	0	0	0	0	0	0
18114	Rrp1	3	1	2	0.111111	0.181818	0	0	1	0	1	0	0	0	0	1	0	0	0	0	0	0	0	0	0	0	0
50784	Ppap2c	3	1	2	0.111111	0.181818	0	0	1	0	1	0	0	0	0	1	0	0	0	0	0	0	0	0	0	0	0
216233	Socs2	3	1	2	0.111111	0.181818	0	0	1	0	0	0	0	0	0	1	0	0	0	1	0	0	0	0	0	0	0
12848	Cops2	3	2	1	0.222222	0.0909091	0	0	1	1	0	0	0	0	0	0	0	1	0	0	0	0	0	0	0	0	0
13663	Ei24	3	1	2	0.111111	0.181818	0	0	1	0	0	0	0	0	0	1	0	1	0	0	0	0	0	0	0	0	0
83397	Akap12	3	2	1	0.222222	0.0909091	0	0	1	1	0	0	0	0	0	0	0	1	0	0	0	0	0	0	0	0	0
22758	Zscan12	3	1	2	0.111111	0.181818	0	0	1	0	0	1	0	0	0	0	0	1	0	0	0	0	0	0	0	0	0
15185	Hdac6	3	1	2	0.111111	0.181818	0	0	1	0	0	0	0	0	0	1	0	0	1	0	0	0	0	0	0	0	0
27407	Abcf2	3	1	2	0.111111	0.181818	0	0	1	0	1	0	0	0	0	0	0	1	0	0	0	0	0	0	0	0	0
54633	Pqbp1	3	1	2	0.111111	0.181818	0	0	1	0	0	0	0	0	1	1	0	0	0	0	0	0	0	0	0	0	0
71974	Prmt3	3	1	2	0.111111	0.181818	0	0	1	0	0	0	0	0	0	0	0	1	1	0	0	0	0	0	0	0	0
12850	Coq7	3	1	2	0.111111	0.181818	0	0	1	0	0	0	0	0	0	1	0	1	0	0	0	0	0	0	0	0	0
18150	Npm3	3	2	1	0.222222	0.0909091	0	0	1	1	0	0	0	0	0	0	0	1	0	0	0	0	0	0	0	0	0
56031	Ppie	3	1	2	0.111111	0.181818	0	0	1	0	0	0	0	0	1	0	0	1	0	0	0	0	0	0	0	0	0
66180	Leprel4	3	1	2	0.111111	0.181818	0	0	1	0	0	0	0	0	0	0	1	0	0	1	0	0	0	0	0	0	0
68441	Rraga	3	1	2	0.111111	0.181818	0	0	1	0	0	0	0	0	0	1	0	1	0	0	0	0	0	0	0	0	0
67903	Gipc1	3	1	2	0.111111	0.181818	0	0	1	0	0	0	0	0	0	1	0	1	0	0	0	0	0	0	0	0	0
75605	Kdm5b	3	1	2	0.111111	0.181818	0	0	1	0	0	0	0	0	0	1	1	0	0	0	0	0	0	0	0	0	0
13855	Epn2	3	1	2	0.111111	0.181818	0	0	1	0	0	0	0	0	0	1	0	1	0	0	0	0	0	0	0	0	0
72462	Rrp1b	3	1	2	0.111111	0.181818	0	0	1	0	1	0	1	0	0	0	0	0	0	0	0	0	0	0	0	0	0
100737	Dcun1d4	3	1	2	0.111111	0.181818	0	0	1	0	1	0	0	0	0	1	0	0	0	0	0	0	0	0	0	0	0
74148	Cluh	3	1	2	0.111111	0.181818	0	0	1	0	1	1	0	0	0	0	0	0	0	0	0	0	0	0	0	0	0
56305	Pitpnb	3	2	1	0.222222	0.0909091	0	0	1	1	0	0	0	0	0	0	0	1	0	0	0	0	0	0	0	0	0
72722	Fam98a	3	2	1	0.222222	0.0909091	0	0	1	1	0	0	0	0	0	0	0	1	0	0	0	0	0	0	0	0	0
78560	Gpr124	3	1	2	0.111111	0.181818	0	0	1	0	1	0	0	0	0	0	1	0	0	0	0	0	0	0	0	0	0
67922	Fam32a	3	1	2	0.111111	0.181818	0	0	1	0	0	0	0	0	0	0	0	1	1	0	0	0	0	0	0	0	0
66409	Rsl1d1	3	1	2	0.111111	0.181818	0	0	1	0	1	0	0	0	0	1	0	0	0	0	0	0	0	0	0	0	0
74257	Tspan17	3	1	2	0.111111	0.181818	0	0	1	0	0	0	0	0	0	1	1	0	0	0	0	0	0	0	0	0	0
67207	Lsm1	3	1	2	0.111111	0.181818	0	0	1	0	0	1	0	0	0	1	0	0	0	0	0	0	0	0	0	0	0
66254	Dimt1	3	1	2	0.111111	0.181818	0	0	1	0	1	0	0	0	0	1	0	0	0	0	0	0	0	0	0	0	0
67071	Rps6ka6	3	2	1	0.222222	0.0909091	0	0	1	0	0	0	0	0	0	1	0	0	0	0	0	0	0	1	0	0	0
216551	Lgalsl	3	1	2	0.111111	0.181818	0	0	1	0	0	0	0	0	0	1	0	0	0	1	0	0	0	0	0	0	0
14894	Cfap20	3	1	2	0.111111	0.181818	0	0	1	0	0	0	0	0	0	1	1	0	0	0	0	0	0	0	0	0	0
56322	Timm22	3	1	2	0.111111	0.181818	0	0	1	0	0	0	0	0	0	1	0	1	0	0	0	0	0	0	0	0	0
20262	Stmn3	3	1	2	0.111111	0.181818	0	0	1	0	0	0	0	0	0	1	0	0	0	1	0	0	0	0	0	0	0
57875	Angptl4	3	2	1	0.222222	0.0909091	0	0	1	1	0	0	0	0	0	0	0	1	0	0	0	0	0	0	0	0	0
19193	Pipox	3	1	2	0.111111	0.181818	0	0	1	0	0	0	0	0	1	1	0	0	0	0	0	0	0	0	0	0	0
15490	Hsd17b7	3	1	2	0.111111	0.181818	0	0	1	0	0	0	0	0	0	1	0	0	1	0	0	0	0	0	0	0	0
19335	Rab23	3	2	1	0.222222	0.0909091	0	0	1	1	0	0	0	0	0	0	0	1	0	0	0	0	0	0	0	0	0
12212	Chic1	3	2	1	0.222222	0.0909091	0	0	1	1	1	0	0	0	0	0	0	0	0	0	0	0	0	0	0	0	0
67390	Rnmtl1	3	1	2	0.111111	0.181818	0	0	1	0	0	1	0	0	0	0	0	0	1	0	0	0	0	0	0	0	0
67249	Tbc1d19	3	1	2	0.111111	0.181818	0	0	1	0	0	0	1	0	0	1	0	0	0	0	0	0	0	0	0	0	0
114128	Laptm4b	3	1	2	0.111111	0.181818	0	0	1	0	1	0	0	0	0	1	0	0	0	0	0	0	0	0	0	0	0
52530	Nhp2	3	1	2	0.111111	0.181818	0	0	1	0	0	0	1	0	0	1	0	0	0	0	0	0	0	0	0	0	0
235323	Usp28	3	1	2	0.111111	0.181818	0	0	1	0	1	0	0	0	0	1	0	0	0	0	0	0	0	0	0	0	0
14230	Fkbp10	3	1	2	0.111111	0.181818	0	0	1	0	0	1	0	0	1	0	0	0	0	0	0	0	0	0	0	0	0
105501	Abhd4	3	1	2	0.111111	0.181818	0	0	1	0	0	0	0	0	0	1	1	0	0	0	0	0	0	0	0	0	0
18744	Pja1	3	1	2	0.111111	0.181818	0	0	1	0	0	0	0	0	0	1	1	0	0	0	0	0	0	0	0	0	0
66771	Gid4	3	1	2	0.111111	0.181818	0	0	1	0	0	0	0	0	0	1	1	0	0	0	0	0	0	0	0	0	0
67260	Cers4	3	1	2	0.111111	0.181818	0	0	1	0	1	0	0	0	0	0	0	0	0	1	0	0	0	0	0	0	0
71919	Rpap3	3	2	1	0.222222	0.0909091	0	0	1	1	0	0	0	0	0	0	0	1	0	0	0	0	0	0	0	0	0
229504	Isg20l2	3	2	1	0.222222	0.0909091	0	0	1	0	0	0	1	0	0	0	0	0	0	0	0	0	0	0	1	0	0
66271	Tmem126a	3	1	2	0.111111	0.181818	0	0	1	0	0	1	0	0	0	1	0	0	0	0	0	0	0	0	0	0	0
69823	Fyttd1	3	1	2	0.111111	0.181818	0	0	1	0	1	0	0	0	0	1	0	0	0	0	0	0	0	0	0	0	0
109145	Gins4	3	1	2	0.111111	0.181818	0	0	1	0	1	0	1	0	0	0	0	0	0	0	0	0	0	0	0	0	0
227723	Prrc2b	3	1	2	0.111111	0.181818	0	0	1	0	0	0	1	0	0	1	0	0	0	0	0	0	0	0	0	0	0
319675	5830418K08Rik	3	1	2	0.111111	0.181818	0	0	1	0	1	0	0	0	0	1	0	0	0	0	0	0	0	0	0	0	0
69556	Bod1	3	1	2	0.111111	0.181818	0	0	1	0	1	0	0	0	0	1	0	0	0	0	0	0	0	0	0	0	0
68401	G6pc3	3	1	2	0.111111	0.181818	0	0	1	0	1	0	0	0	0	1	0	0	0	0	0	0	0	0	0	0	0
67371	Gtf3c6	3	1	2	0.111111	0.181818	0	0	1	0	1	0	0	0	0	1	0	0	0	0	0	0	0	0	0	0	0
319710	Frmd6	3	1	2	0.111111	0.181818	0	0	1	0	0	0	0	0	0	0	1	0	0	1	0	0	0	0	0	0	0
68099	Fam92a	3	1	2	0.111111	0.181818	0	0	1	0	0	0	1	0	0	1	0	0	0	0	0	0	0	0	0	0	0
76900	Ssbp4	3	1	2	0.111111	0.181818	0	0	1	0	1	1	0	0	0	0	0	0	0	0	0	0	0	0	0	0	0
66279	Tmem218	3	1	2	0.111111	0.181818	0	0	1	0	1	0	0	0	0	1	0	0	0	0	0	0	0	0	0	0	0
22719	Zfp61	3	1	2	0.111111	0.181818	0	0	1	0	0	0	0	0	0	1	0	1	0	0	0	0	0	0	0	0	0
11364	Acadm	3	1	2	0.111111	0.181818	0	0	0	1	0	1	0	0	0	0	0	1	0	0	0	0	0	0	0	0	0
11370	Acadvl	3	1	2	0.111111	0.181818	0	0	0	1	1	0	0	0	0	0	1	0	0	0	0	0	0	0	0	0	0
11431	Acp1	3	1	2	0.111111	0.181818	0	0	0	1	0	0	0	0	0	0	0	1	1	0	0	0	0	0	0	0	0
11464	Actc1	3	1	2	0.111111	0.181818	0	0	0	1	0	0	0	0	1	1	0	0	0	0	0	0	0	0	0	0	0
11957	Atp5j	3	1	2	0.111111	0.181818	0	0	0	1	0	0	0	0	0	1	0	1	0	0	0	0	0	0	0	0	0
12142	Prdm1	3	1	2	0.111111	0.181818	0	0	0	1	1	0	0	0	0	0	0	0	1	0	0	0	0	0	0	0	0
12585	Cdr2	3	1	2	0.111111	0.181818	0	0	0	1	0	0	0	0	0	0	0	1	1	0	0	0	0	0	0	0	0
12632	Cfl2	3	1	2	0.111111	0.181818	0	0	0	1	0	0	0	0	0	0	0	1	1	0	0	0	0	0	0	0	0
12675	Chuk	3	1	2	0.111111	0.181818	0	0	0	1	0	0	0	0	1	0	0	1	0	0	0	0	0	0	0	0	0
12831	Col5a1	3	1	2	0.111111	0.181818	0	0	0	1	0	0	0	0	0	0	1	0	1	0	0	0	0	0	0	0	0
12843	Col1a2	3	1	1	0.111111	0.0909091	0	0	0	1	0	0	0	0	0	0	0	0	1	0	1	0	0	0	0	0	0
13017	Ctbp2	3	2	1	0.222222	0.0909091	0	0	0	1	0	0	0	0	1	0	0	0	0	0	0	0	0	0	0	0	1
13132	Dab2	3	1	2	0.111111	0.181818	0	0	0	1	0	0	0	0	0	0	0	0	1	1	0	0	0	0	0	0	0
13382	Dld	3	1	2	0.111111	0.181818	0	0	0	1	0	0	0	0	0	0	0	1	1	0	0	0	0	0	0	0	0
13806	Eno1	3	1	2	0.111111	0.181818	0	0	0	1	0	0	0	0	1	0	0	1	0	0	0	0	0	0	0	0	0
13860	Eps8	3	1	2	0.111111	0.181818	0	0	0	1	0	0	0	0	0	0	0	1	0	1	0	0	0	0	0	0	0
14118	Fbn1	3	1	2	0.111111	0.181818	0	0	0	1	0	0	0	0	1	0	0	1	0	0	0	0	0	0	0	0	0
14325	Ftl1	3	1	2	0.111111	0.181818	0	0	0	1	0	0	0	0	1	0	0	0	1	0	0	0	0	0	0	0	0
14600	Ghr	3	1	2	0.111111	0.181818	0	0	0	1	0	1	0	0	0	0	0	1	0	0	0	0	0	0	0	0	0
15247	Hiat1	3	1	2	0.111111	0.181818	0	0	0	1	0	0	0	0	0	0	0	1	1	0	0	0	0	0	0	0	0
15502	Dnaja1	3	1	2	0.111111	0.181818	0	0	0	1	0	0	0	0	0	0	0	1	1	0	0	0	0	0	0	0	0
16004	Igf2r	3	1	2	0.111111	0.181818	0	0	0	1	0	0	0	0	1	0	0	0	0	1	0	0	0	0	0	0	0
16499	Kcnab3	3	1	2	0.111111	0.181818	0	0	0	1	0	1	0	0	0	0	0	1	0	0	0	0	0	0	0	0	0
16816	Lcat	3	1	2	0.111111	0.181818	0	0	0	1	1	0	0	0	0	1	0	0	0	0	0	0	0	0	0	0	0
17222	Anapc1	3	1	2	0.111111	0.181818	0	0	0	1	0	0	0	0	1	0	0	0	1	0	0	0	0	0	0	0	0
17420	Mnat1	3	1	2	0.111111	0.181818	0	0	0	1	0	0	0	0	0	0	0	1	1	0	0	0	0	0	0	0	0
17427	Mns1	3	1	2	0.111111	0.181818	0	0	0	1	0	0	0	0	0	0	0	1	1	0	0	0	0	0	0	0	0
18024	Nfe2l2	3	1	2	0.111111	0.181818	0	0	0	1	0	0	0	0	1	0	0	1	0	0	0	0	0	0	0	0	0
18616	Peg3	3	1	2	0.111111	0.181818	0	0	0	1	0	1	0	0	0	0	0	0	0	1	0	0	0	0	0	0	0
18634	Pex7	3	1	2	0.111111	0.181818	0	0	0	1	0	1	0	0	0	0	0	1	0	0	0	0	0	0	0	0	0
18700	Piga	3	1	2	0.111111	0.181818	0	0	0	1	0	0	0	0	0	0	0	1	1	0	0	0	0	0	0	0	0
18783	Pla2g4a	3	1	2	0.111111	0.181818	0	0	0	1	0	1	1	0	0	0	0	0	0	0	0	0	0	0	0	0	0
18843	Bpifa1	3	1	2	0.111111	0.181818	0	0	0	1	0	1	0	0	0	0	0	1	0	0	0	0	0	0	0	0	0
19043	Ppm1b	3	1	2	0.111111	0.181818	0	0	0	1	0	0	0	0	0	0	1	1	0	0	0	0	0	0	0	0	0
19053	Ppp2cb	3	1	2	0.111111	0.181818	0	0	0	1	0	0	0	0	0	0	0	1	1	0	0	0	0	0	0	0	0
19159	Cyth3	3	2	1	0.222222	0.0909091	0	0	0	1	0	1	0	0	0	0	0	0	0	0	0	0	0	0	1	0	0
19177	Psmb7	3	1	2	0.111111	0.181818	0	0	0	1	0	0	0	0	0	0	0	1	1	0	0	0	0	0	0	0	0
19272	Ptprk	3	1	2	0.111111	0.181818	0	0	0	1	0	1	0	0	0	0	0	0	0	1	0	0	0	0	0	0	0
19330	Rab18	3	1	2	0.111111	0.181818	0	0	0	1	0	1	0	0	0	0	0	1	0	0	0	0	0	0	0	0	0
19370	Raet1c	3	1	2	0.111111	0.181818	0	0	0	1	0	0	0	0	1	0	0	1	0	0	0	0	0	0	0	0	0
19877	Rock1	3	1	2	0.111111	0.181818	0	0	0	1	0	0	0	0	1	0	0	1	0	0	0	0	0	0	0	0	0
19878	Rock2	3	1	2	0.111111	0.181818	0	0	0	1	0	1	0	0	0	0	0	1	0	0	0	0	0	0	0	0	0
20333	Sec22b	3	1	2	0.111111	0.181818	0	0	0	1	0	0	0	0	0	0	0	1	1	0	0	0	0	0	0	0	0
20335	Sec61g	3	1	2	0.111111	0.181818	0	0	0	1	0	1	0	0	0	0	0	0	1	0	0	0	0	0	0	0	0
20349	Sema3e	3	1	2	0.111111	0.181818	0	0	0	1	0	0	0	0	0	0	1	0	0	1	0	0	0	0	0	0	0
20729	Spin1	3	1	2	0.111111	0.181818	0	0	0	1	0	0	1	0	0	0	0	0	1	0	0	0	0	0	0	0	0
20844	Stam	3	1	2	0.111111	0.181818	0	0	0	1	0	1	0	0	0	0	0	1	0	0	0	0	0	0	0	0	0
20901	Strap	3	1	2	0.111111	0.181818	0	0	0	1	0	0	0	0	0	0	0	1	1	0	0	0	0	0	0	0	0
20912	Stxbp3a	3	1	2	0.111111	0.181818	0	0	0	1	0	1	0	0	0	0	0	1	0	0	0	0	0	0	0	0	0
20969	Sdc1	3	1	2	0.111111	0.181818	0	0	0	1	1	0	0	0	0	0	0	0	0	1	0	0	0	0	0	0	0
21399	Tcea1	3	1	2	0.111111	0.181818	0	0	0	1	0	0	0	0	0	0	0	1	1	0	0	0	0	0	0	0	0
21761	Morf4l1	3	1	2	0.111111	0.181818	0	0	0	1	0	0	0	0	0	0	0	1	1	0	0	0	0	0	0	0	0
21788	Tfpi	3	1	2	0.111111	0.181818	0	0	0	1	0	1	1	0	0	0	0	0	0	0	0	0	0	0	0	0	0
21833	Thra	3	1	2	0.111111	0.181818	0	0	0	1	0	1	0	1	0	0	0	0	0	0	0	0	0	0	0	0	0
21887	Tle3	3	1	2	0.111111	0.181818	0	0	0	1	0	0	1	0	1	0	0	0	0	0	0	0	0	0	0	0	0
21982	Tmem165	3	1	2	0.111111	0.181818	0	0	0	1	0	0	0	0	0	0	0	1	1	0	0	0	0	0	0	0	0
22158	Tulp3	3	1	2	0.111111	0.181818	0	0	0	1	0	0	0	0	1	0	1	0	0	0	0	0	0	0	0	0	0
22194	Ube2e1	3	1	2	0.111111	0.181818	0	0	0	1	0	0	0	0	0	1	0	1	0	0	0	0	0	0	0	0	0
22218	Sumo1	3	2	1	0.222222	0.0909091	0	0	0	1	0	0	0	0	0	0	0	1	0	0	0	0	0	0	0	0	1
22629	Ywhah	3	1	2	0.111111	0.181818	0	0	0	1	0	1	0	0	0	0	0	1	0	0	0	0	0	0	0	0	0
22634	Plagl1	3	1	2	0.111111	0.181818	0	0	0	1	0	0	0	0	1	0	0	0	1	0	0	0	0	0	0	0	0
22646	Zfp105	3	1	2	0.111111	0.181818	0	0	0	1	0	0	0	0	0	0	0	1	1	0	0	0	0	0	0	0	0
22687	Zpr1	3	1	2	0.111111	0.181818	0	0	0	1	0	1	0	0	0	0	0	1	0	0	0	0	0	0	0	0	0
22772	Zic2	3	2	1	0.222222	0.0909091	0	0	0	1	0	0	0	0	0	0	0	0	1	0	0	0	0	0	0	0	1
26357	Abcg2	3	1	2	0.111111	0.181818	0	0	0	1	0	1	0	0	0	0	0	0	0	1	0	0	0	0	0	0	0
26413	Mapk1	3	2	1	0.222222	0.0909091	0	0	0	1	0	0	0	0	0	0	0	1	0	0	0	0	0	0	0	0	1
26754	Cops5	3	1	2	0.111111	0.181818	0	0	0	1	0	0	0	0	0	0	0	1	1	0	0	0	0	0	0	0	0
26894	Cops7a	3	1	2	0.111111	0.181818	0	0	0	1	0	1	0	0	0	0	0	1	0	0	0	0	0	0	0	0	0
26926	Aifm1	3	1	2	0.111111	0.181818	0	0	0	1	0	0	0	0	0	0	0	1	1	0	0	0	0	0	0	0	0
27058	Srp9	3	1	2	0.111111	0.181818	0	0	0	1	0	0	0	0	0	0	0	1	1	0	0	0	0	0	0	0	0
27370	Rps26	3	1	2	0.111111	0.181818	0	0	0	1	0	0	0	0	1	0	0	0	1	0	0	0	0	0	0	0	0
30057	Timm8b	3	1	2	0.111111	0.181818	0	0	0	1	0	0	0	0	0	0	0	1	1	0	0	0	0	0	0	0	0
50753	Fbxo8	3	1	2	0.111111	0.181818	0	0	0	1	0	1	0	0	0	0	0	1	0	0	0	0	0	0	0	0	0
51796	Srrm1	3	1	2	0.111111	0.181818	0	0	0	1	0	1	0	0	1	0	0	0	0	0	0	0	0	0	0	0	0
52245	Commd2	3	1	2	0.111111	0.181818	0	0	0	1	0	0	0	0	0	0	0	1	1	0	0	0	0	0	0	0	0
53375	Mtx2	3	1	2	0.111111	0.181818	0	0	0	1	0	0	0	0	0	0	0	1	1	0	0	0	0	0	0	0	0
56330	Pdcd5	3	1	2	0.111111	0.181818	0	0	0	1	0	0	0	0	0	0	0	1	1	0	0	0	0	0	0	0	0
57312	Mrps31	3	1	2	0.111111	0.181818	0	0	0	1	0	1	0	0	0	0	0	1	0	0	0	0	0	0	0	0	0
57439	Tmem183a	3	1	2	0.111111	0.181818	0	0	0	1	0	1	0	0	0	0	0	1	0	0	0	0	0	0	0	0	0
59026	Huwe1	3	1	2	0.111111	0.181818	0	0	0	1	0	1	0	0	1	0	0	0	0	0	0	0	0	0	0	0	0
60321	Wbp11	3	1	2	0.111111	0.181818	0	0	0	1	0	0	0	0	0	0	0	1	1	0	0	0	0	0	0	0	0
60440	Iigp1	3	1	2	0.111111	0.181818	0	0	0	1	0	1	0	0	0	0	0	0	0	1	0	0	0	0	0	0	0
64074	Smoc2	3	1	2	0.111111	0.181818	0	0	0	1	0	0	1	0	0	0	0	0	0	1	0	0	0	0	0	0	0
64658	Mrps25	3	1	2	0.111111	0.181818	0	0	0	1	0	0	0	0	0	0	0	1	1	0	0	0	0	0	0	0	0
65114	Vps35	3	1	2	0.111111	0.181818	0	0	0	1	0	0	0	0	0	0	0	1	1	0	0	0	0	0	0	0	0
66357	Ostc	3	1	2	0.111111	0.181818	0	0	0	1	0	0	0	0	0	0	0	1	1	0	0	0	0	0	0	0	0
66410	Mterf3	3	1	2	0.111111	0.181818	0	0	0	1	0	1	0	0	0	0	0	1	0	0	0	0	0	0	0	0	0
66626	Cdip1	3	1	2	0.111111	0.181818	0	0	0	1	0	1	0	0	0	0	0	1	0	0	0	0	0	0	0	0	0
66687	Tbc1d15	3	1	2	0.111111	0.181818	0	0	0	1	0	1	0	0	0	0	0	1	0	0	0	0	0	0	0	0	0
66917	Chordc1	3	1	2	0.111111	0.181818	0	0	0	1	0	0	0	0	0	0	0	1	1	0	0	0	0	0	0	0	0
67065	Polr3d	3	1	2	0.111111	0.181818	0	0	0	1	0	1	0	0	0	0	0	0	1	0	0	0	0	0	0	0	0
67180	Yipf5	3	1	2	0.111111	0.181818	0	0	0	1	0	0	0	0	0	0	1	1	0	0	0	0	0	0	0	0	0
67454	Ikbip	3	1	2	0.111111	0.181818	0	0	0	1	0	0	0	0	1	0	0	1	0	0	0	0	0	0	0	0	0
67917	Zcchc3	3	1	2	0.111111	0.181818	0	0	0	1	0	1	0	0	0	0	0	0	1	0	0	0	0	0	0	0	0
68115	9430016H08Rik	3	1	2	0.111111	0.181818	0	0	0	1	0	0	0	0	0	0	0	1	1	0	0	0	0	0	0	0	0
68493	Ndufaf4	3	1	2	0.111111	0.181818	0	0	0	1	0	1	0	0	0	0	0	1	0	0	0	0	0	0	0	0	0
69554	Klhdc2	3	1	2	0.111111	0.181818	0	0	0	1	0	0	0	0	0	0	0	1	1	0	0	0	0	0	0	0	0
70186	Fam162a	3	1	2	0.111111	0.181818	0	0	0	1	0	0	0	0	1	0	0	1	0	0	0	0	0	0	0	0	0
16601	Klf9	3	1	2	0.111111	0.181818	0	0	0	1	0	1	0	0	0	0	0	0	0	1	0	0	0	0	0	0	0
70802	Pwwp2a	3	1	2	0.111111	0.181818	0	0	0	1	0	0	0	0	1	0	0	0	1	0	0	0	0	0	0	0	0
70999	Naa40	3	1	2	0.111111	0.181818	0	0	0	1	0	0	0	0	0	0	0	1	1	0	0	0	0	0	0	0	0
74142	Lonp1	3	1	2	0.111111	0.181818	0	0	0	1	0	1	0	0	0	0	0	0	1	0	0	0	0	0	0	0	0
74155	Errfi1	3	1	2	0.111111	0.181818	0	0	0	1	0	1	0	0	0	0	0	0	0	1	0	0	0	0	0	0	0
74315	Rnf145	3	1	2	0.111111	0.181818	0	0	0	1	0	1	0	0	0	0	0	1	0	0	0	0	0	0	0	0	0
74766	Yipf2	3	1	2	0.111111	0.181818	0	0	0	1	0	0	0	0	1	0	0	0	1	0	0	0	0	0	0	0	0
76299	Erp44	3	1	2	0.111111	0.181818	0	0	0	1	0	0	0	0	0	0	0	1	1	0	0	0	0	0	0	0	0
76479	Smndc1	3	1	2	0.111111	0.181818	0	0	0	1	0	0	0	0	1	0	0	1	0	0	0	0	0	0	0	0	0
76551	Ccdc6	3	1	2	0.111111	0.181818	0	0	0	1	0	0	0	0	0	0	0	1	1	0	0	0	0	0	0	0	0
76892	Rnft1	3	1	2	0.111111	0.181818	0	0	0	1	0	1	0	0	0	0	0	1	0	0	0	0	0	0	0	0	0
76959	Chmp5	3	1	2	0.111111	0.181818	0	0	0	1	0	0	0	0	0	0	1	1	0	0	0	0	0	0	0	0	0
56248	Ak3	3	1	2	0.111111	0.181818	0	0	0	0	0	0	0	0	0	0	1	0	1	0	0	0	0	1	0	0	0
12651	Chkb	3	1	2	0.111111	0.181818	0	0	0	0	0	1	0	0	1	0	0	0	0	0	0	0	0	1	0	0	0
20698	Sphk1	3	1	2	0.111111	0.181818	0	0	0	0	0	1	0	0	0	0	1	0	0	0	0	0	0	1	0	0	0
217353	Tmc6	3	1	1	0.111111	0.0909091	0	0	0	0	0	0	0	0	0	0	1	0	0	0	1	0	0	0	1	0	0
67706	Tmem179b	3	1	2	0.111111	0.181818	0	0	0	0	0	0	0	0	1	0	0	0	1	0	0	0	0	0	1	0	0
18019	Nfatc2	3	1	2	0.111111	0.181818	0	0	0	0	1	1	0	0	0	0	0	0	0	0	0	0	0	0	1	0	0
15403	Hoxa6	3	1	2	0.111111	0.181818	0	0	0	0	0	1	0	0	0	0	0	0	1	0	0	0	0	0	1	0	0
74781	Wipi2	3	1	2	0.111111	0.181818	0	0	0	0	0	1	0	0	0	0	0	0	1	0	0	0	0	0	1	0	0
11787	Apbb2	3	0	3	0	0.272727	0	0	0	0	1	1	0	0	0	1	0	0	0	0	0	0	0	0	0	0	0
68021	Bphl	3	0	3	0	0.272727	0	0	0	0	1	0	1	0	0	1	0	0	0	0	0	0	0	0	0	0	0
12805	Cntn1	3	0	3	0	0.272727	0	0	0	0	1	0	0	0	0	1	0	0	0	1	0	0	0	0	0	0	0
15572	Elavl4	3	0	3	0	0.272727	0	0	0	0	1	0	0	0	0	1	0	0	1	0	0	0	0	0	0	0	0
14174	Fgf3	3	0	3	0	0.272727	0	0	0	0	1	1	0	0	0	0	0	0	1	0	0	0	0	0	0	0	0
67092	Gatm	3	0	3	0	0.272727	0	0	0	0	1	0	0	0	0	0	0	1	0	1	0	0	0	0	0	0	0
14998	H2-DMa	3	0	3	0	0.272727	0	0	0	0	1	1	0	0	0	0	0	0	0	1	0	0	0	0	0	0	0
17261	Mef2d	3	1	2	0.111111	0.181818	0	0	0	0	1	0	0	0	0	0	1	0	0	0	0	0	0	0	0	0	1
67041	Oxct1	3	0	3	0	0.272727	0	0	0	0	1	0	0	0	0	0	0	1	1	0	0	0	0	0	0	0	0
18605	Enpp1	3	0	3	0	0.272727	0	0	0	0	1	1	1	0	0	0	0	0	0	0	0	0	0	0	0	0	0
20317	Serpinf1	3	0	3	0	0.272727	0	0	0	0	1	1	0	0	0	0	0	0	0	1	0	0	0	0	0	0	0
72930	Ppp2r2b	3	0	3	0	0.272727	0	0	0	0	1	0	0	1	0	0	1	0	0	0	0	0	0	0	0	0	0
18749	Prkacb	3	0	3	0	0.272727	0	0	0	0	1	0	1	0	0	0	0	0	0	1	0	0	0	0	0	0	0
19218	Ptger3	3	0	3	0	0.272727	0	0	0	0	1	1	0	0	0	0	0	0	0	1	0	0	0	0	0	0	0
20102	Rps4x	3	0	3	0	0.272727	0	0	0	0	1	0	0	0	1	0	0	0	1	0	0	0	0	0	0	0	0
20597	Smpd1	3	0	3	0	0.272727	0	0	0	0	1	0	0	1	0	1	0	0	0	0	0	0	0	0	0	0	0
21846	Tie1	3	0	3	0	0.272727	0	0	0	0	1	1	0	0	0	0	0	0	0	1	0	0	0	0	0	0	0
22340	Vegfb	3	0	3	0	0.272727	0	0	0	0	1	1	0	0	0	1	0	0	0	0	0	0	0	0	0	0	0
14065	F2rl3	3	0	3	0	0.272727	0	0	0	0	1	1	0	0	0	0	0	0	0	1	0	0	0	0	0	0	0
277414	Trp53i11	3	0	3	0	0.272727	0	0	0	0	1	0	0	0	0	1	0	0	0	1	0	0	0	0	0	0	0
66867	Hmg20a	3	0	3	0	0.272727	0	0	0	0	1	0	0	0	0	0	1	0	0	1	0	0	0	0	0	0	0
66913	Kdelr2	3	0	3	0	0.272727	0	0	0	0	1	0	0	0	0	0	0	1	1	0	0	0	0	0	0	0	0
53609	Clasrp	3	0	3	0	0.272727	0	0	0	0	1	1	0	0	0	0	0	1	0	0	0	0	0	0	0	0	0
17064	Cd93	3	0	2	0	0.181818	0	0	0	0	1	0	0	0	0	0	0	1	0	0	1	0	0	0	0	0	0
103743	Tmem98	3	0	3	0	0.272727	0	0	0	0	1	0	0	0	0	1	0	0	0	1	0	0	0	0	0	0	0
18196	Nsg1	3	0	3	0	0.272727	0	0	0	0	1	0	0	0	1	1	0	0	0	0	0	0	0	0	0	0	0
27096	Trappc3	3	0	3	0	0.272727	0	0	0	0	1	0	0	0	0	1	0	1	0	0	0	0	0	0	0	0	0
56370	Tagln3	3	0	3	0	0.272727	0	0	0	0	1	0	0	0	0	1	0	0	0	1	0	0	0	0	0	0	0
59049	Slc22a17	3	0	3	0	0.272727	0	0	0	0	1	1	0	0	0	1	0	0	0	0	0	0	0	0	0	0	0
19416	Rasd1	3	0	3	0	0.272727	0	0	0	0	1	1	0	0	0	0	0	0	0	1	0	0	0	0	0	0	0
16564	Kif21a	3	0	3	0	0.272727	0	0	0	0	1	0	0	0	0	1	1	0	0	0	0	0	0	0	0	0	0
69225	Carkd	3	0	3	0	0.272727	0	0	0	0	1	0	0	0	0	1	1	0	0	0	0	0	0	0	0	0	0
19729	Slc50a1	3	0	3	0	0.272727	0	0	0	0	1	1	0	0	0	1	0	0	0	0	0	0	0	0	0	0	0
17063	Muc13	3	0	3	0	0.272727	0	0	0	0	1	1	0	0	0	0	0	0	0	1	0	0	0	0	0	0	0
17035	Lxn	3	0	3	0	0.272727	0	0	0	0	1	0	0	0	0	1	0	1	0	0	0	0	0	0	0	0	0
380967	Tmem106c	3	0	3	0	0.272727	0	0	0	0	1	0	0	0	0	1	1	0	0	0	0	0	0	0	0	0	0
71743	Coasy	3	0	3	0	0.272727	0	0	0	0	1	0	0	0	0	0	0	1	1	0	0	0	0	0	0	0	0
102657	Cd276	3	0	3	0	0.272727	0	0	0	0	1	0	0	1	0	1	0	0	0	0	0	0	0	0	0	0	0
74168	Zdhhc16	3	0	3	0	0.272727	0	0	0	0	1	0	0	0	0	1	0	1	0	0	0	0	0	0	0	0	0
78304	Naa38	3	0	3	0	0.272727	0	0	0	0	1	0	0	0	0	1	0	0	1	0	0	0	0	0	0	0	0
22700	Zfp40	3	0	3	0	0.272727	0	0	0	0	1	1	0	0	0	1	0	0	0	0	0	0	0	0	0	0	0
109042	Prkcdbp	3	0	3	0	0.272727	0	0	0	0	1	0	0	0	0	1	0	0	0	1	0	0	0	0	0	0	0
12193	Zfp36l2	3	0	3	0	0.272727	0	0	0	0	0	1	0	0	1	0	0	1	0	0	0	0	0	0	0	0	0
12509	Cd59a	3	0	3	0	0.272727	0	0	0	0	0	1	0	0	0	0	1	0	0	1	0	0	0	0	0	0	0
13047	Cux1	3	0	3	0	0.272727	0	0	0	0	0	1	0	1	0	0	0	0	1	0	0	0	0	0	0	0	0
13424	Dync1h1	3	0	3	0	0.272727	0	0	0	0	0	1	0	0	1	1	0	0	0	0	0	0	0	0	0	0	0
13537	Dusp2	3	0	3	0	0.272727	0	0	0	0	0	1	0	0	0	0	0	0	1	1	0	0	0	0	0	0	0
14043	Ext2	3	0	3	0	0.272727	0	0	0	0	0	1	0	0	0	1	0	1	0	0	0	0	0	0	0	0	0
14571	Gpd2	3	0	3	0	0.272727	0	0	0	0	0	1	0	0	0	0	0	1	1	0	0	0	0	0	0	0	0
14783	Grb10	3	0	3	0	0.272727	0	0	0	0	0	1	0	0	0	0	1	0	1	0	0	0	0	0	0	0	0
14809	Grik5	3	0	3	0	0.272727	0	0	0	0	0	1	0	1	1	0	0	0	0	0	0	0	0	0	0	0	0
14871	Gstt1	3	0	3	0	0.272727	0	0	0	0	0	1	0	0	0	1	0	1	0	0	0	0	0	0	0	0	0
14874	Gstz1	3	0	3	0	0.272727	0	0	0	0	0	1	0	0	0	1	0	0	1	0	0	0	0	0	0	0	0
15504	Dnajb3	3	0	3	0	0.272727	0	0	0	0	0	1	0	0	1	0	0	0	1	0	0	0	0	0	0	0	0
15936	Ier2	3	0	3	0	0.272727	0	0	0	0	0	1	0	0	0	0	0	0	1	1	0	0	0	0	0	0	0
15950	Ifi203	3	0	2	0	0.181818	0	0	0	0	0	1	0	0	0	0	0	0	0	1	1	0	0	0	0	0	0
16173	Il18	3	0	3	0	0.272727	0	0	0	0	0	1	0	0	0	1	0	0	0	1	0	0	0	0	0	0	0
16909	Lmo2	3	0	3	0	0.272727	0	0	0	0	0	1	0	0	0	0	0	0	1	1	0	0	0	0	0	0	0
17062	Ly6	3	0	3	0	0.272727	0	0	0	0	0	1	0	0	1	0	0	0	1	0	0	0	0	0	0	0	0
17984	Ndn	3	0	3	0	0.272727	0	0	0	0	0	1	0	1	0	0	0	0	0	1	0	0	0	0	0	0	0
18081	Ninj1	3	0	3	0	0.272727	0	0	0	0	0	1	0	0	1	0	1	0	0	0	0	0	0	0	0	0	0
18451	P4ha1	3	1	2	0.111111	0.181818	0	0	0	0	0	1	0	0	0	1	0	0	0	0	0	0	0	0	0	0	1
18584	Pde8a	3	0	3	0	0.272727	0	0	0	0	0	1	0	0	0	0	1	0	0	1	0	0	0	0	0	0	0
18647	Cdk14	3	0	3	0	0.272727	0	0	0	0	0	1	0	1	0	0	0	1	0	0	0	0	0	0	0	0	0
19122	Prnp	3	0	3	0	0.272727	0	0	0	0	0	1	0	0	0	1	1	0	0	0	0	0	0	0	0	0	0
19290	Pura	3	0	3	0	0.272727	0	0	0	0	0	1	0	0	0	0	1	0	0	1	0	0	0	0	0	0	0
19697	Rela	3	1	2	0.111111	0.181818	0	0	0	0	0	1	0	0	1	0	0	0	0	0	0	0	0	0	0	0	1
19698	Relb	3	1	2	0.111111	0.181818	0	0	0	0	0	1	0	0	0	0	0	0	0	1	0	0	0	0	0	0	1
20130	Rras	3	1	2	0.111111	0.181818	0	0	0	0	0	1	0	0	0	0	0	0	0	1	0	0	0	0	0	0	1
20196	S100a13	3	0	3	0	0.272727	0	0	0	0	0	1	0	0	0	0	1	0	0	1	0	0	0	0	0	0	0
20250	Scd2	3	0	3	0	0.272727	0	0	0	0	0	1	0	0	0	0	1	0	0	1	0	0	0	0	0	0	0
20509	Slc19a1	3	0	3	0	0.272727	0	0	0	0	0	1	0	0	1	0	0	1	0	0	0	0	0	0	0	0	0
20539	Slc7a5	3	0	3	0	0.272727	0	0	0	0	0	1	0	0	1	1	0	0	0	0	0	0	0	0	0	0	0
21346	Tagln2	3	0	3	0	0.272727	0	0	0	0	0	1	0	0	1	0	0	1	0	0	0	0	0	0	0	0	0
21366	Slc6a6	3	0	3	0	0.272727	0	0	0	0	0	1	0	0	0	0	1	0	0	1	0	0	0	0	0	0	0
21753	Tes	3	0	3	0	0.272727	0	0	0	0	0	1	0	0	0	0	0	0	1	1	0	0	0	0	0	0	0
21754	Tesk1	3	0	3	0	0.272727	0	0	0	0	0	1	0	1	0	0	0	0	0	1	0	0	0	0	0	0	0
21807	Tsc22d1	3	0	3	0	0.272727	0	0	0	0	0	1	0	0	0	0	1	0	0	1	0	0	0	0	0	0	0
22070	Tpt1	3	0	3	0	0.272727	0	0	0	0	0	1	0	0	1	0	0	0	1	0	0	0	0	0	0	0	0
22129	Ttc3	3	0	3	0	0.272727	0	0	0	0	0	1	0	0	0	0	1	0	0	1	0	0	0	0	0	0	0
22337	Vdr	3	0	3	0	0.272727	0	0	0	0	0	1	1	0	0	0	0	0	0	1	0	0	0	0	0	0	0
22359	Vldlr	3	0	3	0	0.272727	0	0	0	0	0	1	0	0	0	0	1	0	0	1	0	0	0	0	0	0	0
22644	Rnf103	3	0	3	0	0.272727	0	0	0	0	0	1	0	1	1	0	0	0	0	0	0	0	0	0	0	0	0
23964	Tenm2	3	0	3	0	0.272727	0	0	0	0	0	1	0	0	1	0	0	0	0	1	0	0	0	0	0	0	0
27973	Vkorc1	3	0	3	0	0.272727	0	0	0	0	0	1	0	0	0	1	1	0	0	0	0	0	0	0	0	0	0
28019	Ing4	3	0	3	0	0.272727	0	0	0	0	0	1	0	0	1	0	0	0	1	0	0	0	0	0	0	0	0
50523	Lats2	3	0	3	0	0.272727	0	0	0	0	0	1	0	1	0	0	0	0	0	1	0	0	0	0	0	0	0
50909	C1ra	3	0	3	0	0.272727	0	0	0	0	0	1	0	0	0	0	0	1	0	1	0	0	0	0	0	0	0
54126	Arhgef7	3	0	3	0	0.272727	0	0	0	0	0	1	0	0	1	0	0	0	1	0	0	0	0	0	0	0	0
54189	Rabep1	3	0	3	0	0.272727	0	0	0	0	0	1	0	0	0	0	0	1	0	1	0	0	0	0	0	0	0
54381	Cpq	3	0	2	0	0.181818	0	0	0	0	0	1	0	0	0	0	0	0	0	1	1	0	0	0	0	0	0
56378	Arpc3	3	0	3	0	0.272727	0	0	0	0	0	1	0	0	1	0	0	0	1	0	0	0	0	0	0	0	0
56389	Stx5a	3	0	3	0	0.272727	0	0	0	0	0	1	0	0	1	0	1	0	0	0	0	0	0	0	0	0	0
56437	Rrad	3	0	3	0	0.272727	0	0	0	0	0	1	0	0	1	0	0	0	0	1	0	0	0	0	0	0	0
59003	Maea	3	0	3	0	0.272727	0	0	0	0	0	1	0	0	0	0	0	1	1	0	0	0	0	0	0	0	0
65960	Twsg1	3	0	3	0	0.272727	0	0	0	0	0	1	0	0	1	0	0	0	1	0	0	0	0	0	0	0	0
66169	Tomm7	3	0	3	0	0.272727	0	0	0	0	0	1	0	0	1	0	0	0	1	0	0	0	0	0	0	0	0
66214	Rgcc	3	0	3	0	0.272727	0	0	0	0	0	1	0	1	0	0	1	0	0	0	0	0	0	0	0	0	0
66257	Nicn1	3	0	3	0	0.272727	0	0	0	0	0	1	0	0	0	1	0	0	0	1	0	0	0	0	0	0	0
66258	Mrps17	3	0	3	0	0.272727	0	0	0	0	0	1	0	0	1	0	0	0	1	0	0	0	0	0	0	0	0
66448	Mrpl20	3	0	3	0	0.272727	0	0	0	0	0	1	0	0	0	1	0	0	1	0	0	0	0	0	0	0	0
66505	Zmynd11	3	0	3	0	0.272727	0	0	0	0	0	1	0	0	0	0	1	0	0	1	0	0	0	0	0	0	0
66521	Rwdd1	3	0	3	0	0.272727	0	0	0	0	0	1	0	0	0	0	0	1	1	0	0	0	0	0	0	0	0
66704	Rbm4b	3	0	3	0	0.272727	0	0	0	0	0	1	0	1	1	0	0	0	0	0	0	0	0	0	0	0	0
67097	Rps10	3	0	3	0	0.272727	0	0	0	0	0	1	0	0	1	0	0	0	1	0	0	0	0	0	0	0	0
67130	Ndufa6	3	0	3	0	0.272727	0	0	0	0	0	1	0	0	0	1	1	0	0	0	0	0	0	0	0	0	0
67220	Plekho1	3	0	3	0	0.272727	0	0	0	0	0	1	0	0	1	0	0	0	1	0	0	0	0	0	0	0	0
67393	Cxxc5	3	0	3	0	0.272727	0	0	0	0	0	1	0	0	0	0	0	0	1	1	0	0	0	0	0	0	0
67414	Mfn1	3	0	3	0	0.272727	0	0	0	0	0	1	0	0	1	0	0	1	0	0	0	0	0	0	0	0	0
67443	Map1lc3b	3	0	3	0	0.272727	0	0	0	0	0	1	0	0	0	1	1	0	0	0	0	0	0	0	0	0	0
67887	Saraf	3	0	3	0	0.272727	0	0	0	0	0	1	0	0	0	0	1	0	0	1	0	0	0	0	0	0	0
68644	Abhd14a	3	0	2	0	0.181818	0	0	0	0	0	1	0	0	0	0	0	0	1	0	1	0	0	0	0	0	0
68966	Ngdn	3	0	3	0	0.272727	0	0	0	0	0	1	0	0	0	0	0	1	1	0	0	0	0	0	0	0	0
69683	Emc10	3	0	3	0	0.272727	0	0	0	0	0	1	0	0	1	0	1	0	0	0	0	0	0	0	0	0	0
69742	Tm2d2	3	0	3	0	0.272727	0	0	0	0	0	1	0	0	0	1	1	0	0	0	0	0	0	0	0	0	0
70397	Tmem70	3	0	3	0	0.272727	0	0	0	0	0	1	0	0	0	0	0	1	1	0	0	0	0	0	0	0	0
71678	Brox	3	0	3	0	0.272727	0	0	0	0	0	1	0	0	0	0	1	1	0	0	0	0	0	0	0	0	0
71914	Antxr2	3	0	3	0	0.272727	0	0	0	0	0	1	0	0	0	0	0	1	0	1	0	0	0	0	0	0	0
72181	Nsun4	3	0	3	0	0.272727	0	0	0	0	0	1	0	0	1	0	0	1	0	0	0	0	0	0	0	0	0
74091	Npl	3	0	3	0	0.272727	0	0	0	0	0	1	0	0	0	0	0	1	1	0	0	0	0	0	0	0	0
74316	Isca2	3	0	3	0	0.272727	0	0	0	0	0	1	0	0	0	1	0	0	1	0	0	0	0	0	0	0	0
76263	Gstk1	3	0	3	0	0.272727	0	0	0	0	0	1	0	0	0	0	0	0	1	1	0	0	0	0	0	0	0
76527	Il34	3	0	3	0	0.272727	0	0	0	0	0	1	0	0	1	0	0	1	0	0	0	0	0	0	0	0	0
80859	Nfkbiz	3	0	3	0	0.272727	0	0	0	0	0	1	0	0	1	0	0	0	0	1	0	0	0	0	0	0	0
16765	Stmn1	3	0	3	0	0.272727	0	0	0	0	0	0	1	0	1	0	0	0	1	0	0	0	0	0	0	0	0
19126	Prom1	3	0	3	0	0.272727	0	0	0	0	0	0	1	0	1	0	0	0	1	0	0	0	0	0	0	0	0
21841	Tia1	3	0	3	0	0.272727	0	0	0	0	0	0	1	0	1	0	1	0	0	0	0	0	0	0	0	0	0
18028	Nfib	3	0	3	0	0.272727	0	0	0	0	0	0	1	0	1	0	0	0	0	1	0	0	0	0	0	0	0
19891	Rpa2	3	0	3	0	0.272727	0	0	0	0	0	0	1	0	0	0	0	1	1	0	0	0	0	0	0	0	0
15354	Hmgb3	3	0	3	0	0.272727	0	0	0	0	0	0	1	0	1	0	0	0	1	0	0	0	0	0	0	0	0
19277	Ptpro	3	0	3	0	0.272727	0	0	0	0	0	0	1	1	1	0	0	0	0	0	0	0	0	0	0	0	0
14026	Evl	3	0	3	0	0.272727	0	0	0	0	0	0	1	0	0	0	0	0	1	1	0	0	0	0	0	0	0
70561	Txndc16	3	0	3	0	0.272727	0	0	0	0	0	0	1	0	0	0	1	0	0	1	0	0	0	0	0	0	0
67916	Ppap2b	3	0	3	0	0.272727	0	0	0	0	0	0	1	0	0	0	1	0	0	1	0	0	0	0	0	0	0
75292	Prkd3	3	0	3	0	0.272727	0	0	0	0	0	0	1	1	0	0	1	0	0	0	0	0	0	0	0	0	0
20216	Acsm3	3	0	3	0	0.272727	0	0	0	0	0	0	1	0	1	0	0	0	1	0	0	0	0	0	0	0	0
50770	Atp11a	3	0	3	0	0.272727	0	0	0	0	0	0	1	0	1	0	0	1	0	0	0	0	0	0	0	0	0
68682	Slc44a2	3	0	3	0	0.272727	0	0	0	0	0	0	1	0	1	0	1	0	0	0	0	0	0	0	0	0	0
11820	App	3	0	3	0	0.272727	0	0	0	0	0	0	1	0	0	0	1	0	0	1	0	0	0	0	0	0	0
11481	Acvr2b	3	0	3	0	0.272727	0	0	0	0	0	0	1	0	1	0	0	0	1	0	0	0	0	0	0	0	0
74055	Plce1	3	0	3	0	0.272727	0	0	0	0	0	0	1	0	0	1	1	0	0	0	0	0	0	0	0	0	0
18027	Nfia	3	0	3	0	0.272727	0	0	0	0	0	0	1	1	0	0	1	0	0	0	0	0	0	0	0	0	0
14163	Fgd1	3	0	3	0	0.272727	0	0	0	0	0	0	1	0	0	0	0	1	1	0	0	0	0	0	0	0	0
18111	Nnat	3	0	3	0	0.272727	0	0	0	0	0	0	0	1	1	0	0	0	1	0	0	0	0	0	0	0	0
77569	Limch1	3	0	3	0	0.272727	0	0	0	0	0	0	0	1	0	0	1	0	0	1	0	0	0	0	0	0	0
17932	Myt1	3	0	3	0	0.272727	0	0	0	0	0	0	0	1	1	0	0	0	1	0	0	0	0	0	0	0	0
14221	Fjx1	3	0	3	0	0.272727	0	0	0	0	0	0	0	1	0	1	0	0	1	0	0	0	0	0	0	0	0
20370	Sez6	3	0	2	0	0.181818	0	0	0	0	0	0	0	1	1	0	0	0	0	0	1	0	0	0	0	0	0
20394	Scg5	3	0	3	0	0.272727	0	0	0	0	0	0	0	1	0	1	0	0	0	1	0	0	0	0	0	0	0
18994	Pou3f4	3	0	3	0	0.272727	0	0	0	0	0	0	0	1	1	1	0	0	0	0	0	0	0	0	0	0	0
19262	Ptpra	3	0	3	0	0.272727	0	0	0	0	0	0	0	1	0	0	1	1	0	0	0	0	0	0	0	0	0
19270	Ptprg	3	0	3	0	0.272727	0	0	0	0	0	0	0	1	1	0	0	0	1	0	0	0	0	0	0	0	0
11520	Plin2	3	0	3	0	0.272727	0	0	0	0	0	0	0	0	1	0	0	1	1	0	0	0	0	0	0	0	0
11843	Arf4	3	0	3	0	0.272727	0	0	0	0	0	0	0	0	1	0	0	1	1	0	0	0	0	0	0	0	0
12055	Bcl7c	3	0	3	0	0.272727	0	0	0	0	0	0	0	0	1	0	0	1	1	0	0	0	0	0	0	0	0
12175	Bnip2	3	0	3	0	0.272727	0	0	0	0	0	0	0	0	1	0	0	1	1	0	0	0	0	0	0	0	0
12192	Zfp36l1	3	0	3	0	0.272727	0	0	0	0	0	0	0	0	1	0	1	0	1	0	0	0	0	0	0	0	0
12340	Capza1	3	0	3	0	0.272727	0	0	0	0	0	0	0	0	1	0	0	1	1	0	0	0	0	0	0	0	0
12453	Ccni	3	0	3	0	0.272727	0	0	0	0	0	0	0	0	1	0	1	1	0	0	0	0	0	0	0	0	0
12480	Cd1d2	3	0	3	0	0.272727	0	0	0	0	0	0	0	0	1	0	0	1	0	1	0	0	0	0	0	0	0
12492	Scarb2	3	0	3	0	0.272727	0	0	0	0	0	0	0	0	1	0	1	1	0	0	0	0	0	0	0	0	0
12894	Cpt1a	3	0	3	0	0.272727	0	0	0	0	0	0	0	0	1	0	1	1	0	0	0	0	0	0	0	0	0
13004	Ncan	3	0	3	0	0.272727	0	0	0	0	0	0	0	0	1	0	0	1	1	0	0	0	0	0	0	0	0
13193	Dcx	3	0	3	0	0.272727	0	0	0	0	0	0	0	0	1	1	0	0	1	0	0	0	0	0	0	0	0
13194	Ddb1	3	1	2	0.111111	0.181818	0	0	0	0	0	0	0	0	1	0	0	0	1	0	0	0	0	0	0	0	1
13649	Egfr	3	0	3	0	0.272727	0	0	0	0	0	0	0	0	1	1	0	1	0	0	0	0	0	0	0	0	0
13849	Ephx1	3	0	3	0	0.272727	0	0	0	0	0	0	0	0	1	1	0	1	0	0	0	0	0	0	0	0	0
14007	Celf2	3	0	3	0	0.272727	0	0	0	0	0	0	0	0	1	0	1	1	0	0	0	0	0	0	0	0	0
14248	Flii	3	0	3	0	0.272727	0	0	0	0	0	0	0	0	1	0	0	1	1	0	0	0	0	0	0	0	0
14674	Gna13	3	0	3	0	0.272727	0	0	0	0	0	0	0	0	1	0	1	1	0	0	0	0	0	0	0	0	0
14679	Gnai3	3	0	3	0	0.272727	0	0	0	0	0	0	0	0	1	0	0	1	1	0	0	0	0	0	0	0	0
14733	Gpc1	3	0	3	0	0.272727	0	0	0	0	0	0	0	0	1	0	1	0	1	0	0	0	0	0	0	0	0
15228	Foxg1	3	0	3	0	0.272727	0	0	0	0	0	0	0	0	1	1	0	0	1	0	0	0	0	0	0	0	0
15289	Hmgb1	3	0	3	0	0.272727	0	0	0	0	0	0	0	0	1	0	0	1	1	0	0	0	0	0	0	0	0
15331	Hmgn2	3	0	3	0	0.272727	0	0	0	0	0	0	0	0	1	0	0	1	1	0	0	0	0	0	0	0	0
15937	Ier3	3	0	3	0	0.272727	0	0	0	0	0	0	0	0	1	0	1	0	0	1	0	0	0	0	0	0	0
16332	Inppl1	3	0	3	0	0.272727	0	0	0	0	0	0	0	0	1	0	1	1	0	0	0	0	0	0	0	0	0
16571	Kif4	3	0	3	0	0.272727	0	0	0	0	0	0	0	0	1	0	0	1	1	0	0	0	0	0	0	0	0
16728	L1cam	3	0	3	0	0.272727	0	0	0	0	0	0	0	0	1	0	1	0	0	1	0	0	0	0	0	0	0
17164	Mapkapk2	3	0	3	0	0.272727	0	0	0	0	0	0	0	0	1	0	0	1	1	0	0	0	0	0	0	0	0
17345	Mki67	3	0	3	0	0.272727	0	0	0	0	0	0	0	0	1	0	0	1	1	0	0	0	0	0	0	0	0
17388	Mmp15	3	0	3	0	0.272727	0	0	0	0	0	0	0	0	1	0	1	1	0	0	0	0	0	0	0	0	0
17470	Cd200	3	0	3	0	0.272727	0	0	0	0	0	0	0	0	1	0	1	0	0	1	0	0	0	0	0	0	0
17888	Myh6	3	0	3	0	0.272727	0	0	0	0	0	0	0	0	1	0	0	1	1	0	0	0	0	0	0	0	0
17904	Myl6	3	0	3	0	0.272727	0	0	0	0	0	0	0	0	1	0	0	1	1	0	0	0	0	0	0	0	0
17997	Nedd1	3	0	3	0	0.272727	0	0	0	0	0	0	0	0	1	0	0	1	1	0	0	0	0	0	0	0	0
18008	Nes	3	0	3	0	0.272727	0	0	0	0	0	0	0	0	1	0	0	1	1	0	0	0	0	0	0	0	0
18115	Nnt	3	0	3	0	0.272727	0	0	0	0	0	0	0	0	1	0	0	1	1	0	0	0	0	0	0	0	0
18458	Pabpc1	3	0	3	0	0.272727	0	0	0	0	0	0	0	0	1	0	0	1	1	0	0	0	0	0	0	0	0
18611	Pea15a	3	0	3	0	0.272727	0	0	0	0	0	0	0	0	1	1	0	1	0	0	0	0	0	0	0	0	0
18791	Plat	3	0	3	0	0.272727	0	0	0	0	0	0	0	0	1	1	0	1	0	0	0	0	0	0	0	0	0
18805	Pld1	3	0	3	0	0.272727	0	0	0	0	0	0	0	0	1	0	1	1	0	0	0	0	0	0	0	0	0
19155	Npepps	3	0	3	0	0.272727	0	0	0	0	0	0	0	0	1	0	1	1	0	0	0	0	0	0	0	0	0
19242	Ptn	3	0	3	0	0.272727	0	0	0	0	0	0	0	0	1	0	0	1	0	1	0	0	0	0	0	0	0
19650	Rbl1	3	0	3	0	0.272727	0	0	0	0	0	0	0	0	1	0	0	1	1	0	0	0	0	0	0	0	0
19652	Rbm3	3	0	3	0	0.272727	0	0	0	0	0	0	0	0	1	0	0	1	1	0	0	0	0	0	0	0	0
19893	Rpgr	3	0	3	0	0.272727	0	0	0	0	0	0	0	0	1	0	0	1	1	0	0	0	0	0	0	0	0
19935	Mrpl23	3	0	3	0	0.272727	0	0	0	0	0	0	0	0	1	0	1	0	1	0	0	0	0	0	0	0	0
19982	Rpl36a	3	0	3	0	0.272727	0	0	0	0	0	0	0	0	1	0	0	1	1	0	0	0	0	0	0	0	0
100503670	Rpl5	3	0	3	0	0.272727	0	0	0	0	0	0	0	0	1	0	1	0	1	0	0	0	0	0	0	0	0
20055	Rps16	3	0	3	0	0.272727	0	0	0	0	0	0	0	0	1	0	0	1	1	0	0	0	0	0	0	0	0
20091	Rps3a1	3	0	3	0	0.272727	0	0	0	0	0	0	0	0	1	0	0	1	1	0	0	0	0	0	0	0	0
20104	Rps6	3	0	3	0	0.272727	0	0	0	0	0	0	0	0	1	0	1	0	1	0	0	0	0	0	0	0	0
20115	Rps7	3	0	3	0	0.272727	0	0	0	0	0	0	0	0	1	0	1	0	1	0	0	0	0	0	0	0	0
20133	Rrm1	3	0	3	0	0.272727	0	0	0	0	0	0	0	0	1	0	0	1	1	0	0	0	0	0	0	0	0
20185	Ncor1	3	0	3	0	0.272727	0	0	0	0	0	0	0	0	1	0	1	1	0	0	0	0	0	0	0	0	0
20397	Sgpl1	3	0	3	0	0.272727	0	0	0	0	0	0	0	0	1	0	0	1	1	0	0	0	0	0	0	0	0
20689	Sall3	3	1	2	0.111111	0.181818	0	0	0	0	0	0	0	0	1	0	0	1	0	0	0	0	0	0	0	0	1
20778	Scarb1	3	0	3	0	0.272727	0	0	0	0	0	0	0	0	1	0	1	1	0	0	0	0	0	0	0	0	0
21672	Prdx2	3	0	3	0	0.272727	0	0	0	0	0	0	0	0	1	0	1	0	1	0	0	0	0	0	0	0	0
21881	Tkt	3	0	3	0	0.272727	0	0	0	0	0	0	0	0	1	0	1	1	0	0	0	0	0	0	0	0	0
22323	Vasp	3	0	3	0	0.272727	0	0	0	0	0	0	0	0	1	0	0	1	1	0	0	0	0	0	0	0	0
22608	Ybx1	3	0	3	0	0.272727	0	0	0	0	0	0	0	0	1	0	0	1	1	0	0	0	0	0	0	0	0
26401	Map3k1	3	0	3	0	0.272727	0	0	0	0	0	0	0	0	1	0	1	1	0	0	0	0	0	0	0	0	0
26433	Plod3	3	0	3	0	0.272727	0	0	0	0	0	0	0	0	1	0	1	1	0	0	0	0	0	0	0	0	0
26914	H2afy	3	0	3	0	0.272727	0	0	0	0	0	0	0	0	1	0	0	1	1	0	0	0	0	0	0	0	0
53860	40057	3	0	3	0	0.272727	0	0	0	0	0	0	0	0	1	0	0	1	1	0	0	0	0	0	0	0	0
54367	Zfp326	3	0	3	0	0.272727	0	0	0	0	0	0	0	0	1	0	0	1	1	0	0	0	0	0	0	0	0
54411	Atp6ap1	3	0	3	0	0.272727	0	0	0	0	0	0	0	0	1	0	0	1	1	0	0	0	0	0	0	0	0
54725	Cadm1	3	0	3	0	0.272727	0	0	0	0	0	0	0	0	1	0	1	0	0	1	0	0	0	0	0	0	0
55927	Hes6	3	0	3	0	0.272727	0	0	0	0	0	0	0	0	1	0	0	1	1	0	0	0	0	0	0	0	0
56486	Gabarap	3	0	3	0	0.272727	0	0	0	0	0	0	0	0	1	0	1	0	1	0	0	0	0	0	0	0	0
59013	Hnrnph1	3	0	3	0	0.272727	0	0	0	0	0	0	0	0	1	0	0	1	1	0	0	0	0	0	0	0	0
59050	Nsa2	3	0	3	0	0.272727	0	0	0	0	0	0	0	0	1	0	1	0	1	0	0	0	0	0	0	0	0
65098	Zfand6	3	0	3	0	0.272727	0	0	0	0	0	0	0	0	1	0	1	1	0	0	0	0	0	0	0	0	0
66073	Txndc12	3	0	3	0	0.272727	0	0	0	0	0	0	0	0	1	0	0	1	1	0	0	0	0	0	0	0	0
66154	Tmem14c	3	0	3	0	0.272727	0	0	0	0	0	0	0	0	1	0	0	1	1	0	0	0	0	0	0	0	0
66171	Pgls	3	0	3	0	0.272727	0	0	0	0	0	0	0	0	1	0	0	1	1	0	0	0	0	0	0	0	0
66407	Mrps15	3	0	3	0	0.272727	0	0	0	0	0	0	0	0	1	0	0	1	1	0	0	0	0	0	0	0	0
66471	Anp32e	3	0	3	0	0.272727	0	0	0	0	0	0	0	0	1	0	0	1	1	0	0	0	0	0	0	0	0
66475	Rps23	3	0	3	0	0.272727	0	0	0	0	0	0	0	0	1	0	0	1	1	0	0	0	0	0	0	0	0
66646	Rpe	3	0	3	0	0.272727	0	0	0	0	0	0	0	0	1	0	1	1	0	0	0	0	0	0	0	0	0
66980	Zdhhc6	3	0	3	0	0.272727	0	0	0	0	0	0	0	0	1	0	0	1	1	0	0	0	0	0	0	0	0
67037	Pmf1	3	0	3	0	0.272727	0	0	0	0	0	0	0	0	1	0	0	1	1	0	0	0	0	0	0	0	0
67042	Ift27	3	0	3	0	0.272727	0	0	0	0	0	0	0	0	1	1	0	0	1	0	0	0	0	0	0	0	0
67149	Nkain1	3	0	3	0	0.272727	0	0	0	0	0	0	0	0	1	0	0	1	1	0	0	0	0	0	0	0	0
67281	Rpl37	3	0	3	0	0.272727	0	0	0	0	0	0	0	0	1	0	1	0	1	0	0	0	0	0	0	0	0
67437	Ssr3	3	0	3	0	0.272727	0	0	0	0	0	0	0	0	1	0	0	1	1	0	0	0	0	0	0	0	0
67781	Ilf2	3	0	3	0	0.272727	0	0	0	0	0	0	0	0	1	0	0	1	1	0	0	0	0	0	0	0	0
68026	2810417H13Rik	3	0	3	0	0.272727	0	0	0	0	0	0	0	0	1	0	0	1	1	0	0	0	0	0	0	0	0
68209	Rnaseh2c	3	0	3	0	0.272727	0	0	0	0	0	0	0	0	1	0	0	1	1	0	0	0	0	0	0	0	0
68970	Dcaf12	3	0	3	0	0.272727	0	0	0	0	0	0	0	0	1	0	1	1	0	0	0	0	0	0	0	0	0
69150	Snx4	3	0	3	0	0.272727	0	0	0	0	0	0	0	0	1	0	0	1	1	0	0	0	0	0	0	0	0
69159	Rhebl1	3	0	3	0	0.272727	0	0	0	0	0	0	0	0	1	0	0	1	1	0	0	0	0	0	0	0	0
72265	Tram1	3	0	3	0	0.272727	0	0	0	0	0	0	0	0	1	0	0	1	1	0	0	0	0	0	0	0	0
72568	Lin9	3	0	3	0	0.272727	0	0	0	0	0	0	0	0	1	0	0	1	1	0	0	0	0	0	0	0	0
72621	Pdzd11	3	0	3	0	0.272727	0	0	0	0	0	0	0	0	1	0	0	1	1	0	0	0	0	0	0	0	0
73112	Abracl	3	0	3	0	0.272727	0	0	0	0	0	0	0	0	1	0	0	1	1	0	0	0	0	0	0	0	0
73389	Hbp1	3	0	3	0	0.272727	0	0	0	0	0	0	0	0	1	0	1	1	0	0	0	0	0	0	0	0	0
76448	Ppp1r18	3	0	3	0	0.272727	0	0	0	0	0	0	0	0	1	0	0	0	1	1	0	0	0	0	0	0	0
81898	Sf3b1	3	0	3	0	0.272727	0	0	0	0	0	0	0	0	1	0	0	1	1	0	0	0	0	0	0	0	0
83814	Nedd4l	3	1	2	0.111111	0.181818	0	0	0	0	0	0	0	0	1	0	1	0	0	0	0	0	0	0	0	0	1
12839	Col9a1	3	0	3	0	0.272727	0	0	0	0	0	0	0	0	0	1	1	0	1	0	0	0	0	0	0	0	0
15254	Hint1	3	0	3	0	0.272727	0	0	0	0	0	0	0	0	0	1	0	1	1	0	0	0	0	0	0	0	0
20720	Serpine2	3	0	3	0	0.272727	0	0	0	0	0	0	0	0	0	1	1	1	0	0	0	0	0	0	0	0	0
56516	Rbms2	3	0	2	0	0.181818	0	0	0	0	0	0	0	0	0	1	0	0	1	0	1	0	0	0	0	0	0
20463	Cox7a2l	3	0	3	0	0.272727	0	0	0	0	0	0	0	0	0	1	1	0	1	0	0	0	0	0	0	0	0
26557	Homer2	3	0	3	0	0.272727	0	0	0	0	0	0	0	0	0	1	0	1	0	1	0	0	0	0	0	0	0
12304	Pdia4	3	0	3	0	0.272727	0	0	0	0	0	0	0	0	0	1	0	1	1	0	0	0	0	0	0	0	0
59042	Cope	3	0	3	0	0.272727	0	0	0	0	0	0	0	0	0	1	1	1	0	0	0	0	0	0	0	0	0
66075	Chchd3	3	0	3	0	0.272727	0	0	0	0	0	0	0	0	0	1	0	1	1	0	0	0	0	0	0	0	0
76824	Mtfr1l	3	0	3	0	0.272727	0	0	0	0	0	0	0	0	0	1	0	1	1	0	0	0	0	0	0	0	0
67991	Nacc2	3	0	3	0	0.272727	0	0	0	0	0	0	0	0	0	1	1	0	0	1	0	0	0	0	0	0	0
28193	Reep3	3	0	3	0	0.272727	0	0	0	0	0	0	0	0	0	1	1	0	0	1	0	0	0	0	0	0	0
67603	Dusp6	3	0	3	0	0.272727	0	0	0	0	0	0	0	0	0	0	1	1	1	0	0	0	0	0	0	0	0
56463	Snd1	3	0	3	0	0.272727	0	0	0	0	0	0	0	0	0	0	1	1	1	0	0	0	0	0	0	0	0
54673	Sh3glb1	3	0	3	0	0.272727	0	0	0	0	0	0	0	0	0	0	1	1	0	1	0	0	0	0	0	0	0
12814	Col11a1	3	0	3	0	0.272727	0	0	0	0	0	0	0	0	0	0	1	1	0	1	0	0	0	0	0	0	0
17181	Matn2	3	0	3	0	0.272727	0	0	0	0	0	0	0	0	0	0	1	1	0	1	0	0	0	0	0	0	0
53378	Sdcbp	3	0	3	0	0.272727	0	0	0	0	0	0	0	0	0	0	1	1	1	0	0	0	0	0	0	0	0
19283	Ptprz1	3	0	3	0	0.272727	0	0	0	0	0	0	0	0	0	0	1	1	1	0	0	0	0	0	0	0	0
16451	Jak1	3	1	2	0.111111	0.181818	0	0	0	0	0	0	0	0	0	0	1	0	0	1	0	0	0	0	0	0	1
26921	Map4k4	3	0	3	0	0.272727	0	0	0	0	0	0	0	0	0	0	1	1	1	0	0	0	0	0	0	0	0
12013	Bach1	3	0	3	0	0.272727	0	0	0	0	0	0	0	0	0	0	1	0	1	1	0	0	0	0	0	0	0
26356	Ing1	3	0	3	0	0.272727	0	0	0	0	0	0	0	0	0	0	1	1	1	0	0	0	0	0	0	0	0
19646	Rbbp4	3	1	2	0.111111	0.181818	0	0	0	0	0	0	0	0	0	0	0	1	1	0	0	0	0	0	0	0	1
20687	Sp3	3	1	2	0.111111	0.181818	0	0	0	0	0	0	0	0	0	0	0	1	1	0	0	0	0	0	0	0	1
21812	Tgfbr1	3	1	2	0.111111	0.181818	0	0	0	0	0	0	0	0	0	0	0	1	1	0	0	0	0	0	0	0	1
21930	Tnfaip6	3	0	3	0	0.272727	0	0	0	0	0	0	0	0	0	0	0	1	1	1	0	0	0	0	0	0	0
68801	Elovl5	3	0	3	0	0.272727	0	0	0	0	0	0	0	0	0	0	0	1	1	1	0	0	0	0	0	0	0
11450	Adipoq	2	1	1	0.111111	0.0909091	1	0	0	0	0	0	0	0	0	0	0	0	0	0	0	0	0	0	0	1	0
11674	Aldoa	2	1	1	0.111111	0.0909091	0	0	0	0	0	0	0	0	0	0	0	0	0	0	0	0	1	0	0	1	0
12006	Axin2	2	0	2	0	0.181818	0	0	0	0	0	0	1	0	0	0	0	0	0	0	0	0	0	0	0	1	0
12043	Bcl2	2	0	2	0	0.181818	0	0	0	0	0	0	1	0	0	0	0	0	0	0	0	0	0	0	0	1	0
12393	Runx2	2	0	2	0	0.181818	0	0	0	0	0	1	0	0	0	0	0	0	0	0	0	0	0	0	0	1	0
12759	Clu	2	0	2	0	0.181818	0	0	0	0	0	0	1	0	0	0	0	0	0	0	0	0	0	0	0	1	0
12767	Cxcr4	2	0	2	0	0.181818	0	0	0	0	0	0	0	0	0	0	0	0	1	0	0	0	0	0	0	1	0
12842	Col1a1	2	0	2	0	0.181818	0	0	0	0	0	0	0	0	0	0	0	0	0	1	0	0	0	0	0	1	0
12978	Csf1r	2	0	1	0	0.0909091	0	0	0	0	0	0	0	0	0	0	0	0	0	0	1	0	0	0	0	1	0
13176	Dcc	2	0	2	0	0.181818	0	0	0	0	0	0	0	0	0	0	0	1	0	0	0	0	0	0	0	1	0
13179	Dcn	2	1	1	0.111111	0.0909091	0	0	0	1	0	0	0	0	0	0	0	0	0	0	0	0	0	0	0	1	0
13653	Egr1	2	0	2	0	0.181818	0	0	0	0	0	1	0	0	0	0	0	0	0	0	0	0	0	0	0	1	0
14256	Flt3l	2	0	2	0	0.181818	0	0	0	0	0	1	0	0	0	0	0	0	0	0	0	0	0	0	0	1	0
14828	Hspa5	2	0	2	0	0.181818	0	0	0	0	0	0	0	0	0	0	0	0	1	0	0	0	0	0	0	1	0
15412	Hoxb4	2	0	2	0	0.181818	0	0	0	0	1	0	0	0	0	0	0	0	0	0	0	0	0	0	0	1	0
15423	Hoxc4	2	0	2	0	0.181818	0	0	0	0	0	0	0	0	0	0	0	0	0	1	0	0	0	0	0	1	0
15481	Hspa8	2	0	2	0	0.181818	0	0	0	0	0	0	0	0	0	0	0	0	1	0	0	0	0	0	0	1	0
15945	Cxcl10	2	1	1	0.111111	0.0909091	1	0	0	0	0	0	0	0	0	0	0	0	0	0	0	0	0	0	0	1	0
15978	Ifng	2	0	2	0	0.181818	0	0	0	0	0	0	0	0	0	0	0	0	0	1	0	0	0	0	0	1	0
16176	Il1b	2	0	2	0	0.181818	0	0	0	0	0	0	0	0	0	0	0	0	0	1	0	0	0	0	0	1	0
18034	Nfkb2	2	0	2	0	0.181818	0	0	0	0	0	1	0	0	0	0	0	0	0	0	0	0	0	0	0	1	0
18222	Numb	2	0	2	0	0.181818	0	0	0	0	0	0	0	0	0	0	1	0	0	0	0	0	0	0	0	1	0
18811	Prl2c2	2	1	1	0.111111	0.0909091	1	0	0	0	0	0	0	0	0	0	0	0	0	0	0	0	0	0	0	1	0
19226	Pth	2	0	2	0	0.181818	0	0	0	0	0	0	0	0	0	0	0	0	0	1	0	0	0	0	0	1	0
19228	Pth1r	2	0	2	0	0.181818	0	0	0	0	0	0	0	0	0	0	0	0	1	0	0	0	0	0	0	1	0
19651	Rbl2	2	1	1	0.111111	0.0909091	0	0	0	0	0	0	0	0	0	0	0	0	0	0	0	0	0	0	0	1	1
20296	Ccl2	2	1	1	0.111111	0.0909091	0	0	0	1	0	0	0	0	0	0	0	0	0	0	0	0	0	0	0	1	0
20304	Ccl5	2	0	2	0	0.181818	0	0	0	0	0	0	0	0	0	0	0	0	0	1	0	0	0	0	0	1	0
20311	Cxcl5	2	1	1	0.111111	0.0909091	0	0	0	1	0	0	0	0	0	0	0	0	0	0	0	0	0	0	0	1	0
20375	Spi1	2	0	2	0	0.181818	0	0	0	0	0	1	0	0	0	0	0	0	0	0	0	0	0	0	0	1	0
20423	Shh	2	1	1	0.111111	0.0909091	0	0	0	0	0	0	0	0	0	0	0	0	0	0	0	0	0	0	0	1	1
20656	Sod2	2	1	1	0.111111	0.0909091	0	0	0	1	0	0	0	0	0	0	0	0	0	0	0	0	0	0	0	1	0
20850	Stat5a	2	0	2	0	0.181818	0	0	0	0	0	1	0	0	0	0	0	0	0	0	0	0	0	0	0	1	0
21813	Tgfbr2	2	0	2	0	0.181818	0	0	0	0	0	0	0	0	0	0	1	0	0	0	0	0	0	0	0	1	0
21838	Thy1	2	0	2	0	0.181818	0	0	0	0	0	0	0	0	0	1	0	0	0	0	0	0	0	0	0	1	0
21937	Tnfrsf1a	2	0	2	0	0.181818	0	0	0	0	0	0	0	0	1	0	0	0	0	0	0	0	0	0	0	1	0
21938	Tnfrsf1b	2	0	2	0	0.181818	0	0	0	0	0	1	0	0	0	0	0	0	0	0	0	0	0	0	0	1	0
22339	Vegfa	2	0	2	0	0.181818	0	0	0	0	0	1	0	0	0	0	0	0	0	0	0	0	0	0	0	1	0
22408	Wnt1	2	0	2	0	0.181818	0	0	0	0	0	1	0	0	0	0	0	0	0	0	0	0	0	0	0	1	0
22416	Wnt3a	2	1	1	0.111111	0.0909091	0	0	0	0	0	0	0	0	0	0	0	0	0	0	0	0	0	0	0	1	1
22418	Wnt5a	2	1	1	0.111111	0.0909091	0	0	0	0	0	0	0	0	0	0	0	0	0	0	0	0	0	0	0	1	1
26450	Rbbp9	2	0	2	0	0.181818	0	0	0	0	0	1	0	0	0	0	0	0	0	0	0	0	0	0	0	1	0
56458	Foxo1	2	0	2	0	0.181818	0	0	0	0	0	0	0	0	0	0	1	0	0	0	0	0	0	0	0	1	0
109113	Uhrf2	2	0	2	0	0.181818	0	0	0	0	0	0	1	0	0	0	0	0	0	0	0	0	0	0	0	1	0
217082	Hlf	2	0	2	0	0.181818	0	0	0	0	0	0	0	0	0	0	0	0	0	1	0	0	0	0	0	1	0
21943	Tnfsf11	2	1	1	0.111111	0.0909091	0	0	0	1	0	0	0	0	0	0	0	0	0	0	0	0	0	0	0	1	0
73473	Iws1	2	2	0	0.222222	0	0	0	0	0	0	0	0	0	0	0	0	0	0	0	0	1	1	0	0	0	0
12313	Calm1	2	1	1	0.111111	0.0909091	0	0	0	0	0	0	0	0	0	0	1	0	0	0	0	1	0	0	0	0	0
208043	Setd1b	2	2	0	0.222222	0	0	0	0	0	0	0	0	0	0	0	0	0	0	0	0	1	1	0	0	0	0
67878	Tmem33	2	1	1	0.111111	0.0909091	0	0	0	0	0	0	0	0	0	1	0	0	0	0	0	1	0	0	0	0	0
26875	Pclo	2	1	1	0.111111	0.0909091	0	0	0	0	0	0	0	0	0	0	0	0	0	1	0	1	0	0	0	0	0
12265	Ciita	2	1	1	0.111111	0.0909091	0	0	0	0	0	0	1	0	0	0	0	0	0	0	0	1	0	0	0	0	0
94212	Pag1	2	1	1	0.111111	0.0909091	0	0	0	0	0	0	0	1	0	0	0	0	0	0	0	1	0	0	0	0	0
20452	St8sia4	2	1	1	0.111111	0.0909091	0	0	0	0	0	0	0	0	0	0	0	0	1	0	0	1	0	0	0	0	0
[truncated: 4,402 more rows]

## Sheet: S4
Supplementary Table S4 – Significant clusters of human ISS network.
Significant clusters (p-value < 5·10-2) are sorted according to their significance (from low to high p-values).
Average stemness score is the average of stemness scores (number of occurrences in individual stemness signatures) of nodes constituting the cluster.
Cluster	Size	Density	Internal weight	External weight	P-value	P-value rank	Average stemness score	Average stemness score rank	Members
A	34	0.345	193.5	45.54	0	1	3.82353	5	MSH6 RPA3 MSH2 POLE2 GMNN MCM5 MCM3 CDC6 MCM2 CDC7 MCM4 MCM6 CHEK2 CDC25A DSCC1 RFC4 PCNA CCNA2 RAD51AP1 PRIM1 FEN1 PARP1 APEX1 BLM DTL ORC1 MCM10 CHEK1 FANCL RAD51 RFC3 POLD1 XRCC5 TOP2A
C	30	0.4281	186.2	67.62	1.1635e-09	2	3.66667	8	PSMA3 CDC25A CCNA2 CDC20 NUP107 CCNB1 PSME3 MYBL2 ERCC6L CCNB2 CDCA5 BIRC5 SKP2 BUB1B NDC80 CENPE BUB1 CDK1 CKS1B RCC2 CENPF UBE2C CKS2 CENPA NCAPH SMC2 AURKB TTK XPO1 PTTG1
D	13	0.5574	43.47	12.7	9.69651e-06	3	5.69231	1	NANOG POU5F1 KLF4 PBX1 LIN28A ZSCAN10 PRDM14 SOX2 SALL4 EPHA1 ZIC3 FOXD3 DPPA4
F	11	0.8059	44.32	6.96	3.71096e-05	4	3.45455	10	SNRPD1 LSM7 SNRPA SNRPA1 HNRNPU SNRPF LSM5 DCP2 SRSF7 SNRPN SRSF3
E	11	0.6119	33.65	7.757	4.86129e-05	5	3.27273	11	RPS19 EIF4A1 RPL24 RPS3 RPSA EIF3K RPL6 RPL22 RPP40 EXOSC7 EIF6
B	19	0.5029	86	56.65	8.04662e-05	6	3.73684	6	MSH6 RPA3 MSH2 POLE2 DSCC1 RFC4 PCNA RAD51AP1 PRIM1 FEN1 PARP1 APEX1 BLM DTL FANCL RAD51 RFC3 POLD1 XRCC5
H	10	0.4738	21.32	10.82	0.000959117	7	3.7	7	KIT FGFR2 FGF2 FGFR3 KRAS FGFR1 TRIM24 FGFR4 GRB7 ANGPT1
G	4	0.9868	5.921	0.756	0.0127901	8	3.5	9	MRPL12 MRPL11 MRPL15 MRPL37
J	6	0.4309	6.464	3.61	0.0187904	9	4.33333	3	CHRDL1 BMPR1A ACVR2B TDGF1 LEFTY1 LEFTY2
I	7	0.3427	7.197	5.303	0.0224868	10	4.71429	2	HDAC2 DNMT3B FAM60A HINT1 CBX3 MBD2 FABP5
K	4	0.6055	3.633	2.7	0.0324916	11	4	4	TPX2 HAUS1 HMMR KPNA2

## Sheet: S5
Supplementary Table S5 – Significant clusters of mouse ISS network.
Significant clusters (p-value < 5·10-2) are sorted according to their significance (from low to high p-values).
Average stemness score is defined by the average of stemness scores (number of occurrences of a gene in individual stemness signatures) of nodes constituting the cluster.
Cluster	Size	Density	Internal weight	External weight	P-value	P-value rank	Average stemness score	Average stemness score rank	Members
A	23	0.3091	78.19	31.46	1.05483e-07	1	6.73913	6	Cdkn1a Psmd7 Psmd12 Cdk1 Ppp2r1b Plk1 Aurka Pttg1 Ccnb1 Cdc25c Cdca5 Bub1 Cdk4 Ccnd1 Bub3 Ttk Nek2 Trp53 Mdm2 Chek2 Cdc25a Csnk1e Ccnf
B	8	0.5173	14.48	0	0.000202677	2	7.5	1	Itgb1 Itga6 Col4a1 Tnc Col18a1 Crtap Col5a2 Serpinh1
C	7	0.4722	9.917	1.492	0.00084496	3	6.14286	13	Ddx18 Ddx54 Cebpz Brix1 Rpf1 Gnl3 Rpf2
D	8	0.3195	8.946	4.069	0.000929503	4	6.5	8	Ruvbl2 Ruvbl1 Cad Cops3 Cops4 Mtor Eif4ebp1 Hspd1
E	9	0.3084	11.1	5.336	0.00200023	5	6.44444	10	Polr1e Polr1c Nme4 Ezh2 Mybbp1a Ak1 Rrm2 Dtymk Pbx1
F	7	0.4646	9.756	3.446	0.00303225	6	6.57143	7	Rpsa Eif3a Rnps1 Rpl13a Eif3d Rpl7l1 Abce1
G	8	0.3363	9.415	4.237	0.00412208	7	6.25	12	Sp1 Yap1 Smad2 Smad7 Tgif1 Smad1 Inhbb Mvk
H	7	0.4054	8.514	3.462	0.00775263	8	6.85714	3	Yap1 Smad2 Tead2 Smad7 Tgif1 Smad1 Inhbb
I	9	0.3102	11.17	7.969	0.0101395	9	6.77778	4	Ywhaz Yap1 Smad2 Tead2 Smad7 Ddit4 Tgif1 Smad1 Csnk1e
J	4	0.9228	5.537	1.8	0.0127901	10	7	2	Srsf6 Srsf3 Eftud2 Rnps1
K	7	0.3989	8.377	4.595	0.0130704	11	6.42857	9	Polr1e Polr1c Nme4 Mybbp1a Ak1 Rrm2 Dtymk
L	7	0.365	7.665	5.079	0.0140298	12	6.85714	3	Ruvbl2 Ruvbl1 Cad Mtor Eif4ebp1 Rnf2 Hspd1
M	7	0.3214	6.749	5.876	0.0361861	13	6.57143	7	Ruvbl2 Ruvbl1 Cad Myc Mtor Hspd1 Pias2
N	7	0.7607	15.97	17.47	0.0368191	14	6.85714	3	Mcm2 Mcm3 Mcm4 Cdt1 Cdkn1a Pole2 Mcm5
O	3	0.626	1.878	0.902	0.0382613	15	6.33333	11	Fyn Sos1 Gab1
P	8	0.3061	8.57	8.206	0.0403157	16	6.75	5	Pole2 Nme4 Rrm2 Dtymk Msh2 Dctpp1 Rfc1 Xrcc5
