# Supplementary material for: Integration of Stemness Gene Signatures Reveals Core Functional Modules of Stem Cells and Potential Novel Stemness Genes
Source: Genes (Basel). 2023 Mar 18;14(3):745. doi: 10.3390/genes14030745 (PMC10048104; doi:10.3390/genes14030745)
Supplement: Supplementary file 1 [file genes-14-00745-s001.zip › Supplementary_Tables_S6_S10.xlsx]

## Sheet: S6
Supplementary Table S6 – Evolutionary conserved stemness genes.
Orthologous genes shared between human and mouse ISSs.
Human/Mouse gene score is the number of occurrences of that gene in individual human/mouse stemness signatures respectively.
Overall score for each gene is the sum of the scores of that gene in human and mouse ISSs.
Human symbol	Mouse symbol	Human gene id	Human gene score	Mouse gene id	Mouse gene score	Overal score
POU5F1	pou5f1	5460	12	18999	7	19
SOX2	sox2	6657	9	20674	8	17
MYCN	mycn	4613	7	18109	9	16
MSH2	msh2	4436	6	17685	8	14
MCM4	mcm4	4173	6	17217	7	13
APEX1	apex1	328	4	11792	8	12
CDK1	cdk1	983	5	12534	7	12
CHEK2	chek2	11200	5	50883	7	12
IMPDH2	impdh2	3615	4	23918	8	12
MCM3	mcm3	4172	4	17215	8	12
MYC	myc	4609	4	17869	8	12
PBX1	pbx1	5087	5	18514	7	12
SERPINH1	serpinh1	871	4	12406	8	12
MCM2	mcm2	4171	4	17216	7	11
MYBL2	mybl2	4605	4	17865	7	11
PTTG1	pttg1	9232	4	30939	7	11
SRSF3	srsf3	6428	4	20383	7	11

## Sheet: S7
Supplementary Table S7 – Node Betweeness and degree centrality for network of human ISS.
Nodes are sorted from highest to lowest values of betweeness and degree centralities.
Genes of small clusters isolated from the main network are in grey.
Name	Betweenness Centrality		Name	Degree Centrality
ADH5	0.761905		CDK1	34		Genes of small clusters isolated from the main network
GLDC	0.666667		CCNB1	30		Genes of the main network
GCSH	0.666667		AURKB	27
IMPDH2	0.571429		RPA3	27
PPAT	0.571429		POLE2	27
PFAS	0.52381		PCNA	26
ATIC	0.47619		CDC20	25
MYC	0.343418		NUP107	25
ALDH7A1	0.285714		CDC6	24
CYP26A1	0.285714		CCNB2	23
LCK	0.121385		MYC	23
STAT3	0.115796		BUB1B	22
NUP107	0.110655		CCNA2	22
TCF7L2	0.108781		BIRC5	22
PCNA	0.0991757		CENPE	20
CCNB1	0.0856091		RFC3	19
HDAC2	0.0792177		RFC4	19
BIRC5	0.0789819		ORC1	19
RPS3	0.0767033		POLD1	19
EIF4A1	0.0745171		PRIM1	19
KIT	0.0704427		CENPA	19
CDK1	0.0636923		CHEK1	18
NME2	0.0579774		MCM3	17
CHEK1	0.0508275		BUB1	17
TDGF1	0.0494562		NDC80	17
NME1	0.0493266		XPO1	17
CDC20	0.0455428		ERCC6L	17
KRAS	0.0441174		MCM2	16
PRIM1	0.0399205		MCM4	16
RPL24	0.0362287		CENPF	16
KLF4	0.0333994		RCC2	16
CDC25A	0.0317387		CDCA5	16
AURKB	0.0302815		PSMA3	15
MRPL12	0.0295522		POU5F1	15
PAK1	0.0295522		SOX2	15
NDC80	0.0288806		NANOG	15
CCNA2	0.0273663		MCM5	14
NCL	0.0271076		MCM6	14
TRIM24	0.026493		CDC7	13
FGF2	0.0260844		MCM10	13
MYB	0.0260273		BLM	13
HINT1	0.024665		CDC25A	13
POLE2	0.0233339		STAT3	13
RUVBL1	0.0229781		PSME3	13
SNRPA	0.022711		UBE2C	12
NPM1	0.0224015		GMNN	12
BAX	0.0218349		NME1	12
CDC6	0.020953		FEN1	11
POU5F1	0.020382		RPL24	11
SOX2	0.020382		SRSF7	11
NANOG	0.020382		APEX1	11
BUB1B	0.0202961		RPS3	10
SRSF7	0.0198938		SNRPD1	10
ACVR2B	0.0198259		SNRPF	10
TUBB2B	0.0198259		LSM5	10
ACTA1	0.019801		LSM7	10
DNMT3B	0.019801		SNRPA	10
UBE2C	0.0179553		FGF2	10
CENPE	0.0171561		SKP2	10
RPA3	0.0164387		TCF7L2	10
PHC1	0.0161026		SRSF3	10
SKP2	0.0156062		HNRNPU	10
CCND2	0.0153377		KRAS	10
LMNB1	0.0150853		RUVBL1	10
PSMA3	0.0139477		SNRPA1	9
POLD1	0.0137895		SNRPN	9
TCF7L1	0.0116268		RPL6	9
PHB	0.00995025		RAD51	9
PBX1	0.00995025		PBX1	9
BMPR1A	0.00995025		NPM1	9
RPP40	0.00995025		EIF4A1	9
TPX2	0.00995025		NME2	9
EIF6	0.00995025		SALL4	9
TPM1	0.00995025		LIN28A	9
HSPA9	0.00995025		KLF4	9
TGIF1	0.00995025		RPS19	8
SNRPD1	0.00994358		RPSA	8
SNRPF	0.00994358		MSH2	8
SRSF3	0.00994358		RPL22	8
ORC1	0.00930453		HDAC2	8
BLM	0.00925516		LCK	8
RPL6	0.00905783		PARP1	8
EXOSC7	0.00824294		RAD51AP1	8
IGF2BP1	0.00821622		KIT	8
CCNB2	0.00791737		PRDM14	8
HMGA1	0.00764937		ZSCAN10	8
ERCC6L	0.00728331		MSH6	7
HNRNPU	0.00692821		TCF7L1	7
CENPA	0.00669222		XRCC5	7
RFC3	0.00658204		TDGF1	7
RFC4	0.00658204		EIF3K	7
DCP2	0.00653621		ANGPT1	7
MCM4	0.00643558		SMC2	6
LSM5	0.00590065		FGFR1	6
LSM7	0.00590065		KIF20A	6
XPO1	0.00582324		DTL	6
APEX1	0.00578582		LMNB1	6
POLR3K	0.00501143		KIF23	6
POLR3G	0.00501143		NCAPH	5
SET	0.00469283		CKS2	5
ANGPT1	0.00466719		CKS1B	5
TOP2A	0.00430379		FGFR2	5
FGFR1	0.0034102		PTTG1	5
RPL22	0.00333194		FGFR3	5
SALL4	0.00329967		NCL	5
LIN28A	0.00329967		ADH5	5
RPS19	0.00320061		MYBL2	5
RPSA	0.00320061		SET	5
XRCC5	0.00297321		MYB	5
MSH2	0.00297275		POLR3K	5
PSME3	0.00250795		KIF11	5
KIF20A	0.00241029		TOP2A	5
KIF23	0.00241029		CCND2	5
BUB1	0.00218984		POLR3G	5
MCM3	0.00171019		FANCL	5
GMNN	0.00153751		MRPL12	4
SMC2	0.00147135		ACVR2B	4
CDC7	0.00120378		RPP40	4
MCM2	0.00113593		DNMT3B	4
RAD51	0.00077001		TPX2	4
MCM5	0.00074115		KIF4A	4
MCM6	0.00074115		TRIM24	4
EPHA1	0.0006751		EPHA1	4
MYBL2	0.00059346		GUCY1A3	4
KIF11	0.00052239		BAX	4
MCM10	0.00039936		EXOSC7	4
FEN1	0.00039435		HINT1	4
CD34	0.0003511		TUBB2B	4
TERF1	0.00018844		MRPL11	3
FGFR2	8.338e-05		MRPL15	3
FGFR3	8.338e-05		MRPL37	3
FGFR4	8.338e-05		FGFR4	3
CHEK2	6.962e-05		CHEK2	3
RRM2	6.118e-05		DSCC1	3
GUCY1A3	6.118e-05		TTK	3
MSH6	2.653e-05		ATIC	3
CKS2	2.418e-05		PAK1	3
CKS1B	2.418e-05		HMMR	3
MRPL11	0		HMGB2	3
MRPL15	0		FOXD3	3
PSMA2	0		TEAD4	3
SNRPA1	0		TEAD2	3
NCAPH	0		EIF6	3
MRPL37	0		ZIC3	3
SNRPN	0		DPPA4	3
PHB2	0		PHC1	3
CCNC	0		MIS18A	3
MED14	0		HSPA9	3
MBD2	0		PFAS	3
PTTG1	0		DCP2	3
MEIS1	0		HMGA1	3
DSCC1	0		GSTP1	3
TTK	0		HPGDS	3
PIPOX	0		HAUS1	3
PARP1	0		MGST1	3
POP7	0		PHB	2
MTHFD1	0		MBD2	2
MTHFD2	0		BMPR1A	2
RAD51AP1	0		IMPDH2	2
AASS	0		GLDC	2
GRB7	0		GCSH	2
HMMR	0		MTHFD1	2
HMGB2	0		MTHFD2	2
FOXD3	0		RRM2	2
CENPF	0		ALDH7A1	2
DTL	0		ACTA1	2
TEAD4	0		GRB7	2
TEAD2	0		SOCS2	2
SOCS2	0		LEFTY2	2
LEFTY2	0		LEFTY1	2
LEFTY1	0		MTF2	2
MTF2	0		JARID2	2
JARID2	0		TERF1	2
RCC2	0		TPM1	2
CDCA5	0		IGF2BP1	2
GNL3	0		HSPA14	2
KIF4A	0		HMGA2	2
UNG	0		SOX4	2
TNNI3	0		CD34	2
ZIC3	0		PTMA	2
PRDM14	0		FAM60A	2
DPPA4	0		SSB	2
CBX3	0		TGIF1	2
EIF3K	0		CYP26A1	2
MIS18A	0		TUBB2A	2
USP44	0		PPAT	2
CHAF1A	0		GJA1	2
SMARCC1	0		PRDX2	2
ZSCAN10	0		PRDX1	2
HSPA14	0		PSMA2	1
PAICS	0		PHB2	1
HMGA2	0		CCNC	1
EIF4EBP1	0		MED14	1
SOX4	0		MEIS1	1
KPNA2	0		PIPOX	1
FANCL	0		POP7	1
PITX2	0		AASS	1
PTMA	0		GNL3	1
CDCA7	0		UNG	1
GSTP1	0		TNNI3	1
FAM60A	0		CBX3	1
SSB	0		USP44	1
HPGDS	0		CHAF1A	1
HAUS1	0		SMARCC1	1
MGST1	0		PAICS	1
TK1	0		EIF4EBP1	1
HEY2	0		KPNA2	1
GATA6	0		PITX2	1
CRABP1	0		CDCA7	1
NDUFAB1	0		TK1	1
BCAT1	0		HEY2	1
B4GALT6	0		GATA6	1
LUM	0		CRABP1	1
PMAIP1	0		NDUFAB1	1
MPL	0		BCAT1	1
TUBB2A	0		B4GALT6	1
CHRDL1	0		LUM	1
FLT3	0		PMAIP1	1
FHL1	0		MPL	1
GJA1	0		CHRDL1	1
TGIF2	0		FLT3	1
RSL24D1	0		FHL1	1
HSPE1	0		TGIF2	1
LUC7L3	0		RSL24D1	1
PRDX2	0		HSPE1	1
PRDX1	0		LUC7L3	1
MYO5C	0		MYO5C	1
DSG2	0		DSG2	1
NAP1L1	0		NAP1L1	1
TRIP6	0		TRIP6	1
FABP5	0		FABP5	1
SEPHS1	0		SEPHS1	1

## Sheet: S8
Supplementary Table S8 – Reactome pathways overrepresented in significant clusters of human Integrative Stemness Signature network.
Cluster A
Pathway	Adjusted P-value	Count	Gene ID
DNA Replication	4.0554e-28	19	CCNA2/CDC6/CDC7/FEN1/GMNN/MCM10/MCM2/MCM3/MCM4/MCM5/MCM6/ORC1/PCNA/POLD1/POLE2/PRIM1/RFC3/RFC4/RPA3
Activation of ATR in response to replication stress	1.82204e-25	14	CDC25A/CDC6/CDC7/CHEK1/MCM10/MCM2/MCM3/MCM4/MCM5/MCM6/ORC1/RFC3/RFC4/RPA3
Synthesis of DNA	7.63403e-23	16	CCNA2/CDC6/FEN1/MCM2/MCM3/MCM4/MCM5/MCM6/ORC1/PCNA/POLD1/POLE2/PRIM1/RFC3/RFC4/RPA3
S Phase	1.80229e-22	17	CCNA2/CDC25A/CDC6/FEN1/MCM2/MCM3/MCM4/MCM5/MCM6/ORC1/PCNA/POLD1/POLE2/PRIM1/RFC3/RFC4/RPA3
Activation of the pre-replicative complex	5.87385e-22	12	CDC6/CDC7/MCM10/MCM2/MCM3/MCM4/MCM5/MCM6/ORC1/POLE2/PRIM1/RPA3
DNA strand elongation	5.87385e-22	12	FEN1/MCM2/MCM3/MCM4/MCM5/MCM6/PCNA/POLD1/PRIM1/RFC3/RFC4/RPA3
DNA Repair	1.89769e-21	20	APEX1/BLM/CCNA2/CHEK1/CHEK2/DTL/FANCL/FEN1/MSH2/MSH6/PARP1/PCNA/POLD1/POLE2/RAD51/RAD51AP1/RFC3/RFC4/RPA3/XRCC5
Mitotic G1-G1/S phases	1.92773e-20	16	CCNA2/CDC25A/CDC6/CDC7/MCM10/MCM2/MCM3/MCM4/MCM5/MCM6/ORC1/PCNA/POLE2/PRIM1/RPA3/TOP2A
G1/S Transition	1.41046e-19	15	CCNA2/CDC25A/CDC6/CDC7/MCM10/MCM2/MCM3/MCM4/MCM5/MCM6/ORC1/PCNA/POLE2/PRIM1/RPA3
G2/M Checkpoints	1.41046e-19	16	BLM/CDC25A/CDC6/CDC7/CHEK1/CHEK2/MCM10/MCM2/MCM3/MCM4/MCM5/MCM6/ORC1/RFC3/RFC4/RPA3
M/G1 Transition	1.75929e-18	13	CDC6/CDC7/GMNN/MCM10/MCM2/MCM3/MCM4/MCM5/MCM6/ORC1/POLE2/PRIM1/RPA3
DNA Replication Pre-Initiation	1.75929e-18	13	CDC6/CDC7/GMNN/MCM10/MCM2/MCM3/MCM4/MCM5/MCM6/ORC1/POLE2/PRIM1/RPA3
DNA Double-Strand Break Repair	5.40948e-18	15	BLM/CCNA2/CHEK1/CHEK2/FEN1/PARP1/PCNA/POLD1/POLE2/RAD51/RAD51AP1/RFC3/RFC4/RPA3/XRCC5
Cell Cycle Checkpoints	2.27134e-17	17	BLM/CCNA2/CDC25A/CDC6/CDC7/CHEK1/CHEK2/MCM10/MCM2/MCM3/MCM4/MCM5/MCM6/ORC1/RFC3/RFC4/RPA3
Resolution of AP sites via the multiple-nucleotide patch replacement pathway	3.08243e-16	9	APEX1/FEN1/PARP1/PCNA/POLD1/POLE2/RFC3/RFC4/RPA3
Homology Directed Repair	9.58517e-16	13	BLM/CCNA2/CHEK1/FEN1/PARP1/PCNA/POLD1/POLE2/RAD51/RAD51AP1/RFC3/RFC4/RPA3
PCNA-Dependent Long Patch Base Excision Repair	7.47828e-15	8	APEX1/FEN1/PCNA/POLD1/POLE2/RFC3/RFC4/RPA3
Base Excision Repair	1.6067e-14	9	APEX1/FEN1/PARP1/PCNA/POLD1/POLE2/RFC3/RFC4/RPA3
Resolution of Abasic Sites (AP sites)	1.6067e-14	9	APEX1/FEN1/PARP1/PCNA/POLD1/POLE2/RFC3/RFC4/RPA3
Telomere C-strand (Lagging Strand) Synthesis	2.28283e-14	8	FEN1/PCNA/POLD1/POLE2/PRIM1/RFC3/RFC4/RPA3
Cluster B
Pathway	Adjusted P-value	Count	Gene ID
DNA Repair	1.75785e-23	17	APEX1/BLM/DTL/FANCL/FEN1/MSH2/MSH6/PARP1/PCNA/POLD1/POLE2/RAD51/RAD51AP1/RFC3/RFC4/RPA3/XRCC5
Resolution of AP sites via the multiple-nucleotide patch replacement pathway	2.06932e-18	9	APEX1/FEN1/PARP1/PCNA/POLD1/POLE2/RFC3/RFC4/RPA3
Base Excision Repair	5.49881e-17	9	APEX1/FEN1/PARP1/PCNA/POLD1/POLE2/RFC3/RFC4/RPA3
Resolution of Abasic Sites (AP sites)	5.49881e-17	9	APEX1/FEN1/PARP1/PCNA/POLD1/POLE2/RFC3/RFC4/RPA3
PCNA-Dependent Long Patch Base Excision Repair	5.49881e-17	8	APEX1/FEN1/PCNA/POLD1/POLE2/RFC3/RFC4/RPA3
DNA Double-Strand Break Repair	5.49881e-17	12	BLM/FEN1/PARP1/PCNA/POLD1/POLE2/RAD51/RAD51AP1/RFC3/RFC4/RPA3/XRCC5
Telomere C-strand (Lagging Strand) Synthesis	1.45729e-16	8	FEN1/PCNA/POLD1/POLE2/PRIM1/RFC3/RFC4/RPA3
Homology Directed Repair	5.85651e-16	11	BLM/FEN1/PARP1/PCNA/POLD1/POLE2/RAD51/RAD51AP1/RFC3/RFC4/RPA3
Extension of Telomeres	8.97416e-16	8	FEN1/PCNA/POLD1/POLE2/PRIM1/RFC3/RFC4/RPA3
HDR through Homologous Recombination (HRR)	5.48617e-15	9	BLM/PCNA/POLD1/POLE2/RAD51/RAD51AP1/RFC3/RFC4/RPA3
Lagging Strand Synthesis	9.32511e-15	7	FEN1/PCNA/POLD1/PRIM1/RFC3/RFC4/RPA3
Recognition of DNA damage by PCNA-containing replication complex	2.22428e-13	7	DTL/PCNA/POLD1/POLE2/RFC3/RFC4/RPA3
DNA strand elongation	3.38836e-13	7	FEN1/PCNA/POLD1/PRIM1/RFC3/RFC4/RPA3
Dual Incision in GG-NER	2.06301e-12	7	PARP1/PCNA/POLD1/POLE2/RFC3/RFC4/RPA3
HDR through Homologous Recombination (HR) or Single Strand Annealing (SSA)	2.06301e-12	9	BLM/PCNA/POLD1/POLE2/RAD51/RAD51AP1/RFC3/RFC4/RPA3
Telomere Maintenance	2.94076e-12	8	FEN1/PCNA/POLD1/POLE2/PRIM1/RFC3/RFC4/RPA3
DNA Damage Bypass	5.58517e-12	7	DTL/PCNA/POLD1/POLE2/RFC3/RFC4/RPA3
Gap-filling DNA repair synthesis and ligation in GG-NER	1.12917e-11	6	PCNA/POLD1/POLE2/RFC3/RFC4/RPA3
Synthesis of DNA	1.27324e-11	8	FEN1/PCNA/POLD1/POLE2/PRIM1/RFC3/RFC4/RPA3
DNA Replication	2.27259e-11	8	FEN1/PCNA/POLD1/POLE2/PRIM1/RFC3/RFC4/RPA3
Cluster C
Pathway	Adjusted P-value	Count	Gene ID
M Phase	2.09013e-26	23	AURKB/BIRC5/BUB1/BUB1B/CCNB1/CCNB2/CDC20/CDCA5/CDK1/CENPA/CENPE/CENPF/ERCC6L/NCAPH/NDC80/NUP107/PSMA3/PSME3/PTTG1/RCC2/SMC2/UBE2C/XPO1
Cell Cycle Checkpoints	1.5329e-25	21	AURKB/BIRC5/BUB1/BUB1B/CCNA2/CCNB1/CCNB2/CDC20/CDC25A/CDK1/CENPA/CENPE/CENPF/ERCC6L/NDC80/NUP107/PSMA3/PSME3/RCC2/UBE2C/XPO1
Mitotic Prometaphase	4.75573e-25	19	AURKB/BIRC5/BUB1/BUB1B/CCNB1/CCNB2/CDC20/CDCA5/CDK1/CENPA/CENPE/CENPF/ERCC6L/NCAPH/NDC80/NUP107/RCC2/SMC2/XPO1
Resolution of Sister Chromatid Cohesion	1.10512e-24	17	AURKB/BIRC5/BUB1/BUB1B/CCNB1/CCNB2/CDC20/CDCA5/CDK1/CENPA/CENPE/CENPF/ERCC6L/NDC80/NUP107/RCC2/XPO1
Separation of Sister Chromatids	1.2985e-23	18	AURKB/BIRC5/BUB1/BUB1B/CDC20/CDCA5/CENPA/CENPE/CENPF/ERCC6L/NDC80/NUP107/PSMA3/PSME3/PTTG1/RCC2/UBE2C/XPO1
Mitotic Anaphase	2.88881e-23	18	AURKB/BIRC5/BUB1/BUB1B/CDC20/CDCA5/CENPA/CENPE/CENPF/ERCC6L/NDC80/NUP107/PSMA3/PSME3/PTTG1/RCC2/UBE2C/XPO1
Mitotic Metaphase and Anaphase	2.88881e-23	18	AURKB/BIRC5/BUB1/BUB1B/CDC20/CDCA5/CENPA/CENPE/CENPF/ERCC6L/NDC80/NUP107/PSMA3/PSME3/PTTG1/RCC2/UBE2C/XPO1
Mitotic Spindle Checkpoint	1.29081e-19	14	AURKB/BIRC5/BUB1/BUB1B/CDC20/CENPA/CENPE/CENPF/ERCC6L/NDC80/NUP107/RCC2/UBE2C/XPO1
Amplification of signal from the kinetochores	1.22568e-18	13	AURKB/BIRC5/BUB1/BUB1B/CDC20/CENPA/CENPE/CENPF/ERCC6L/NDC80/NUP107/RCC2/XPO1
Amplification of signal from unattached kinetochores via a MAD2 inhibitory signal	1.22568e-18	13	AURKB/BIRC5/BUB1/BUB1B/CDC20/CENPA/CENPE/CENPF/ERCC6L/NDC80/NUP107/RCC2/XPO1
RHO GTPases Activate Formins	2.05421e-16	13	AURKB/BIRC5/BUB1/BUB1B/CDC20/CENPA/CENPE/CENPF/ERCC6L/NDC80/NUP107/RCC2/XPO1
APC/C-mediated degradation of cell cycle proteins	2.30152e-15	11	AURKB/BUB1B/CCNA2/CCNB1/CDC20/CDK1/PSMA3/PSME3/PTTG1/SKP2/UBE2C
Regulation of mitotic cell cycle	2.30152e-15	11	AURKB/BUB1B/CCNA2/CCNB1/CDC20/CDK1/PSMA3/PSME3/PTTG1/SKP2/UBE2C
APC/C:Cdc20 mediated degradation of mitotic proteins	3.53358e-12	9	BUB1B/CCNA2/CCNB1/CDC20/CDK1/PSMA3/PSME3/PTTG1/UBE2C
Activation of APC/C and APC/C:Cdc20 mediated degradation of mitotic proteins	3.73489e-12	9	BUB1B/CCNA2/CCNB1/CDC20/CDK1/PSMA3/PSME3/PTTG1/UBE2C
RHO GTPase Effectors	5.98663e-12	13	AURKB/BIRC5/BUB1/BUB1B/CDC20/CENPA/CENPE/CENPF/ERCC6L/NDC80/NUP107/RCC2/XPO1
Regulation of APC/C activators between G1/S and early anaphase	3.46739e-10	8	BUB1B/CCNA2/CCNB1/CDC20/CDK1/PSMA3/PSME3/UBE2C
Signaling by Rho GTPases	3.89769e-10	13	AURKB/BIRC5/BUB1/BUB1B/CDC20/CENPA/CENPE/CENPF/ERCC6L/NDC80/NUP107/RCC2/XPO1
Cyclin A/B1/B2 associated events during G2/M transition	4.91972e-10	6	CCNA2/CCNB1/CCNB2/CDC25A/CDK1/XPO1
G2/M Transition	5.41488e-10	10	CCNA2/CCNB1/CCNB2/CDC25A/CDK1/CENPF/MYBL2/PSMA3/PSME3/XPO1
Cluster D
Pathway	Adjusted P-value	Count	Gene ID
Transcriptional regulation of pluripotent stem cells	1.48996e-32	13	DPPA4/EPHA1/FOXD3/KLF4/LIN28A/NANOG/PBX1/POU5F1/PRDM14/SALL4/SOX2/ZIC3/ZSCAN10
POU5F1 (OCT4), SOX2, NANOG activate genes related to proliferation	4.34934e-21	8	DPPA4/EPHA1/FOXD3/NANOG/POU5F1/SALL4/SOX2/ZIC3
POU5F1 (OCT4), SOX2, NANOG repress genes related to differentiation	9.43393e-09	3	NANOG/POU5F1/SOX2
Cluster E
Pathway	Adjusted P-value	Count	Gene ID
L13a-mediated translational silencing of Ceruloplasmin expression	1.23761e-13	8	EIF3K/EIF4A1/RPL22/RPL24/RPL6/RPS19/RPS3/RPSA
GTP hydrolysis and joining of the 60S ribosomal subunit	1.23761e-13	8	EIF3K/EIF4A1/RPL22/RPL24/RPL6/RPS19/RPS3/RPSA
Eukaryotic Translation Initiation	1.23761e-13	8	EIF3K/EIF4A1/RPL22/RPL24/RPL6/RPS19/RPS3/RPSA
Cap-dependent Translation Initiation	1.23761e-13	8	EIF3K/EIF4A1/RPL22/RPL24/RPL6/RPS19/RPS3/RPSA
Major pathway of rRNA processing in the nucleolus and cytosol	3.17682e-12	8	EXOSC7/RPL22/RPL24/RPL6/RPP40/RPS19/RPS3/RPSA
rRNA processing in the nucleus and cytosol	4.05908e-12	8	EXOSC7/RPL22/RPL24/RPL6/RPP40/RPS19/RPS3/RPSA
rRNA processing	4.73575e-12	8	EXOSC7/RPL22/RPL24/RPL6/RPP40/RPS19/RPS3/RPSA
Formation of a pool of free 40S subunits	4.73575e-12	7	EIF3K/RPL22/RPL24/RPL6/RPS19/RPS3/RPSA
Translation	7.06316e-11	8	EIF3K/EIF4A1/RPL22/RPL24/RPL6/RPS19/RPS3/RPSA
Peptide chain elongation	2.82536e-10	6	RPL22/RPL24/RPL6/RPS19/RPS3/RPSA
Viral mRNA Translation	2.82536e-10	6	RPL22/RPL24/RPL6/RPS19/RPS3/RPSA
Eukaryotic Translation Elongation	2.89925e-10	6	RPL22/RPL24/RPL6/RPS19/RPS3/RPSA
Selenocysteine synthesis	2.89925e-10	6	RPL22/RPL24/RPL6/RPS19/RPS3/RPSA
Eukaryotic Translation Termination	2.89925e-10	6	RPL22/RPL24/RPL6/RPS19/RPS3/RPSA
Nonsense Mediated Decay (NMD) independent of the Exon Junction Complex (EJC)	3.07893e-10	6	RPL22/RPL24/RPL6/RPS19/RPS3/RPSA
SRP-dependent cotranslational protein targeting to membrane	7.82282e-10	6	RPL22/RPL24/RPL6/RPS19/RPS3/RPSA
Nonsense-Mediated Decay (NMD)	8.15828e-10	6	RPL22/RPL24/RPL6/RPS19/RPS3/RPSA
Nonsense Mediated Decay (NMD) enhanced by the Exon Junction Complex (EJC)	8.15828e-10	6	RPL22/RPL24/RPL6/RPS19/RPS3/RPSA
Selenoamino acid metabolism	9.0299e-10	6	RPL22/RPL24/RPL6/RPS19/RPS3/RPSA
Influenza Viral RNA Transcription and Replication	1.76569e-09	6	RPL22/RPL24/RPL6/RPS19/RPS3/RPSA
Cluster F
Pathway	Adjusted P-value	Count	Gene ID
mRNA Splicing - Major Pathway	4.30818e-16	10	HNRNPU/LSM5/LSM7/SNRPA/SNRPA1/SNRPD1/SNRPF/SNRPN/SRSF3/SRSF7
mRNA Splicing	4.30818e-16	10	HNRNPU/LSM5/LSM7/SNRPA/SNRPA1/SNRPD1/SNRPF/SNRPN/SRSF3/SRSF7
Processing of Capped Intron-Containing Pre-mRNA	3.34582e-15	10	HNRNPU/LSM5/LSM7/SNRPA/SNRPA1/SNRPD1/SNRPF/SNRPN/SRSF3/SRSF7
mRNA decay by 5' to 3' exoribonuclease	2.42708e-06	3	DCP2/LSM5/LSM7
mRNA Splicing - Minor Pathway	9.23302e-05	3	SNRPD1/SNRPF/SRSF7
Deadenylation-dependent mRNA decay	9.62868e-05	3	DCP2/LSM5/LSM7
Cleavage of Growing Transcript in the Termination Region	0.000124015	3	SNRPF/SRSF3/SRSF7
RNA Polymerase II Transcription Termination	0.000124015	3	SNRPF/SRSF3/SRSF7
snRNP Assembly	0.00322426	2	SNRPD1/SNRPF
Metabolism of non-coding RNA	0.00322426	2	SNRPD1/SNRPF
mRNA 3'-end processing	0.00364146	2	SRSF3/SRSF7
Transport of Mature mRNA derived from an Intron-Containing Transcript	0.00540455	2	SRSF3/SRSF7
Transport of Mature Transcript to Cytoplasm	0.00625313	2	SRSF3/SRSF7
Cluster G
Pathway	Adjusted P-value	Count	Gene ID
Mitochondrial translation initiation	6.94244e-09	4	MRPL11/MRPL12/MRPL15/MRPL37
Mitochondrial translation elongation	6.94244e-09	4	MRPL11/MRPL12/MRPL15/MRPL37
Mitochondrial translation termination	6.94244e-09	4	MRPL11/MRPL12/MRPL15/MRPL37
Mitochondrial translation	6.94244e-09	4	MRPL11/MRPL12/MRPL15/MRPL37
Translation	5.8981e-07	4	MRPL11/MRPL12/MRPL15/MRPL37
Cluster H
Pathway	Adjusted P-value	Count	Gene ID
Signaling by FGFR in disease	3.60966e-12	7	FGF2/FGFR1/FGFR2/FGFR3/FGFR4/KRAS/TRIM24
IRS-mediated signalling	5.12622e-11	6	FGF2/FGFR1/FGFR2/FGFR3/FGFR4/KRAS
IRS-related events triggered by IGF1R	5.12622e-11	6	FGF2/FGFR1/FGFR2/FGFR3/FGFR4/KRAS
Signaling by Type 1 Insulin-like Growth Factor 1 Receptor (IGF1R)	5.12622e-11	6	FGF2/FGFR1/FGFR2/FGFR3/FGFR4/KRAS
IGF1R signaling cascade	5.12622e-11	6	FGF2/FGFR1/FGFR2/FGFR3/FGFR4/KRAS
Insulin receptor signalling cascade	5.12622e-11	6	FGF2/FGFR1/FGFR2/FGFR3/FGFR4/KRAS
RAF/MAP kinase cascade	6.97741e-11	8	ANGPT1/FGF2/FGFR1/FGFR2/FGFR3/FGFR4/KIT/KRAS
MAPK1/MAPK3 signaling	7.43407e-11	8	ANGPT1/FGF2/FGFR1/FGFR2/FGFR3/FGFR4/KIT/KRAS
Interleukin-20 family signaling	9.6603e-11	8	ANGPT1/FGF2/FGFR1/FGFR2/FGFR3/FGFR4/KIT/KRAS
Constitutive Signaling by Aberrant PI3K in Cancer	1.40419e-10	6	FGF2/FGFR1/FGFR2/FGFR3/FGFR4/KIT
MAPK family signaling cascades	1.74691e-10	8	ANGPT1/FGF2/FGFR1/FGFR2/FGFR3/FGFR4/KIT/KRAS
Signaling by Insulin receptor	2.84324e-10	6	FGF2/FGFR1/FGFR2/FGFR3/FGFR4/KRAS
Signaling by FGFR	6.556e-10	6	FGF2/FGFR1/FGFR2/FGFR3/FGFR4/KRAS
PI3K/AKT Signaling in Cancer	8.02506e-10	6	FGF2/FGFR1/FGFR2/FGFR3/FGFR4/KIT
PI5P, PP2A and IER3 Regulate PI3K/AKT Signaling	9.14017e-10	6	FGF2/FGFR1/FGFR2/FGFR3/FGFR4/KIT
Diseases of signal transduction	9.78863e-10	8	FGF2/FGFR1/FGFR2/FGFR3/FGFR4/KIT/KRAS/TRIM24
Negative regulation of the PI3K/AKT network	1.25241e-09	6	FGF2/FGFR1/FGFR2/FGFR3/FGFR4/KIT
PI3K Cascade	1.4908e-09	5	FGF2/FGFR1/FGFR2/FGFR3/FGFR4
Signaling by FGFR1 in disease	2.4268e-07	4	FGF2/FGFR1/KRAS/TRIM24
PIP3 activates AKT signaling	2.87256e-07	6	FGF2/FGFR1/FGFR2/FGFR3/FGFR4/KIT
Cluster I
Pathway	Adjusted P-value	Count	Gene ID
Epigenetic regulation of gene expression	8.07601e-06	4	CBX3/DNMT3B/HDAC2/MBD2
NoRC negatively regulates rRNA expression	0.000125124	3	DNMT3B/HDAC2/MBD2
Negative epigenetic regulation of rRNA expression	0.000125124	3	DNMT3B/HDAC2/MBD2
RNA Polymerase I Transcription	0.000125124	3	CBX3/HDAC2/MBD2
ERCC6 (CSB) and EHMT2 (G9a) positively regulate rRNA expression	0.00449989	2	CBX3/HDAC2
Positive epigenetic regulation of rRNA expression	0.00659633	2	CBX3/HDAC2
RNA Polymerase I Promoter Clearance	0.00659633	2	HDAC2/MBD2
Cluster J
Pathway	Adjusted P-value	Count	Gene ID
Regulation of signaling by NODAL	1.17943e-10	4	ACVR2B/LEFTY1/LEFTY2/TDGF1
Signaling by NODAL	8.64622e-10	4	ACVR2B/LEFTY1/LEFTY2/TDGF1
Signaling by BMP	1.35767e-06	3	ACVR2B/BMPR1A/CHRDL1
Signaling by TGF-beta family members	5.25239e-05	3	ACVR2B/BMPR1A/CHRDL1
Cluster K
Pathway	Adjusted P-value	Count	Gene ID
AURKA Activation by TPX2	4.12559e-05	3	HAUS1/HMMR/TPX2
G2/M Transition	0.000279201	3	HAUS1/HMMR/TPX2
Mitotic G2-G2/M phases	0.000279201	3	HAUS1/HMMR/TPX2

## Sheet: S9
Supplementary Table S9 – Node betweeness and degree centrality for mouse ISS network.
Nodes are sorted from highest to lowest values of betweeness and degree centralities.
Genes of small clusters isolated from the main network are in grey. Genes of medium size clusters isolated from the main network are in red.
Name	Betweenness Centrality		Name	Degree Centrality
Tjp1	1		Cdk1	21		Genes of small clusters isolated from the main network
Atp5c1	1		Plk1	16		Genes of medium size clusters isolated from the main network
Gsta4	1		Rpa3	14		Genes of the main network
Notch1	1		Cdkn1a	12
Rpf1	0.526316		Trp53	12
Rpl7l1	0.526316		Psmd12	12
Ddx54	0.381092		Psmd7	12
Col4a1	0.333333		Chek1	11
Ddx18	0.283626		Aurka	11
Rnps1	0.280702		Bub3	11
Rpl13a	0.260234		Cdk4	11
Rpsa	0.260234		Ccnb1	11
Nop58	0.204678		Ppp2r1b	10
Rpa3	0.199219		Gtf2h4	10
Itgb1	0.190476		Brca1	9
Trp53	0.186656		Cdc25a	9
Gtf2h4	0.183808		Ccnd1	9
Cdk1	0.133985		Pole2	8
Col18a1	0.119048		Mcm4	8
Cdkn1a	0.113332		Mcm3	8
Brca1	0.112983		Mcm2	8
Ccnd1	0.111321		Nme4	7
Ppp2r1b	0.110457		Yap1	7
Pole2	0.11025		Chek2	7
Eif3a	0.105263		Cdc25c	7
Polr1c	0.0865876		Ddx54	6
Yap1	0.086176		Csnk1e	6
Chek1	0.0822194		Col4a1	6
Nme4	0.0805884		Smad2	6
Cdk4	0.0722171		Cdt1	6
Itga6	0.0714286		Polr1c	6
Sp1	0.070077		Bub1	6
Rnf2	0.0655537		Ruvbl1	6
Myc	0.0617356		Rnf2	5
Psmd12	0.0596439		Cdca5	5
Psmd7	0.0596439		Nek2	5
Smad2	0.0568357		Rnps1	5
Ywhaz	0.0564826		Ezh2	5
Fyn	0.0454424		Col18a1	5
Ruvbl1	0.0449046		Ywhaz	5
Plk1	0.0429054		Rpl13a	5
Ccnb1	0.0380337		Rpsa	5
Cad	0.035056		Rpf1	4
Odc1	0.0342769		Brix1	4
Aurka	0.0244681		Cebpz	4
Ezh2	0.0242672		Rpf2	4
Rpf2	0.0233918		Ddx18	4
Mcm4	0.0230483		Myc	4
Mcm3	0.0230483		Crtap	4
Mcm2	0.0230483		Serpinh1	4
Xrcc5	0.0229885		Pttg1	4
Apex1	0.0229885		Col5a2	4
Sos1	0.0229885		Cad	4
Mtor	0.0229885		Odc1	4
Csnk1e	0.0224935		Brca2	4
Brix1	0.0214425		Ttk	4
Cebpz	0.0214425		Eif3a	4
Ruvbl2	0.0201041		Itgb1	4
Chek2	0.0185582		Mdm2	4
Cdt1	0.0184722		Ruvbl2	4
Cops3	0.014179		Mcm5	4
Cops4	0.014179		Ccnf	3
Dnmt3a	0.012861		Rpl7l1	3
Msh2	0.012708		Xrcc5	3
Cdc25a	0.0108547		Phc1	3
Cdc25c	0.0102418		Msh2	3
Mdm2	0.00821888		Cdkn1c	3
Phc1	0.0049462		Eftud2	3
Bub3	0.00469264		Dnmt3a	3
Ccnf	0.00056736		Rrm2	3
Cdkn1c	0.00056736		Smad1	3
Brca2	0.00041351		Nop58	3
Bub1	0.00039104		Sp1	3
Nek2	0.00013365		Smad7	3
Rrm2	0.00013365		Eif3d	3
Esf1	0		Srsf3	3
Abce1	0		Srsf6	3
Gnpat	0		Itga6	3
Lpin1	0		Mtor	3
Slc2a1	0		Cops3	3
Marcksl1	0		Cops4	3
Marcks	0		Tjp1	2
Shroom3	0		Gnl3	2
Pias2	0		Atp5c1	2
Cttn	0		Dctpp1	2
Hspd1	0		Gsta4	2
Gnl3	0		Xrcc1	2
Rfc1	0		Pbx1	2
Atp5g2	0		Tnc	2
Adh5	0		Apex1	2
Mybbp1a	0		Dtymk	2
Ppa1	0		Ak1	2
Tinf2	0		Sos1	2
Mvk	0		Fyn	2
Dctpp1	0		Ctr9	2
Gpx7	0		Wdr61	2
Xrcc1	0		Notch1	2
Crtap	0		Polr1e	2
Serpinh1	0		Esf1	1
Pbx1	0		Abce1	1
Tnc	0		Gnpat	1
Ung	0		Lpin1	1
Cdca5	0		Slc2a1	1
Pttg1	0		Marcksl1	1
Ube2t	0		Marcks	1
Col5a2	0		Shroom3	1
Inhbb	0		Pias2	1
Gab1	0		Cttn	1
Bax	0		Hspd1	1
Eftud2	0		Rfc1	1
Dtymk	0		Atp5g2	1
Ak1	0		Adh5	1
Smad1	0		Mybbp1a	1
Srm	0		Ppa1	1
Rcl1	0		Tinf2	1
Kif20a	0		Mvk	1
Tead2	0		Gpx7	1
Ddit4	0		Ung	1
Tgif1	0		Ube2t	1
Hey1	0		Inhbb	1
Smad7	0		Gab1	1
Ctr9	0		Bax	1
Wdr61	0		Srm	1
Eif3d	0		Rcl1	1
Ttk	0		Kif20a	1
Mybl2	0		Tead2	1
Srsf3	0		Ddit4	1
Srsf6	0		Tgif1	1
Dll1	0		Hey1	1
Eif4ebp1	0		Mybl2	1
Dbt	0		Dll1	1
Bckdhb	0		Eif4ebp1	1
Polr1e	0		Dbt	1
Mcm5	0		Bckdhb	1

## Sheet: S10
Supplementary Table S10 – Reactome pathways overrepresented in significant clusters of mouse ISS network.
Cluster A
Pathway	Adjusted P-value	Count	Gene ID
Cell Cycle, Mitotic	5.74186e-20	19	Aurka/Bub1/Bub3/Ccnb1/Ccnd1/Cdc25a/Cdc25c/Cdca5/Cdk1/Cdk4/Cdkn1a/Csnk1e/Nek2/Plk1/Ppp2r1b/Psmd12/Psmd7/Pttg1/Trp53
G2/M Transition	1.28327e-15	13	Aurka/Ccnb1/Cdc25a/Cdc25c/Cdk1/Cdkn1a/Csnk1e/Nek2/Plk1/Ppp2r1b/Psmd12/Psmd7/Trp53
Mitotic G2-G2/M phases	1.28327e-15	13	Aurka/Ccnb1/Cdc25a/Cdc25c/Cdk1/Cdkn1a/Csnk1e/Nek2/Plk1/Ppp2r1b/Psmd12/Psmd7/Trp53
Cell Cycle Checkpoints	8.59148e-15	14	Bub1/Bub3/Ccnb1/Cdc25a/Cdc25c/Cdk1/Cdkn1a/Chek2/Mdm2/Plk1/Ppp2r1b/Psmd12/Psmd7/Trp53
APC/C-mediated degradation of cell cycle proteins	1.62878e-13	10	Aurka/Bub3/Ccnb1/Cdk1/Cdkn1a/Nek2/Plk1/Psmd12/Psmd7/Pttg1
Regulation of mitotic cell cycle	1.62878e-13	10	Aurka/Bub3/Ccnb1/Cdk1/Cdkn1a/Nek2/Plk1/Psmd12/Psmd7/Pttg1
M Phase	8.43358e-11	12	Bub1/Bub3/Ccnb1/Cdca5/Cdk1/Csnk1e/Nek2/Plk1/Ppp2r1b/Psmd12/Psmd7/Pttg1
Activation of APC/C and APC/C:Cdc20 mediated degradation of mitotic proteins	2.09762e-10	8	Bub3/Ccnb1/Cdk1/Nek2/Plk1/Psmd12/Psmd7/Pttg1
Cyclin A/B1/B2 associated events during G2/M transition	2.47306e-10	6	Ccnb1/Cdc25a/Cdc25c/Cdk1/Plk1/Ppp2r1b
The role of GTSE1 in G2/M progression after G2 checkpoint	2.01668e-09	7	Ccnb1/Cdk1/Cdkn1a/Plk1/Psmd12/Psmd7/Trp53
G1/S DNA Damage Checkpoints	3.66328e-09	7	Cdc25a/Cdkn1a/Chek2/Mdm2/Psmd12/Psmd7/Trp53
Mitotic Prometaphase	5.69707e-09	9	Bub1/Bub3/Ccnb1/Cdca5/Cdk1/Csnk1e/Nek2/Plk1/Ppp2r1b
APC/C:Cdc20 mediated degradation of mitotic proteins	7.79213e-09	7	Bub3/Ccnb1/Cdk1/Nek2/Psmd12/Psmd7/Pttg1
Regulation of APC/C activators between G1/S and early anaphase	1.37116e-08	7	Bub3/Ccnb1/Cdk1/Cdkn1a/Plk1/Psmd12/Psmd7
G2/M Checkpoints	2.38411e-08	8	Ccnb1/Cdc25a/Cdc25c/Cdk1/Chek2/Psmd12/Psmd7/Trp53
Separation of Sister Chromatids	7.79044e-08	8	Bub1/Bub3/Cdca5/Plk1/Ppp2r1b/Psmd12/Psmd7/Pttg1
Resolution of Sister Chromatid Cohesion	7.95901e-08	7	Bub1/Bub3/Ccnb1/Cdca5/Cdk1/Plk1/Ppp2r1b
Mitotic Anaphase	8.54384e-08	8	Bub1/Bub3/Cdca5/Plk1/Ppp2r1b/Psmd12/Psmd7/Pttg1
Transcriptional Regulation by TP53	8.54384e-08	9	Aurka/Ccnb1/Cdc25c/Cdk1/Cdkn1a/Chek2/Mdm2/Ppp2r1b/Trp53
Mitotic Metaphase and Anaphase	8.54384e-08	8	Bub1/Bub3/Cdca5/Plk1/Ppp2r1b/Psmd12/Psmd7/Pttg1
Cluster B
Pathway	Adjusted P-value	Count	Gene ID
Extracellular matrix organization	3.44157e-11	8	Col18a1/Col4a1/Col5a2/Crtap/Itga6/Itgb1/Serpinh1/Tnc
Collagen formation	1.38109e-10	6	Col18a1/Col4a1/Col5a2/Crtap/Itga6/Serpinh1
Integrin cell surface interactions	1.38109e-10	6	Col18a1/Col4a1/Col5a2/Itga6/Itgb1/Tnc
Collagen biosynthesis and modifying enzymes	8.81726e-09	5	Col18a1/Col4a1/Col5a2/Crtap/Serpinh1
Laminin interactions	4.86403e-08	4	Col18a1/Col4a1/Itga6/Itgb1
Non-integrin membrane-ECM interactions	1.86131e-05	3	Col4a1/Col5a2/Itgb1
ECM proteoglycans	2.71802e-05	3	Col5a2/Itgb1/Tnc
Collagen chain trimerization	2.71802e-05	3	Col18a1/Col4a1/Col5a2
Assembly of collagen fibrils and other multimeric structures	2.99776e-05	3	Col4a1/Col5a2/Itga6
Collagen degradation	0.000101033	3	Col18a1/Col4a1/Col5a2
NCAM1 interactions	0.000461268	2	Col4a1/Col5a2
Degradation of the extracellular matrix	0.000571745	3	Col18a1/Col4a1/Col5a2
Basigin interactions	0.000682845	2	Itga6/Itgb1
MET activates PTK2 signaling	0.000917277	2	Col5a2/Itgb1
NCAM signaling for neurite out-growth	0.00123647	2	Col4a1/Col5a2
MET promotes cell motility	0.0015053	2	Col5a2/Itgb1
Signaling by PDGF	0.00264231	2	Col4a1/Col5a2
Axon guidance	0.00298151	3	Col4a1/Col5a2/Itgb1
Cell junction organization	0.00369579	2	Itga6/Itgb1
Localization of the PINCH-ILK-PARVIN complex to focal adhesions	0.00369579	1	Itgb1
Cluster C
Pathway	Adjusted P-value	Count	Gene ID
No enrichment
Cluster D
Pathway	Adjusted P-value	Count	Gene ID
DNA Damage Recognition in GG-NER	6.00885e-05	3	Cops3/Cops4/Ruvbl1
Global Genome Nucleotide Excision Repair (GG-NER)	0.000198945	3	Cops3/Cops4/Ruvbl1
Nucleotide Excision Repair	0.000366378	3	Cops3/Cops4/Ruvbl1
mTORC1-mediated signalling	0.00114943	2	Eif4ebp1/Mtor
mTOR signalling	0.00293426	2	Eif4ebp1/Mtor
DNA Repair	0.00359296	3	Cops3/Cops4/Ruvbl1
Formation of TC-NER Pre-Incision Complex	0.00359296	2	Cops3/Cops4
Transcription-Coupled Nucleotide Excision Repair (TC-NER)	0.00608965	2	Cops3/Cops4
Cargo recognition for clathrin-mediated endocytosis	0.00774285	2	Cops3/Cops4
Cluster E
Pathway	Adjusted P-value	Count	Gene ID
Interconversion of nucleotide di- and triphosphates	1.88481e-07	4	Ak1/Dtymk/Nme4/Rrm2
Epigenetic regulation of gene expression	5.49757e-06	4	Ezh2/Mybbp1a/Polr1c/Polr1e
Metabolism of nucleotides	1.125e-05	4	Ak1/Dtymk/Nme4/Rrm2
Positive epigenetic regulation of rRNA expression	9.18693e-05	3	Mybbp1a/Polr1c/Polr1e
B-WICH complex positively regulates rRNA expression	9.18693e-05	3	Mybbp1a/Polr1c/Polr1e
RNA Polymerase I Promoter Escape	0.00142178	2	Polr1c/Polr1e
RNA Polymerase I Transcription Termination	0.00142178	2	Polr1c/Polr1e
RNA Polymerase I Transcription Initiation	0.00268799	2	Polr1c/Polr1e
RNA Polymerase I Chain Elongation	0.00386805	2	Polr1c/Polr1e
RNA Polymerase I Promoter Clearance	0.00565278	2	Polr1c/Polr1e
RNA Polymerase I Transcription	0.00565278	2	Polr1c/Polr1e
NoRC negatively regulates rRNA expression	0.00679023	2	Polr1c/Polr1e
Cluster F
Pathway	Adjusted P-value	Count	Gene ID
Formation of a pool of free 40S subunits	1.68987e-06	4	Eif3a/Eif3d/Rpl13a/Rpsa
L13a-mediated translational silencing of Ceruloplasmin expression	1.68987e-06	4	Eif3a/Eif3d/Rpl13a/Rpsa
GTP hydrolysis and joining of the 60S ribosomal subunit	1.68987e-06	4	Eif3a/Eif3d/Rpl13a/Rpsa
Eukaryotic Translation Initiation	1.68987e-06	4	Eif3a/Eif3d/Rpl13a/Rpsa
Cap-dependent Translation Initiation	1.68987e-06	4	Eif3a/Eif3d/Rpl13a/Rpsa
Formation of the ternary complex, and subsequently, the 43S complex	1.33562e-05	3	Eif3a/Eif3d/Rpsa
Translation initiation complex formation	1.36398e-05	3	Eif3a/Eif3d/Rpsa
Ribosomal scanning and start codon recognition	1.36398e-05	3	Eif3a/Eif3d/Rpsa
Activation of the mRNA upon binding of the cap-binding complex and eIFs, and subsequent binding to 43S	1.36398e-05	3	Eif3a/Eif3d/Rpsa
Translation	1.36398e-05	4	Eif3a/Eif3d/Rpl13a/Rpsa
Nonsense-Mediated Decay (NMD)	6.76719e-05	3	Rnps1/Rpl13a/Rpsa
Nonsense Mediated Decay (NMD) enhanced by the Exon Junction Complex (EJC)	6.76719e-05	3	Rnps1/Rpl13a/Rpsa
SRP-dependent cotranslational protein targeting to membrane	0.00244244	2	Rpl13a/Rpsa
Nonsense Mediated Decay (NMD) independent of the Exon Junction Complex (EJC)	0.00244244	2	Rpl13a/Rpsa
Cluster G
Pathway	Adjusted P-value	Count	Gene ID
Signaling by TGF-beta family members	9.76106e-10	6	Inhbb/Smad1/Smad2/Smad7/Sp1/Tgif1
Transcriptional activity of SMAD2/SMAD3:SMAD4 heterotrimer	4.18774e-07	4	Smad2/Smad7/Sp1/Tgif1
Signaling by TGF-beta Receptor Complex	1.69027e-06	4	Smad2/Smad7/Sp1/Tgif1
SMAD2/SMAD3:SMAD4 heterotrimer regulates transcription	9.15321e-06	3	Smad2/Smad7/Sp1
Signaling by Activin	0.000359734	2	Inhbb/Smad2
Downregulation of TGF-beta receptor signaling	0.000460558	2	Smad2/Smad7
Downregulation of SMAD2/3:SMAD4 transcriptional activity	0.000725902	2	Smad2/Tgif1
TGF-beta receptor signaling activates SMADs	0.000725902	2	Smad2/Smad7
Signaling by BMP	0.000961816	2	Smad1/Smad7
Ub-specific processing proteases	0.00124418	3	Smad1/Smad2/Smad7
Deubiquitination	0.00296118	3	Smad1/Smad2/Smad7
RUNX3 regulates YAP1-mediated transcription	0.00477373	1	Yap1
Antagonism of Activin by Follistatin	0.00880591	1	Inhbb
Cluster H
Pathway	Adjusted P-value	Count	Gene ID
Signaling by TGF-beta family members	6.65264e-08	5	Inhbb/Smad1/Smad2/Smad7/Tgif1
Transcriptional activity of SMAD2/SMAD3:SMAD4 heterotrimer	4.4246e-05	3	Smad2/Smad7/Tgif1
YAP1- and WWTR1 (TAZ)-stimulated gene expression	8.40396e-05	2	Tead2/Yap1
Signaling by TGF-beta Receptor Complex	8.40396e-05	3	Smad2/Smad7/Tgif1
Signaling by Activin	0.000243897	2	Inhbb/Smad2
Downregulation of TGF-beta receptor signaling	0.000312327	2	Smad2/Smad7
Downregulation of SMAD2/3:SMAD4 transcriptional activity	0.000492537	2	Smad2/Tgif1
TGF-beta receptor signaling activates SMADs	0.000492537	2	Smad2/Smad7
SMAD2/SMAD3:SMAD4 heterotrimer regulates transcription	0.000518743	2	Smad2/Smad7
Signaling by BMP	0.000587574	2	Smad1/Smad7
Ub-specific processing proteases	0.000647968	3	Smad1/Smad2/Smad7
Deubiquitination	0.00156416	3	Smad1/Smad2/Smad7
RUNX3 regulates YAP1-mediated transcription	0.00348277	1	Yap1
Antagonism of Activin by Follistatin	0.00646352	1	Inhbb
Signaling by NODAL	0.00847749	1	Smad2
RUNX2 regulates bone development	0.00847749	1	Smad1
Cluster I
Pathway	Adjusted P-value	Count	Gene ID
Signaling by TGF-beta family members	9.41318e-05	4	Smad1/Smad2/Smad7/Tgif1
Transcriptional activity of SMAD2/SMAD3:SMAD4 heterotrimer	0.00025624	3	Smad2/Smad7/Tgif1
YAP1- and WWTR1 (TAZ)-stimulated gene expression	0.000456335	2	Tead2/Yap1
Signaling by TGF-beta Receptor Complex	0.000484839	3	Smad2/Smad7/Tgif1
Downregulation of TGF-beta receptor signaling	0.001557	2	Smad2/Smad7
Downregulation of SMAD2/3:SMAD4 transcriptional activity	0.00233593	2	Smad2/Tgif1
TGF-beta receptor signaling activates SMADs	0.00233593	2	Smad2/Smad7
SMAD2/SMAD3:SMAD4 heterotrimer regulates transcription	0.00242102	2	Smad2/Smad7
Signaling by BMP	0.00270716	2	Smad1/Smad7
Ub-specific processing proteases	0.00403406	3	Smad1/Smad2/Smad7
TP53 Regulates Metabolic Genes	0.0060061	2	Ddit4/Ywhaz
Deubiquitination	0.00874977	3	Smad1/Smad2/Smad7
Cluster J
Pathway	Adjusted P-value	Count	Gene ID
mRNA Splicing - Major Pathway	9.95667e-07	4	Eftud2/Rnps1/Srsf3/Srsf6
mRNA Splicing	9.95667e-07	4	Eftud2/Rnps1/Srsf3/Srsf6
Processing of Capped Intron-Containing Pre-mRNA	1.78249e-06	4	Eftud2/Rnps1/Srsf3/Srsf6
mRNA 3'-end processing	2.51473e-06	3	Rnps1/Srsf3/Srsf6
Cleavage of Growing Transcript in the Termination Region	2.68193e-06	3	Rnps1/Srsf3/Srsf6
RNA Polymerase II Transcription Termination	2.68193e-06	3	Rnps1/Srsf3/Srsf6
Transport of Mature mRNA derived from an Intron-Containing Transcript	2.89301e-06	3	Rnps1/Srsf3/Srsf6
Transport of Mature Transcript to Cytoplasm	2.89301e-06	3	Rnps1/Srsf3/Srsf6
mRNA Splicing - Minor Pathway	0.000267718	2	Eftud2/Srsf6
Cluster K
Pathway	Adjusted P-value	Count	Gene ID
Interconversion of nucleotide di- and triphosphates	5.48421e-08	4	Ak1/Dtymk/Nme4/Rrm2
Metabolism of nucleotides	4.94259e-06	4	Ak1/Dtymk/Nme4/Rrm2
Positive epigenetic regulation of rRNA expression	4.18704e-05	3	Mybbp1a/Polr1c/Polr1e
B-WICH complex positively regulates rRNA expression	4.18704e-05	3	Mybbp1a/Polr1c/Polr1e
Epigenetic regulation of gene expression	7.68183e-05	3	Mybbp1a/Polr1c/Polr1e
RNA Polymerase I Promoter Escape	0.000620499	2	Polr1c/Polr1e
RNA Polymerase I Transcription Termination	0.000620499	2	Polr1c/Polr1e
RNA Polymerase I Transcription Initiation	0.00117437	2	Polr1c/Polr1e
RNA Polymerase I Chain Elongation	0.0016915	2	Polr1c/Polr1e
RNA Polymerase I Promoter Clearance	0.00247557	2	Polr1c/Polr1e
RNA Polymerase I Transcription	0.00247557	2	Polr1c/Polr1e
NoRC negatively regulates rRNA expression	0.00297622	2	Polr1c/Polr1e
Cluster L
Pathway	Adjusted P-value	Count	Gene ID
mTORC1-mediated signalling	0.00325406	2	Eif4ebp1/Mtor
mTOR signalling	0.00402424	2	Eif4ebp1/Mtor
Regulation of PTEN gene transcription	0.00402424	2	Mtor/Rnf2
Cluster M
Pathway	Adjusted P-value	Count	Gene ID
No enrichment
Cluster N
Pathway	Adjusted P-value	Count	Gene ID
Activation of the pre-replicative complex	3.44566e-13	6	Cdt1/Mcm2/Mcm3/Mcm4/Mcm5/Pole2
G1/S Transition	3.44566e-13	7	Cdkn1a/Cdt1/Mcm2/Mcm3/Mcm4/Mcm5/Pole2
Synthesis of DNA	3.44566e-13	7	Cdkn1a/Cdt1/Mcm2/Mcm3/Mcm4/Mcm5/Pole2
DNA Replication	4.52653e-13	7	Cdkn1a/Cdt1/Mcm2/Mcm3/Mcm4/Mcm5/Pole2
Mitotic G1-G1/S phases	8.71135e-13	7	Cdkn1a/Cdt1/Mcm2/Mcm3/Mcm4/Mcm5/Pole2
S Phase	8.71135e-13	7	Cdkn1a/Cdt1/Mcm2/Mcm3/Mcm4/Mcm5/Pole2
Orc1 removal from chromatin	1.06821e-11	6	Cdkn1a/Cdt1/Mcm2/Mcm3/Mcm4/Mcm5
Switching of origins to a post-replicative state	1.06821e-11	6	Cdkn1a/Cdt1/Mcm2/Mcm3/Mcm4/Mcm5
Removal of licensing factors from origins	1.12837e-11	6	Cdkn1a/Cdt1/Mcm2/Mcm3/Mcm4/Mcm5
Regulation of DNA replication	1.30381e-11	6	Cdkn1a/Cdt1/Mcm2/Mcm3/Mcm4/Mcm5
M/G1 Transition	2.01855e-11	6	Cdt1/Mcm2/Mcm3/Mcm4/Mcm5/Pole2
DNA Replication Pre-Initiation	2.01855e-11	6	Cdt1/Mcm2/Mcm3/Mcm4/Mcm5/Pole2
Assembly of the pre-replicative complex	2.05753e-09	5	Cdt1/Mcm2/Mcm3/Mcm4/Mcm5
Cell Cycle, Mitotic	2.99478e-09	7	Cdkn1a/Cdt1/Mcm2/Mcm3/Mcm4/Mcm5/Pole2
Activation of ATR in response to replication stress	3.26775e-08	4	Mcm2/Mcm3/Mcm4/Mcm5
Cell Cycle Checkpoints	1.74338e-06	5	Cdkn1a/Mcm2/Mcm3/Mcm4/Mcm5
G2/M Checkpoints	7.90472e-06	4	Mcm2/Mcm3/Mcm4/Mcm5
Cluster O
Pathway	Adjusted P-value	Count	Gene ID
Regulation of KIT signaling	0.000572992	2	Fyn/Sos1
Axon guidance	0.000572992	3	Fyn/Gab1/Sos1
DAP12 signaling	0.000572992	2	Fyn/Sos1
RET signaling	0.000572992	2	Gab1/Sos1
NCAM signaling for neurite out-growth	0.000572992	2	Fyn/Sos1
Downstream signaling of activated FGFR2	0.000572992	2	Gab1/Sos1
Downstream signaling of activated FGFR3	0.000572992	2	Gab1/Sos1
Downstream signaling of activated FGFR4	0.000572992	2	Gab1/Sos1
Signaling by SCF-KIT	0.000572992	2	Fyn/Sos1
Signaling by EGFR	0.000572992	2	Gab1/Sos1
Downstream signaling of activated FGFR1	0.000572992	2	Gab1/Sos1
DAP12 interactions	0.000572992	2	Fyn/Sos1
Interleukin-3, 5 and GM-CSF signaling	0.000572992	2	Fyn/Sos1
IRS-mediated signalling	0.000572992	2	Gab1/Sos1
Signaling by ERBB2	0.000572992	2	Gab1/Sos1
IRS-related events triggered by IGF1R	0.000592367	2	Gab1/Sos1
IGF1R signaling cascade	0.000592367	2	Gab1/Sos1
Signaling by Type 1 Insulin-like Growth Factor 1 Receptor (IGF1R)	0.000592367	2	Gab1/Sos1
Insulin receptor signalling cascade	0.000592367	2	Gab1/Sos1
Signaling by FGFR4	0.000605655	2	Gab1/Sos1
Cluster P
Pathway	Adjusted P-value	Count	Gene ID
Interconversion of nucleotide di- and triphosphates	5.26155e-05	3	Dtymk/Nme4/Rrm2
Metabolism of nucleotides	0.00122881	3	Dtymk/Nme4/Rrm2
Telomere C-strand (Lagging Strand) Synthesis	0.00180564	2	Pole2/Rfc1
Telomere Maintenance	0.00180564	2	Pole2/Rfc1
Extension of Telomeres	0.00180564	2	Pole2/Rfc1
DNA Repair	0.00706624	3	Msh2/Rfc1/Xrcc5
Chromosome Maintenance	0.0078839	2	Pole2/Rfc1
